# Supplementary material
Source: PubMed Central journal article supplement (PMC6925959)
Supplement: NIHMS1028877-supplement-Supporting_Information.pdf [file NIHMS1028877-supplement-Supporting_Information.pdf]

## Supporting Information

### Structure Guided Design, Synthesis, and Biological Evaluation of Novel Benzosuberene Analogues as Inhibitors of Tubulin Polymerization

Haichan Niu<sup>a</sup>, Tracy E. Strecker<sup>a</sup>, Jeni L. Gerberich<sup>b</sup>, James W. Campbell III<sup>b</sup>, Debabrata Saha<sup>c</sup>, Deboprosad Mondal<sup>a</sup>, Ernest Hamel<sup>d</sup>, David J. Chaplin<sup>a,e</sup>, Ralph P. Mason<sup>b</sup>, Mary Lynn Trawick<sup>a</sup>, and Kevin G. Pinney<sup>a\*</sup>

<sup>a</sup> Department of Chemistry and Biochemistry, Baylor University, One Bear Place #97348, Waco, Texas 76798-7348, United States

<sup>b</sup> Department of Radiology, The University of Texas Southwestern Medical Center, 5323 Harry Hines Boulevard, Dallas, Texas 75390-9058, United States

<sup>c</sup> Department of Radiology Oncology, Division of Molecular Radiation Biology, The University of Texas Southwestern Medical Center, 2201 Inwood Road, Dallas, Texas 75390-9187, United States

<sup>d</sup> Screening Technologies Branch, Developmental Therapeutics Program, Division of Cancer Treatment and Diagnosis, National Cancer Institute, Frederick National Laboratory for Cancer Research, National Institutes of Health, Frederick, Maryland 21702, United States

<sup>e</sup> Mateon Therapeutics, Inc., 701 Gateway Boulevard, Suite 210, South San Francisco, California 94080, United States

\*Corresponding author. Tel.: +1 254 710 4117; fax: +1 254 710 4272.

E-mail address: Kevin\_Pinney@baylor.edu (K.G. Pinney).

## Supporting Information Table of Contents

|                                                                      |     |
|----------------------------------------------------------------------|-----|
| $^1\text{H}$ NMR and $^{13}\text{C}$ NMR of compound 2               | S5  |
| $^1\text{H}$ NMR, $^{13}\text{C}$ NMR, HPLC, and HRMS of compound 3  | S6  |
| $^1\text{H}$ NMR and $^{13}\text{C}$ NMR of compound 4               | S12 |
| $^1\text{H}$ NMR and $^{13}\text{C}$ NMR of compound 5               | S13 |
| $^1\text{H}$ NMR, $^{13}\text{C}$ NMR, HPLC, and HRMS of compound 6  | S14 |
| $^1\text{H}$ NMR, $^{13}\text{C}$ NMR of compound 7                  | S21 |
| $^1\text{H}$ NMR, $^{13}\text{C}$ NMR, HPLC, and HRMS of compound 8  | S22 |
| $^1\text{H}$ NMR and $^{13}\text{C}$ NMR of compound 10              | S29 |
| $^1\text{H}$ NMR, $^{13}\text{C}$ NMR, HPLC, and HRMS of compound 11 | S30 |
| $^1\text{H}$ NMR, $^{13}\text{C}$ NMR, HPLC, and HRMS of compound 13 | S38 |
| $^1\text{H}$ NMR, $^{13}\text{C}$ NMR, HPLC, and HRMS of compound 14 | S43 |
| $^1\text{H}$ NMR, $^{13}\text{C}$ NMR, HPLC, and HRMS of compound 15 | S50 |
| $^1\text{H}$ NMR, $^{13}\text{C}$ NMR, HPLC, and HRMS of compound 18 | S56 |
| $^1\text{H}$ NMR, $^{13}\text{C}$ NMR, HPLC, and HRMS of compound 19 | S63 |
| $^1\text{H}$ NMR, $^{13}\text{C}$ NMR, HPLC, and HRMS of compound 20 | S70 |
| $^1\text{H}$ NMR and $^{13}\text{C}$ NMR of compound 22              | S76 |
| $^1\text{H}$ NMR and $^{13}\text{C}$ NMR of compound 24              | S77 |
| $^1\text{H}$ NMR and $^{13}\text{C}$ NMR of compound 25              | S78 |
| $^1\text{H}$ NMR and $^{13}\text{C}$ NMR of compound 26              | S79 |
| $^1\text{H}$ NMR, $^{13}\text{C}$ NMR, HPLC, and HRMS of compound 27 | S80 |

|                                                                      |      |
|----------------------------------------------------------------------|------|
| $^1\text{H}$ NMR, $^{13}\text{C}$ NMR, HPLC, and HRMS of compound 28 | S90  |
| $^1\text{H}$ NMR and $^{13}\text{C}$ NMR of compound 30              | S96  |
| $^1\text{H}$ NMR and $^{13}\text{C}$ NMR of compound 31              | S97  |
| $^1\text{H}$ NMR and $^{13}\text{C}$ NMR of compound 32              | S98  |
| $^1\text{H}$ NMR and $^{13}\text{C}$ NMR of compound 33              | S99  |
| $^1\text{H}$ NMR and $^{13}\text{C}$ NMR of compound 34              | S100 |
| $^1\text{H}$ NMR and $^{13}\text{C}$ NMR of compound 35              | S101 |
| $^1\text{H}$ NMR and $^{13}\text{C}$ NMR of compound 36              | S102 |
| $^1\text{H}$ NMR, $^{13}\text{C}$ NMR, HPLC, and HRMS of compound 37 | S103 |
| $^1\text{H}$ NMR and $^{13}\text{C}$ NMR of compound 39              | S112 |
| $^1\text{H}$ NMR and $^{13}\text{C}$ NMR of compound 41              | S113 |
| $^1\text{H}$ NMR and $^{13}\text{C}$ NMR of compound 42              | S114 |
| $^1\text{H}$ NMR and $^{13}\text{C}$ NMR of compound 43              | S115 |
| $^1\text{H}$ NMR and $^{13}\text{C}$ NMR of compound 44              | S116 |
| $^1\text{H}$ NMR and $^{13}\text{C}$ NMR of compound 45              | S117 |
| $^1\text{H}$ NMR and $^{13}\text{C}$ NMR of compound 46              | S118 |
| $^1\text{H}$ NMR and $^{13}\text{C}$ NMR of compound 47              | S119 |
| $^1\text{H}$ NMR and $^{13}\text{C}$ NMR of compound 48              | S120 |
| $^1\text{H}$ NMR, $^{13}\text{C}$ NMR, HPLC, and HRMS of compound 49 | S121 |
| $^1\text{H}$ NMR and $^{13}\text{C}$ NMR of compound 52              | S130 |
| $^1\text{H}$ NMR and $^{13}\text{C}$ NMR of compound 53              | S131 |
| $^1\text{H}$ NMR and $^{13}\text{C}$ NMR of compound 54              | S132 |
| $^1\text{H}$ NMR and $^{13}\text{C}$ NMR of compound 55              | S133 |

|                                                                                     |      |
|-------------------------------------------------------------------------------------|------|
| $^1\text{H}$ NMR, $^{13}\text{C}$ NMR, HPLC, and HRMS of compound 56                | S134 |
| $^1\text{H}$ NMR, $^{13}\text{C}$ NMR, HPLC, and HRMS of compound 57                | S141 |
| $^1\text{H}$ NMR and $^{13}\text{C}$ NMR of compound 58                             | S148 |
| $^1\text{H}$ NMR and $^{13}\text{C}$ NMR of compound 60                             | S149 |
| $^1\text{H}$ NMR and $^{13}\text{C}$ NMR of compound 61                             | S150 |
| $^1\text{H}$ NMR and $^{13}\text{C}$ NMR of compound 62                             | S151 |
| $^1\text{H}$ NMR and $^{13}\text{C}$ NMR of compound 63                             | S152 |
| $^1\text{H}$ NMR and $^{13}\text{C}$ NMR of compound 64                             | S153 |
| $^1\text{H}$ NMR and $^{13}\text{C}$ NMR of compound 65                             | S154 |
| $^1\text{H}$ NMR and $^{13}\text{C}$ NMR of compound 66                             | S155 |
| $^1\text{H}$ NMR and $^{13}\text{C}$ NMR of compound 67                             | S156 |
| $^1\text{H}$ NMR, $^{13}\text{C}$ NMR, HPLC, and HRMS of compound 68                | S157 |
| $^1\text{H}$ , $^{13}\text{C}$ , $^{31}\text{P}$ NMR, HPLC, and HRMS of compound 69 | S164 |
| Table of Biological Data with Standard Deviations                                   | S173 |

**2. 1-((Tert-butyldimethylsilyl)oxy)-2-methoxy-5-(3,4,5-trimethoxyphenyl)-6,7,8,9-tetrahydro-5H-benzo[7]annulen-5-ol**

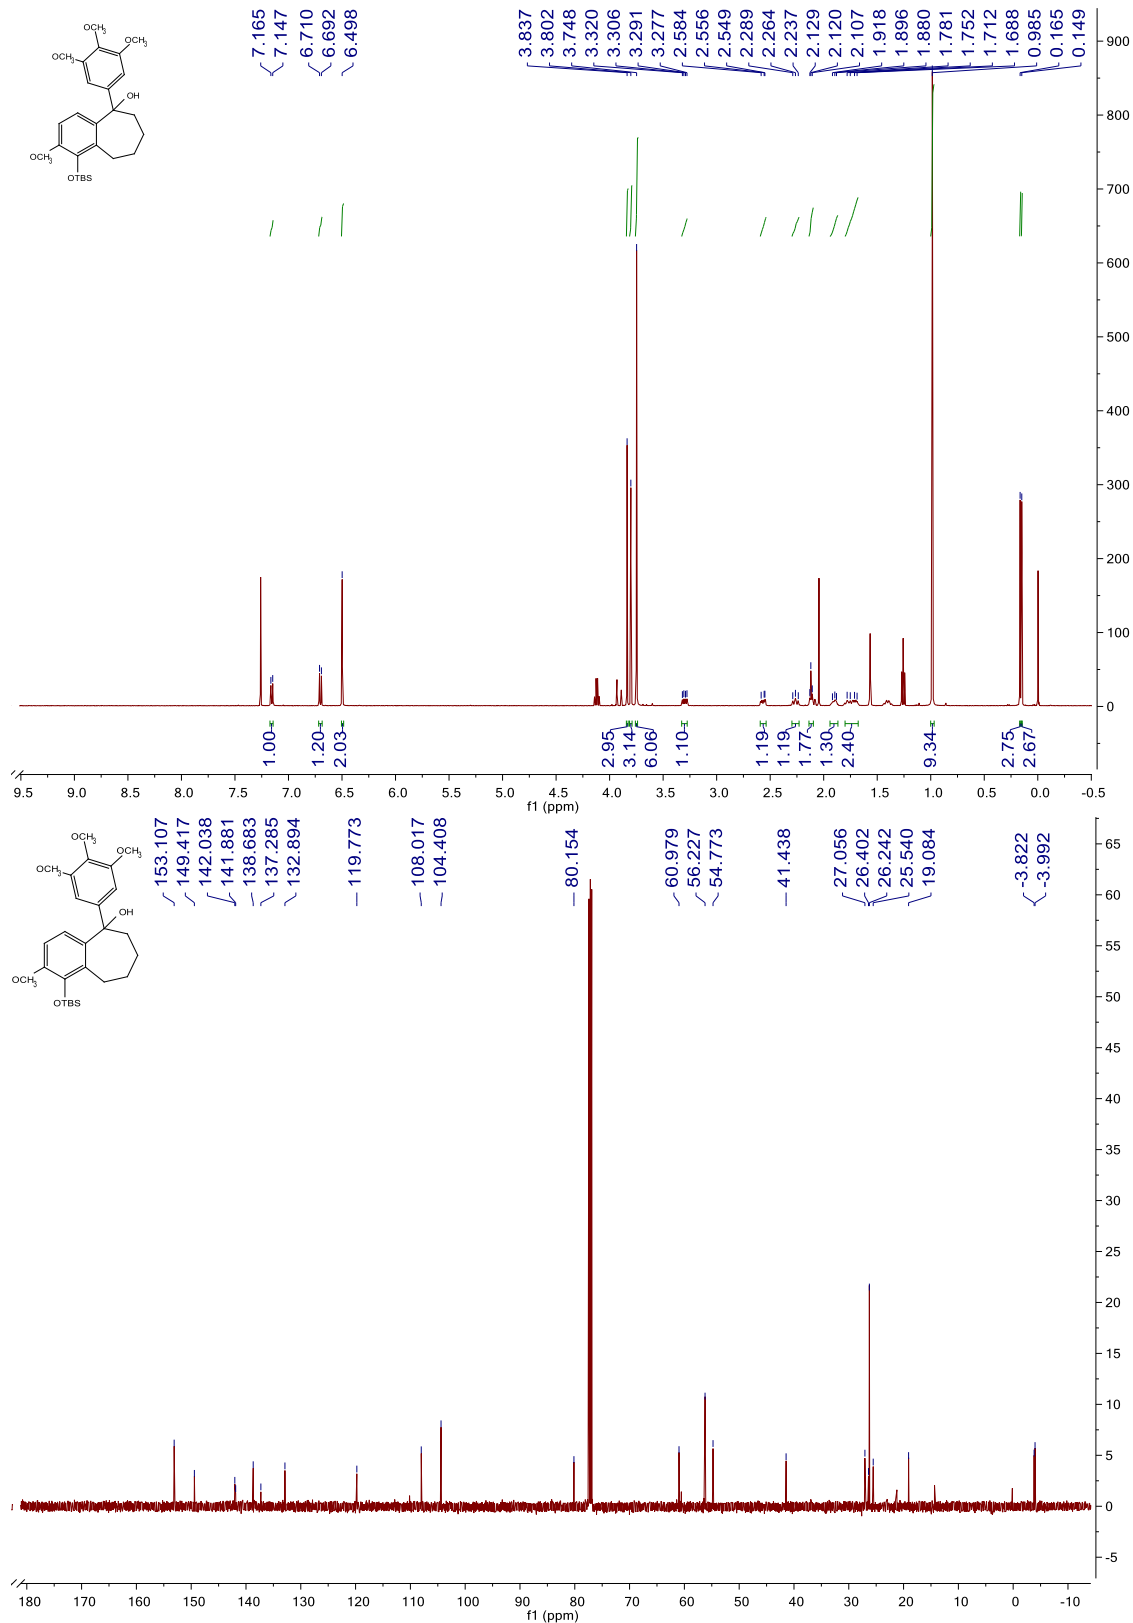

### 3. 2-Methoxy-5-(3,4,5-trimethoxyphenyl)-6,7,8,9-tetrahydro-5H-benzo[7]annulene-1,5-diol

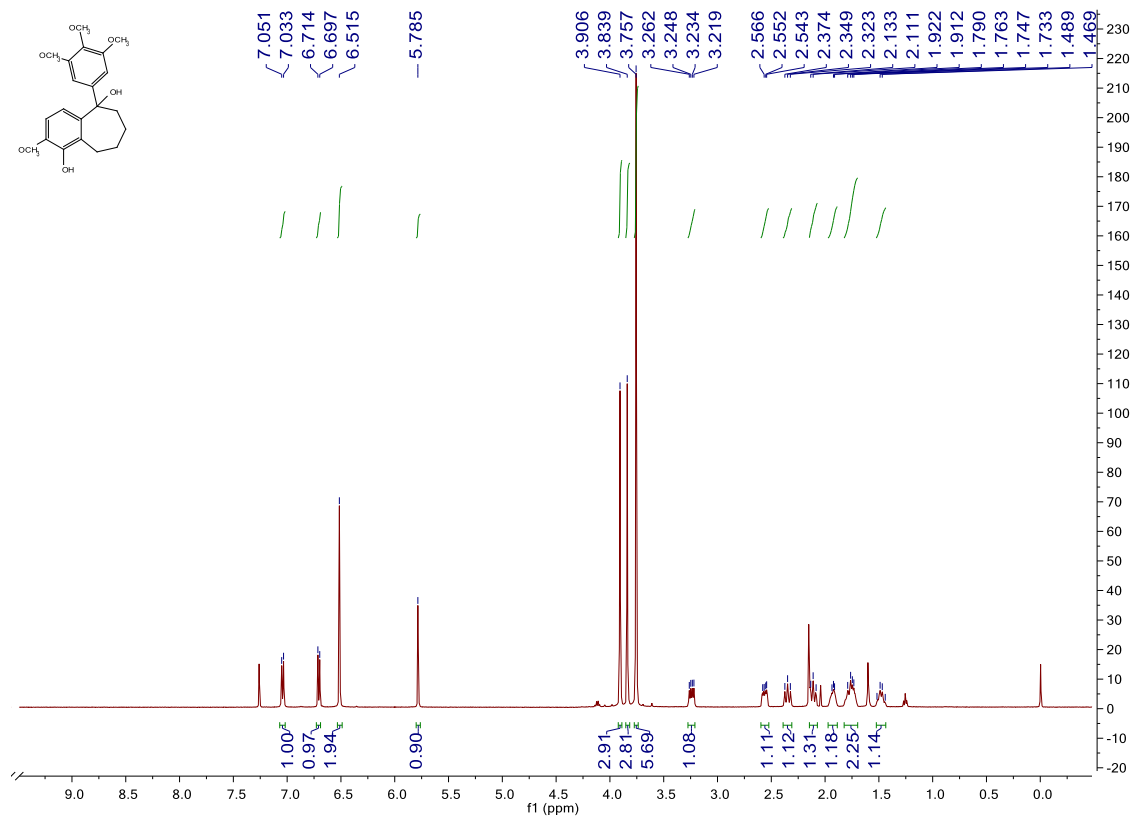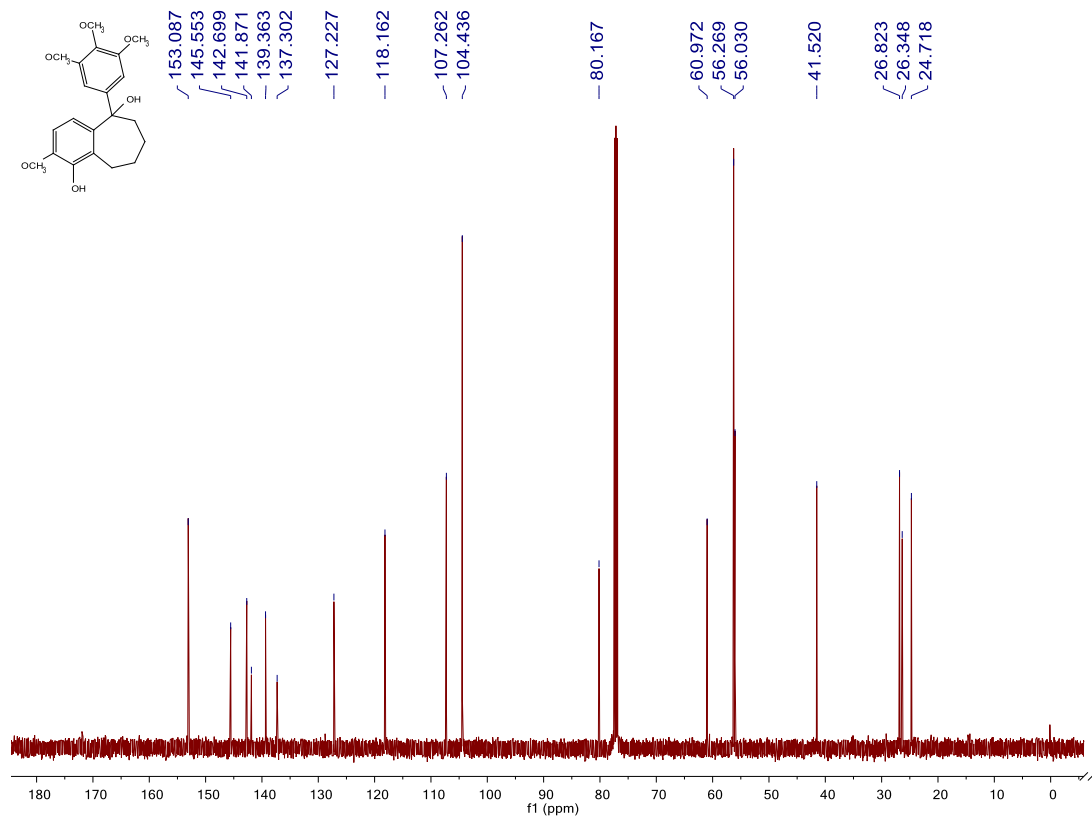

KGP423 with tertiary alcohol NHC\_1\_137\_Orbi\_+ESI #500 RT: 4.38 AV: 1 NL: 3.25E7  
T: FTMS + p ESI Full ms [150.00-500.00]

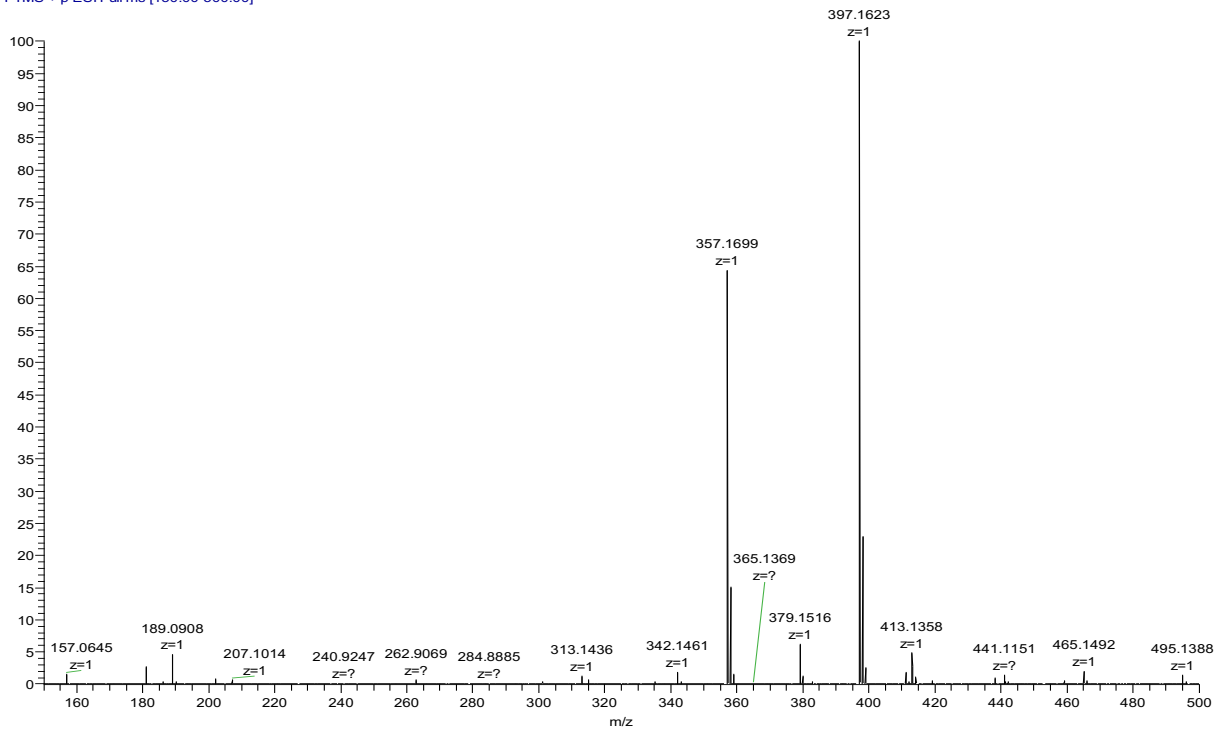





Data File C:\Chem32\1\Data\NHC\KGP423\_Concentrated.D  
Sample Name: KGP423\_Concentrated

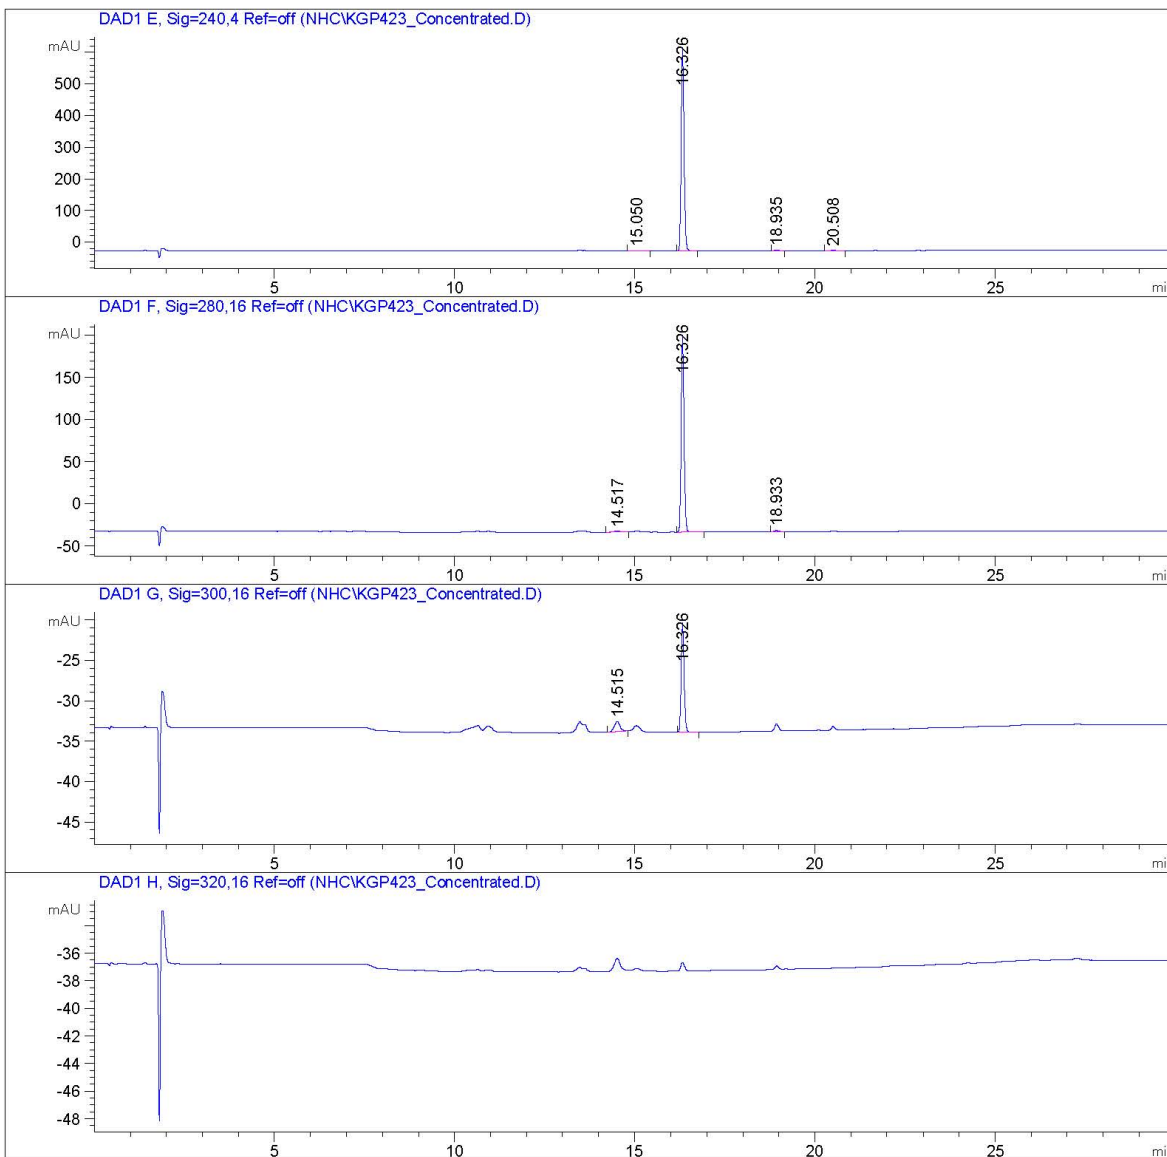

=====  
Area Percent Report  
=====

Sorted By : Signal  
Multiplier : 1.0000  
Dilution : 1.0000  
Use Multiplier & Dilution Factor with ISTDs

Data File C:\Chem32\1\Data\NHC\KGP423\_Concentrated.D  
Sample Name: KGP423\_Concentrated

Signal 1: DAD1 A, Sig=254,4 Ref=off

| Peak # | RetTime [min] | Type | Width [min] | Area [mAU*s] | Height [mAU] | Area %  |
|--------|---------------|------|-------------|--------------|--------------|---------|
| 1      | 14.516        | BB   | 0.1778      | 12.18939     | 1.06303      | 2.0882  |
| 2      | 16.326        | BB   | 0.0890      | 549.49310    | 95.70014     | 94.1337 |
| 3      | 18.935        | BB   | 0.1072      | 11.11266     | 1.59757      | 1.9037  |
| 4      | 20.507        | BB   | 0.1137      | 10.94184     | 1.45591      | 1.8744  |

Totals : 583.73699 99.81665

Signal 2: DAD1 B, Sig=254,16 Ref=off

| Peak # | RetTime [min] | Type | Width [min] | Area [mAU*s] | Height [mAU] | Area %  |
|--------|---------------|------|-------------|--------------|--------------|---------|
| 1      | 14.516        | BB   | 0.1777      | 11.84406     | 1.03376      | 1.3883  |
| 2      | 16.326        | BB   | 0.0887      | 819.88495    | 143.44756    | 96.1059 |
| 3      | 18.935        | BB   | 0.1082      | 12.16774     | 1.72736      | 1.4263  |
| 4      | 20.508        | BB   | 0.1051      | 9.20869      | 1.35873      | 1.0794  |

Totals : 853.10544 147.56741

Signal 3: DAD1 C, Sig=210,8 Ref=off

| Peak # | RetTime [min] | Type | Width [min] | Area [mAU*s] | Height [mAU] | Area %  |
|--------|---------------|------|-------------|--------------|--------------|---------|
| 1      | 13.477        | BB   | 0.2327      | 39.49652     | 2.36664      | 0.2233  |
| 2      | 14.512        | BB   | 0.1700      | 14.40840     | 1.33437      | 0.0815  |
| 3      | 15.039        | BB   | 0.1902      | 13.94672     | 1.17727      | 0.0788  |
| 4      | 16.326        | BB   | 0.1244      | 1.75529e4    | 2316.53833   | 99.2274 |
| 5      | 18.934        | BB   | 0.1035      | 24.18566     | 3.64064      | 0.1367  |
| 6      | 20.507        | BB   | 0.1167      | 30.13945     | 3.87693      | 0.1704  |
| 7      | 22.860        | BB   | 0.0957      | 7.71542      | 1.22161      | 0.0436  |
| 8      | 23.742        | BB   | 0.0942      | 6.77223      | 1.12567      | 0.0383  |

Totals : 1.76896e4 2331.28146

Signal 4: DAD1 D, Sig=230,16 Ref=off

| Peak # | RetTime [min] | Type | Width [min] | Area [mAU*s] | Height [mAU] | Area %  |
|--------|---------------|------|-------------|--------------|--------------|---------|
| 1      | 10.928        | BB   | 0.2032      | 12.69255     | 1.06344      | 0.1792  |
| 2      | 13.479        | BB   | 0.1326      | 9.38471      | 1.15774      | 0.1325  |
| 3      | 14.516        | BB   | 0.1772      | 12.57849     | 1.11851      | 0.1776  |
| 4      | 15.049        | BB   | 0.2010      | 16.94126     | 1.36305      | 0.2392  |
| 5      | 16.326        | BB   | 0.0892      | 6985.17969   | 1213.45679   | 98.6394 |

Data File C:\Chem32\1\Data\NHC\KGP423\_Concentrated.D  
Sample Name: KGP423\_Concentrated

| Peak # | RetTime [min] | Type | Width [min] | Area [mAU*s] | Height [mAU] | Area % |
|--------|---------------|------|-------------|--------------|--------------|--------|
| 6      | 18.934        | BB   | 0.1110      | 26.36960     | 3.62025      | 0.3724 |
| 7      | 20.507        | BB   | 0.1126      | 18.38573     | 2.47801      | 0.2596 |

Totals : 7081.53202 1224.25779

Signal 5: DAD1 E, Sig=240,4 Ref=off

| Peak # | RetTime [min] | Type | Width [min] | Area [mAU*s] | Height [mAU] | Area %  |
|--------|---------------|------|-------------|--------------|--------------|---------|
| 1      | 15.050        | BB   | 0.2001      | 14.74686     | 1.16207      | 0.3973  |
| 2      | 16.326        | BB   | 0.0884      | 3665.24316   | 644.11462    | 98.7488 |
| 3      | 18.935        | BB   | 0.1071      | 19.65609     | 2.76107      | 0.5296  |
| 4      | 20.508        | BB   | 0.1164      | 12.03636     | 1.55380      | 0.3243  |

Totals : 3711.68247 649.59157

Signal 6: DAD1 F, Sig=280,16 Ref=off

| Peak # | RetTime [min] | Type | Width [min] | Area [mAU*s] | Height [mAU] | Area %  |
|--------|---------------|------|-------------|--------------|--------------|---------|
| 1      | 14.517        | BB   | 0.1784      | 12.28676     | 1.05104      | 0.9112  |
| 2      | 16.326        | BB   | 0.0881      | 1323.39343   | 233.58379    | 98.1393 |
| 3      | 18.933        | BB   | 0.1149      | 12.80499     | 1.68103      | 0.9496  |

Totals : 1348.48518 236.31586

Signal 7: DAD1 G, Sig=300,16 Ref=off

| Peak # | RetTime [min] | Type | Width [min] | Area [mAU*s] | Height [mAU] | Area %  |
|--------|---------------|------|-------------|--------------|--------------|---------|
| 1      | 14.515        | BB   | 0.1796      | 14.69596     | 1.26399      | 15.6681 |
| 2      | 16.326        | BB   | 0.0902      | 79.09951     | 13.52710     | 84.3319 |

Totals : 93.79547 14.79109

Signal 8: DAD1 H, Sig=320,16 Ref=off

=====  
\*\*\* End of Report \*\*\*

#### 4. Tert-butyl((3-methoxy-9-(3,4,5-trimethoxyphenyl)-6,7-dihydro-5H-benzo[7]annulen-4-yl)oxy)dimethylsilane

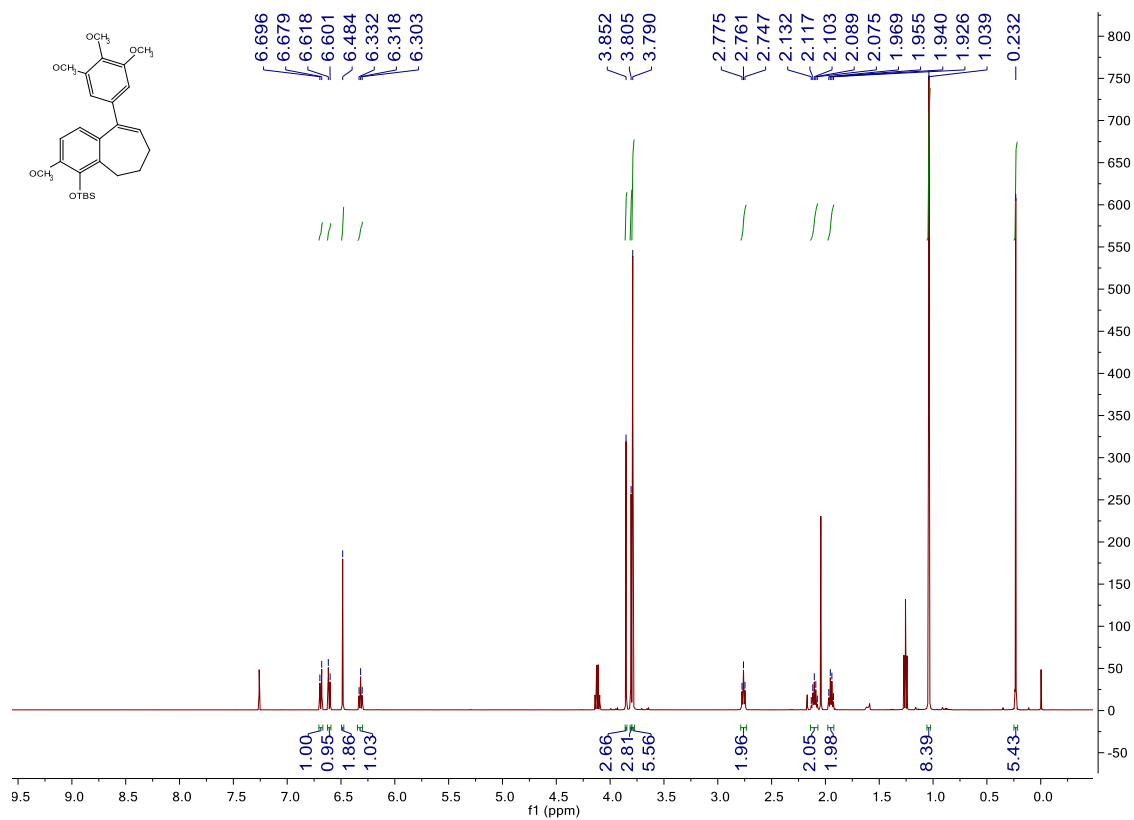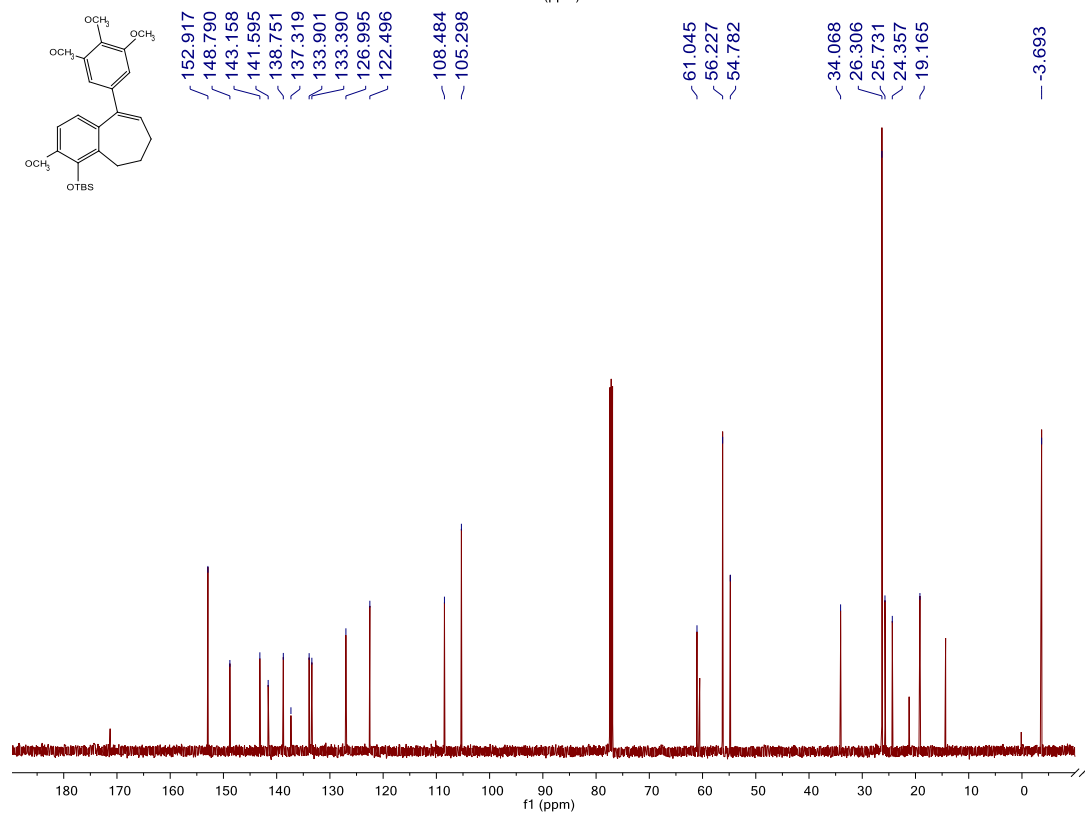

5. 1-((tert-butyltrimethylsilyloxy)-5-hydroxy-2-methoxy-5-(3,4,5-trimethoxyphenyl)-5,7,8,9-tetrahydro-6H-benzo[7]annulen-6-one

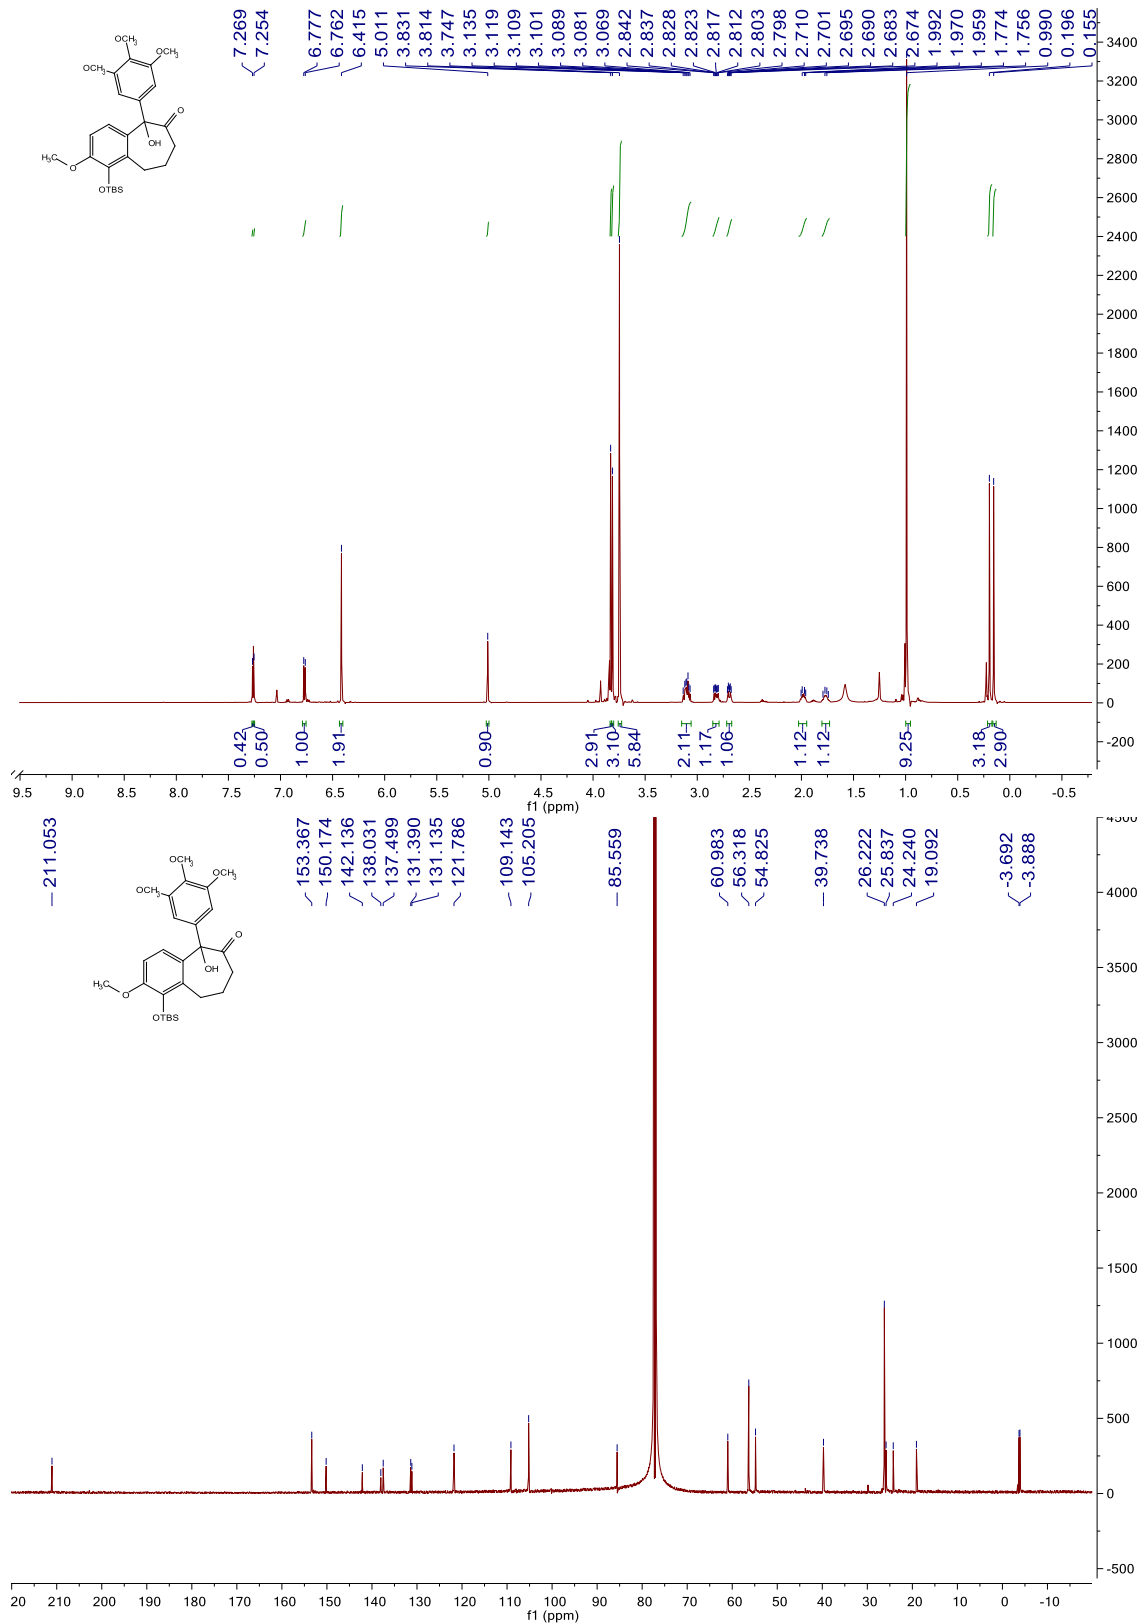

**6. 1,5-dihydroxy-2-methoxy-5-(3,4,5-trimethoxyphenyl)-5,7,8,9-tetrahydro-6H-benzo[7]annulen-6-one**

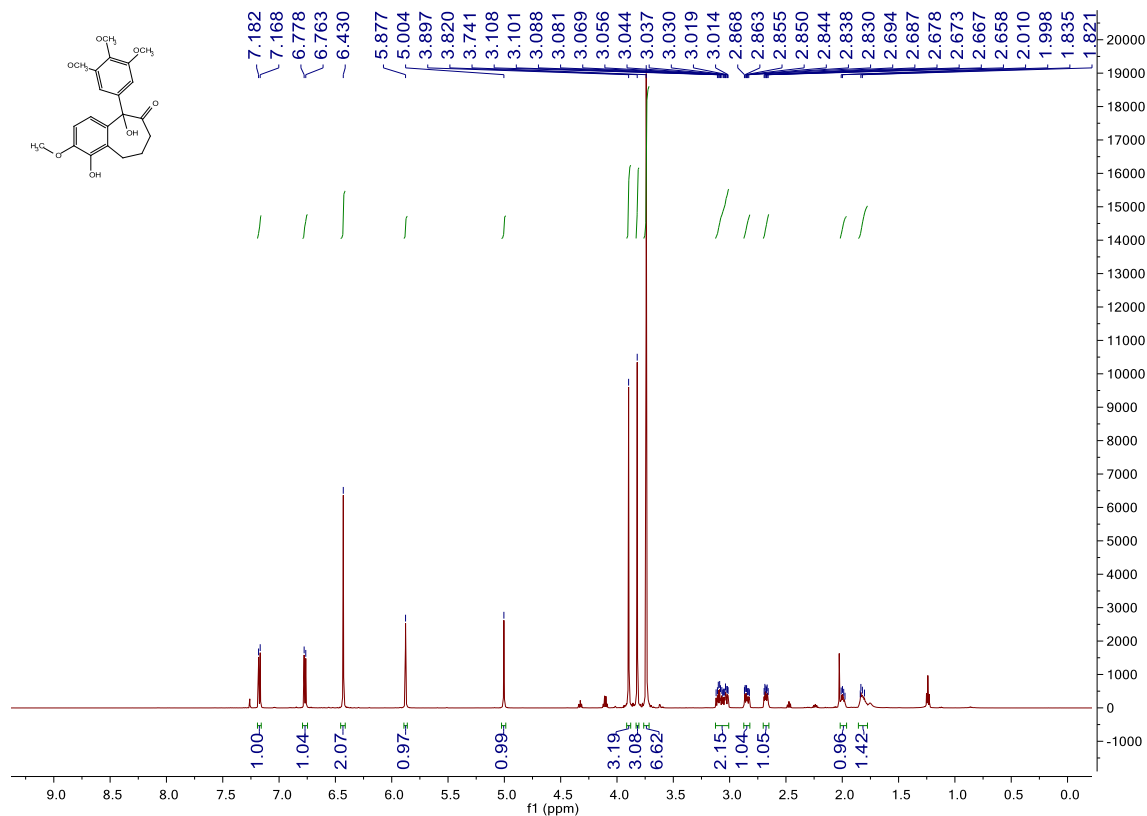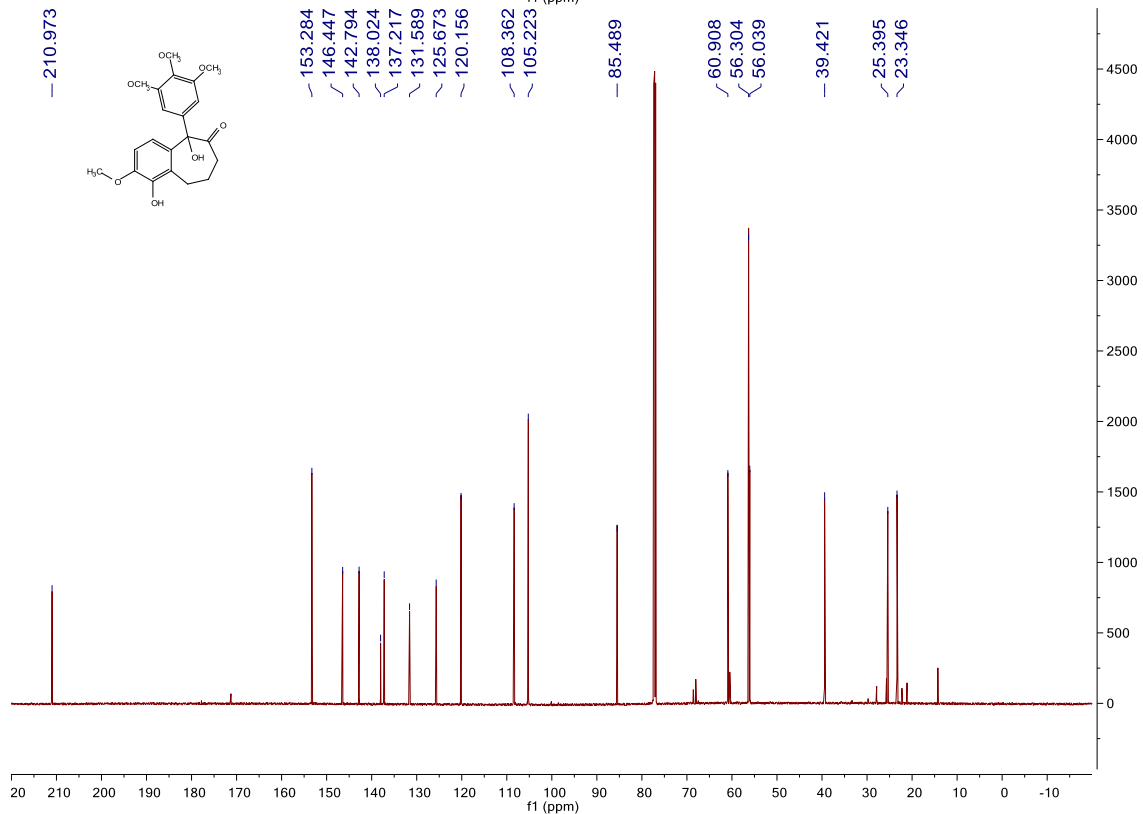

NHC\_5\_05\_+esi #2-18 RT: 0.01-0.16 AV: 17 NL: 1.27E7  
T: FTMS + p ESI Full ms [200.00-1000.00]

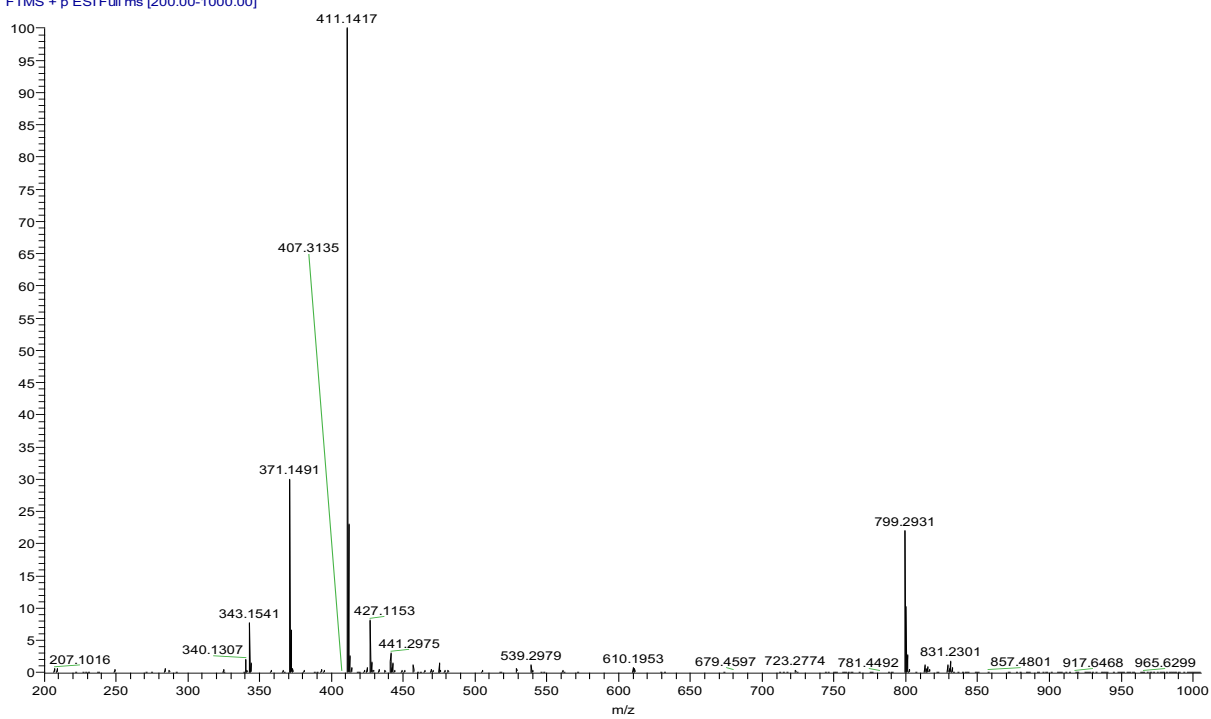





Data File C:\Chem32\1\Data\NHC\NHC\_5\_18\_sample.D  
Sample Name: NHC\_5\_18\_sample

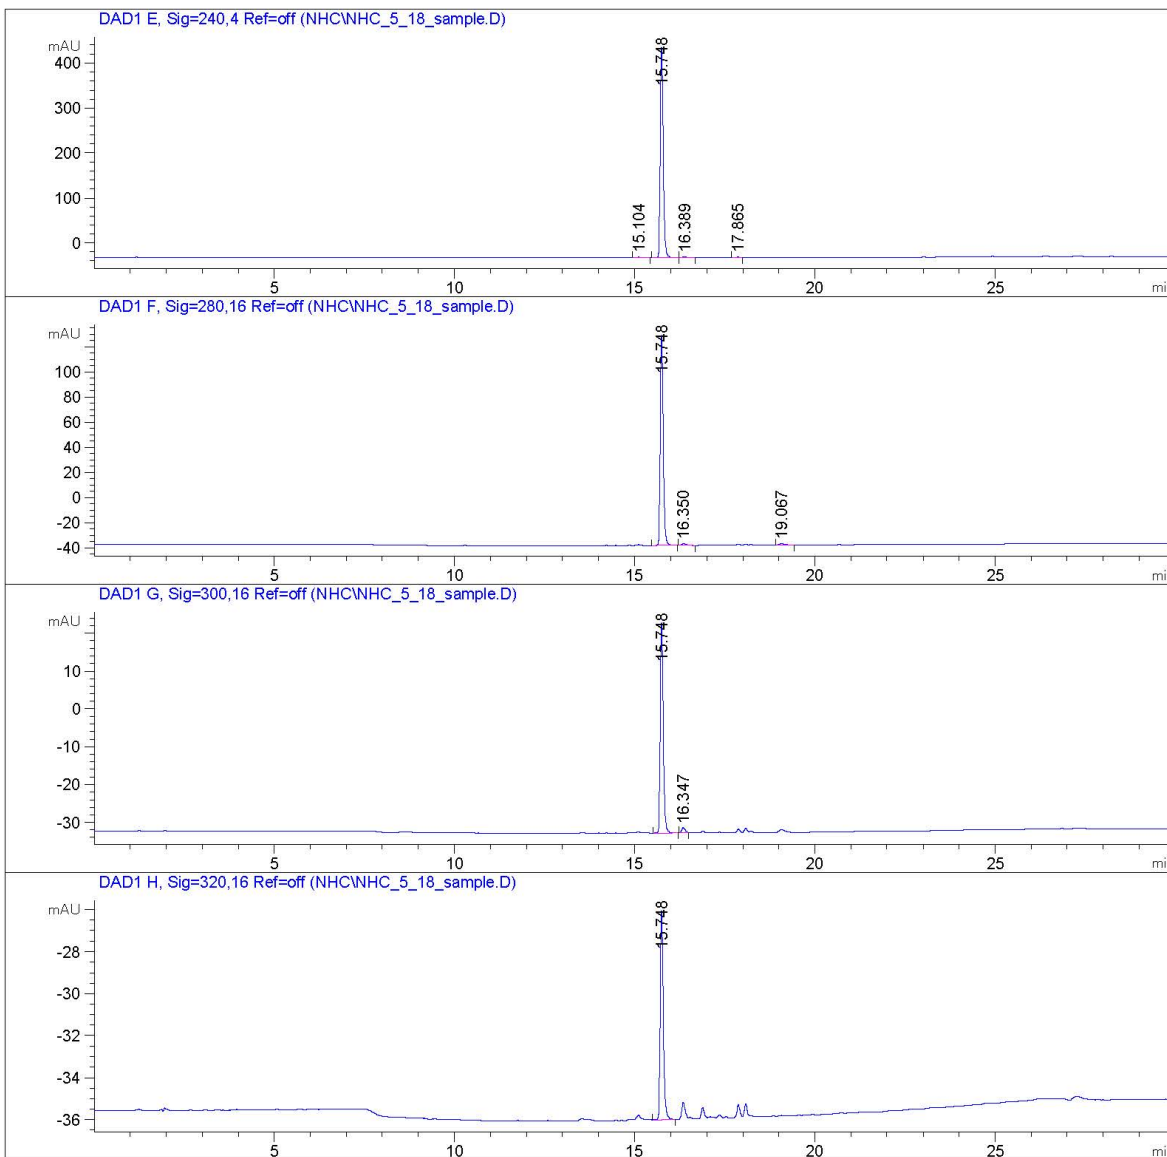

=====  
Area Percent Report  
=====

Sorted By : Signal  
Multiplier : 1.0000  
Dilution : 1.0000  
Use Multiplier & Dilution Factor with ISTDs

Data File C:\Chem32\1\Data\NHC\NHC\_5\_18\_sample.D  
Sample Name: NHC\_5\_18\_sample

Signal 1: DAD1 A, Sig=254,4 Ref=off

| Peak # | RetTime [min] | Type | Width [min] | Area [mAU*s] | Height [mAU] | Area %  |
|--------|---------------|------|-------------|--------------|--------------|---------|
| 1      | 15.748        | BB   | 0.0855      | 997.10504    | 177.72156    | 98.4605 |
| 2      | 23.900        | BB   | 0.0910      | 7.08494      | 1.19758      | 0.6996  |
| 3      | 24.937        | BB   | 0.0886      | 8.50512      | 1.49063      | 0.8398  |

Totals : 1012.69510 180.40977

Signal 2: DAD1 B, Sig=254,16 Ref=off

| Peak # | RetTime [min] | Type | Width [min] | Area [mAU*s] | Height [mAU] | Area %  |
|--------|---------------|------|-------------|--------------|--------------|---------|
| 1      | 15.748        | BB   | 0.0854      | 1126.68262   | 201.02759    | 98.7568 |
| 2      | 23.900        | BB   | 0.0910      | 6.48629      | 1.09726      | 0.5685  |
| 3      | 24.937        | BB   | 0.0885      | 7.69665      | 1.35074      | 0.6746  |

Totals : 1140.86556 203.47559

Signal 3: DAD1 C, Sig=210,8 Ref=off

| Peak # | RetTime [min] | Type | Width [min] | Area [mAU*s] | Height [mAU] | Area %  |
|--------|---------------|------|-------------|--------------|--------------|---------|
| 1      | 1.166         | BB   | 0.0835      | 47.85056     | 7.80683      | 0.3566  |
| 2      | 9.167         | BB   | 0.1063      | 13.97762     | 1.93481      | 0.1042  |
| 3      | 10.298        | BV   | 0.0906      | 33.77399     | 5.42592      | 0.2517  |
| 4      | 11.805        | BB   | 0.0789      | 7.71623      | 1.47941      | 0.0575  |
| 5      | 14.002        | VB   | 0.0815      | 9.81697      | 1.86147      | 0.0732  |
| 6      | 14.211        | BB   | 0.0787      | 13.73305     | 2.72825      | 0.1024  |
| 7      | 15.103        | BB   | 0.1282      | 63.81578     | 7.14180      | 0.4756  |
| 8      | 15.748        | BV   | 0.0926      | 1.07524e4    | 1827.57117   | 80.1394 |
| 9      | 16.378        | VB   | 0.1544      | 92.25219     | 9.24782      | 0.6876  |
| 10     | 16.876        | BV   | 0.1043      | 24.89547     | 3.52923      | 0.1856  |
| 11     | 17.057        | VV   | 0.0904      | 10.56320     | 1.80182      | 0.0787  |
| 12     | 17.476        | VB   | 0.1387      | 17.91890     | 1.79144      | 0.1336  |
| 13     | 17.868        | BV   | 0.0974      | 35.46511     | 5.64002      | 0.2643  |
| 14     | 18.090        | VV   | 0.1016      | 24.55433     | 3.69338      | 0.1830  |
| 15     | 18.229        | VV   | 0.0948      | 21.80468     | 3.39961      | 0.1625  |
| 16     | 18.394        | VV   | 0.1012      | 9.44995      | 1.35756      | 0.0704  |
| 17     | 18.646        | VB   | 0.1419      | 19.23294     | 1.84058      | 0.1433  |
| 18     | 19.079        | BV   | 0.1797      | 16.48769     | 1.43897      | 0.1229  |
| 19     | 20.868        | BV   | 0.5854      | 2181.10962   | 54.44286     | 16.2562 |
| 20     | 23.012        | VB   | 0.1443      | 20.28592     | 1.93512      | 0.1512  |

Totals : 1.34171e4 1946.06806

Data File C:\Chem32\1\Data\NHC\NHC\_5\_18\_sample.D  
Sample Name: NHC\_5\_18\_sample

Signal 4: DAD1 D, Sig=230,16 Ref=off

| Peak # | RetTime [min] | Type | Width [min] | Area [mAU*s] | Height [mAU] | Area %  |
|--------|---------------|------|-------------|--------------|--------------|---------|
| 1      | 1.169         | BB   | 0.0999      | 10.99118     | 1.49301      | 0.2517  |
| 2      | 10.298        | BB   | 0.0763      | 7.57351      | 1.51456      | 0.1735  |
| 3      | 15.103        | BB   | 0.1373      | 27.71015     | 2.85272      | 0.6347  |
| 4      | 15.748        | BB   | 0.0854      | 4229.88135   | 754.78497    | 96.8779 |
| 5      | 16.373        | BB   | 0.1419      | 30.43041     | 3.41769      | 0.6970  |
| 6      | 16.879        | BV   | 0.1020      | 10.01752     | 1.46037      | 0.2294  |
| 7      | 17.868        | BV   | 0.0959      | 13.96439     | 2.26496      | 0.3198  |
| 8      | 18.086        | VV   | 0.0952      | 10.92282     | 1.74124      | 0.2502  |
| 9      | 18.228        | VB   | 0.1007      | 7.61600      | 1.10094      | 0.1744  |
| 10     | 19.068        | BB   | 0.1620      | 17.09307     | 1.58321      | 0.3915  |

Totals : 4366.20038 772.21368

Signal 5: DAD1 E, Sig=240,4 Ref=off

| Peak # | RetTime [min] | Type | Width [min] | Area [mAU*s] | Height [mAU] | Area %  |
|--------|---------------|------|-------------|--------------|--------------|---------|
| 1      | 15.104        | BB   | 0.1199      | 12.98084     | 1.57981      | 0.4875  |
| 2      | 15.748        | BB   | 0.0852      | 2626.94897   | 469.82678    | 98.6648 |
| 3      | 16.389        | BB   | 0.1377      | 14.91375     | 1.74472      | 0.5601  |
| 4      | 17.865        | BV   | 0.0941      | 7.65627      | 1.23852      | 0.2876  |

Totals : 2662.49984 474.38983

Signal 6: DAD1 F, Sig=280,16 Ref=off

| Peak # | RetTime [min] | Type | Width [min] | Area [mAU*s] | Height [mAU] | Area %  |
|--------|---------------|------|-------------|--------------|--------------|---------|
| 1      | 15.748        | BB   | 0.0851      | 937.63831    | 168.07391    | 97.4011 |
| 2      | 16.350        | BB   | 0.1267      | 11.80592     | 1.51851      | 1.2264  |
| 3      | 19.067        | BB   | 0.1521      | 13.21233     | 1.28328      | 1.3725  |

Totals : 962.65655 170.87570

Signal 7: DAD1 G, Sig=300,16 Ref=off

| Peak # | RetTime [min] | Type | Width [min] | Area [mAU*s] | Height [mAU] | Area %  |
|--------|---------------|------|-------------|--------------|--------------|---------|
| 1      | 15.748        | BB   | 0.0856      | 313.61978    | 55.81817     | 97.2840 |
| 2      | 16.347        | BB   | 0.0971      | 8.75556      | 1.36054      | 2.7160  |

Totals : 322.37534 57.17871

Data File C:\Chem32\1\Data\NHC\NHC\_5\_18\_sample.D  
Sample Name: NHC\_5\_18\_sample

Signal 8: DAD1 H, Sig=320,16 Ref=off

| Peak # | RetTime [min] | Type | Width [min] | Area [mAU*s] | Height [mAU] | Area %   |
|--------|---------------|------|-------------|--------------|--------------|----------|
| 1      | 15.748        | BB   | 0.0873      | 57.64566     | 9.99286      | 100.0000 |

Totals :                    57.64566    9.99286

=====  
\*\*\* End of Report \*\*\*

7. 3-Methoxy-9-(3,4,5-trimethoxyphenyl)-6,7-dihydro-5H-benzo[7]annulen-4-ol

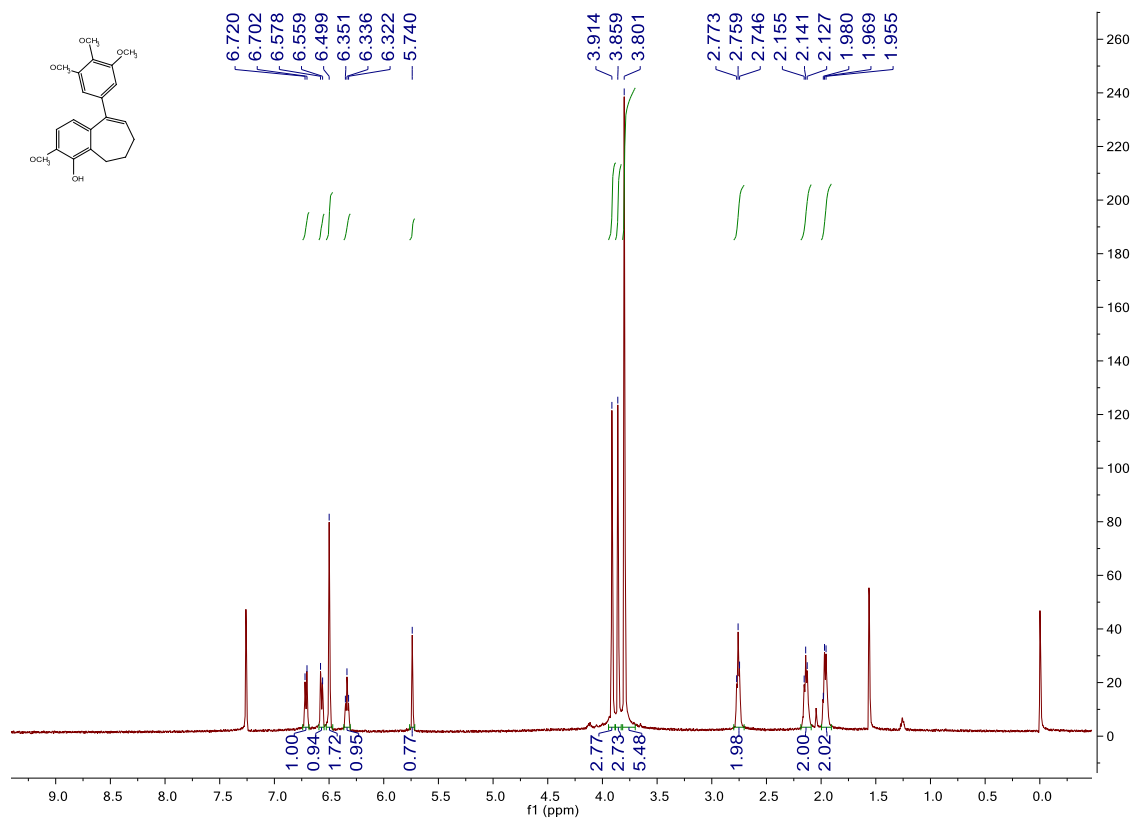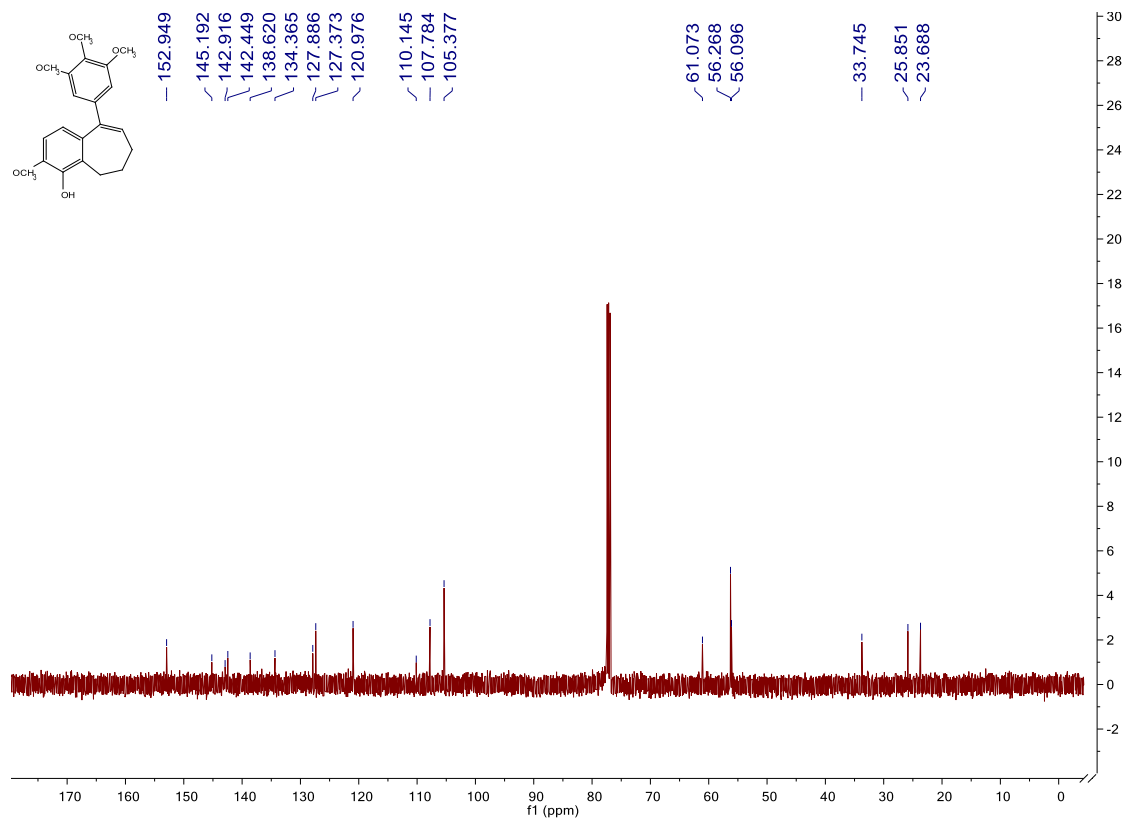

**8. 3-Methoxy-4-(2-(2-methoxyethoxy) ethoxy)-9-(3,4,5-trimethoxyphenyl)-6,7-dihydro-5H-benzo[7]annulene**

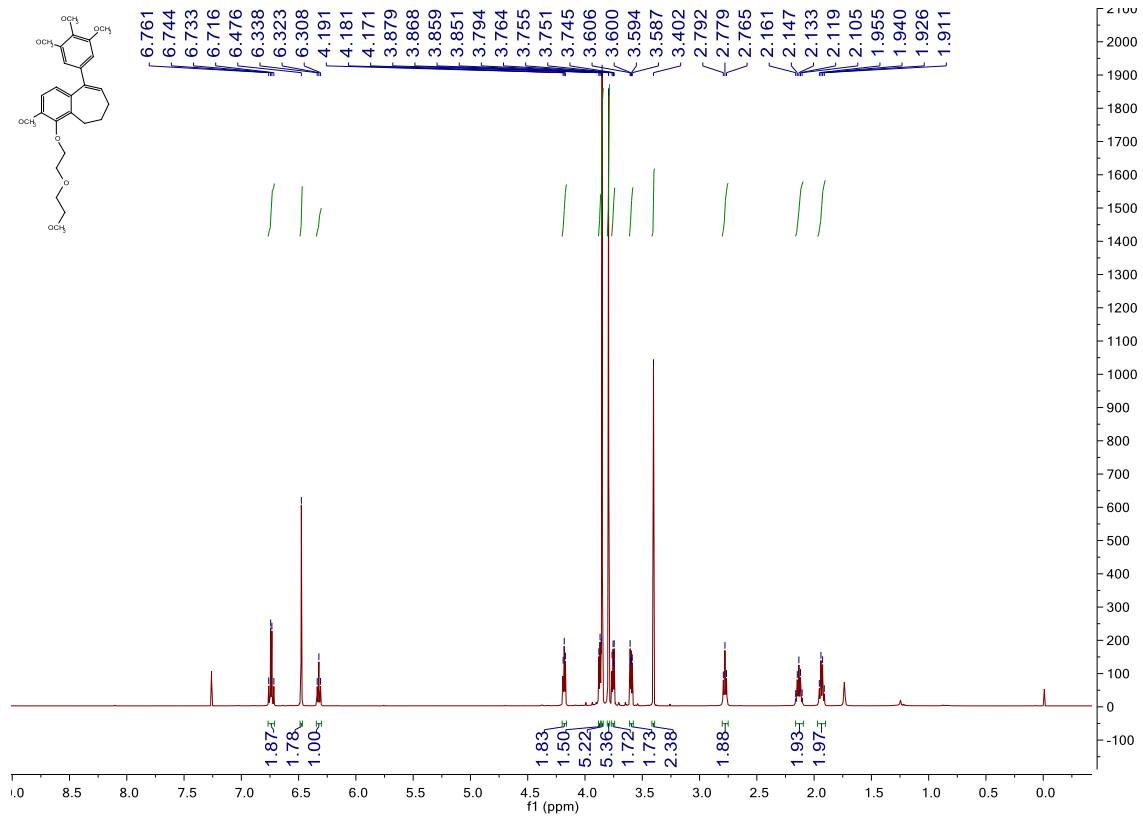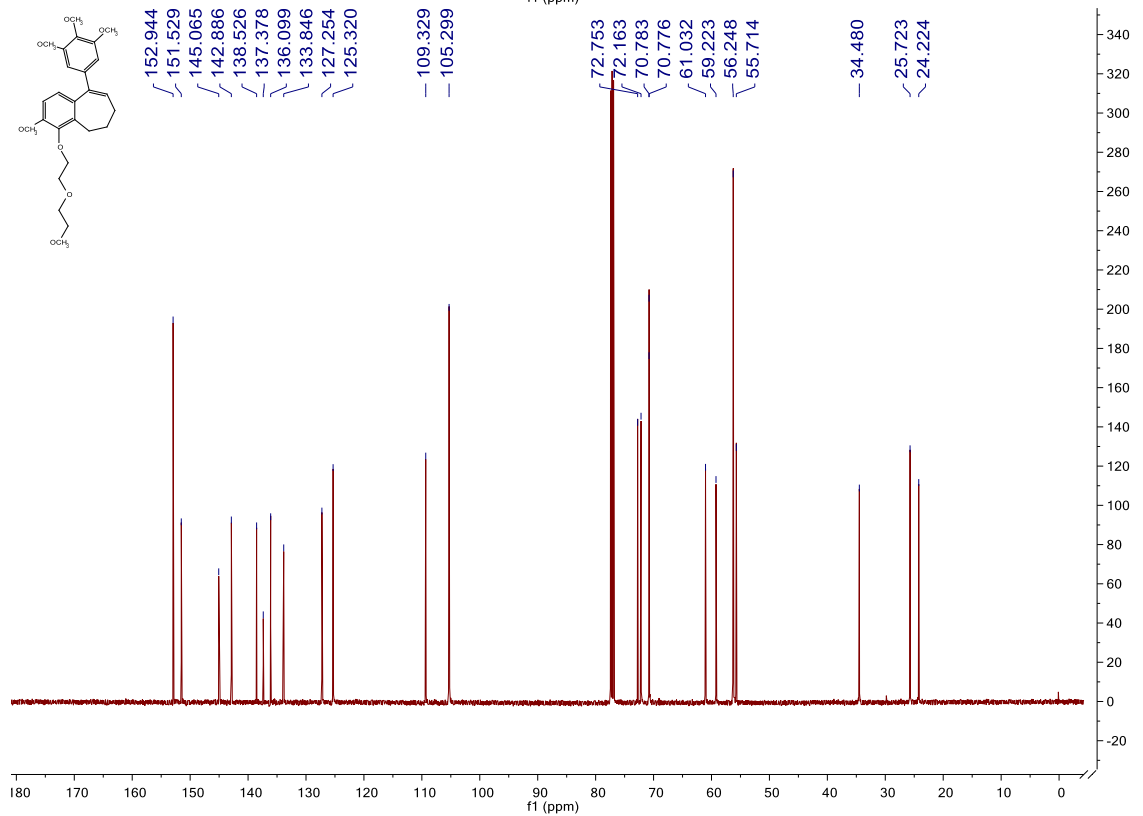

NHC\_1\_140\_03Sept2014 #500 RT: 4.06 AV: 1 NL: 2.52E8  
T: FTMS + p ESI Full ms [250.00-800.00]

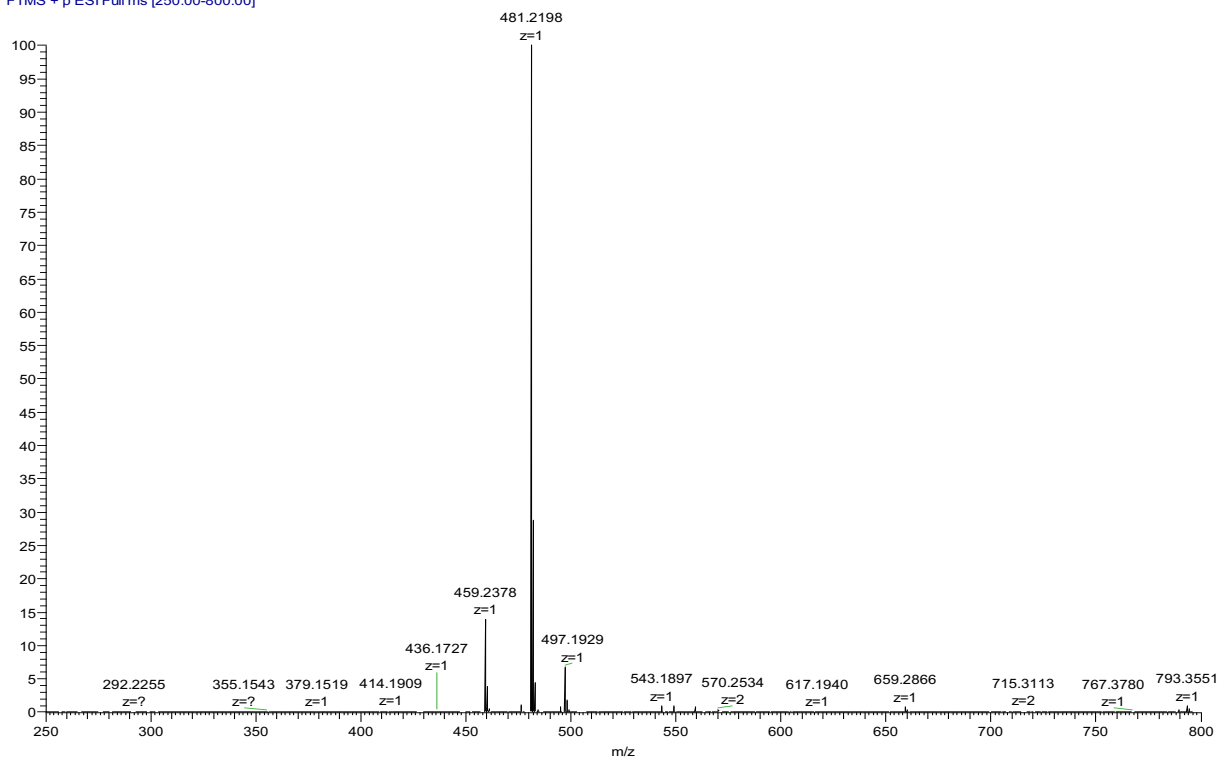





Data File C:\Chem32\1\Data\NHC\KGP425\_Concentrated.D  
 Sample Name: KGP425\_Concentrated

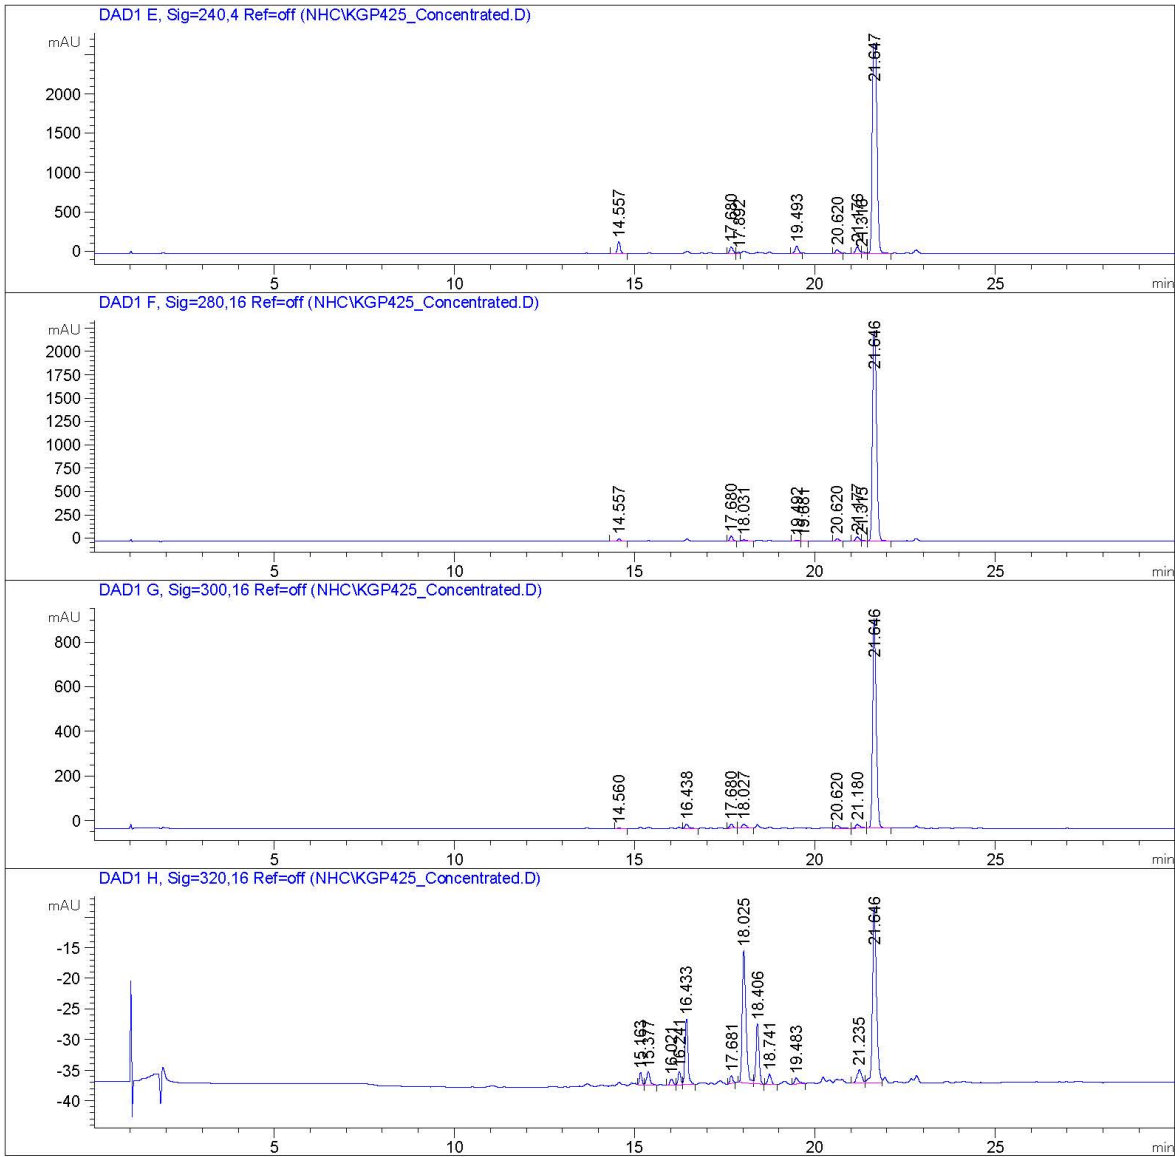

=====  
 Area Percent Report  
 =====

Sorted By : Signal  
 Multiplier : 1.0000  
 Dilution : 1.0000  
 Use Multiplier & Dilution Factor with ISTDs

Data File C:\Chem32\1\Data\NHC\KGP425\_Concentrated.D  
Sample Name: KGP425\_Concentrated

Signal 1: DAD1 A, Sig=254,4 Ref=off

| Peak # | RetTime [min] | Type | Width [min] | Area [mAU*s] | Height [mAU] | Area %  |
|--------|---------------|------|-------------|--------------|--------------|---------|
| 1      | 14.557        | BV   | 0.0823      | 118.86156    | 22.25858     | 0.4708  |
| 2      | 17.680        | BV   | 0.0892      | 490.85931    | 85.26562     | 1.9441  |
| 3      | 21.319        | VV   | 0.0847      | 118.80322    | 20.79025     | 0.4705  |
| 4      | 21.648        | VV   | 0.1564      | 2.42181e4    | 2513.18140   | 95.9184 |
| 5      | 22.813        | VB   | 0.1041      | 302.01974    | 45.12530     | 1.1962  |

Totals : 2.52486e4 2686.62115

Signal 2: DAD1 B, Sig=254,16 Ref=off

| Peak # | RetTime [min] | Type | Width [min] | Area [mAU*s] | Height [mAU] | Area %  |
|--------|---------------|------|-------------|--------------|--------------|---------|
| 1      | 14.557        | BV   | 0.0820      | 175.41304    | 33.01146     | 0.6943  |
| 2      | 17.680        | BV   | 0.0891      | 466.62897    | 81.11676     | 1.8470  |
| 3      | 20.620        | BV   | 0.0996      | 252.97607    | 39.05746     | 1.0013  |
| 4      | 21.318        | VV   | 0.0856      | 115.58350    | 19.96070     | 0.4575  |
| 5      | 21.647        | VV   | 0.1537      | 2.39580e4    | 2547.32373   | 94.8324 |
| 6      | 22.813        | VB   | 0.1059      | 294.92889    | 43.04778     | 1.1674  |

Totals : 2.52636e4 2763.51789

Signal 3: DAD1 C, Sig=210,8 Ref=off

| Peak # | RetTime [min] | Type | Width [min] | Area [mAU*s] | Height [mAU] | Area %  |
|--------|---------------|------|-------------|--------------|--------------|---------|
| 1      | 14.557        | BV   | 0.0843      | 5126.17432   | 960.03735    | 12.0626 |
| 2      | 16.447        | VB   | 0.1174      | 672.09033    | 87.72803     | 1.5815  |
| 3      | 17.680        | BB   | 0.0865      | 1067.51355   | 193.13002    | 2.5120  |
| 4      | 17.892        | BV   | 0.0797      | 215.70448    | 42.13689     | 0.5076  |
| 5      | 18.026        | VV   | 0.1079      | 627.46326    | 87.27602     | 1.4765  |
| 6      | 19.154        | BV   | 0.1083      | 72.89687     | 9.41314      | 0.1715  |
| 7      | 19.232        | VV   | 0.0910      | 54.21881     | 8.90705      | 0.1276  |
| 8      | 19.493        | VV   | 0.1006      | 2496.98657   | 380.27234    | 5.8758  |
| 9      | 20.620        | VV   | 0.1052      | 773.66321    | 111.09237    | 1.8205  |
| 10     | 20.823        | VB   | 0.0938      | 51.07826     | 8.30413      | 0.1202  |
| 11     | 21.178        | BV   | 0.1216      | 1603.45532   | 191.76048    | 3.7732  |
| 12     | 21.653        | VB   | 0.1959      | 2.90408e4    | 2421.63306   | 68.3371 |
| 13     | 22.813        | VB   | 0.1061      | 694.33698    | 101.09408    | 1.6339  |

Totals : 4.24964e4 4602.78496

Data File C:\Chem32\1\Data\NHC\KGP425\_Concentrated.D  
Sample Name: KGP425\_Concentrated

Signal 4: DAD1 D, Sig=230,16 Ref=off

| Peak # | RetTime [min] | Type | Width [min] | Area [mAU*s] | Height [mAU] | Area %  |
|--------|---------------|------|-------------|--------------|--------------|---------|
| 1      | 14.557        | BV   | 0.0818      | 1434.35364   | 270.67902    | 4.4262  |
| 2      | 17.680        | BV   | 0.0883      | 715.41840    | 125.79987    | 2.2077  |
| 3      | 17.892        | VV   | 0.0798      | 85.76254     | 16.17930     | 0.2646  |
| 4      | 18.026        | VB   | 0.1060      | 331.48679    | 46.01447     | 1.0229  |
| 5      | 19.492        | BV   | 0.0987      | 749.68884    | 117.13616    | 2.3134  |
| 6      | 20.831        | VB   | 0.0994      | 31.53558     | 4.75552      | 0.0973  |
| 7      | 21.177        | BV   | 0.1025      | 838.00244    | 124.61800    | 2.5859  |
| 8      | 21.315        | VV   | 0.0828      | 180.34955    | 32.48801     | 0.5565  |
| 9      | 21.648        | VV   | 0.1736      | 2.75846e4    | 2602.97729   | 85.1217 |
| 10     | 22.813        | VB   | 0.1050      | 454.86087    | 67.19091     | 1.4036  |

Totals : 3.24061e4 3407.83856

Signal 5: DAD1 E, Sig=240,4 Ref=off

| Peak # | RetTime [min] | Type | Width [min] | Area [mAU*s] | Height [mAU] | Area %  |
|--------|---------------|------|-------------|--------------|--------------|---------|
| 1      | 14.557        | BV   | 0.0820      | 777.21985    | 146.28734    | 2.8433  |
| 2      | 17.680        | BB   | 0.0870      | 443.48972    | 79.54295     | 1.6224  |
| 3      | 17.892        | BV   | 0.0741      | 41.77242     | 8.68438      | 0.1528  |
| 4      | 19.493        | BV   | 0.0983      | 559.97467    | 87.88669     | 2.0486  |
| 5      | 20.620        | BV   | 0.1005      | 284.78500    | 43.45454     | 1.0418  |
| 6      | 21.176        | BV   | 0.1018      | 522.82568    | 78.39069     | 1.9127  |
| 7      | 21.316        | VV   | 0.0847      | 117.19544    | 20.48845     | 0.4287  |
| 8      | 21.647        | VV   | 0.1493      | 2.45879e4    | 2672.75610   | 89.9497 |

Totals : 2.73351e4 3137.49114

Signal 6: DAD1 F, Sig=280,16 Ref=off

| Peak # | RetTime [min] | Type | Width [min] | Area [mAU*s] | Height [mAU] | Area %  |
|--------|---------------|------|-------------|--------------|--------------|---------|
| 1      | 14.557        | BB   | 0.0832      | 145.26443    | 26.81715     | 0.7533  |
| 2      | 17.680        | BB   | 0.0876      | 298.43884    | 53.05305     | 1.5477  |
| 3      | 18.031        | VB   | 0.1294      | 108.40925    | 13.84524     | 0.5622  |
| 4      | 19.492        | BV   | 0.1014      | 68.71871     | 10.63372     | 0.3564  |
| 5      | 19.681        | VB   | 0.0961      | 9.85323      | 1.55113      | 0.0511  |
| 6      | 20.620        | VV   | 0.1022      | 184.61534    | 27.53001     | 0.9574  |
| 7      | 21.177        | BV   | 0.1020      | 321.54666    | 48.06583     | 1.6675  |
| 8      | 21.315        | VV   | 0.0823      | 68.22184     | 12.37105     | 0.3538  |
| 9      | 21.646        | VB   | 0.1277      | 1.80780e4    | 2250.99805   | 93.7507 |

Totals : 1.92831e4 2444.86521

Data File C:\Chem32\1\Data\NHC\KGP425\_Concentrated.D  
Sample Name: KGP425\_Concentrated

Signal 7: DAD1 G, Sig=300,16 Ref=off

| Peak # | RetTime [min] | Type | Width [min] | Area [mAU*s] | Height [mAU] | Area %  |
|--------|---------------|------|-------------|--------------|--------------|---------|
| 1      | 14.560        | BB   | 0.1121      | 9.52692      | 1.23345      | 0.1306  |
| 2      | 16.438        | VV   | 0.0964      | 122.05368    | 19.13903     | 1.6736  |
| 3      | 17.680        | BB   | 0.0878      | 107.45611    | 19.05733     | 1.4734  |
| 4      | 18.027        | BV   | 0.1122      | 148.10034    | 19.16150     | 2.0307  |
| 5      | 20.620        | VB   | 0.1110      | 96.67720     | 12.95937     | 1.3256  |
| 6      | 21.180        | BV   | 0.1285      | 141.55328    | 16.11868     | 1.9410  |
| 7      | 21.646        | VV   | 0.1110      | 6667.56348   | 936.89960    | 91.4250 |

Totals : 7292.93101 1024.56897

Signal 8: DAD1 H, Sig=320,16 Ref=off

| Peak # | RetTime [min] | Type | Width [min] | Area [mAU*s] | Height [mAU] | Area %  |
|--------|---------------|------|-------------|--------------|--------------|---------|
| 1      | 15.163        | BV   | 0.0767      | 9.68951      | 1.99357      | 1.6498  |
| 2      | 15.377        | VB   | 0.1018      | 14.73561     | 2.15531      | 2.5090  |
| 3      | 16.021        | BV   | 0.0919      | 6.27725      | 1.01919      | 1.0688  |
| 4      | 16.241        | VV   | 0.0823      | 11.66878     | 2.18467      | 1.9868  |
| 5      | 16.433        | VB   | 0.0878      | 60.74028     | 10.76672     | 10.3421 |
| 6      | 17.681        | BB   | 0.0832      | 6.50484      | 1.23932      | 1.1076  |
| 7      | 18.025        | BV   | 0.1051      | 153.84769    | 21.60467     | 26.1953 |
| 8      | 18.406        | VB   | 0.0922      | 58.86423     | 9.77991      | 10.0227 |
| 9      | 18.741        | BB   | 0.0978      | 10.26478     | 1.62227      | 1.7478  |
| 10     | 19.483        | BB   | 0.1199      | 8.38881      | 1.02103      | 1.4283  |
| 11     | 21.235        | BV   | 0.1326      | 19.49195     | 2.17432      | 3.3188  |
| 12     | 21.646        | VV   | 0.1198      | 226.83722    | 28.82724     | 38.6230 |

Totals : 587.31093 84.38821

=====  
\*\*\* End of Report \*\*\*

**10. 1-((tert-butyldimethylsilyl)oxy)-2-methoxy-5-(3,4,5-trimethoxyphenyl)-6,7,8,9-tetrahydro-5H-benzo[7]annulene-5,6-diol**

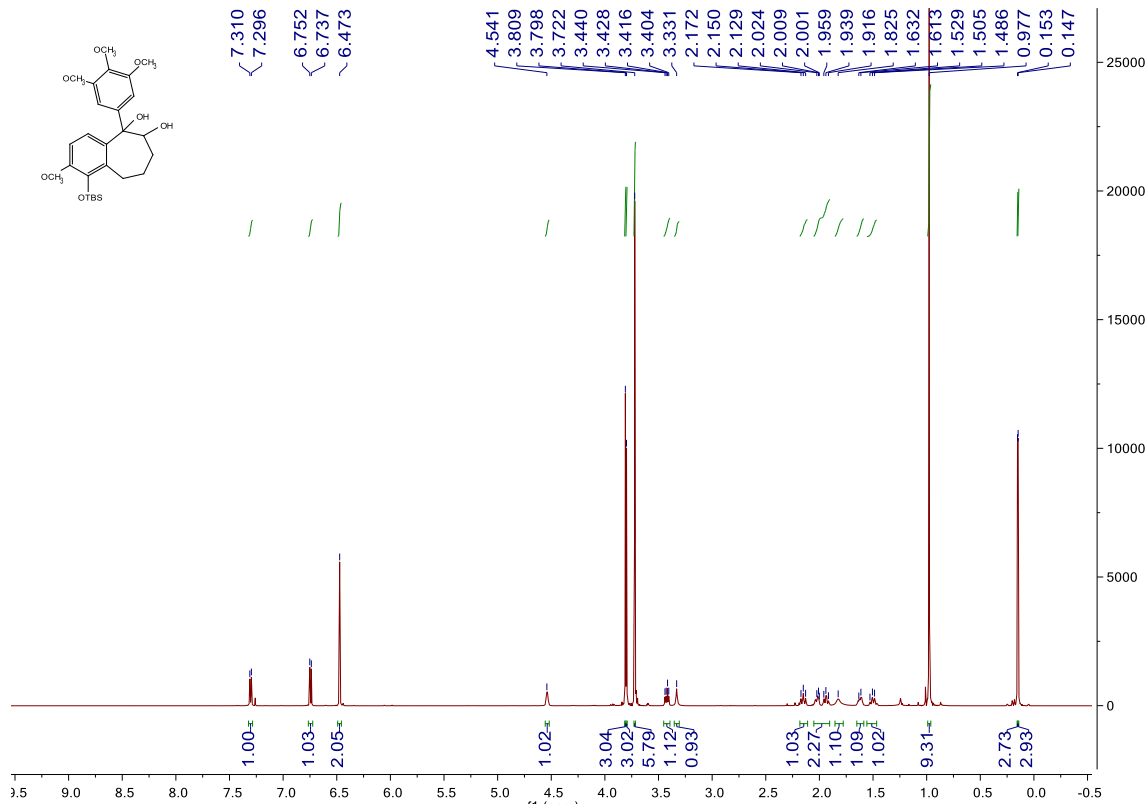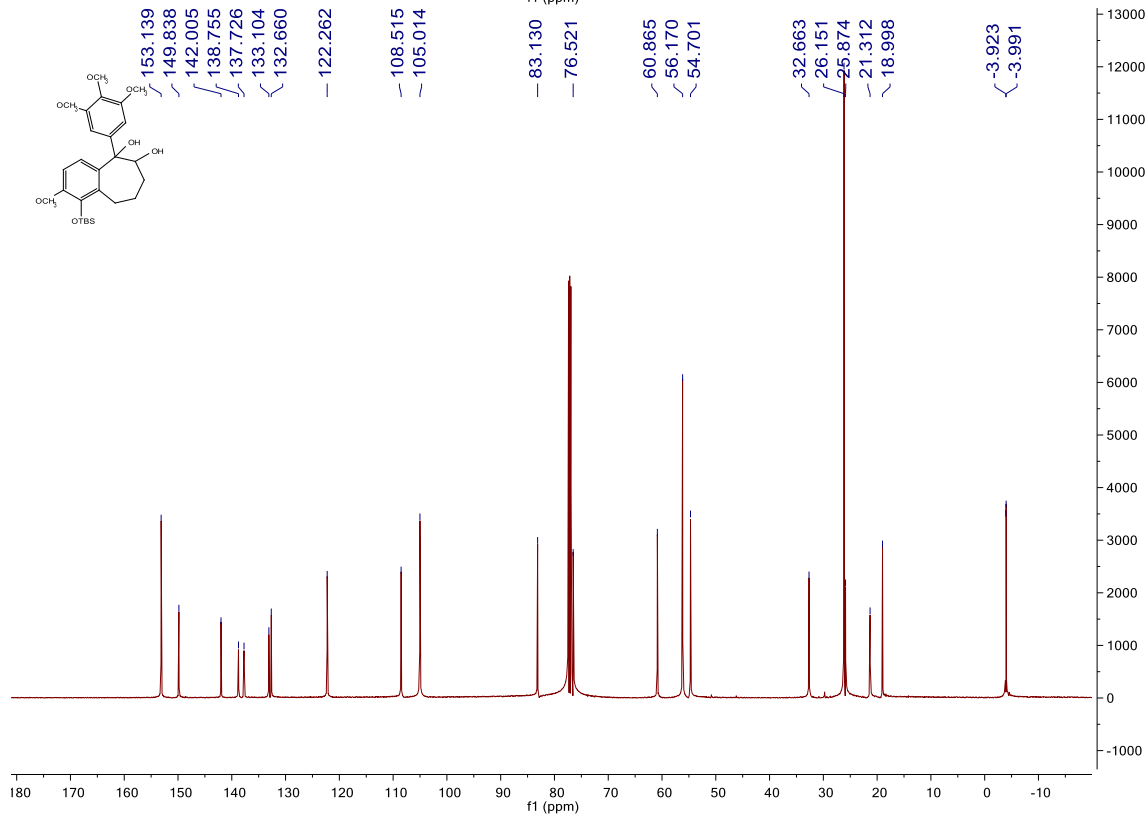

11. 2-((3-Methoxy-9-(3,4,5-trimethoxyphenyl)-6,7-dihydro-5H-benzo [7] annulen-4-yl) oxy)ethan-1-ol

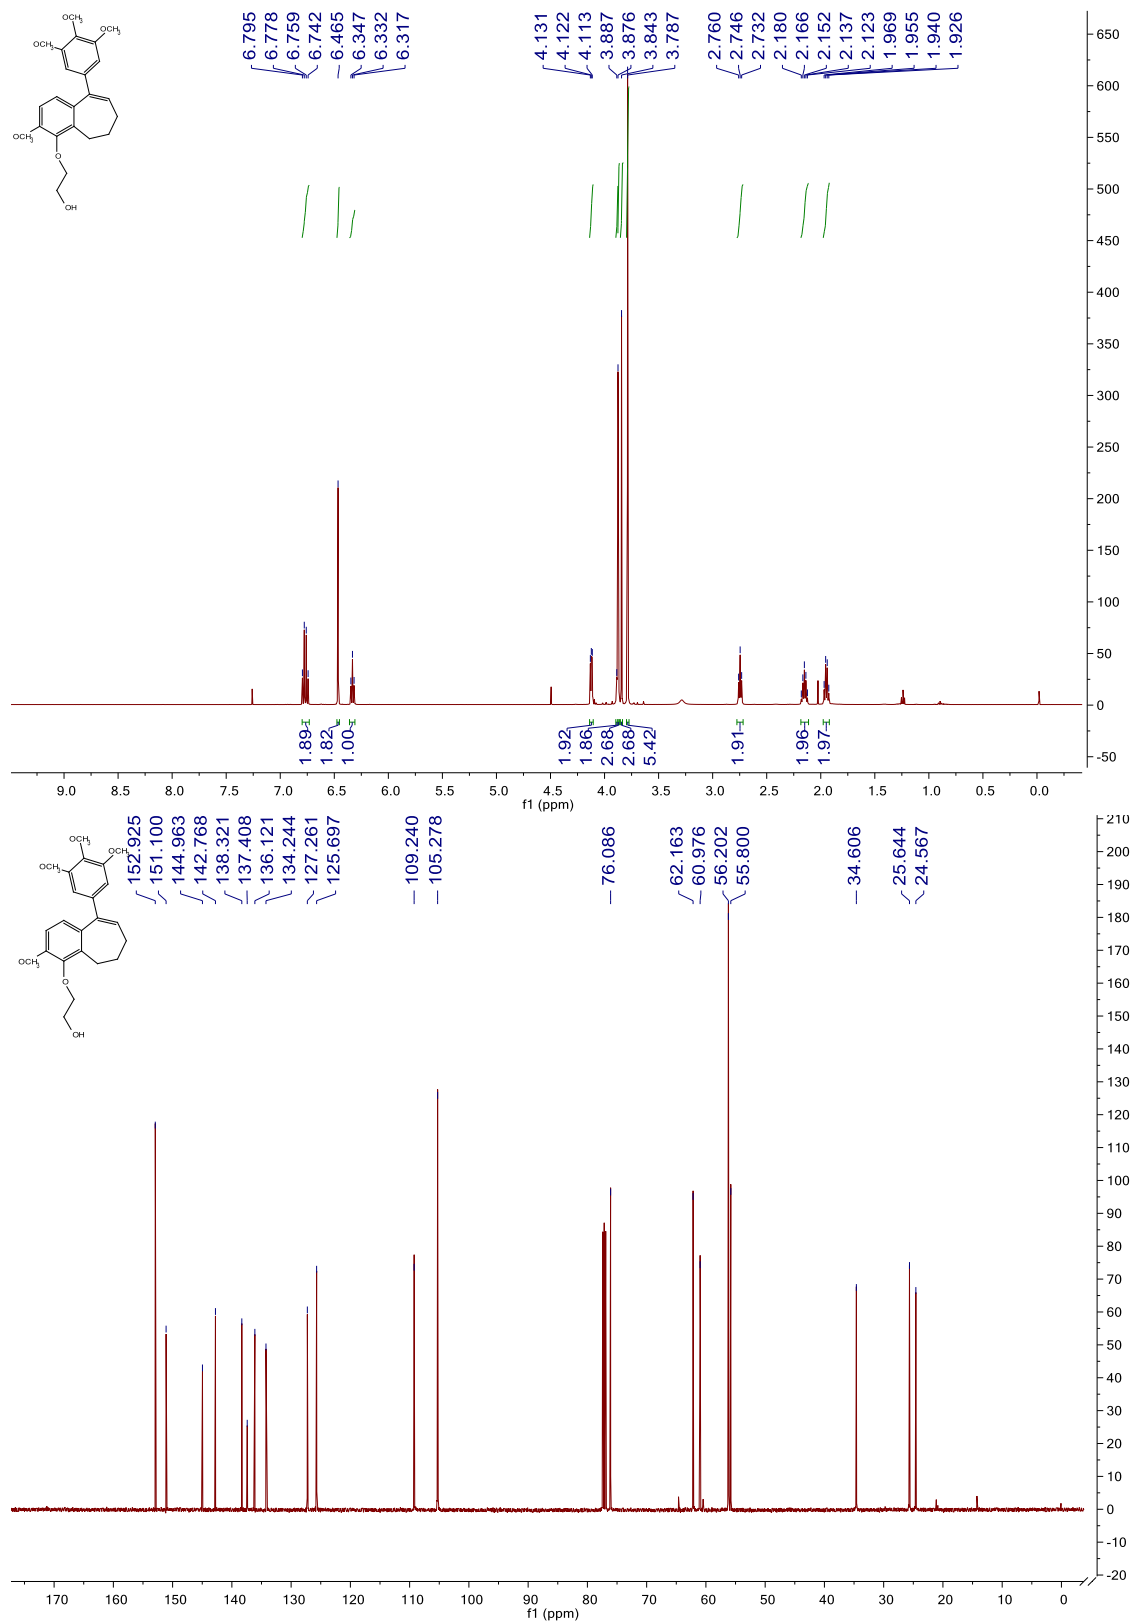

NHC\_1\_141\_03Sept2014 #500 RT: 4.38 AV: 1 NL: 1.79E7  
T: FTMS + p ESI Full ms [250.00-800.00]

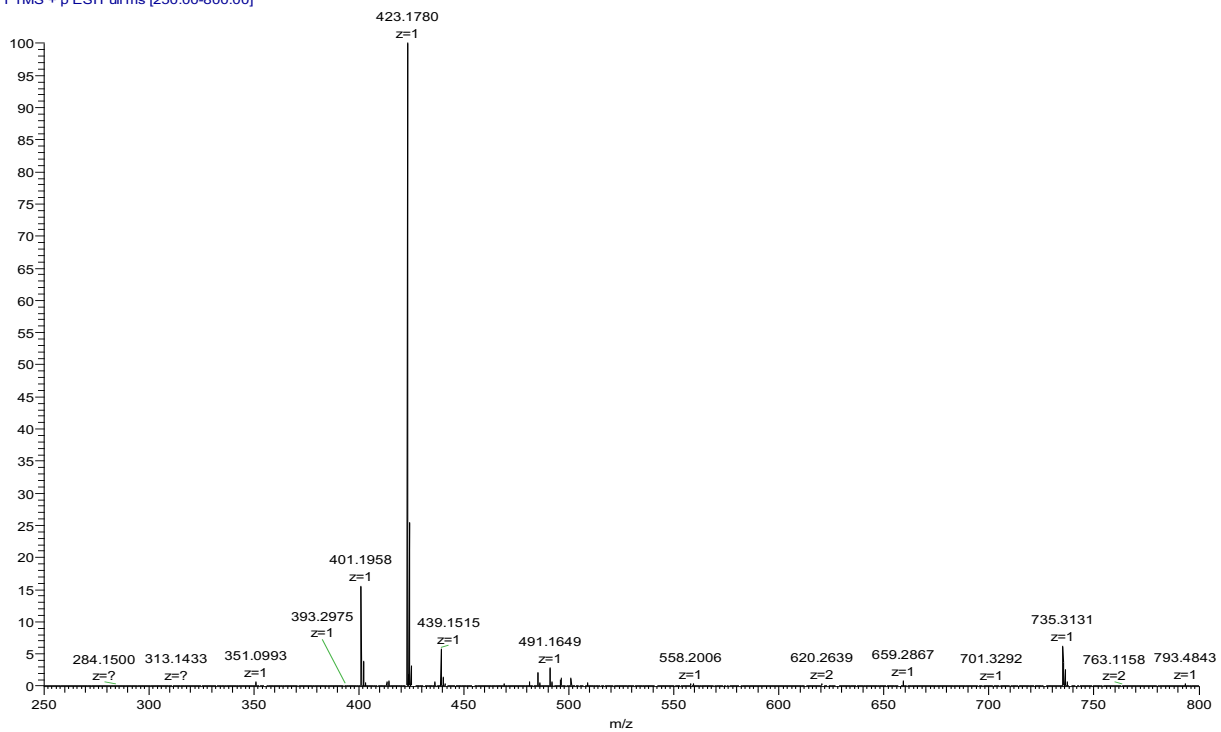

Data File C:\CHEM32\1\DATA\HAICHAN NIU\KGP426\_RUN00001.D  
Sample Name: KGP426

=====  
Acq. Operator : Haichan Niu  
Acq. Instrument : Instrument 1 Location : -  
Injection Date : 9/3/2014 6:12:26 PM  
Acq. Method : C:\CHEM32\1\METHODS\MASTERMETHOD.M  
Last changed : 9/3/2014 6:06:43 PM by Haichan Niu  
Analysis Method : C:\CHEM32\1\DATA\HAICHAN NIU\KGP426\_RUN00001.D\DA.M (MASTERMETHOD.M)  
Last changed : 9/3/2014 7:09:19 PM by Haichan Niu  
Sample Info : KGP426

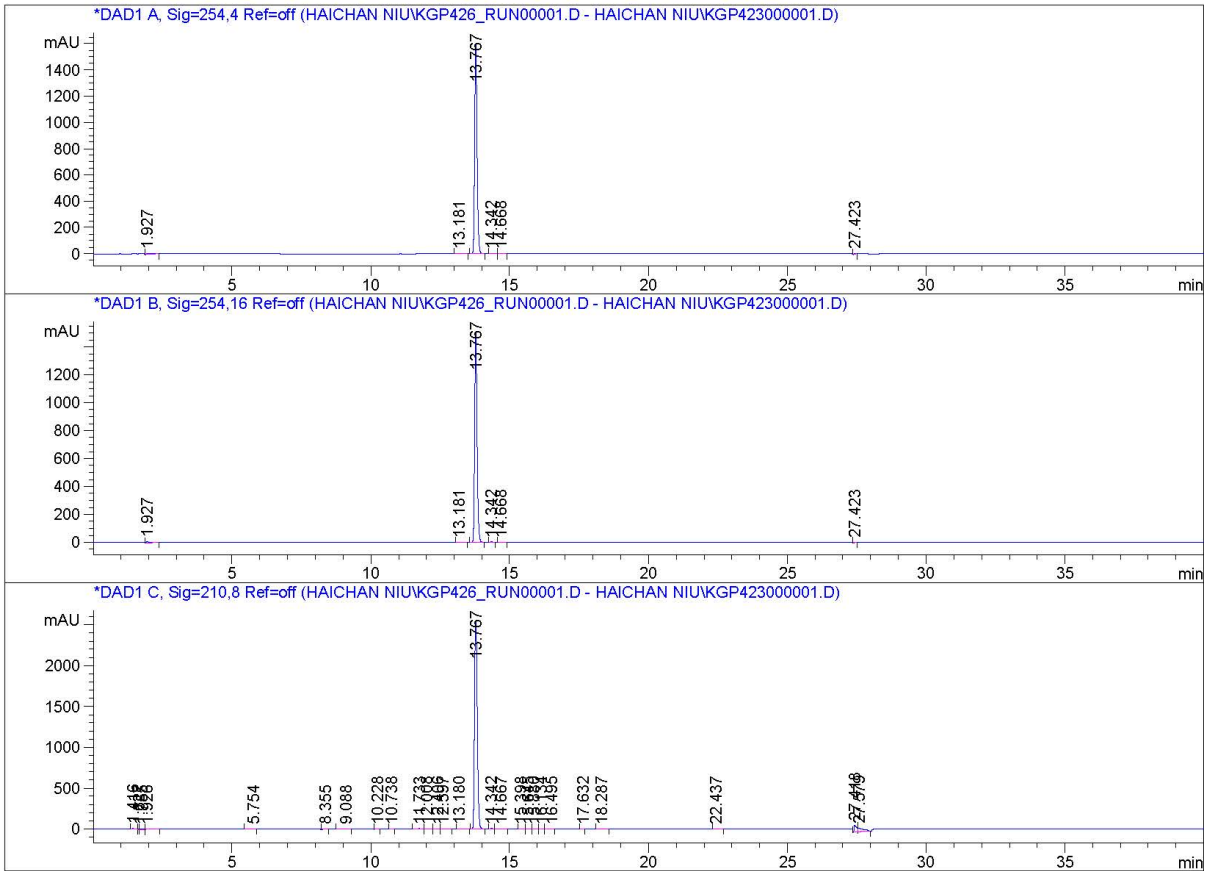



Data File C:\CHEM32\1\DATA\HAICHAN NIU\KGP426\_RUN00001.D  
Sample Name: KGP426

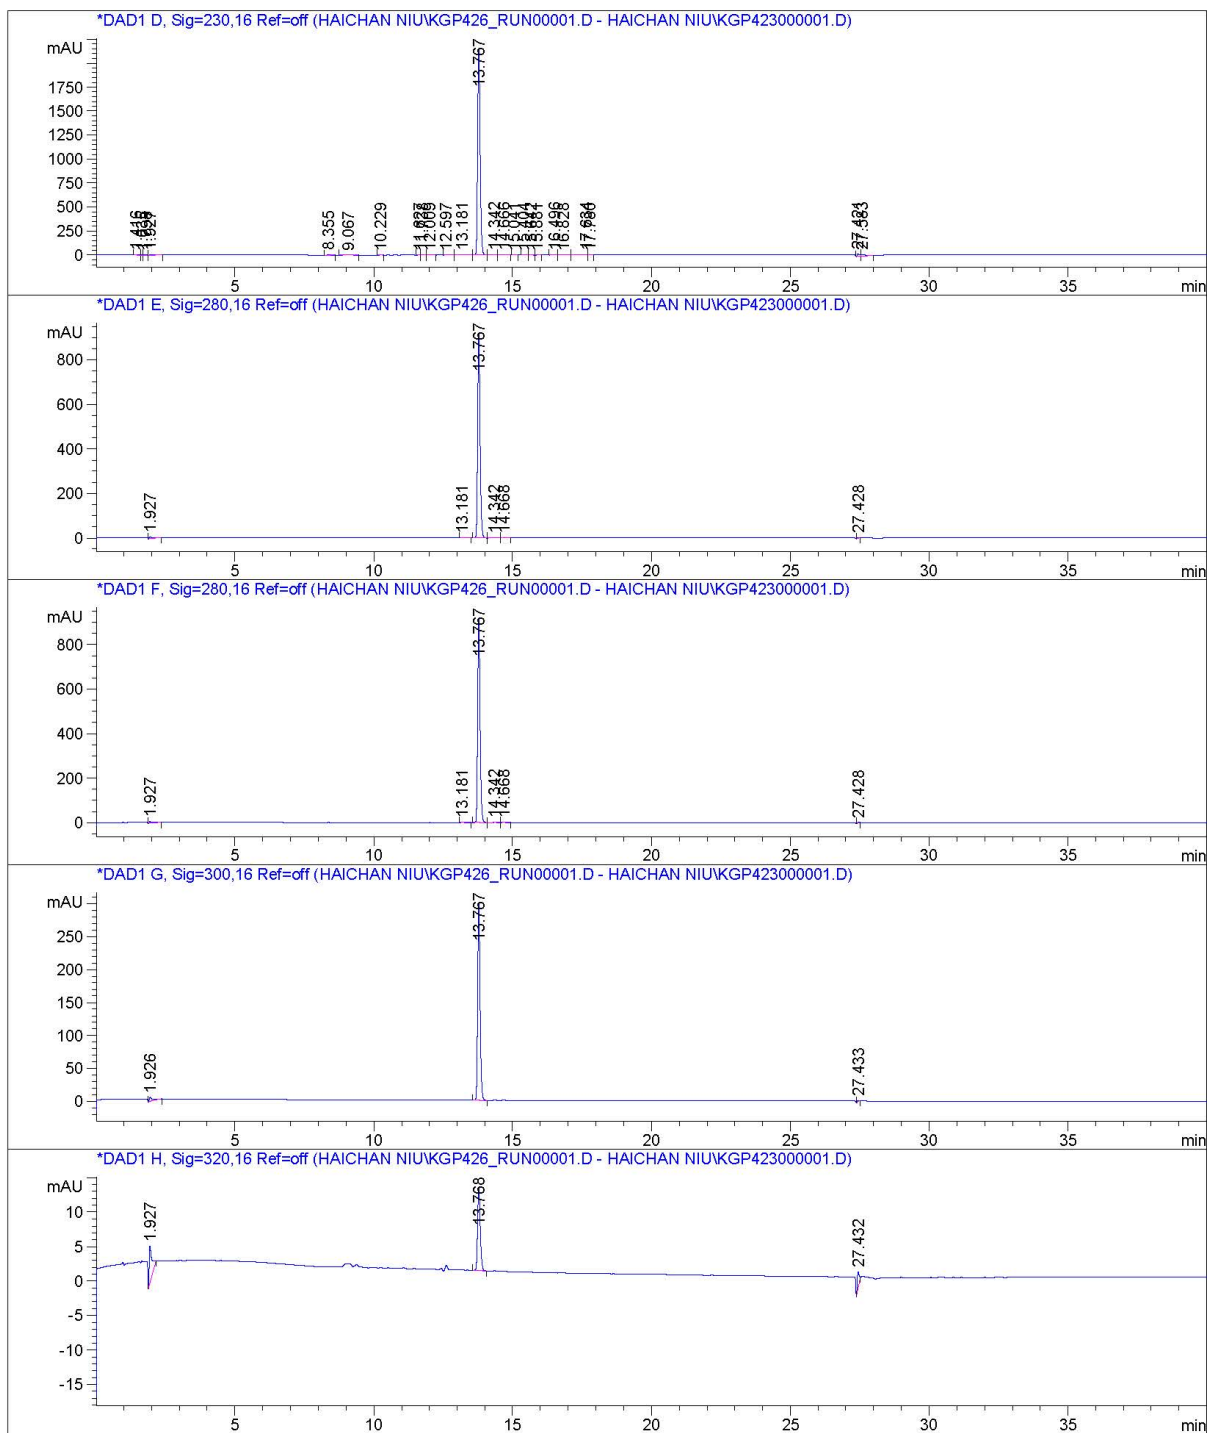

=====  
Area Percent Report  
=====

Sorted By : Signal  
Multiplier : 1.0000  
Dilution : 1.0000  
Use Multiplier & Dilution Factor with ISTDs

Signal 1: DAD1 A, Sig=254,4 Ref=off  
Signal has been modified after loading from rawdata file!

| Peak # | RetTime [min] | Type | Width [min] | Area [mAU*s] | Height [mAU] | Area %  |
|--------|---------------|------|-------------|--------------|--------------|---------|
| 1      | 1.927         | BB   | 0.1399      | 119.08279    | 11.21637     | 1.2223  |
| 2      | 13.181        | BB   | 0.0907      | 15.13886     | 2.57139      | 0.1554  |
| 3      | 13.767        | BB   | 0.0917      | 9554.34863   | 1600.01831   | 98.0718 |
| 4      | 14.342        | BV   | 0.0924      | 15.24520     | 2.52756      | 0.1565  |
| 5      | 14.668        | VB   | 0.0911      | 10.52975     | 1.77820      | 0.1081  |
| 6      | 27.423        | BB   | 0.0724      | 27.84886     | 5.97433      | 0.2859  |

Totals : 9742.19410 1624.08617

Signal 2: DAD1 B, Sig=254,16 Ref=off  
Signal has been modified after loading from rawdata file!

| Peak # | RetTime [min] | Type | Width [min] | Area [mAU*s] | Height [mAU] | Area %  |
|--------|---------------|------|-------------|--------------|--------------|---------|
| 1      | 1.927         | BB   | 0.1399      | 116.74947    | 10.99203     | 1.2738  |
| 2      | 13.181        | BB   | 0.0899      | 13.98029     | 2.40313      | 0.1525  |
| 3      | 13.767        | BB   | 0.0916      | 8982.48633   | 1506.09546   | 98.0063 |
| 4      | 14.342        | BB   | 0.0898      | 14.18266     | 2.43999      | 0.1547  |
| 5      | 14.668        | BB   | 0.0894      | 10.05478     | 1.74013      | 0.1097  |
| 6      | 27.423        | BB   | 0.0707      | 27.76368     | 5.92610      | 0.3029  |

Totals : 9165.21722 1529.59684

Signal 3: DAD1 C, Sig=210,8 Ref=off  
Signal has been modified after loading from rawdata file!

| Peak # | RetTime [min] | Type | Width [min] | Area [mAU*s] | Height [mAU] | Area % |
|--------|---------------|------|-------------|--------------|--------------|--------|
| 1      | 1.416         | BV   | 0.0834      | 65.84866     | 11.07412     | 0.3348 |
| 2      | 1.627         | VV   | 0.0580      | 17.29334     | 4.38142      | 0.0879 |
| 3      | 1.755         | VB   | 0.1483      | 68.88960     | 6.57415      | 0.3502 |

Data File C:\CHEM32\1\DATA\HAICHAN NIU\KGP426\_RUN00001.D  
 Sample Name: KGP426

| Peak # | RetTime [min] | Type | Width [min] | Area [mAU*s] | Height [mAU] | Area %  |
|--------|---------------|------|-------------|--------------|--------------|---------|
| 4      | 1.926         | BB   | 0.1418      | 139.05045    | 12.89657     | 0.7069  |
| 5      | 5.754         | BB   | 0.1811      | 17.70824     | 1.29856      | 0.0900  |
| 6      | 8.355         | BB   | 0.1001      | 39.84661     | 5.66208      | 0.2026  |
| 7      | 9.088         | BB   | 0.2386      | 39.77609     | 2.36085      | 0.2022  |
| 8      | 10.228        | BB   | 0.0984      | 16.11083     | 2.39876      | 0.0819  |
| 9      | 10.738        | BB   | 0.0795      | 5.32537      | 1.04401      | 0.0271  |
| 10     | 11.733        | BV   | 0.1327      | 73.00882     | 7.56023      | 0.3712  |
| 11     | 12.008        | VV   | 0.1427      | 27.33658     | 2.64206      | 0.1390  |
| 12     | 12.406        | VB   | 0.1362      | 13.80634     | 1.48814      | 0.0702  |
| 13     | 12.597        | BB   | 0.1172      | 28.09263     | 3.44285      | 0.1428  |
| 14     | 13.180        | VB   | 0.0942      | 37.12927     | 5.99732      | 0.1888  |
| 15     | 13.767        | BB   | 0.1105      | 1.75956e4    | 2550.63257   | 89.4515 |
| 16     | 14.342        | BV   | 0.0915      | 42.31578     | 7.10271      | 0.2151  |
| 17     | 14.667        | VB   | 0.1060      | 40.25458     | 5.59206      | 0.2046  |
| 18     | 15.398        | BV   | 0.1493      | 13.49356     | 1.23675      | 0.0686  |
| 19     | 15.645        | VB   | 0.1455      | 22.55037     | 2.16622      | 0.1146  |
| 20     | 15.880        | BV   | 0.1142      | 20.79329     | 2.62974      | 0.1057  |
| 21     | 16.134        | VB   | 0.1260      | 11.85367     | 1.44059      | 0.0603  |
| 22     | 16.495        | BB   | 0.1390      | 10.29406     | 1.06285      | 0.0523  |
| 23     | 17.632        | BV   | 0.1006      | 6.64764      | 1.06805      | 0.0338  |
| 24     | 18.287        | VB   | 0.1628      | 16.01570     | 1.27240      | 0.0814  |
| 25     | 22.437        | BB   | 0.0952      | 6.90384      | 1.07153      | 0.0351  |
| 26     | 27.418        | BV   | 0.0927      | 606.74664    | 89.93950     | 3.0845  |
| 27     | 27.579        | VB   | 0.1775      | 687.85321    | 49.07451     | 3.4969  |

Totals : 1.96706e4 2783.11060

Signal 4: DAD1 D, Sig=230,16 Ref=off  
 Signal has been modified after loading from rawdata file!

| Peak # | RetTime [min] | Type | Width [min] | Area [mAU*s] | Height [mAU] | Area %  |
|--------|---------------|------|-------------|--------------|--------------|---------|
| 1      | 1.416         | BV   | 0.1653      | 37.19662     | 2.86874      | 0.2580  |
| 2      | 1.635         | VV   | 0.0652      | 22.79852     | 4.81536      | 0.1581  |
| 3      | 1.798         | VB   | 0.1576      | 68.77133     | 7.18661      | 0.4770  |
| 4      | 1.927         | BB   | 0.1435      | 139.15787    | 12.73060     | 0.9651  |
| 5      | 8.355         | BB   | 0.1186      | 40.33474     | 4.67800      | 0.2797  |
| 6      | 9.067         | BB   | 0.2603      | 28.87039     | 1.40194      | 0.2002  |
| 7      | 10.229        | BB   | 0.0984      | 12.34820     | 1.79232      | 0.0856  |
| 8      | 11.627        | BV   | 0.0863      | 11.15424     | 1.96349      | 0.0774  |
| 9      | 11.738        | VB   | 0.0937      | 15.51431     | 2.45737      | 0.1076  |
| 10     | 12.009        | BB   | 0.1116      | 11.38201     | 1.48170      | 0.0789  |
| 11     | 12.597        | BV   | 0.1349      | 18.07800     | 1.86829      | 0.1254  |
| 12     | 13.181        | VV   | 0.1324      | 39.49321     | 4.17227      | 0.2739  |
| 13     | 13.767        | VV   | 0.0964      | 1.33474e4    | 2152.10620   | 92.5726 |
| 14     | 14.342        | VV   | 0.1229      | 45.72311     | 5.28717      | 0.3171  |
| 15     | 14.666        | VB   | 0.1413      | 37.98609     | 3.71501      | 0.2635  |

Data File C:\CHEM32\1\DATA\HAICHAN NIU\KGP426\_RUN00001.D  
Sample Name: KGP426

| Peak # | RetTime [min] | Type | Width [min] | Area [mAU*s] | Height [mAU] | Area % |
|--------|---------------|------|-------------|--------------|--------------|--------|
| 16     | 15.041        | BB   | 0.0977      | 7.02311      | 1.11142      | 0.0487 |
| 17     | 15.404        | BV   | 0.1193      | 18.64751     | 2.23519      | 0.1293 |
| 18     | 15.642        | VB   | 0.1470      | 17.07045     | 1.61935      | 0.1184 |
| 19     | 15.881        | BB   | 0.0921      | 9.88751      | 1.64665      | 0.0686 |
| 20     | 16.496        | BV   | 0.1112      | 21.94571     | 2.93456      | 0.1522 |
| 21     | 16.828        | VB   | 0.1681      | 15.91745     | 1.34426      | 0.1104 |
| 22     | 17.634        | BV   | 0.1519      | 24.40948     | 2.29782      | 0.1693 |
| 23     | 17.780        | VB   | 0.0980      | 11.49500     | 1.76567      | 0.0797 |
| 24     | 27.421        | BV   | 0.0966      | 199.37985    | 28.85666     | 1.3828 |
| 25     | 27.583        | VB   | 0.1811      | 216.32021    | 15.28291     | 1.5003 |

Totals : 1.44183e4 2267.61955

Signal 5: DAD1 E, Sig=280,16 Ref=off  
Signal has been modified after loading from rawdata file!

| Peak # | RetTime [min] | Type | Width [min] | Area [mAU*s] | Height [mAU] | Area %  |
|--------|---------------|------|-------------|--------------|--------------|---------|
| 1      | 1.927         | BB   | 0.1375      | 88.82256     | 8.52890      | 1.5777  |
| 2      | 13.181        | BB   | 0.0876      | 8.21066      | 1.45974      | 0.1458  |
| 3      | 13.767        | BB   | 0.0915      | 5475.32520   | 918.99084    | 97.2568 |
| 4      | 14.342        | BV   | 0.1586      | 27.22835     | 2.32613      | 0.4837  |
| 5      | 14.668        | VB   | 0.1104      | 13.70090     | 1.80886      | 0.2434  |
| 6      | 27.428        | BB   | 0.0691      | 16.47407     | 3.61662      | 0.2926  |

Totals : 5629.76173 936.73110

Signal 6: DAD1 F, Sig=280,16 Ref=off  
Signal has been modified after loading from rawdata file!

| Peak # | RetTime [min] | Type | Width [min] | Area [mAU*s] | Height [mAU] | Area %  |
|--------|---------------|------|-------------|--------------|--------------|---------|
| 1      | 1.927         | BB   | 0.1375      | 88.82256     | 8.52890      | 1.5777  |
| 2      | 13.181        | BB   | 0.0876      | 8.21066      | 1.45974      | 0.1458  |
| 3      | 13.767        | BB   | 0.0915      | 5475.32520   | 918.99084    | 97.2568 |
| 4      | 14.342        | BV   | 0.1586      | 27.22835     | 2.32613      | 0.4837  |
| 5      | 14.668        | VB   | 0.1104      | 13.70090     | 1.80886      | 0.2434  |
| 6      | 27.428        | BB   | 0.0691      | 16.47407     | 3.61662      | 0.2926  |

Totals : 5629.76173 936.73110

Data File C:\CHEM32\1\DATA\HAICHAN NIU\KGP426\_RUN00001.D  
Sample Name: KGP426

Signal 7: DAD1 G, Sig=300,16 Ref=off  
Signal has been modified after loading from rawdata file!

| Peak # | RetTime [min] | Type | Width [min] | Area [mAU*s] | Height [mAU] | Area %  |
|--------|---------------|------|-------------|--------------|--------------|---------|
| 1      | 1.926         | BB   | 0.1434      | 71.31882     | 6.53171      | 3.7804  |
| 2      | 13.767        | BB   | 0.0920      | 1802.34485   | 300.41882    | 95.5382 |
| 3      | 27.433        | BB   | 0.0723      | 12.85422     | 2.76376      | 0.6814  |

Totals :                    1886.51788   309.71429

Signal 8: DAD1 H, Sig=320,16 Ref=off  
Signal has been modified after loading from rawdata file!

| Peak # | RetTime [min] | Type | Width [min] | Area [mAU*s] | Height [mAU] | Area %  |
|--------|---------------|------|-------------|--------------|--------------|---------|
| 1      | 1.927         | BB   | 0.0977      | 38.60722     | 5.51177      | 29.5498 |
| 2      | 13.768        | BB   | 0.1017      | 80.45616     | 12.08332     | 61.5808 |
| 3      | 27.432        | BB   | 0.0735      | 11.58810     | 2.43776      | 8.8695  |

Totals :                    130.65147   20.03285

=====  
\*\*\* End of Report \*\*\*

13. 8-bromo-3-methoxy-9-(3,4,5-trimethoxyphenyl)-6,7-dihydro-5H-benzo[7]annulen-4-ol

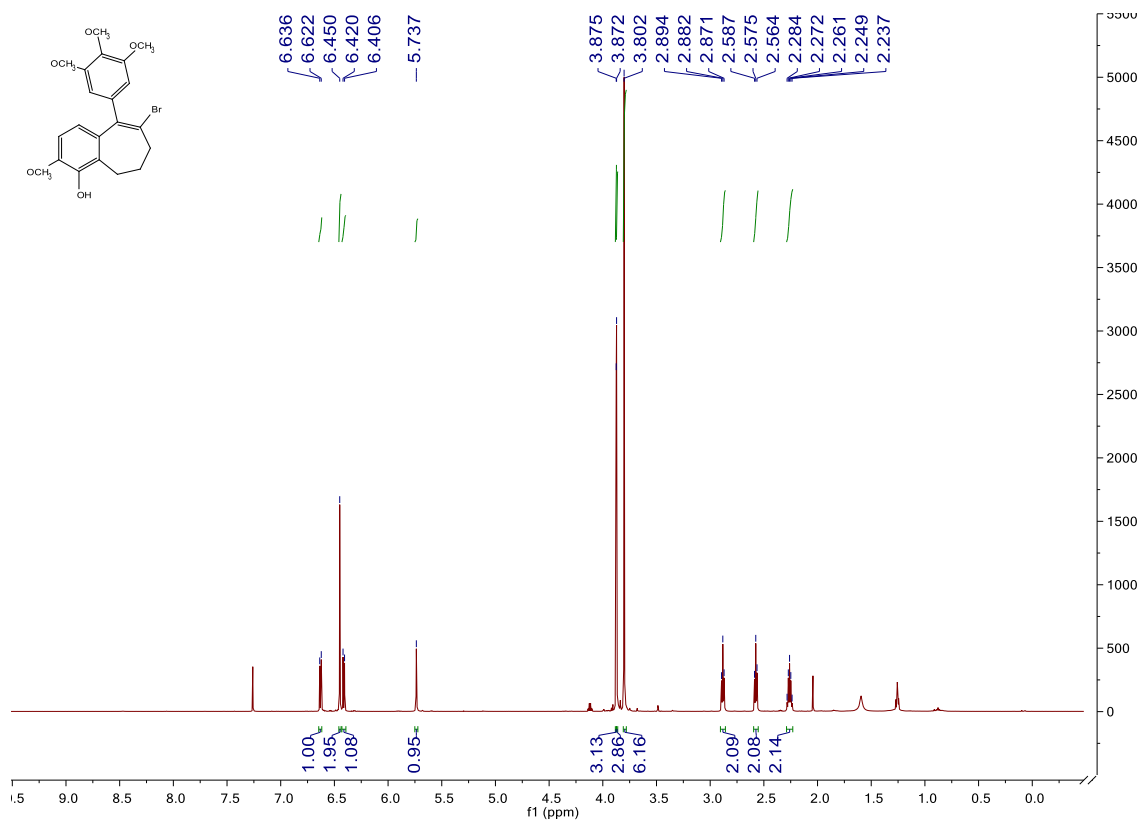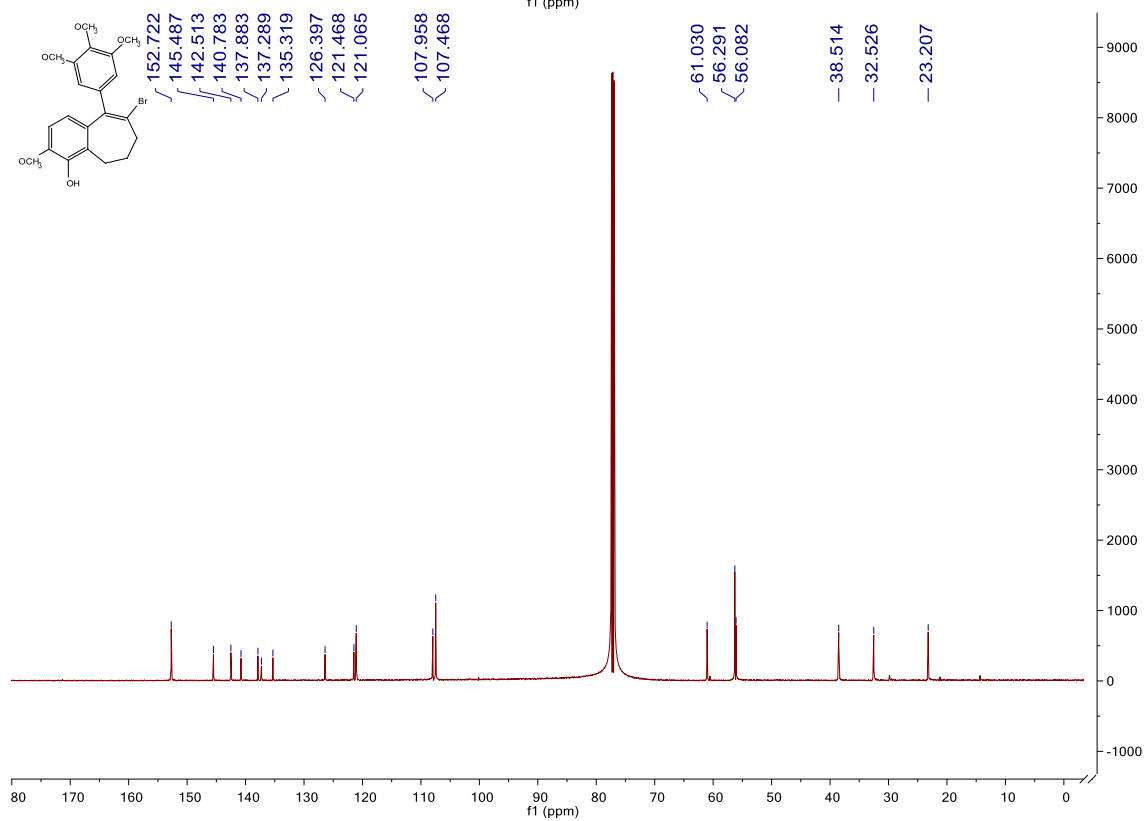

NHC\_5\_41\_+ESI#2-19 RT: 0.01-0.15 AV: 18 NL: 1.79E7  
T: FTMS + p ESI Full ms [200.00-800.00]

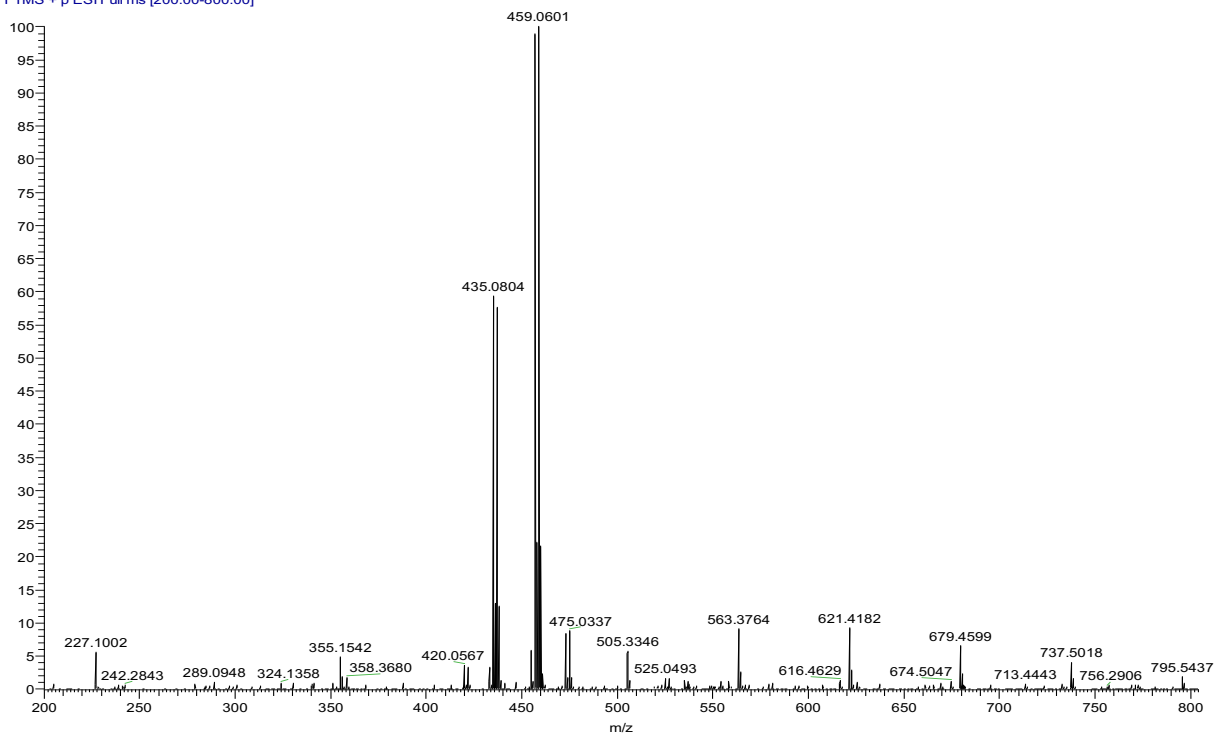





Data File C:\Chem32\1\Data\NHC\NHC\_5\_45\_sample.D  
 Sample Name: NHC\_5\_45\_sample

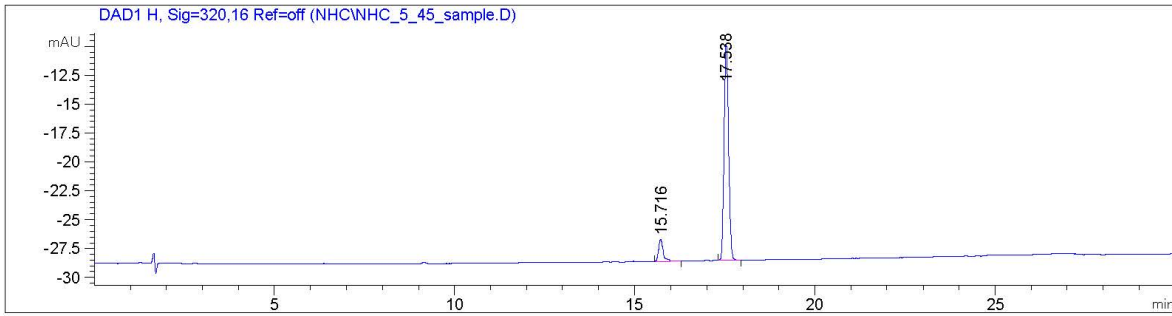

=====  
 Area Percent Report  
 =====

Sorted By : Signal  
 Multiplier : 1.0000  
 Dilution : 1.0000  
 Use Multiplier & Dilution Factor with ISTDs

Signal 1: DAD1 A, Sig=254,4 Ref=off

| Peak # | RetTime [min] | Type | Width [min] | Area [mAU*s] | Height [mAU] | Area %  |
|--------|---------------|------|-------------|--------------|--------------|---------|
| 1      | 15.716        | BB   | 0.1128      | 35.66437     | 5.02612      | 1.7540  |
| 2      | 16.984        | BB   | 0.1245      | 8.29816      | 1.02467      | 0.4081  |
| 3      | 17.538        | BB   | 0.1301      | 1989.40491   | 236.56825    | 97.8379 |

Totals : 2033.36744 242.61904

Signal 2: DAD1 C, Sig=210,8 Ref=off

| Peak # | RetTime [min] | Type | Width [min] | Area [mAU*s] | Height [mAU] | Area %  |
|--------|---------------|------|-------------|--------------|--------------|---------|
| 1      | 2.758         | BB   | 0.3239      | 69.77796     | 2.67886      | 1.0142  |
| 2      | 6.265         | BB   | 0.1188      | 11.20396     | 1.37936      | 0.1628  |
| 3      | 15.716        | BB   | 0.1295      | 146.68288    | 17.20089     | 2.1320  |
| 4      | 16.983        | BB   | 0.1244      | 23.06185     | 2.91277      | 0.3352  |
| 5      | 17.538        | BV   | 0.1306      | 6568.02832   | 777.53577    | 95.4654 |
| 6      | 20.302        | BB   | 0.2160      | 45.81881     | 3.18187      | 0.6660  |
| 7      | 24.869        | VB   | 0.1590      | 15.43766     | 1.39669      | 0.2244  |

Totals : 6880.01143 806.28621

Data File C:\Chem32\1\Data\NHC\NHC\_5\_45\_sample.D  
Sample Name: NHC\_5\_45\_sample

Signal 3: DAD1 E, Sig=280,16 Ref=off

| Peak #   | RetTime [min] | Type | Width [min] | Area [mAU*s] | Height [mAU] | Area %  |
|----------|---------------|------|-------------|--------------|--------------|---------|
| 1        | 15.716        | BB   | 0.1294      | 26.30809     | 3.08786      | 1.5247  |
| 2        | 17.538        | BB   | 0.1301      | 1699.19666   | 202.04190    | 98.4753 |
| Totals : |               |      |             | 1725.50475   | 205.12976    |         |

Signal 4: DAD1 G, Sig=300,16 Ref=off

| Peak #   | RetTime [min] | Type | Width [min] | Area [mAU*s] | Height [mAU] | Area %  |
|----------|---------------|------|-------------|--------------|--------------|---------|
| 1        | 15.716        | BB   | 0.1266      | 26.65558     | 3.21928      | 2.4140  |
| 2        | 17.538        | BB   | 0.1302      | 1077.56128   | 128.05251    | 97.5860 |
| Totals : |               |      |             | 1104.21686   | 131.27178    |         |

Signal 5: DAD1 H, Sig=320,16 Ref=off

| Peak #   | RetTime [min] | Type | Width [min] | Area [mAU*s] | Height [mAU] | Area %  |
|----------|---------------|------|-------------|--------------|--------------|---------|
| 1        | 15.716        | BB   | 0.1324      | 16.67204     | 1.90032      | 9.5029  |
| 2        | 17.538        | BB   | 0.1310      | 158.76990    | 18.70619     | 90.4971 |
| Totals : |               |      |             | 175.44194    | 20.60651     |         |

=====  
\*\*\* End of Report \*\*\*

### 14. 8-Bromo-3-methoxy-4-methyl-9-(3,4,5-trimethoxyphenyl)-6,7-dihydro-5H-benzo[7]annulene

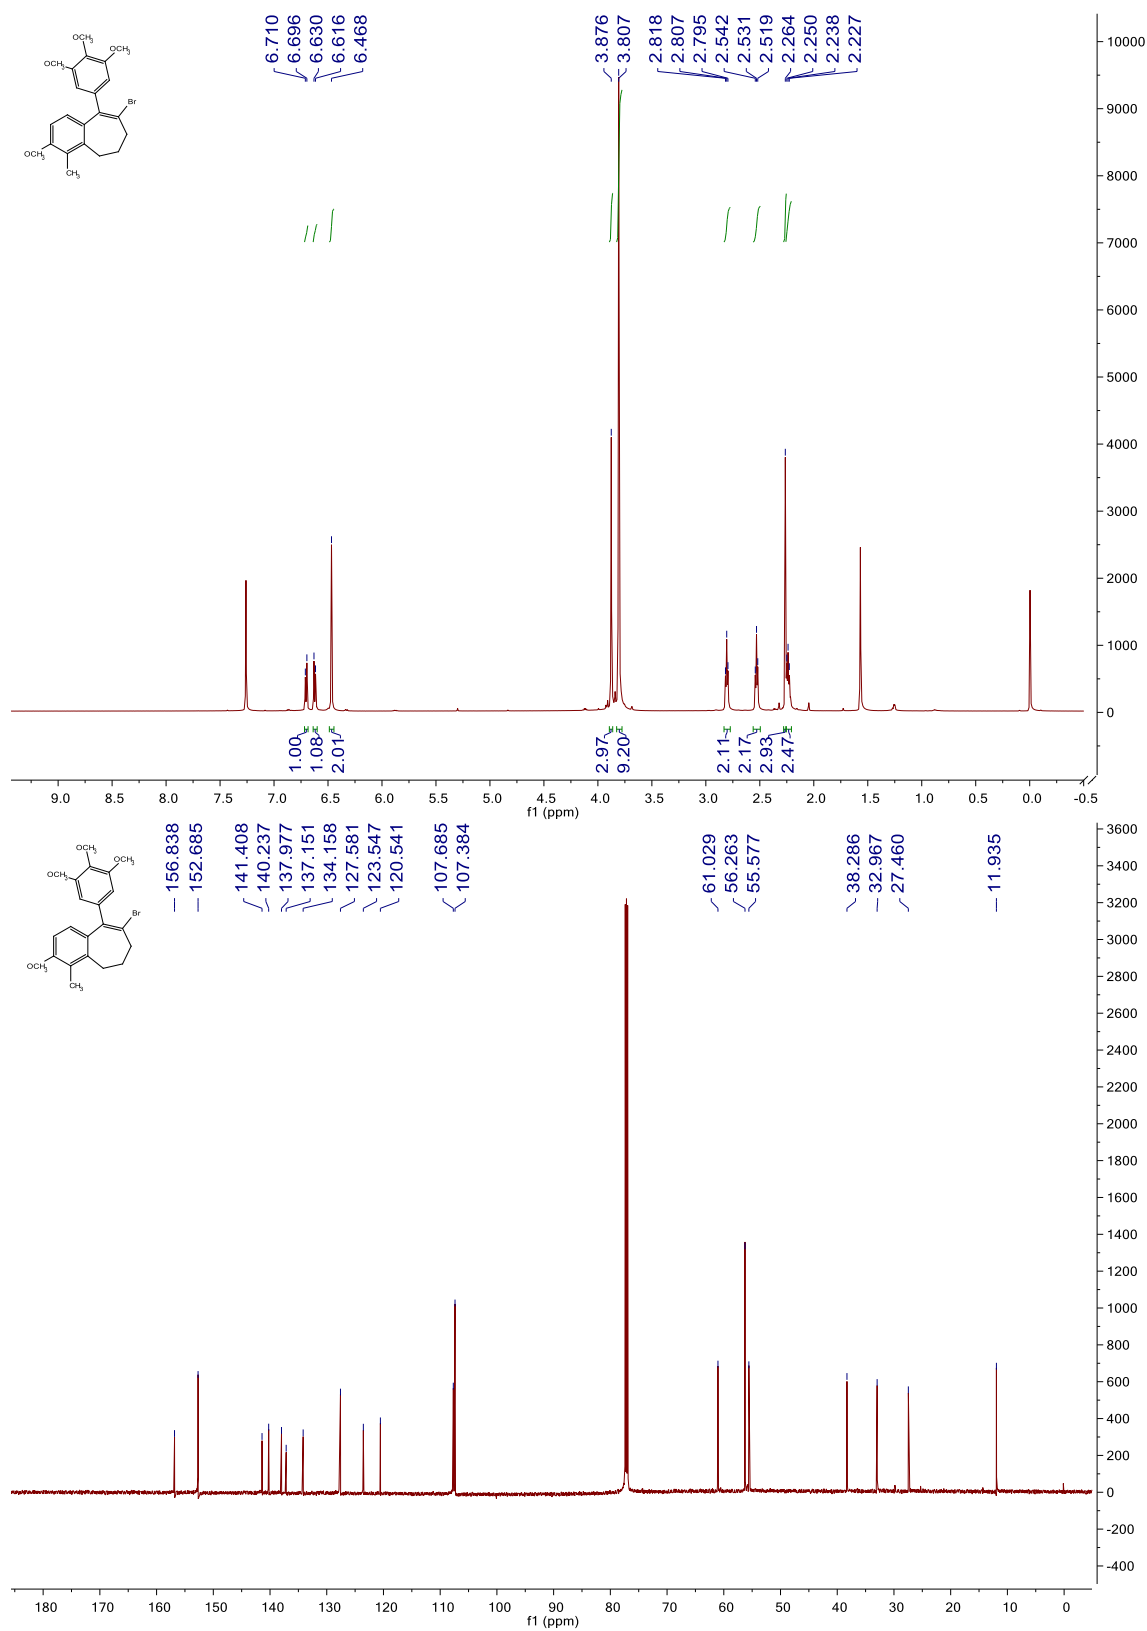

NHC\_1\_153\_Orbi\_+ESI #500 RT: 4.90 AV: 1 NL: 3.70E6  
 T: FTMS + p ESI Full ms [200.00-800.00]

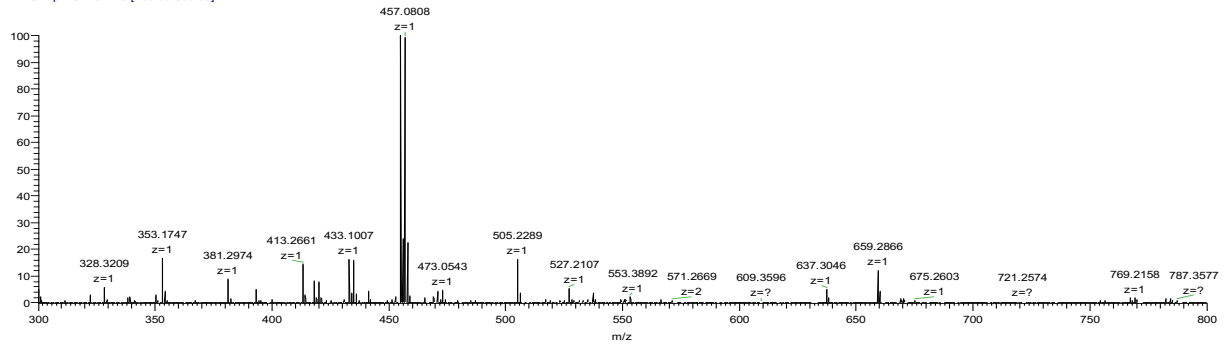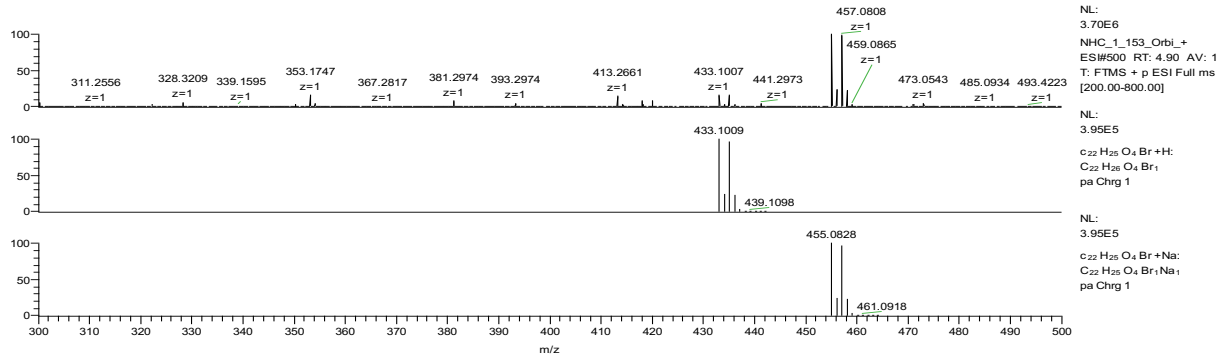

Data File C:\CHEM32\1\DATA\HAICHAN NIU\KGP432PURE00002.D  
Sample Name: KGP432PURE

=====  
Acq. Operator : HAICHAN NIU  
Acq. Instrument : Instrument 1 Location : -  
Injection Date : 12/17/2014 11:14:21 AM  
Acq. Method : C:\CHEM32\1\METHODS\MASTERMETHOD.M  
Last changed : 12/17/2014 11:09:46 AM by HAICHAN NIU  
Analysis Method : C:\CHEM32\1\DATA\HAICHAN NIU\KGP432PURE00002.D\DA.M (MASTERMETHOD.M)  
Last changed : 12/17/2014 12:07:43 PM by HAICHAN NIU  
Sample Info : KGP432PURE

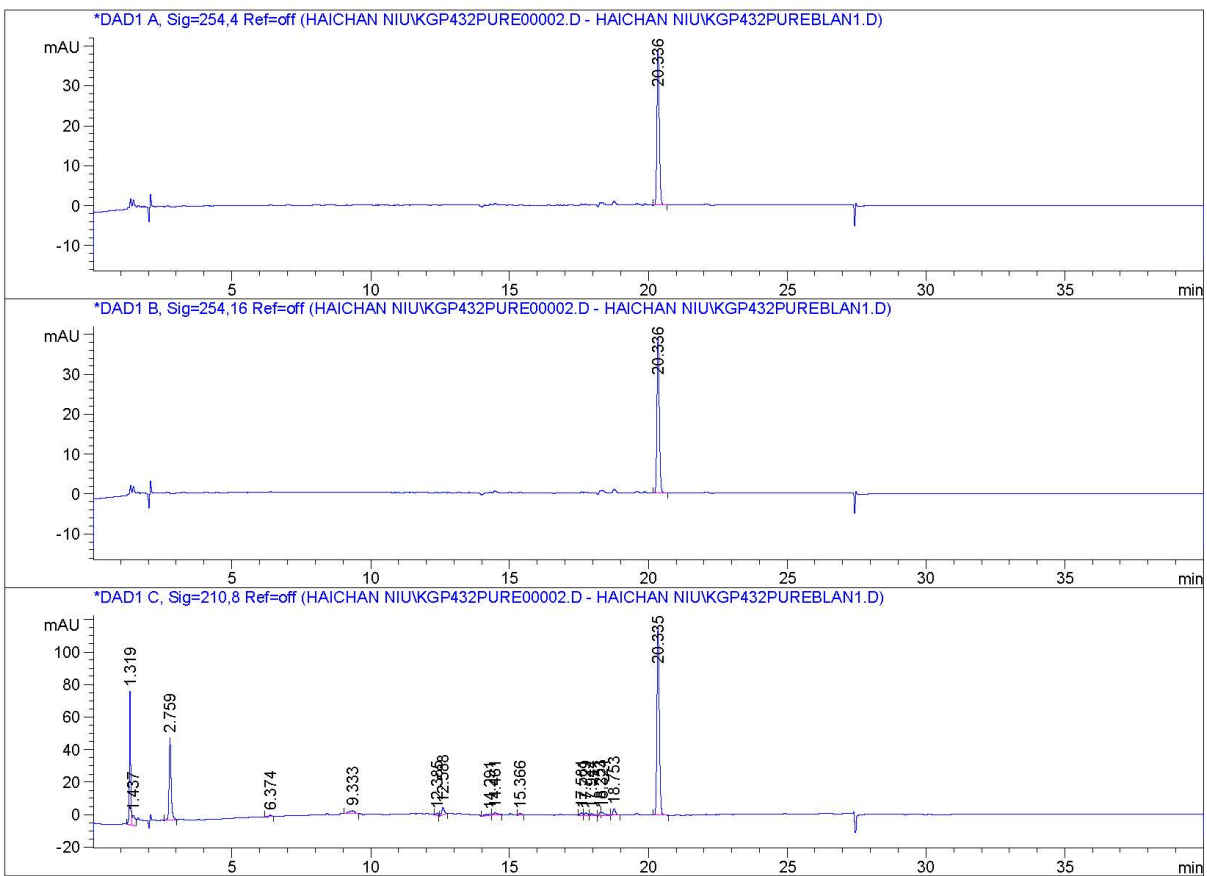

Data File C:\CHEM32\1\DATA\HAICHAN NIU\KGP432PURE00002.D  
Sample Name: KGP432PURE

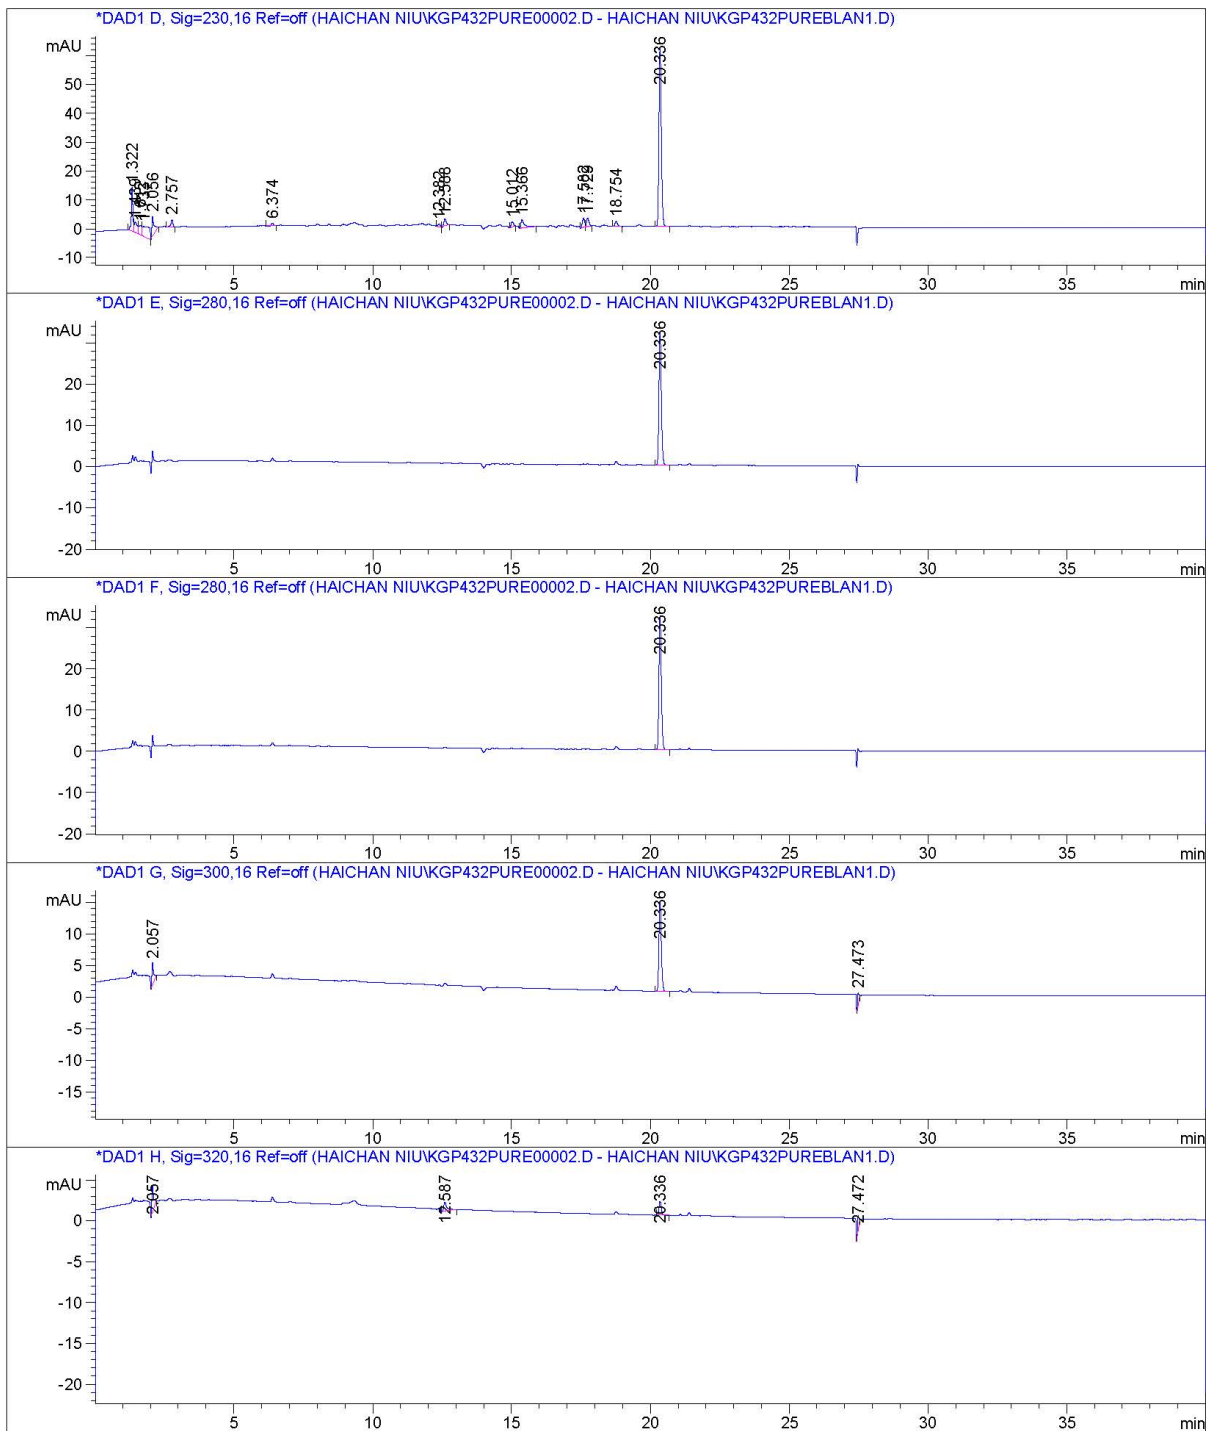

=====  
Area Percent Report  
=====

Sorted By : Signal  
Multiplier : 1.0000  
Dilution : 1.0000  
Use Multiplier & Dilution Factor with ISTDs

Signal 1: DAD1 A, Sig=254,4 Ref=off  
Signal has been modified after loading from rawdata file!

| Peak # | RetTime [min] | Type | Width [min] | Area [mAU*s] | Height [mAU] | Area %   |
|--------|---------------|------|-------------|--------------|--------------|----------|
| 1      | 20.336        | BB   | 0.0911      | 232.63359    | 39.28381     | 100.0000 |

Totals : 232.63359 39.28381

Signal 2: DAD1 B, Sig=254,16 Ref=off  
Signal has been modified after loading from rawdata file!

| Peak # | RetTime [min] | Type | Width [min] | Area [mAU*s] | Height [mAU] | Area %   |
|--------|---------------|------|-------------|--------------|--------------|----------|
| 1      | 20.336        | BB   | 0.0911      | 231.28467    | 39.05958     | 100.0000 |

Totals : 231.28467 39.05958

Signal 3: DAD1 C, Sig=210,8 Ref=off  
Signal has been modified after loading from rawdata file!

| Peak # | RetTime [min] | Type | Width [min] | Area [mAU*s] | Height [mAU] | Area %  |
|--------|---------------|------|-------------|--------------|--------------|---------|
| 1      | 1.319         | BV   | 0.0489      | 260.75351    | 82.55019     | 17.7987 |
| 2      | 1.437         | VV   | 0.1036      | 47.33643     | 6.16161      | 3.2311  |
| 3      | 2.759         | BB   | 0.0768      | 255.48390    | 50.70833     | 17.4390 |
| 4      | 6.374         | BB   | 0.0823      | 5.57547      | 1.01177      | 0.3806  |
| 5      | 9.333         | BB   | 0.1893      | 24.71848     | 1.81080      | 1.6872  |
| 6      | 12.385        | BB   | 0.0865      | 8.75978      | 1.58423      | 0.5979  |
| 7      | 12.588        | BB   | 0.0978      | 31.46048     | 4.83926      | 2.1474  |
| 8      | 14.291        | BV   | 0.2076      | 17.33635     | 1.07805      | 1.1834  |
| 9      | 14.461        | VB   | 0.1360      | 15.93825     | 1.63093      | 1.0879  |
| 10     | 15.366        | BB   | 0.0970      | 6.95629      | 1.11114      | 0.4748  |
| 11     | 17.581        | BV   | 0.0945      | 10.15225     | 1.72910      | 0.6930  |
| 12     | 17.729        | VV   | 0.1199      | 14.59630     | 1.77480      | 0.9963  |
| 13     | 17.944        | VB   | 0.1494      | 15.66255     | 1.41234      | 1.0691  |

Data File C:\CHEM32\1\DATA\HAICHAN NIU\KGP432PURE00002.D  
Sample Name: KGP432PURE

| Peak #   | RetTime [min] | Type | Width [min] | Area [mAU*s] | Height [mAU] | Area %  |
|----------|---------------|------|-------------|--------------|--------------|---------|
| 14       | 18.253        | BV   | 0.0658      | 9.19920      | 2.15420      | 0.6279  |
| 15       | 18.324        | VV   | 0.1435      | 22.91031     | 2.13003      | 1.5638  |
| 16       | 18.753        | VB   | 0.1015      | 27.17989     | 3.98938      | 1.8553  |
| 17       | 20.335        | BB   | 0.0912      | 690.99847    | 116.52905    | 47.1666 |
| Totals : |               |      |             | 1465.01791   | 282.20521    |         |

Signal 4: DAD1 D, Sig=230,16 Ref=off  
Signal has been modified after loading from rawdata file!

| Peak #   | RetTime [min] | Type | Width [min] | Area [mAU*s] | Height [mAU] | Area %  |
|----------|---------------|------|-------------|--------------|--------------|---------|
| 1        | 1.322         | BV   | 0.0560      | 57.86644     | 15.32926     | 8.0494  |
| 2        | 1.439         | VV   | 0.1102      | 29.74799     | 3.60819      | 4.1380  |
| 3        | 1.612         | VV   | 0.0992      | 23.27344     | 3.18779      | 3.2374  |
| 4        | 1.733         | VB   | 0.2284      | 63.24105     | 3.44190      | 8.7970  |
| 5        | 2.056         | BB   | 0.0847      | 43.10315     | 7.11233      | 5.9958  |
| 6        | 2.757         | BB   | 0.0821      | 13.99879     | 2.54623      | 1.9473  |
| 7        | 6.374         | BB   | 0.0871      | 5.96154      | 1.03719      | 0.8293  |
| 8        | 12.382        | VB   | 0.0990      | 6.91451      | 1.10573      | 0.9618  |
| 9        | 12.588        | BB   | 0.0956      | 15.90767     | 2.52272      | 2.2128  |
| 10       | 15.012        | BB   | 0.0996      | 12.44775     | 1.92126      | 1.7315  |
| 11       | 15.366        | BB   | 0.1353      | 28.05904     | 2.94050      | 3.9031  |
| 12       | 17.582        | BV   | 0.0904      | 18.50554     | 3.35373      | 2.5742  |
| 13       | 17.729        | VB   | 0.0968      | 18.37617     | 2.94478      | 2.5562  |
| 14       | 18.754        | BB   | 0.0956      | 11.36227     | 1.80087      | 1.5805  |
| 15       | 20.336        | BB   | 0.0912      | 370.12521    | 62.44468     | 51.4856 |
| Totals : |               |      |             | 718.89054    | 115.29715    |         |

Signal 5: DAD1 E, Sig=280,16 Ref=off  
Signal has been modified after loading from rawdata file!

| Peak #   | RetTime [min] | Type | Width [min] | Area [mAU*s] | Height [mAU] | Area %   |
|----------|---------------|------|-------------|--------------|--------------|----------|
| 1        | 20.336        | BB   | 0.0912      | 192.61380    | 32.48762     | 100.0000 |
| Totals : |               |      |             | 192.61380    | 32.48762     |          |



Data File C:\CHEM32\1\DATA\HAICHAN NIU\KGP432PURE00002.D  
Sample Name: KGP432PURE

Signal 6: DAD1 F, Sig=280,16 Ref=off  
Signal has been modified after loading from rawdata file!

| Peak #   | RetTime [min] | Type | Width [min] | Area [mAU*s] | Height [mAU] | Area %   |
|----------|---------------|------|-------------|--------------|--------------|----------|
| 1        | 20.336        | BB   | 0.0912      | 192.61380    | 32.48762     | 100.0000 |
| Totals : |               |      |             | 192.61380    | 32.48762     |          |

Signal 7: DAD1 G, Sig=300,16 Ref=off  
Signal has been modified after loading from rawdata file!

| Peak #   | RetTime [min] | Type | Width [min] | Area [mAU*s] | Height [mAU] | Area %  |
|----------|---------------|------|-------------|--------------|--------------|---------|
| 1        | 2.057         | BB   | 0.0691      | 17.22527     | 3.64822      | 15.5859 |
| 2        | 20.336        | BB   | 0.0912      | 85.20393     | 14.35921     | 77.0948 |
| 3        | 27.473        | BB   | 0.0559      | 8.08915      | 2.15147      | 7.3193  |
| Totals : |               |      |             | 110.51835    | 20.15891     |         |

Signal 8: DAD1 H, Sig=320,16 Ref=off  
Signal has been modified after loading from rawdata file!

| Peak #   | RetTime [min] | Type | Width [min] | Area [mAU*s] | Height [mAU] | Area %  |
|----------|---------------|------|-------------|--------------|--------------|---------|
| 1        | 2.057         | BB   | 0.0679      | 15.75689     | 3.41272      | 35.8994 |
| 2        | 12.587        | BB   | 0.1215      | 9.52415      | 1.11658      | 21.6992 |
| 3        | 20.336        | BB   | 0.0922      | 10.25658     | 1.70470      | 23.3679 |
| 4        | 27.472        | BB   | 0.0601      | 8.35416      | 2.11248      | 19.0335 |
| Totals : |               |      |             | 43.89178     | 8.34649      |         |

=====  
\*\*\* End of Report \*\*\*

15. 2-methoxy-5-(3,4,5-trimethoxyphenyl)-6,7,8,9-tetrahydro-5H-benzo[7]annulene-1,5,6-triol

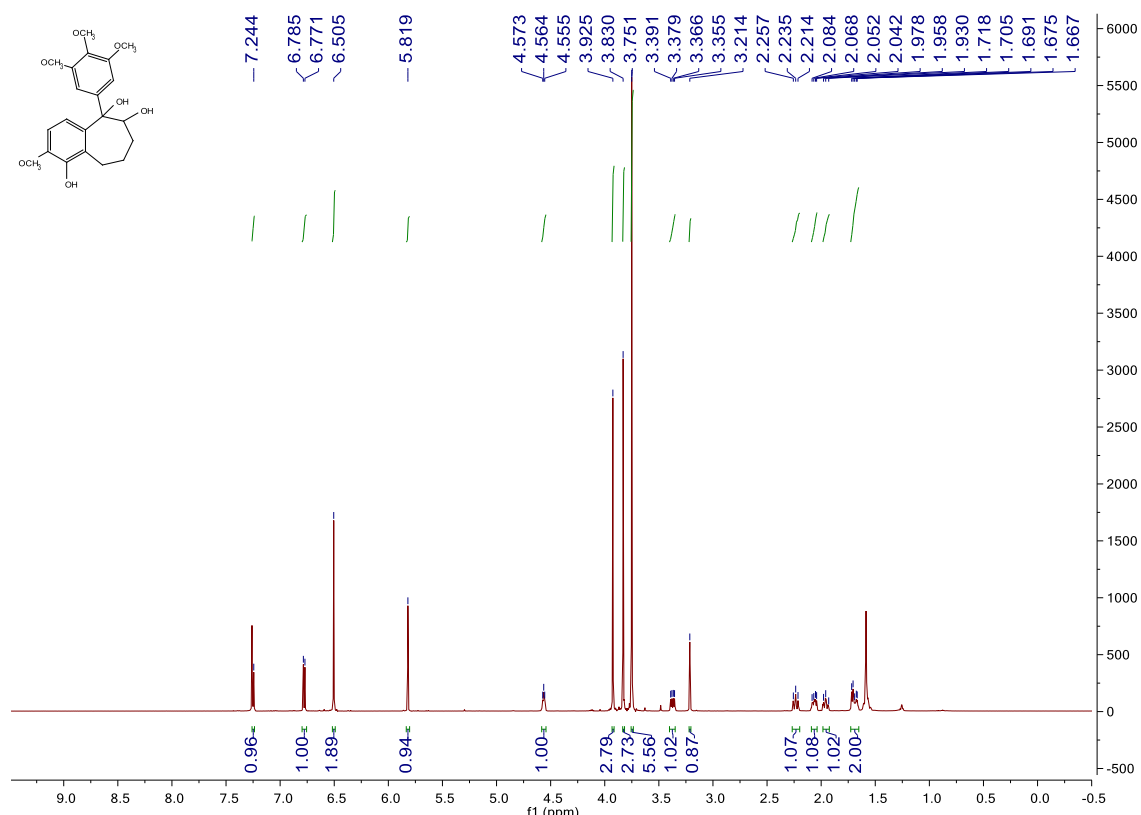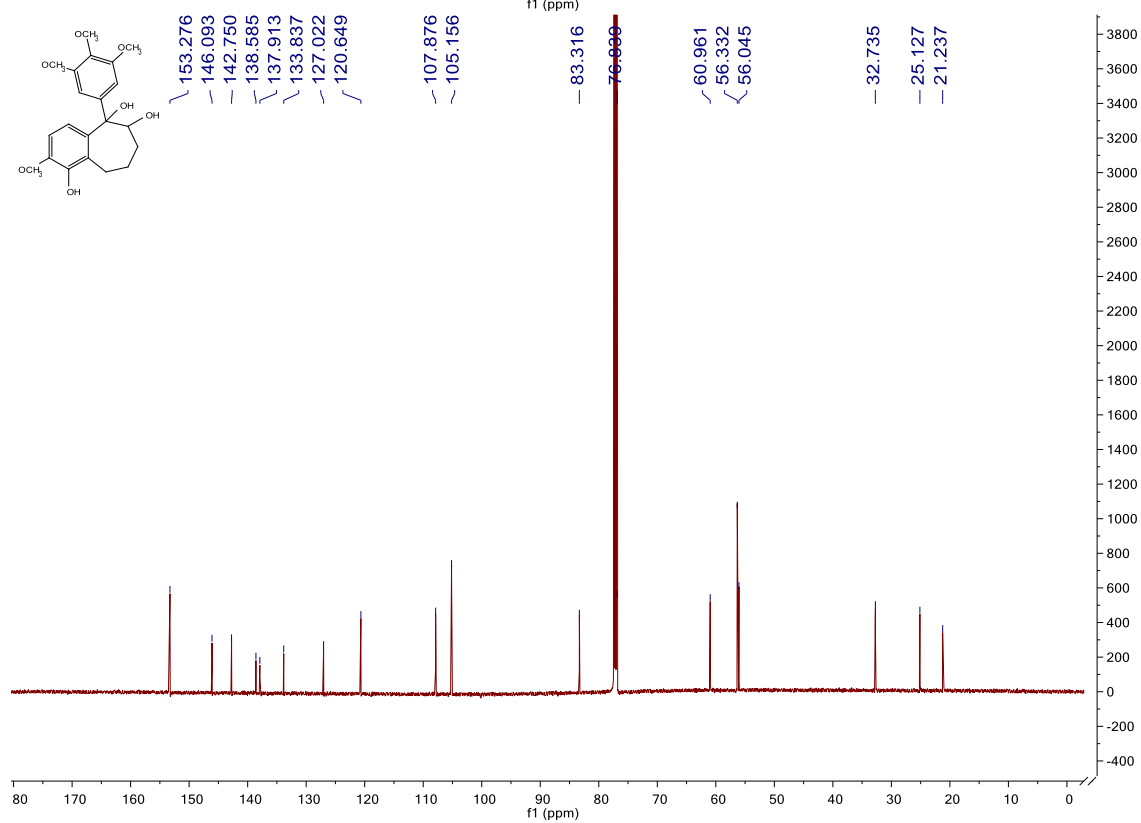

NHC\_5\_23\_+esi #2-16 RT: 0.02-0.16 AV: 15 NL: 7.38E5  
T: FTMS + p ESI Full ms [200.00-1000.00]

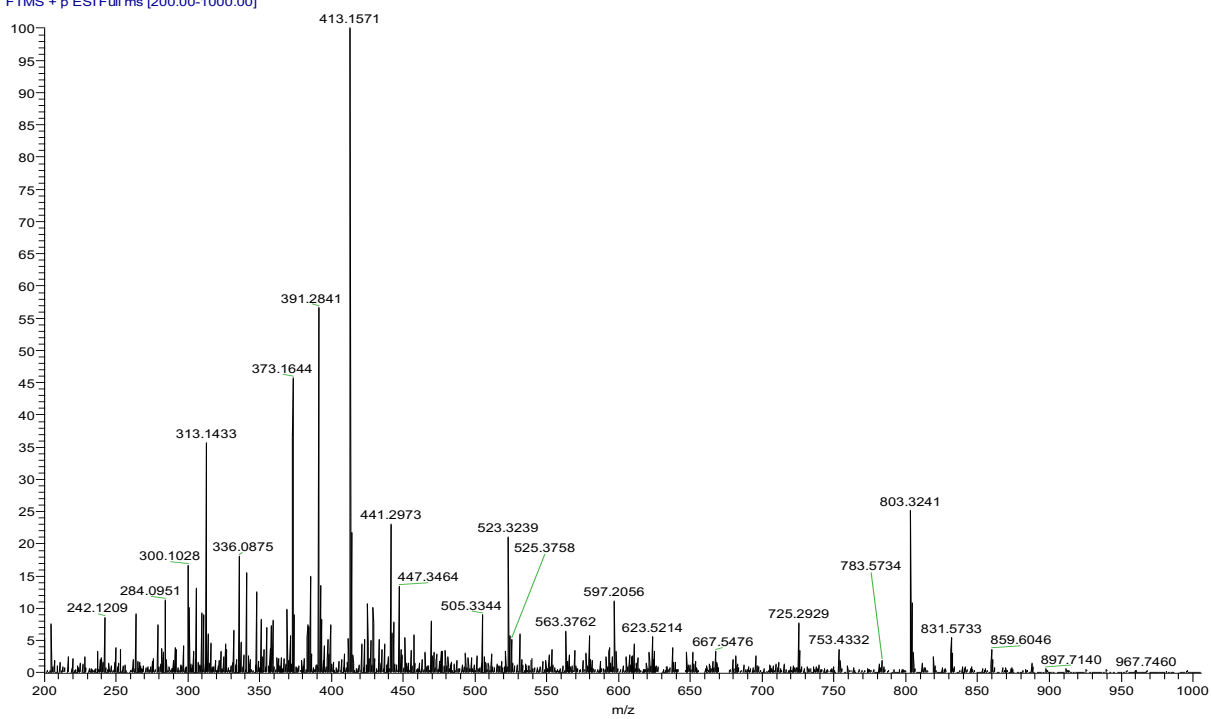



Data File C:\Chem32\1\Data\NHC\KGP512\_Repurified.D  
Sample Name: KGP512\_Repurified

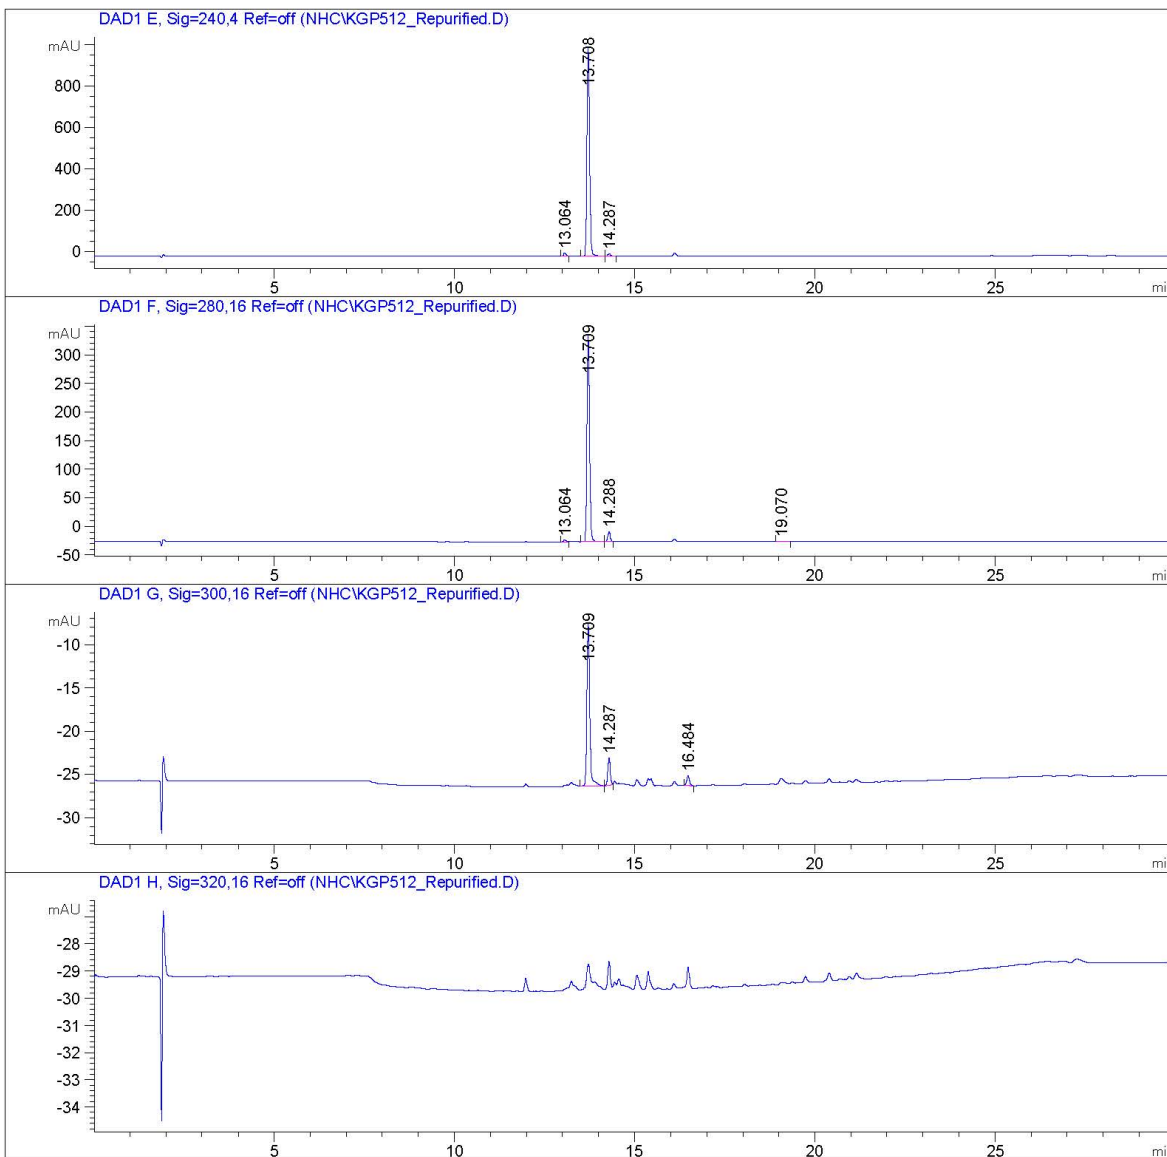

=====  
Area Percent Report  
=====

Sorted By : Signal  
Multiplier : 1.0000  
Dilution : 1.0000  
Use Multiplier & Dilution Factor with ISTDs

Data File C:\Chem32\1\Data\NHC\KGP512\_Repurified.D  
Sample Name: KGP512\_Repurified

Signal 1: DAD1 A, Sig=254,4 Ref=off

| Peak # | RetTime [min] | Type | Width [min] | Area [mAU*s] | Height [mAU] | Area %  |
|--------|---------------|------|-------------|--------------|--------------|---------|
| 1      | 13.065        | BB   | 0.0701      | 9.77358      | 2.18956      | 1.0897  |
| 2      | 13.709        | BB   | 0.0768      | 803.74414    | 159.43422    | 89.6147 |
| 3      | 14.287        | BV   | 0.0774      | 53.67685     | 10.53643     | 5.9848  |
| 4      | 16.106        | BV   | 0.0852      | 29.69427     | 5.31389      | 3.3108  |

Totals : 896.88884 177.47410

Signal 2: DAD1 B, Sig=254,16 Ref=off

| Peak # | RetTime [min] | Type | Width [min] | Area [mAU*s] | Height [mAU] | Area %  |
|--------|---------------|------|-------------|--------------|--------------|---------|
| 1      | 13.065        | BB   | 0.0707      | 14.80410     | 3.27786      | 1.1408  |
| 2      | 13.709        | BB   | 0.0764      | 1192.41064   | 238.00854    | 91.8902 |
| 3      | 14.287        | BV   | 0.0773      | 56.18486     | 11.06061     | 4.3297  |
| 4      | 16.106        | BV   | 0.0854      | 34.24756     | 6.11318      | 2.6392  |

Totals : 1297.64717 258.46019

Signal 3: DAD1 C, Sig=210,8 Ref=off

| Peak # | RetTime [min] | Type | Width [min] | Area [mAU*s] | Height [mAU] | Area %  |
|--------|---------------|------|-------------|--------------|--------------|---------|
| 1      | 13.064        | BV   | 0.0737      | 503.09753    | 105.46986    | 2.6442  |
| 2      | 13.709        | BV   | 0.1216      | 1.76493e4    | 2351.60596   | 92.7631 |
| 3      | 14.287        | VV   | 0.0888      | 395.12784    | 65.10931     | 2.0768  |
| 4      | 16.106        | BV   | 0.0856      | 478.67270    | 85.10723     | 2.5159  |

Totals : 1.90262e4 2607.29237

Signal 4: DAD1 D, Sig=230,16 Ref=off

| Peak # | RetTime [min] | Type | Width [min] | Area [mAU*s] | Height [mAU] | Area %  |
|--------|---------------|------|-------------|--------------|--------------|---------|
| 1      | 13.064        | BV   | 0.0745      | 136.84071    | 28.25139     | 1.5156  |
| 2      | 13.709        | BV   | 0.0806      | 8801.68359   | 1694.72278   | 97.4875 |
| 3      | 14.287        | VV   | 0.0841      | 89.99856     | 15.89352     | 0.9968  |

Totals : 9028.52287 1738.86769

Data File C:\Chem32\1\Data\NHC\KGP512\_Repurified.D  
Sample Name: KGP512\_Repurified

Signal 5: DAD1 E, Sig=240,4 Ref=off

| Peak # | RetTime [min] | Type | Width [min] | Area [mAU*s] | Height [mAU] | Area %  |
|--------|---------------|------|-------------|--------------|--------------|---------|
| 1      | 13.064        | BV   | 0.0753      | 74.07280     | 15.07936     | 1.4233  |
| 2      | 13.708        | BV   | 0.0764      | 5061.45850   | 1011.85809   | 97.2548 |
| 3      | 14.287        | VV   | 0.0864      | 68.79644     | 11.72970     | 1.3219  |

Totals : 5204.32774 1038.66716

Signal 6: DAD1 F, Sig=280,16 Ref=off

| Peak # | RetTime [min] | Type | Width [min] | Area [mAU*s] | Height [mAU] | Area %  |
|--------|---------------|------|-------------|--------------|--------------|---------|
| 1      | 13.064        | BV   | 0.0791      | 17.30797     | 3.30291      | 0.9096  |
| 2      | 13.709        | BB   | 0.0757      | 1789.19055   | 362.00397    | 94.0249 |
| 3      | 14.288        | BV   | 0.0758      | 86.48084     | 17.46020     | 4.5447  |
| 4      | 19.070        | BB   | 0.1397      | 9.91008      | 1.05404      | 0.5208  |

Totals : 1902.88944 383.82111

Signal 7: DAD1 G, Sig=300,16 Ref=off

| Peak # | RetTime [min] | Type | Width [min] | Area [mAU*s] | Height [mAU] | Area %  |
|--------|---------------|------|-------------|--------------|--------------|---------|
| 1      | 13.709        | BB   | 0.0833      | 102.49873    | 18.90524     | 82.9384 |
| 2      | 14.287        | BV   | 0.0750      | 15.30013     | 3.13398      | 12.3803 |
| 3      | 16.484        | BB   | 0.0806      | 5.78537      | 1.11370      | 4.6813  |

Totals : 123.58423 23.15292

Signal 8: DAD1 H, Sig=320,16 Ref=off

=====  
\*\*\* End of Report \*\*\*

18. 3-methoxy-9-(3,4,5-trimethoxyphenyl)-6,7-dihydro-5H-benzo[7]annulene-4-carbonitrile

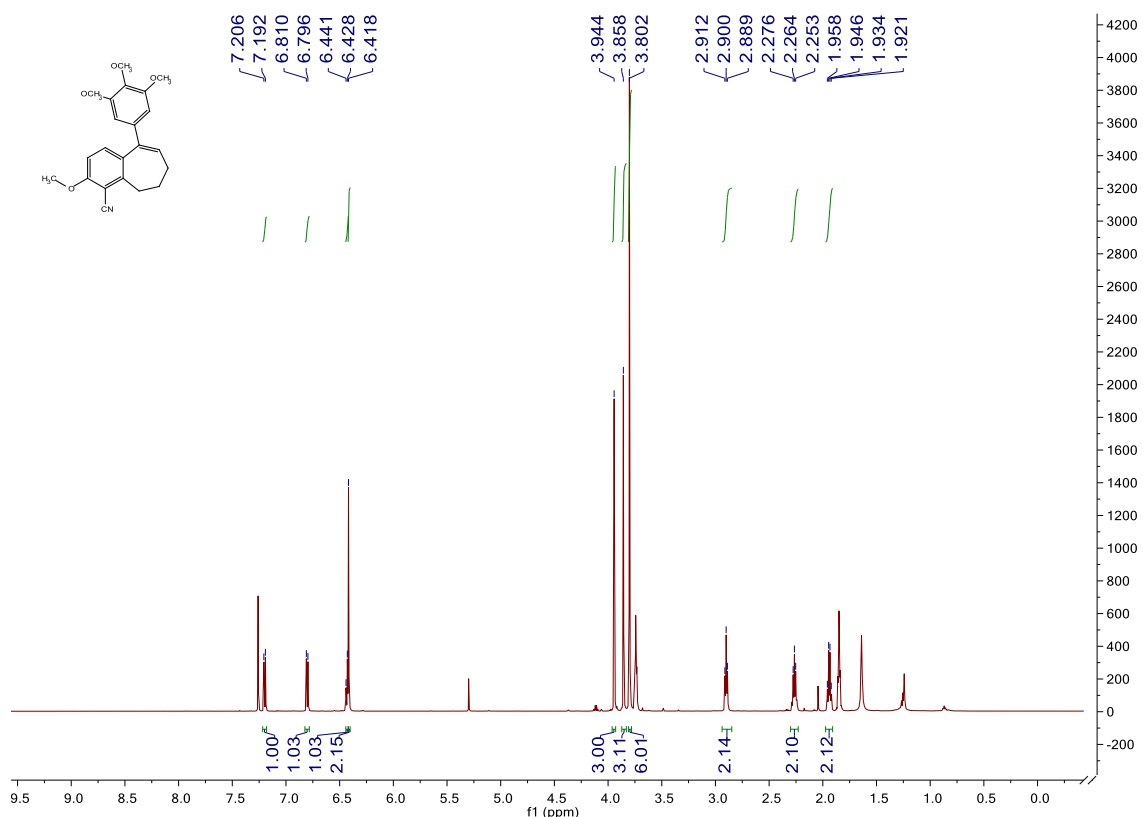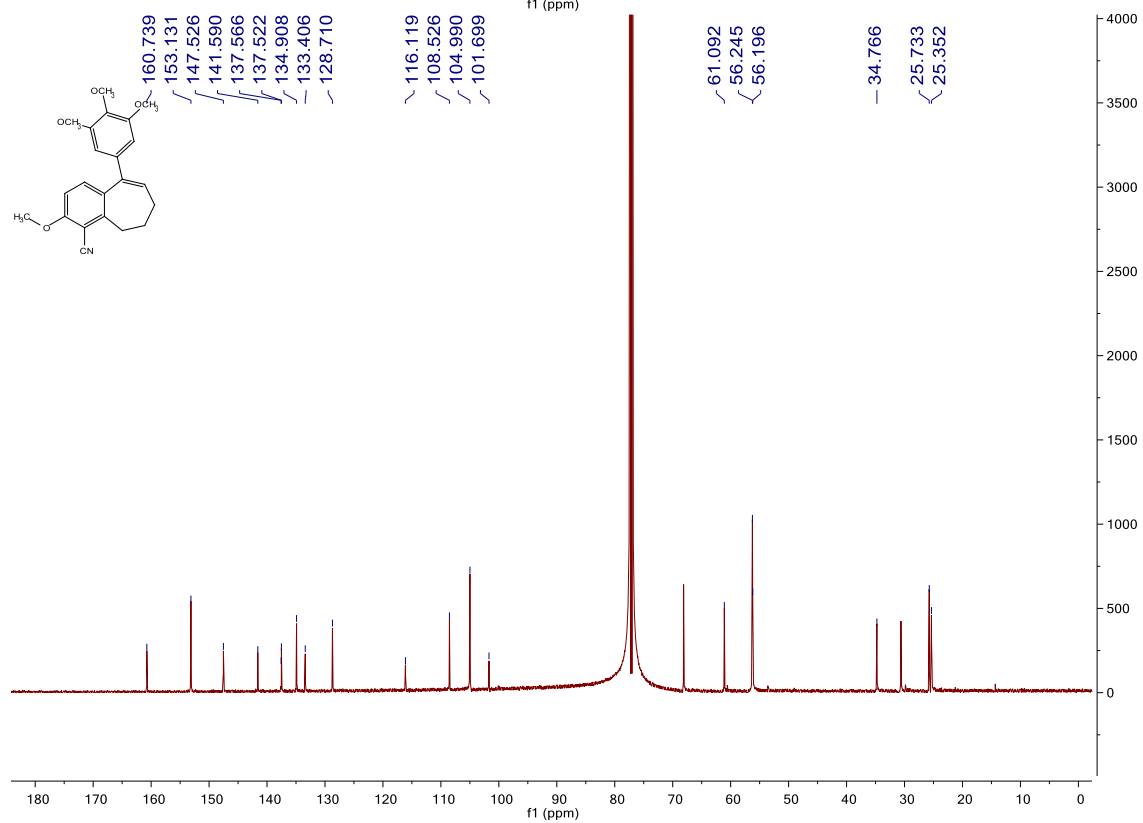



NHC\_4\_55\_F2\_+ESI#2-14 RT: 0.02-0.15 AV: 13 NL: 1.04E6  
T: FTMS + p ESI Full ms [200.00-1000.00]

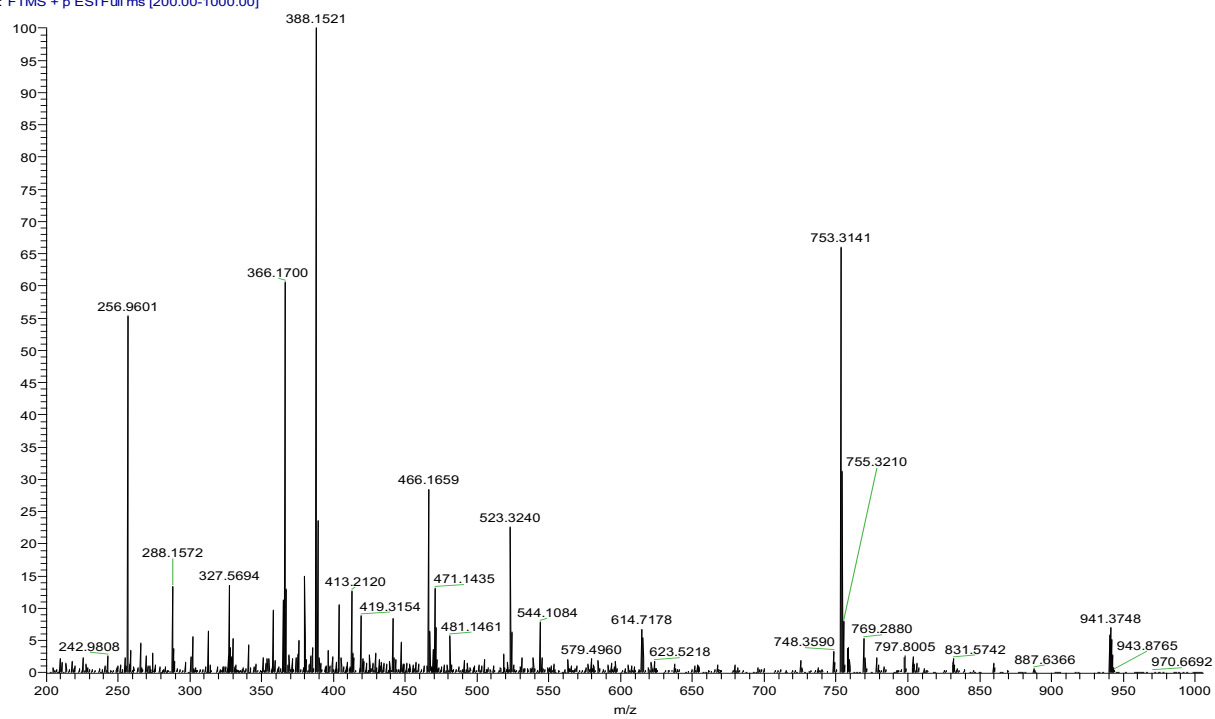

Data File C:\Chem32\1\Data\NHC\NHC\_4\_60\_KGP503\_Rerun.D  
Sample Name: KGP503\_NHC\_4\_60\_Rerun

=====

Acq. Operator : SYSTEM  
Sample Operator : SYSTEM  
Acq. Instrument : 1200 HPLC Location : 1  
Injection Date : 4/13/2017 6:13:07 PM  
Inj Volume : No inj

Acq. Method : C:\Chem32\1\Methods\MASTERMETHOD2.M  
Last changed : 12/2/2015 12:37:42 PM by Eric Lin  
Analysis Method : C:\CHEM32\1\METHODS\RT-ACNWASH 2.M  
Last changed : 7/9/2015 2:27:22 PM by Blake  
Method Info : General Column Wash Method

Sample Info : sample

Additional Info : Peak(s) manually integrated

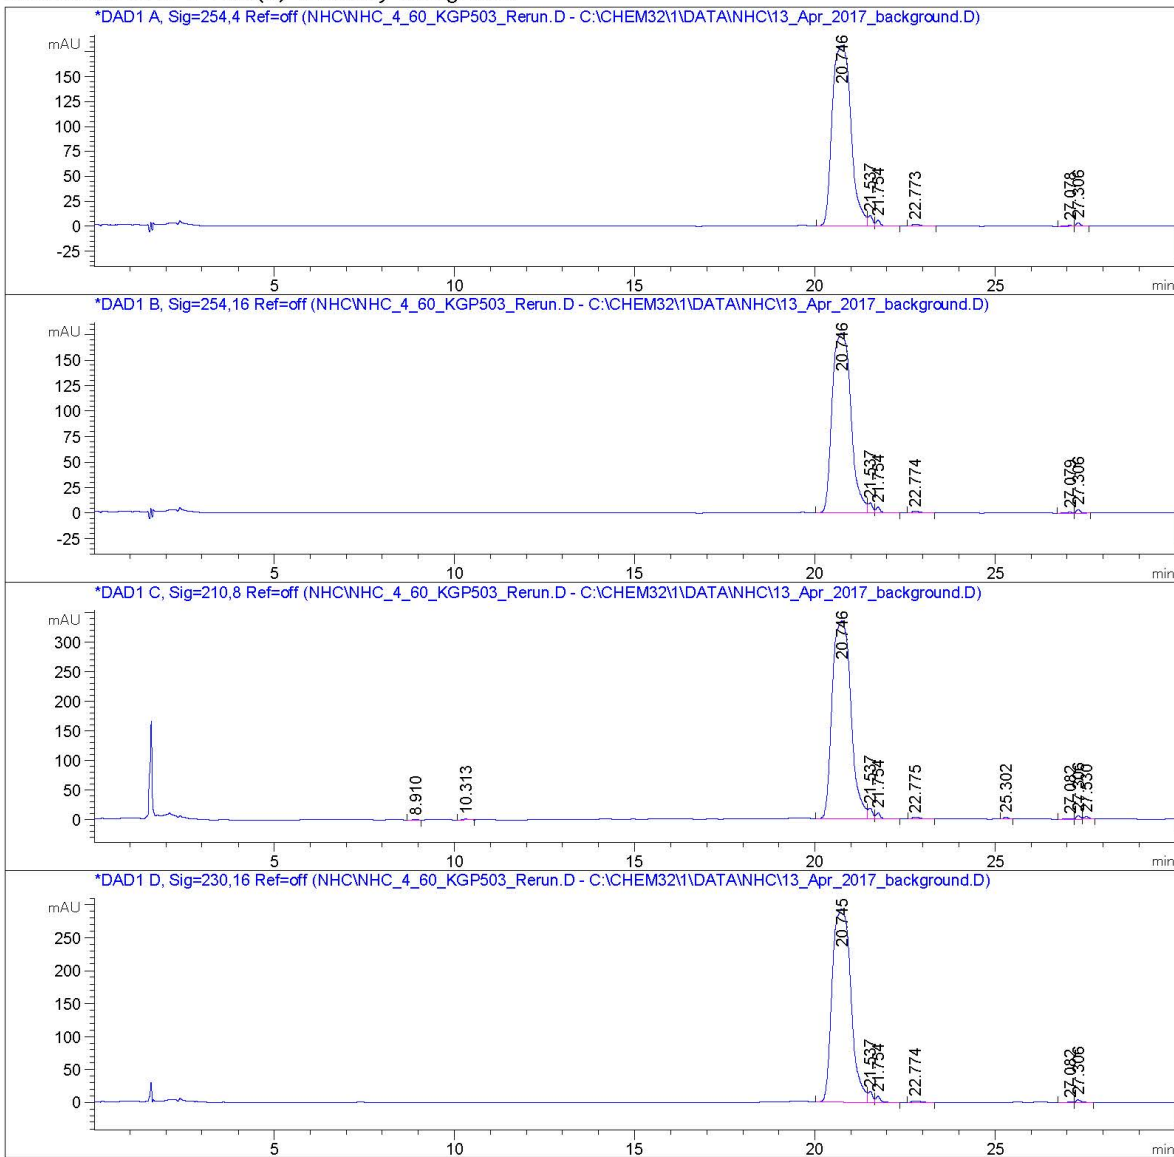

Data File C:\Chem32\1\Data\NHC\NHC\_4\_60\_KGP503\_Rerun.D  
Sample Name: KGP503\_NHC\_4\_60\_Rerun

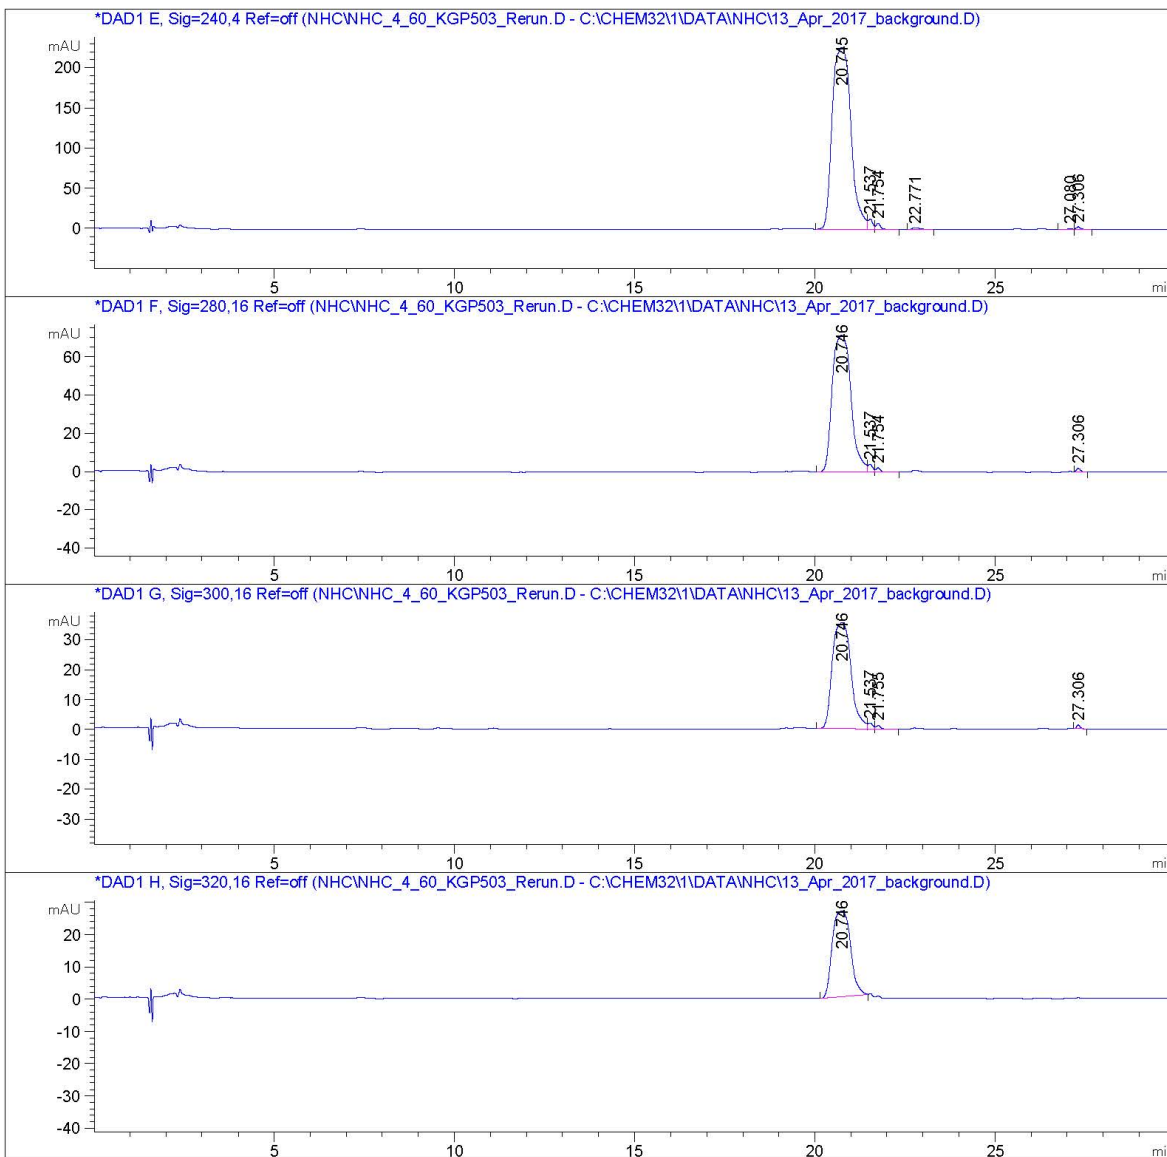

=====  
Area Percent Report  
=====

Sorted By : Signal  
Multiplier : 1.0000  
Dilution : 1.0000  
Use Multiplier & Dilution Factor with ISTDs

Data File C:\Chem32\1\Data\NHC\NHC\_4\_60\_KGP503\_Rerun.D  
Sample Name: KGP503\_NHC\_4\_60\_Rerun

Signal 1: DAD1 A, Sig=254,4 Ref=off  
Signal has been modified after loading from rawdata file!

| Peak # | RetTime [min] | Type | Width [min] | Area [mAU*s] | Height [mAU] | Area %  |
|--------|---------------|------|-------------|--------------|--------------|---------|
| 1      | 20.746        | BV   | 0.5806      | 6496.62305   | 181.07161    | 96.8448 |
| 2      | 21.537        | VV   | 0.1249      | 87.63673     | 10.13339     | 1.3064  |
| 3      | 21.754        | VB   | 0.1259      | 48.88611     | 5.70871      | 0.7287  |
| 4      | 22.773        | BB   | 0.2493      | 28.75137     | 1.68332      | 0.4286  |
| 5      | 27.078        | BV   | 0.1778      | 15.20079     | 1.19977      | 0.2266  |
| 6      | 27.306        | VB   | 0.1239      | 31.18135     | 3.71487      | 0.4648  |

Totals : 6708.27940 203.51166

Signal 2: DAD1 B, Sig=254,16 Ref=off  
Signal has been modified after loading from rawdata file!

| Peak # | RetTime [min] | Type | Width [min] | Area [mAU*s] | Height [mAU] | Area %  |
|--------|---------------|------|-------------|--------------|--------------|---------|
| 1      | 20.746        | BV   | 0.5806      | 6318.01221   | 176.10487    | 96.8661 |
| 2      | 21.537        | VV   | 0.1249      | 85.17250     | 9.85030      | 1.3058  |
| 3      | 21.754        | VB   | 0.1260      | 47.56451     | 5.54766      | 0.7292  |
| 4      | 22.774        | BB   | 0.2526      | 26.80340     | 1.57420      | 0.4109  |
| 5      | 27.079        | BV   | 0.1803      | 14.68895     | 1.15591      | 0.2252  |
| 6      | 27.306        | VB   | 0.1249      | 30.17599     | 3.56095      | 0.4627  |

Totals : 6522.41755 197.79389

Signal 3: DAD1 C, Sig=210,8 Ref=off  
Signal has been modified after loading from rawdata file!

| Peak # | RetTime [min] | Type | Width [min] | Area [mAU*s] | Height [mAU] | Area %  |
|--------|---------------|------|-------------|--------------|--------------|---------|
| 1      | 8.910         | BB   | 0.2193      | 19.95940     | 1.13417      | 0.1596  |
| 2      | 10.313        | BB   | 0.0907      | 11.23343     | 1.80299      | 0.0899  |
| 3      | 20.746        | BV   | 0.5806      | 1.20101e4    | 334.73129    | 96.0626 |
| 4      | 21.537        | VV   | 0.1248      | 161.23265    | 18.66839     | 1.2896  |
| 5      | 21.754        | VB   | 0.1269      | 91.25467     | 10.55160     | 0.7299  |
| 6      | 22.775        | BB   | 0.2788      | 55.21412     | 3.14467      | 0.4416  |
| 7      | 25.302        | BB   | 0.1264      | 28.33697     | 3.50110      | 0.2267  |
| 8      | 27.082        | BV   | 0.1789      | 24.07454     | 1.91226      | 0.1926  |
| 9      | 27.306        | VV   | 0.1174      | 52.81111     | 6.74406      | 0.4224  |
| 10     | 27.530        | VB   | 0.1599      | 48.15096     | 4.53419      | 0.3851  |

Totals : 1.25023e4 386.72474

Data File C:\Chem32\1\Data\NHC\NHC\_4\_60\_KGP503\_Rerun.D  
Sample Name: KGP503\_NHC\_4\_60\_Rerun

Signal 4: DAD1 D, Sig=230,16 Ref=off  
Signal has been modified after loading from rawdata file!

| Peak # | RetTime [min] | Type | Width [min] | Area [mAU*s] | Height [mAU] | Area %  |
|--------|---------------|------|-------------|--------------|--------------|---------|
| 1      | 20.745        | BV   | 0.5804      | 1.05244e4    | 293.48941    | 97.0376 |
| 2      | 21.537        | VV   | 0.1248      | 140.95088    | 16.32036     | 1.2996  |
| 3      | 21.754        | VB   | 0.1272      | 79.96591     | 9.21827      | 0.7373  |
| 4      | 22.774        | BB   | 0.2516      | 36.94115     | 2.15940      | 0.3406  |
| 5      | 27.082        | BV   | 0.1828      | 19.33566     | 1.49573      | 0.1783  |
| 6      | 27.306        | VB   | 0.1401      | 44.10019     | 4.50837      | 0.4066  |

Totals : 1.08457e4 327.19153

Signal 5: DAD1 E, Sig=240,4 Ref=off  
Signal has been modified after loading from rawdata file!

| Peak # | RetTime [min] | Type | Width [min] | Area [mAU*s] | Height [mAU] | Area %  |
|--------|---------------|------|-------------|--------------|--------------|---------|
| 1      | 20.745        | BV   | 0.5805      | 8119.95264   | 226.37668    | 97.1078 |
| 2      | 21.537        | VV   | 0.1249      | 108.94429    | 12.60018     | 1.3029  |
| 3      | 21.754        | VB   | 0.1275      | 61.87254     | 7.10915      | 0.7399  |
| 4      | 22.771        | BB   | 0.2471      | 25.56801     | 1.49789      | 0.3058  |
| 5      | 27.080        | BV   | 0.1745      | 14.83483     | 1.19784      | 0.1774  |
| 6      | 27.306        | VB   | 0.1345      | 30.61814     | 3.29323      | 0.3662  |

Totals : 8361.79044 252.07496

Signal 6: DAD1 F, Sig=280,16 Ref=off  
Signal has been modified after loading from rawdata file!

| Peak # | RetTime [min] | Type | Width [min] | Area [mAU*s] | Height [mAU] | Area %  |
|--------|---------------|------|-------------|--------------|--------------|---------|
| 1      | 20.746        | BV   | 0.5806      | 2565.01343   | 71.48746     | 97.3831 |
| 2      | 21.537        | VV   | 0.1244      | 34.30706     | 3.98565      | 1.3025  |
| 3      | 21.754        | VB   | 0.1269      | 19.40143     | 2.24244      | 0.7366  |
| 4      | 27.306        | BB   | 0.1114      | 15.21854     | 2.07902      | 0.5778  |

Totals : 2633.94046 79.79456

Signal 7: DAD1 G, Sig=300,16 Ref=off  
Signal has been modified after loading from rawdata file!

Data File C:\Chem32\1\Data\NHC\NHC\_4\_60\_KGP503\_Rerun.D  
Sample Name: KGP503\_NHC\_4\_60\_Rerun

| Peak #   | RetTime [min] | Type | Width [min] | Area [mAU*s] | Height [mAU] | Area %  |
|----------|---------------|------|-------------|--------------|--------------|---------|
| 1        | 20.746        | BV   | 0.5805      | 1271.03320   | 35.42966     | 97.2825 |
| 2        | 21.537        | VV   | 0.1247      | 17.07931     | 1.97868      | 1.3072  |
| 3        | 21.755        | VB   | 0.1249      | 9.63400      | 1.11392      | 0.7374  |
| 4        | 27.306        | BB   | 0.1101      | 8.79221      | 1.21982      | 0.6729  |
| Totals : |               |      |             | 1306.53873   | 39.74207     |         |

Signal 8: DAD1 H, Sig=320,16 Ref=off  
Signal has been modified after loading from rawdata file!

| Peak #   | RetTime [min] | Type | Width [min] | Area [mAU*s] | Height [mAU] | Area %   |
|----------|---------------|------|-------------|--------------|--------------|----------|
| 1        | 20.746        | BB   | 0.5668      | 923.98254    | 26.62748     | 100.0000 |
| Totals : |               |      |             | 923.98254    | 26.62748     |          |

=====  
\*\*\* End of Report \*\*\*

19. 2-methoxy-5-(3,4,5-trimethoxyphenyl)-7,8-dihydronaphthalene-1-carbonitrile

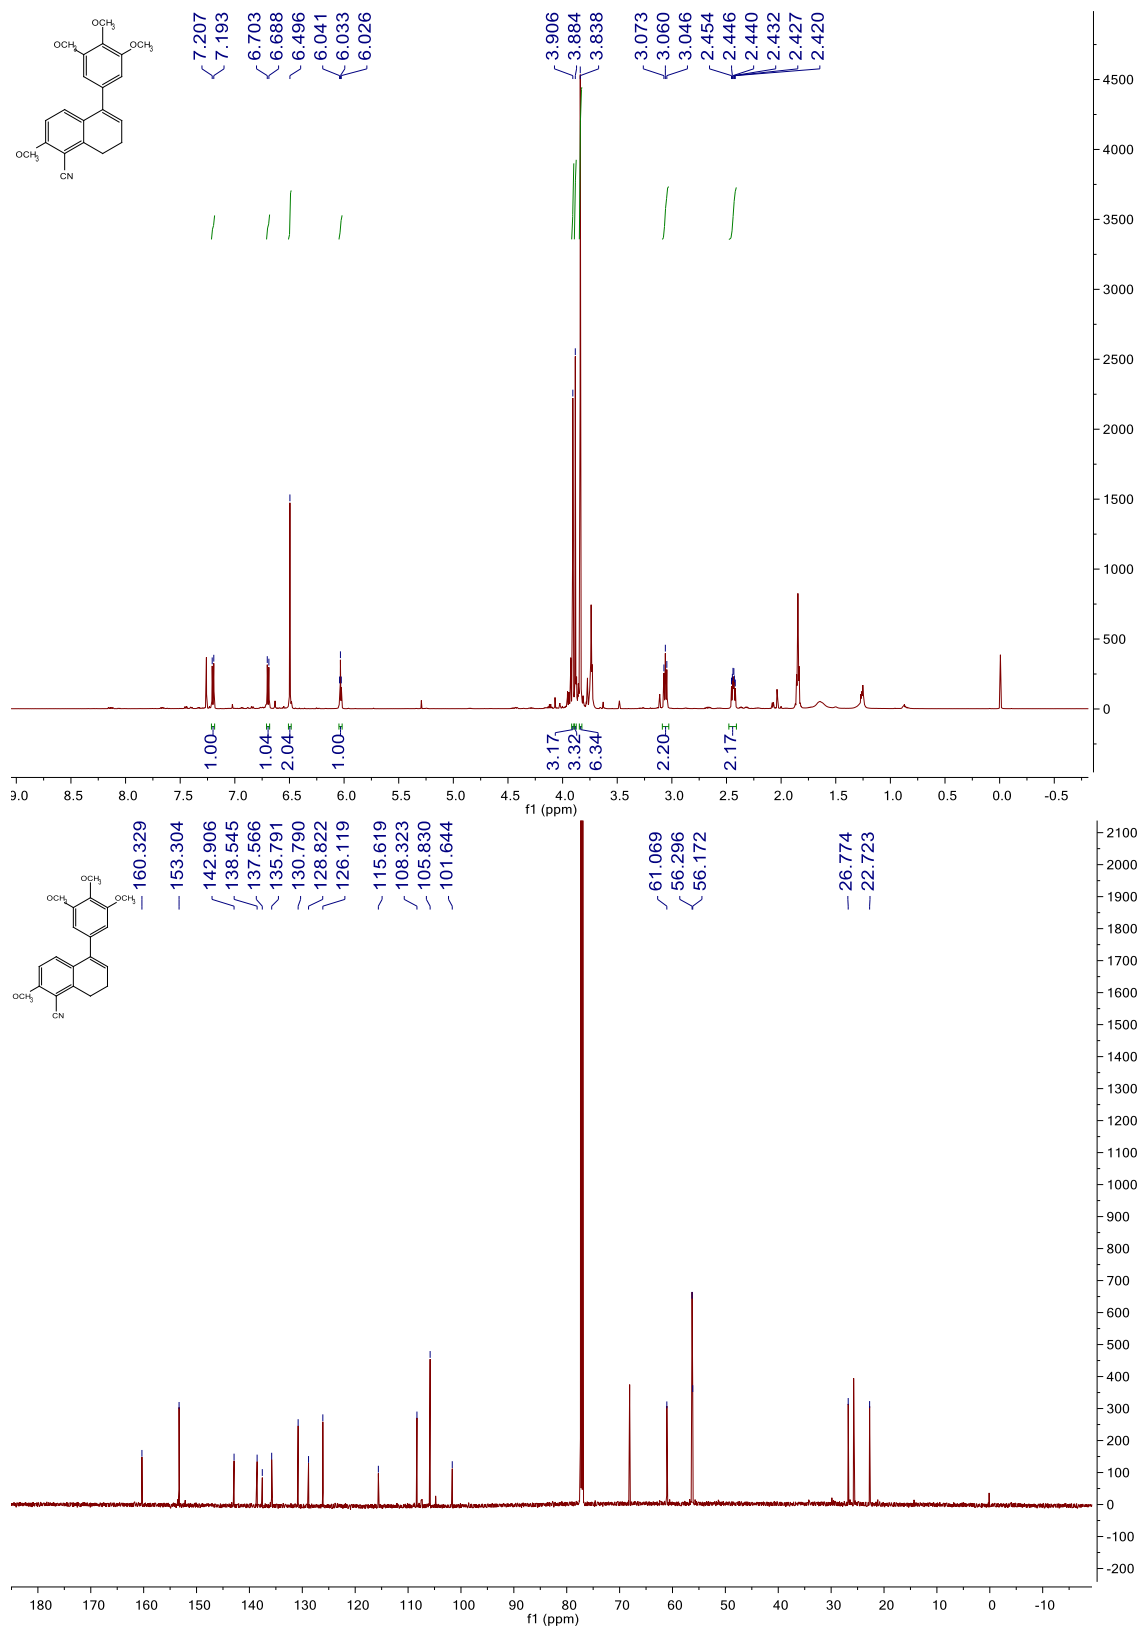

NHC\_3\_79\_nitrile group\_Orbi+ESI #1-43 RT: 0.01-0.37 AV: 43 NL: 1.95E6  
T: FTMS + p ESI Full ms [200.00-800.00]

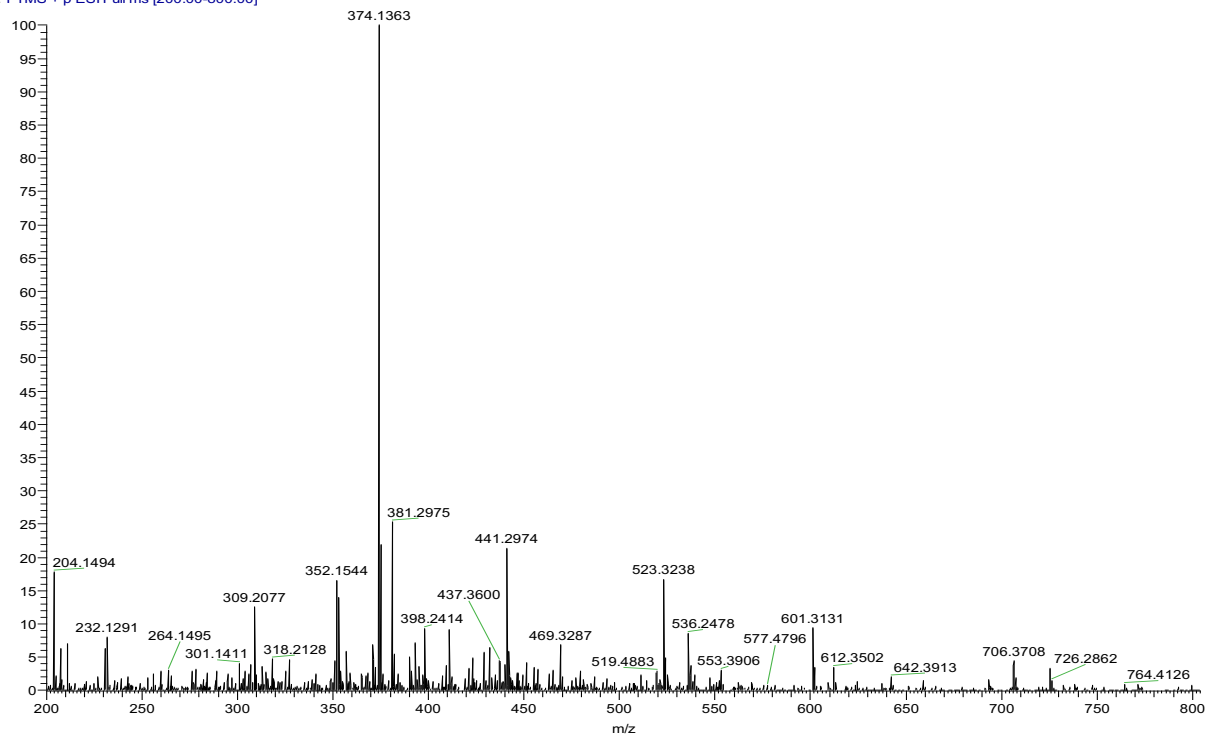





Data File C:\Chem32\1\Data\NHC\KGP483-Repurified-20160628.D  
Sample Name: KGP483-Repurified-20160628

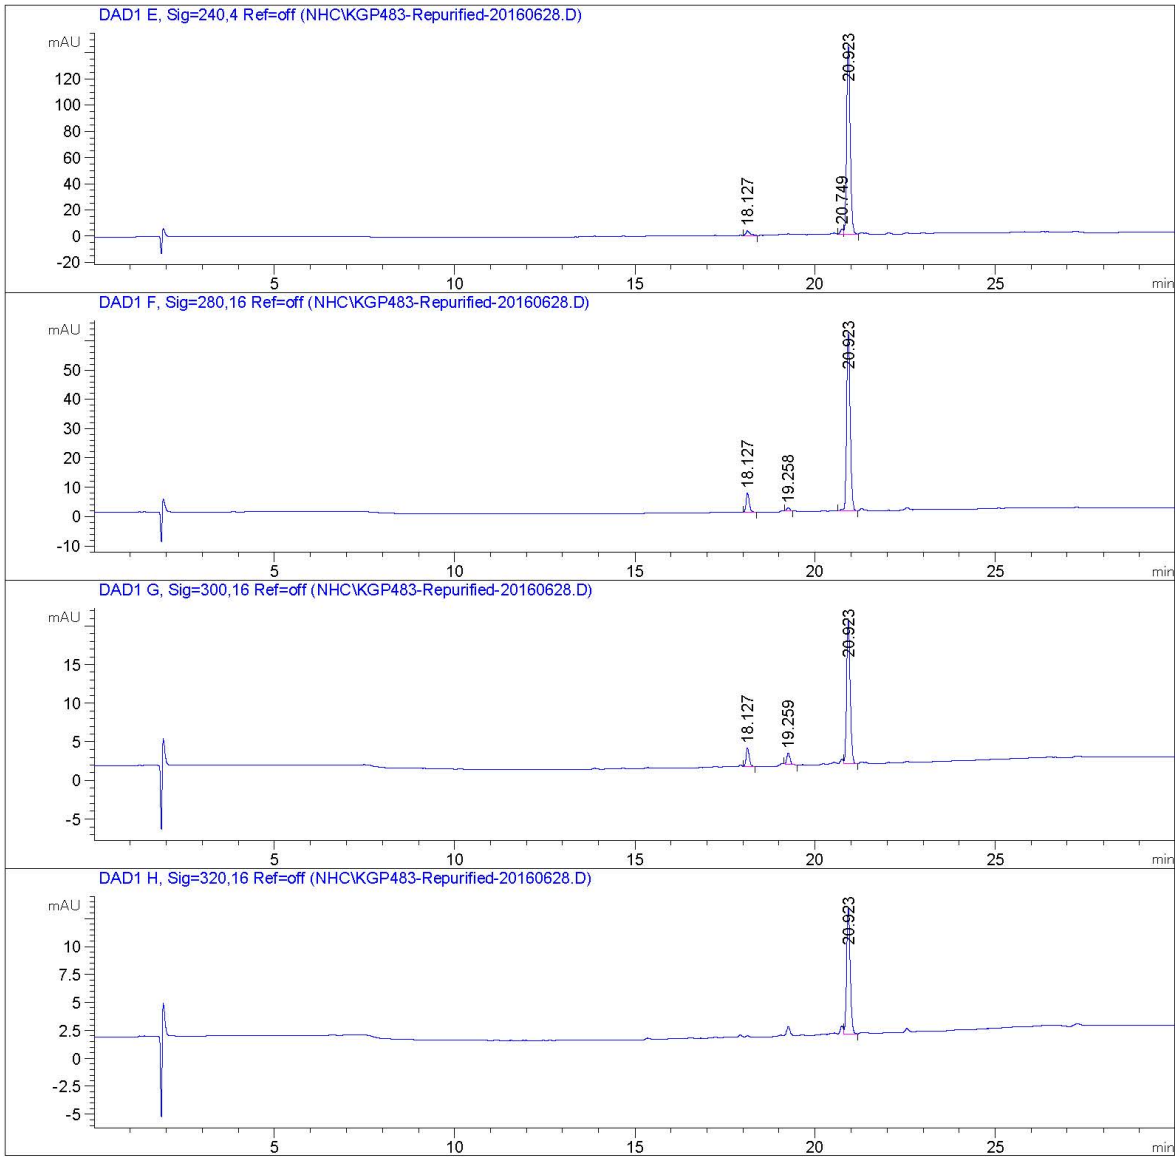

=====  
Area Percent Report  
=====

Sorted By : Signal  
Multiplier : 1.0000  
Dilution : 1.0000  
Use Multiplier & Dilution Factor with ISTDs

Data File C:\Chem32\1\Data\NHC\KGP483-Repurified-20160628.D  
Sample Name: KGP483-Repurified-20160628

Signal 1: DAD1 A, Sig=254,4 Ref=off

| Peak # | RetTime [min] | Type | Width [min] | Area [mAU*s] | Height [mAU] | Area %  |
|--------|---------------|------|-------------|--------------|--------------|---------|
| 1      | 18.127        | BB   | 0.0969      | 27.52547     | 4.40697      | 4.3551  |
| 2      | 20.756        | BV   | 0.0855      | 10.64724     | 1.95639      | 1.6846  |
| 3      | 20.923        | VB   | 0.1028      | 586.03583    | 89.03397     | 92.7231 |
| 4      | 22.549        | BB   | 0.1083      | 7.81904      | 1.10814      | 1.2371  |

Totals : 632.02759 96.50547

Signal 2: DAD1 B, Sig=254,16 Ref=off

| Peak # | RetTime [min] | Type | Width [min] | Area [mAU*s] | Height [mAU] | Area %  |
|--------|---------------|------|-------------|--------------|--------------|---------|
| 1      | 18.127        | BB   | 0.0974      | 27.72689     | 4.40723      | 4.3001  |
| 2      | 20.755        | BV   | 0.0852      | 10.39476     | 1.91779      | 1.6121  |
| 3      | 20.923        | VV   | 0.1029      | 598.92731    | 90.91395     | 92.8865 |
| 4      | 22.549        | BB   | 0.1084      | 7.74590      | 1.09634      | 1.2013  |

Totals : 644.79486 98.33531

Signal 3: DAD1 C, Sig=210,8 Ref=off

| Peak # | RetTime [min] | Type | Width [min] | Area [mAU*s] | Height [mAU] | Area %  |
|--------|---------------|------|-------------|--------------|--------------|---------|
| 1      | 13.885        | BB   | 0.0883      | 6.42959      | 1.13223      | 0.3603  |
| 2      | 14.683        | BB   | 0.1255      | 9.13448      | 1.04989      | 0.5119  |
| 3      | 18.127        | BB   | 0.1134      | 111.79525    | 14.58452     | 6.2650  |
| 4      | 19.043        | BV   | 0.1023      | 12.28498     | 1.83074      | 0.6884  |
| 5      | 19.260        | VV   | 0.1059      | 25.93017     | 3.69388      | 1.4531  |
| 6      | 19.449        | VV   | 0.1173      | 10.99650     | 1.40448      | 0.6162  |
| 7      | 19.667        | VB   | 0.1030      | 7.81470      | 1.15372      | 0.4379  |
| 8      | 20.535        | BB   | 0.1283      | 24.38312     | 2.62631      | 1.3664  |
| 9      | 20.748        | BV   | 0.0844      | 22.24938     | 4.16101      | 1.2468  |
| 10     | 20.923        | VV   | 0.1024      | 1471.93042   | 224.68059    | 82.4866 |
| 11     | 21.294        | VB   | 0.1225      | 16.36377     | 1.89992      | 0.9170  |
| 12     | 22.989        | BB   | 0.0973      | 11.10314     | 1.76728      | 0.6222  |
| 13     | 25.555        | BB   | 0.1172      | 15.61706     | 2.09044      | 0.8752  |
| 14     | 27.171        | BB   | 0.2373      | 26.69373     | 1.71804      | 1.4959  |
| 15     | 27.805        | BB   | 0.1501      | 11.72167     | 1.21965      | 0.6569  |

Totals : 1784.44796 265.01271

Data File C:\Chem32\1\Data\NHC\KGP483-Repurified-20160628.D  
Sample Name: KGP483-Repurified-20160628

Signal 4: DAD1 D, Sig=230,16 Ref=off

| Peak # | RetTime [min] | Type | Width [min] | Area [mAU*s] | Height [mAU] | Area %  |
|--------|---------------|------|-------------|--------------|--------------|---------|
| 1      | 18.127        | BB   | 0.1033      | 71.34565     | 10.49653     | 5.0712  |
| 2      | 19.049        | BV   | 0.1174      | 9.14095      | 1.16693      | 0.6497  |
| 3      | 19.259        | VV   | 0.1052      | 15.23248     | 2.18955      | 1.0827  |
| 4      | 20.537        | BB   | 0.1186      | 9.69208      | 1.14647      | 0.6889  |
| 5      | 20.749        | BV   | 0.0854      | 25.20602     | 4.63971      | 1.7916  |
| 6      | 20.923        | VB   | 0.1026      | 1268.52246   | 193.30789    | 90.1650 |
| 7      | 21.293        | BV   | 0.0905      | 7.75009      | 1.32033      | 0.5509  |

Totals : 1406.88974 214.26741

Signal 5: DAD1 E, Sig=240,4 Ref=off

| Peak # | RetTime [min] | Type | Width [min] | Area [mAU*s] | Height [mAU] | Area %  |
|--------|---------------|------|-------------|--------------|--------------|---------|
| 1      | 18.127        | BB   | 0.1068      | 25.16262     | 3.54622      | 2.5109  |
| 2      | 20.749        | BV   | 0.0865      | 20.52419     | 3.70993      | 2.0481  |
| 3      | 20.923        | VB   | 0.1026      | 956.43463    | 145.60522    | 95.4410 |

Totals : 1002.12143 152.86138

Signal 6: DAD1 F, Sig=280,16 Ref=off

| Peak # | RetTime [min] | Type | Width [min] | Area [mAU*s] | Height [mAU] | Area %  |
|--------|---------------|------|-------------|--------------|--------------|---------|
| 1      | 18.127        | BB   | 0.0966      | 40.78636     | 6.55303      | 9.0081  |
| 2      | 19.258        | BB   | 0.0897      | 6.65932      | 1.18173      | 1.4708  |
| 3      | 20.923        | BV   | 0.1032      | 405.33044    | 61.26882     | 89.5212 |

Totals : 452.77612 69.00358

Signal 7: DAD1 G, Sig=300,16 Ref=off

| Peak # | RetTime [min] | Type | Width [min] | Area [mAU*s] | Height [mAU] | Area %  |
|--------|---------------|------|-------------|--------------|--------------|---------|
| 1      | 18.127        | BB   | 0.0949      | 14.47020     | 2.38239      | 9.8791  |
| 2      | 19.259        | BB   | 0.0963      | 9.02615      | 1.45748      | 6.1623  |
| 3      | 20.923        | VB   | 0.1026      | 122.97638    | 18.74084     | 83.9586 |

Totals : 146.47272 22.58071

Data File C:\Chem32\1\Data\NHC\KGP483-Repurified-20160628.D  
Sample Name: KGP483-Repurified-20160628

Signal 8: DAD1 H, Sig=320,16 Ref=off

| Peak # | RetTime [min] | Type | Width [min] | Area [mAU*s] | Height [mAU] | Area %   |
|--------|---------------|------|-------------|--------------|--------------|----------|
| 1      | 20.923        | VB   | 0.1028      | 74.78910     | 11.35700     | 100.0000 |

Totals :                    74.78910   11.35700

=====  
\*\*\* End of Report \*\*\*

20. 3-methoxy-9-(3,4,5-trimethoxyphenyl)-6,7-dihydro-5H-benzo[7]annulene-4-carbaldehyde

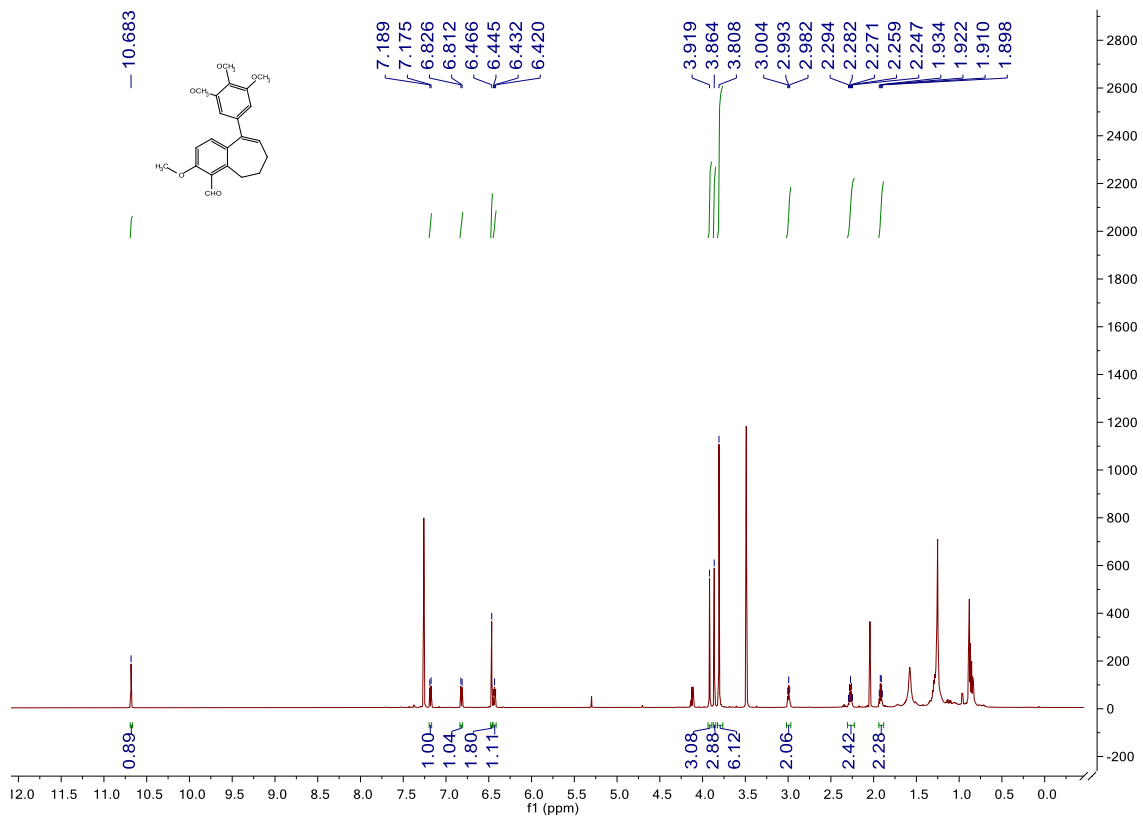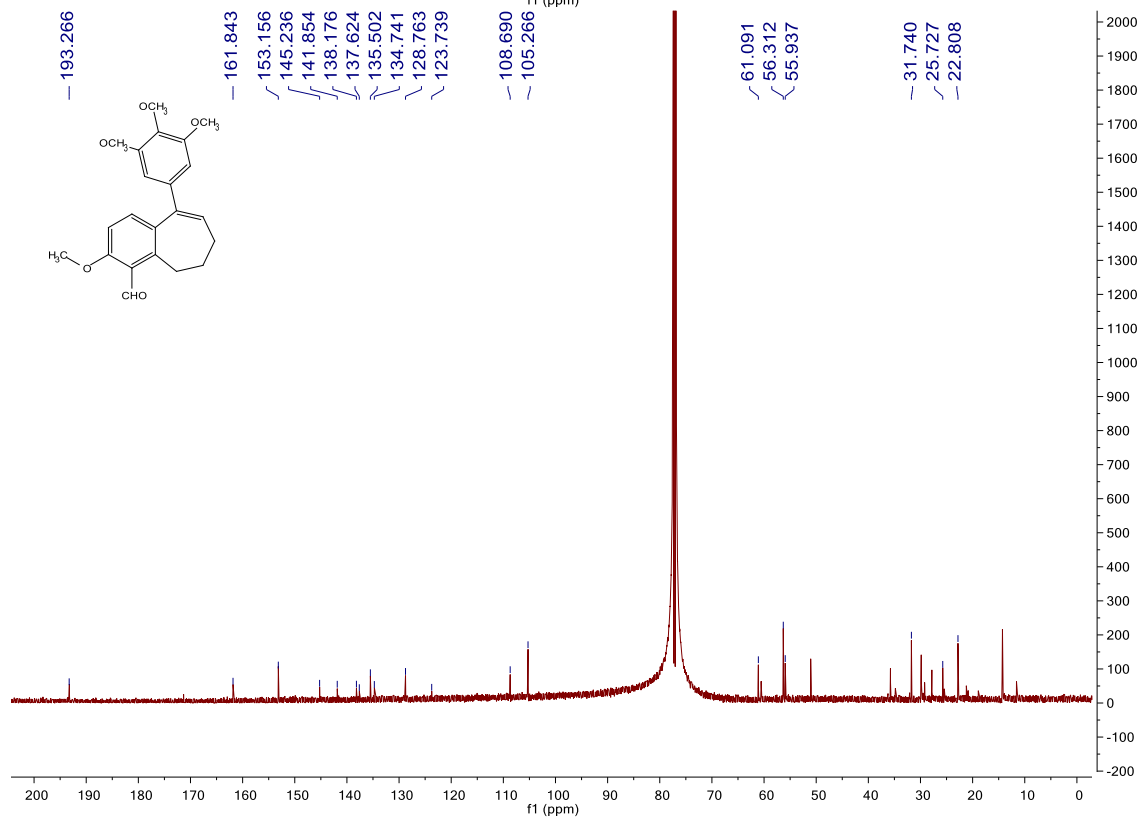

NHC\_4\_89\_aldehyde\_Cali #2-17 RT: 0.01-0.15 AV: 16 NL: 8.06E6  
T: FTMS + p ESI Full ms [200.00-1000.00]

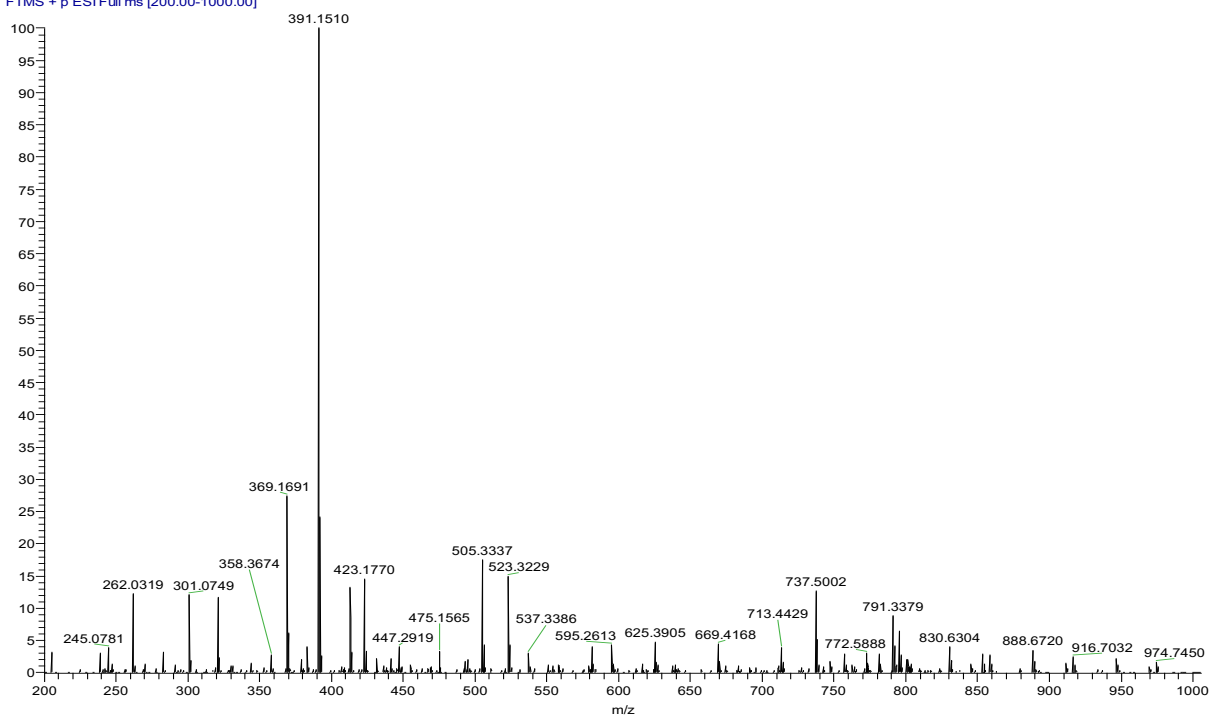





Data File C:\Chem32\1\Data\NHC\NHC\_4\_123\_sample.D  
Sample Name: NHC\_4\_123\_sample

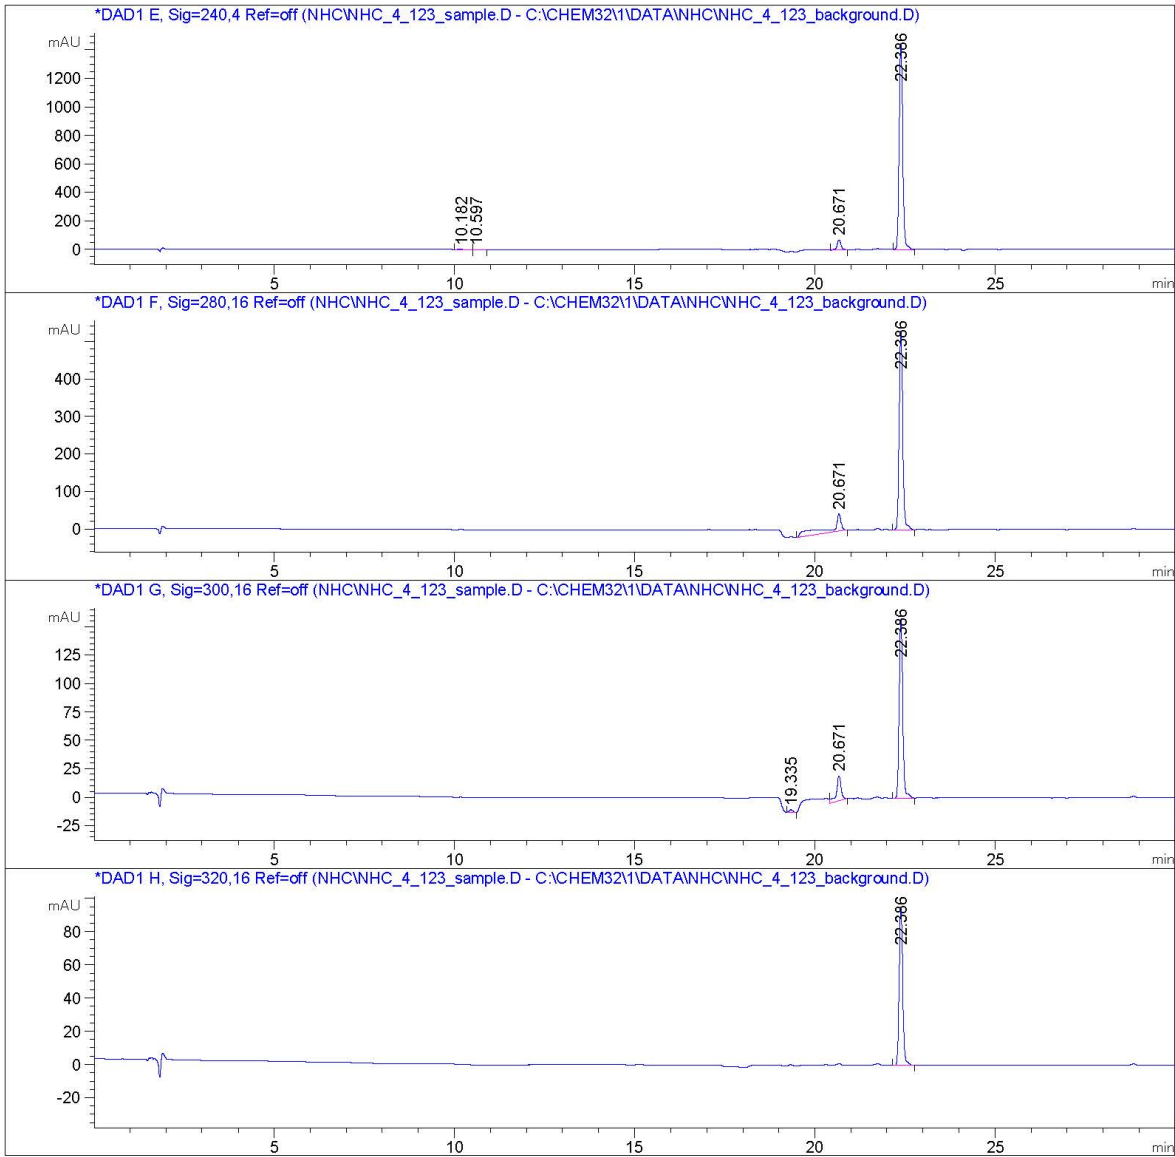

=====  
Area Percent Report  
=====

Sorted By : Signal  
Multiplier : 1.0000  
Dilution : 1.0000  
Use Multiplier & Dilution Factor with ISTDs

Data File C:\Chem32\1\Data\NHC\NHC\_4\_123\_sample.D  
Sample Name: NHC\_4\_123\_sample

Signal 1: DAD1 A, Sig=254,4 Ref=off  
Signal has been modified after loading from rawdata file!

| Peak # | RetTime [min] | Type | Width [min] | Area [mAU*s] | Height [mAU] | Area %  |
|--------|---------------|------|-------------|--------------|--------------|---------|
| 1      | 20.671        | BB   | 0.1050      | 433.03525    | 63.92846     | 4.4639  |
| 2      | 22.386        | VV   | 0.1071      | 9267.71973   | 1333.79065   | 95.5361 |

Totals : 9700.75497 1397.71911

Signal 2: DAD1 B, Sig=254,16 Ref=off  
Signal has been modified after loading from rawdata file!

| Peak # | RetTime [min] | Type | Width [min] | Area [mAU*s] | Height [mAU] | Area %  |
|--------|---------------|------|-------------|--------------|--------------|---------|
| 1      | 20.671        | BB   | 0.1051      | 416.58456    | 61.43745     | 4.3303  |
| 2      | 22.386        | VV   | 0.1070      | 9203.54297   | 1325.31763   | 95.6697 |

Totals : 9620.12753 1386.75507

Signal 3: DAD1 C, Sig=210,8 Ref=off  
Signal has been modified after loading from rawdata file!

| Peak # | RetTime [min] | Type | Width [min] | Area [mAU*s] | Height [mAU] | Area %  |
|--------|---------------|------|-------------|--------------|--------------|---------|
| 1      | 20.671        | BV   | 0.1057      | 1161.26270   | 170.09296    | 10.8772 |
| 2      | 22.386        | VB   | 0.1079      | 9514.88281   | 1356.19568   | 89.1228 |

Totals : 1.06761e4 1526.28864

Signal 4: DAD1 D, Sig=230,16 Ref=off  
Signal has been modified after loading from rawdata file!

| Peak # | RetTime [min] | Type | Width [min] | Area [mAU*s] | Height [mAU] | Area %  |
|--------|---------------|------|-------------|--------------|--------------|---------|
| 1      | 20.671        | BB   | 0.1049      | 739.92719    | 109.43777    | 7.2504  |
| 2      | 22.386        | VV   | 0.1075      | 9465.35449   | 1355.30701   | 92.7496 |

Totals : 1.02053e4 1464.74478

Data File C:\Chem32\1\Data\NHC\NHC\_4\_123\_sample.D  
Sample Name: NHC\_4\_123\_sample

Signal 5: DAD1 E, Sig=240,4 Ref=off  
Signal has been modified after loading from rawdata file!

| Peak # | RetTime [min] | Type | Width [min] | Area [mAU*s] | Height [mAU] | Area %  |
|--------|---------------|------|-------------|--------------|--------------|---------|
| 1      | 10.182        | BB   | 0.1720      | 38.17877     | 2.89298      | 0.3557  |
| 2      | 10.597        | BB   | 0.1553      | 15.93288     | 1.46076      | 0.1484  |
| 3      | 20.671        | VB   | 0.1146      | 533.87170    | 70.33253     | 4.9741  |
| 4      | 22.386        | VV   | 0.1075      | 1.01450e4    | 1451.47473   | 94.5217 |

Totals : 1.07330e4 1526.16101

Signal 6: DAD1 F, Sig=280,16 Ref=off  
Signal has been modified after loading from rawdata file!

| Peak # | RetTime [min] | Type | Width [min] | Area [mAU*s] | Height [mAU] | Area %  |
|--------|---------------|------|-------------|--------------|--------------|---------|
| 1      | 20.671        | BB   | 0.2770      | 989.67731    | 45.99776     | 21.2272 |
| 2      | 22.386        | BB   | 0.1070      | 3672.63428   | 529.19031    | 78.7728 |

Totals : 4662.31158 575.18806

Signal 7: DAD1 G, Sig=300,16 Ref=off  
Signal has been modified after loading from rawdata file!

| Peak # | RetTime [min] | Type | Width [min] | Area [mAU*s] | Height [mAU] | Area %  |
|--------|---------------|------|-------------|--------------|--------------|---------|
| 1      | 19.335        | BB   | 0.1093      | 15.72323     | 2.25735      | 1.2006  |
| 2      | 20.671        | VB   | 0.1297      | 194.43983    | 21.88058     | 14.8473 |
| 3      | 22.386        | BB   | 0.1073      | 1099.43250   | 157.75989    | 83.9521 |

Totals : 1309.59556 181.89782

Signal 8: DAD1 H, Sig=320,16 Ref=off  
Signal has been modified after loading from rawdata file!

| Peak # | RetTime [min] | Type | Width [min] | Area [mAU*s] | Height [mAU] | Area %   |
|--------|---------------|------|-------------|--------------|--------------|----------|
| 1      | 22.386        | BB   | 0.1064      | 658.00146    | 95.42596     | 100.0000 |

Totals : 658.00146 95.42596

=====  
\*\*\* End of Report \*\*\*

## 22. 2-bromo-3-methoxybenzaldehyde

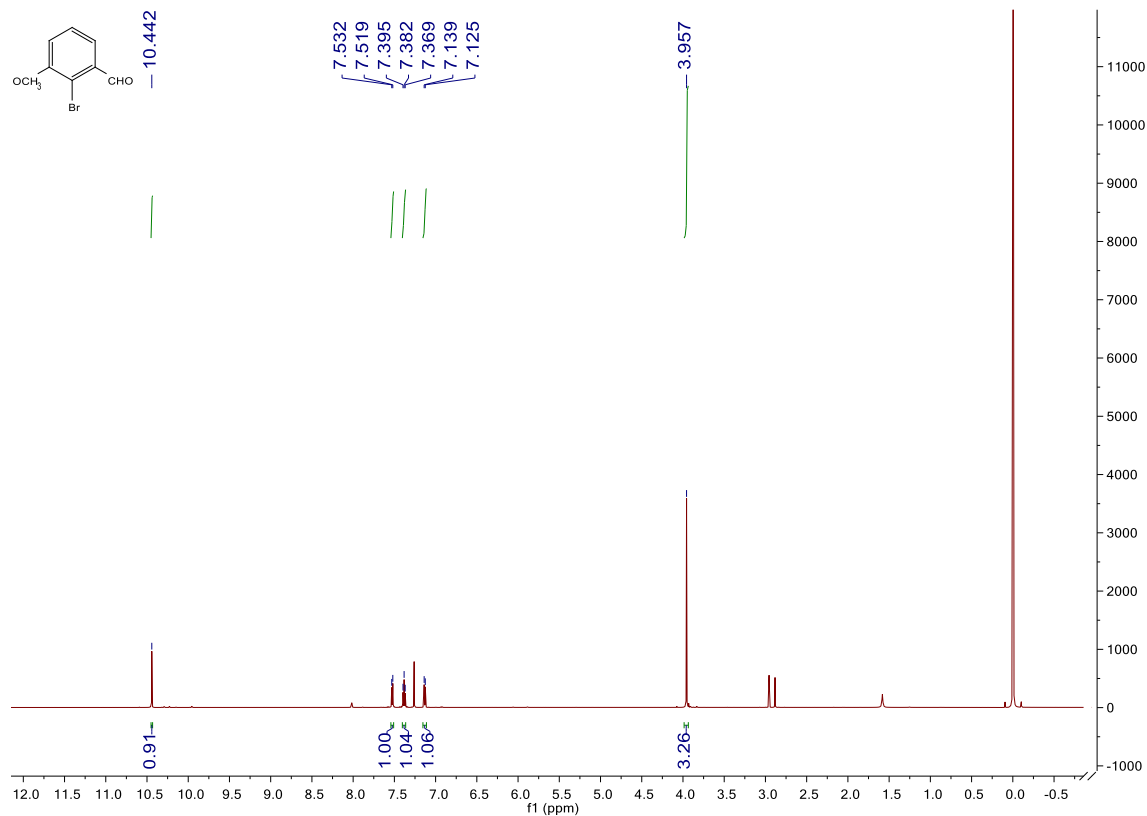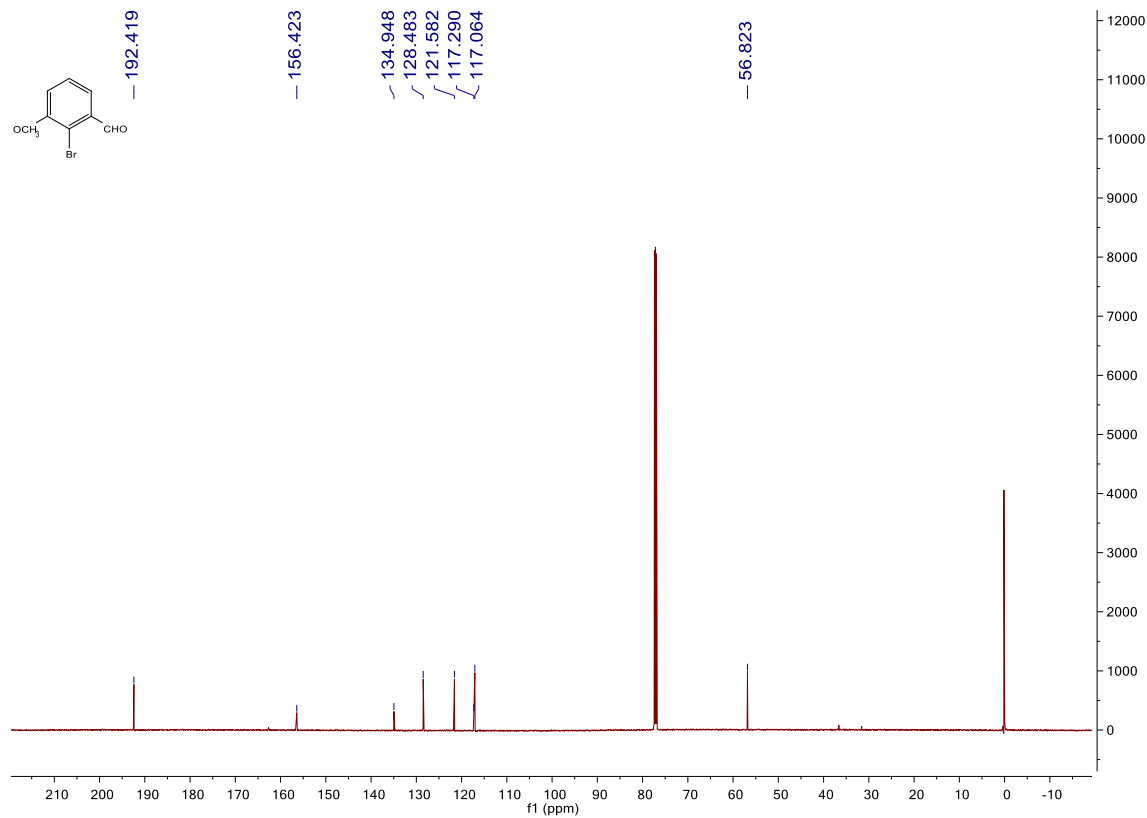

24. methyl 5-(2-bromo-3-methoxyphenyl)pentanoate

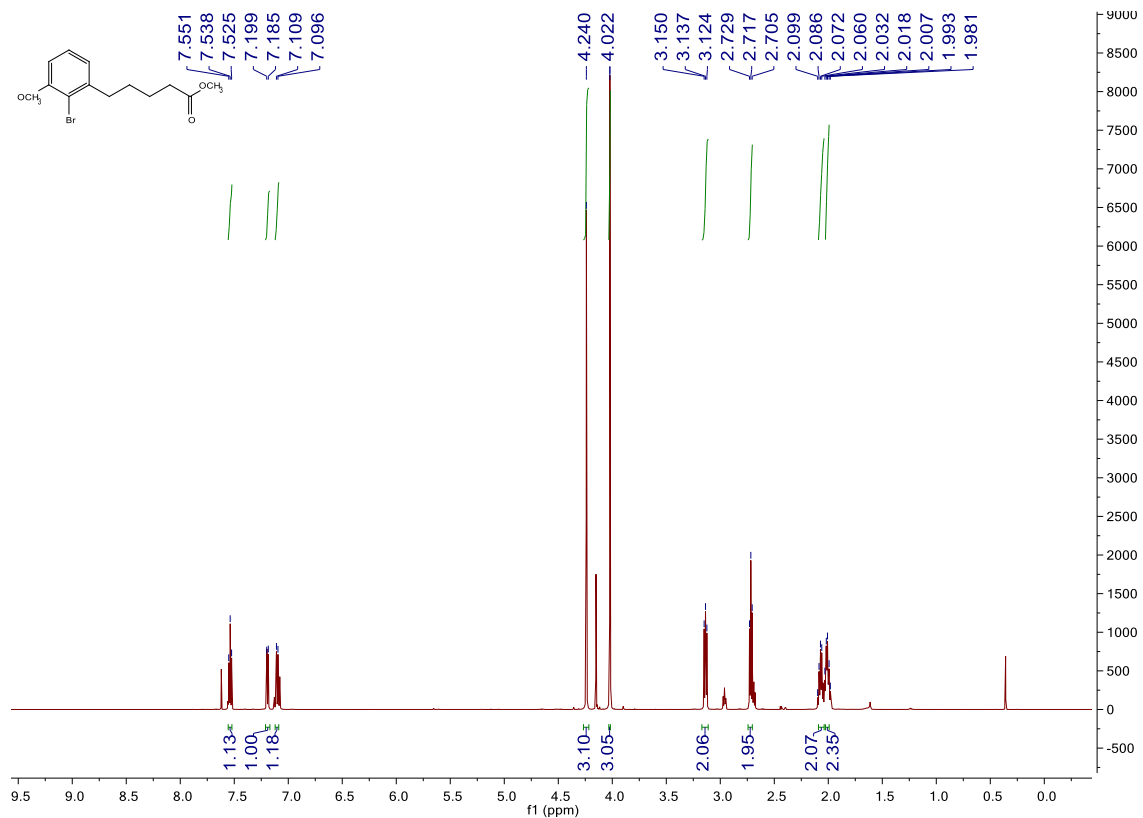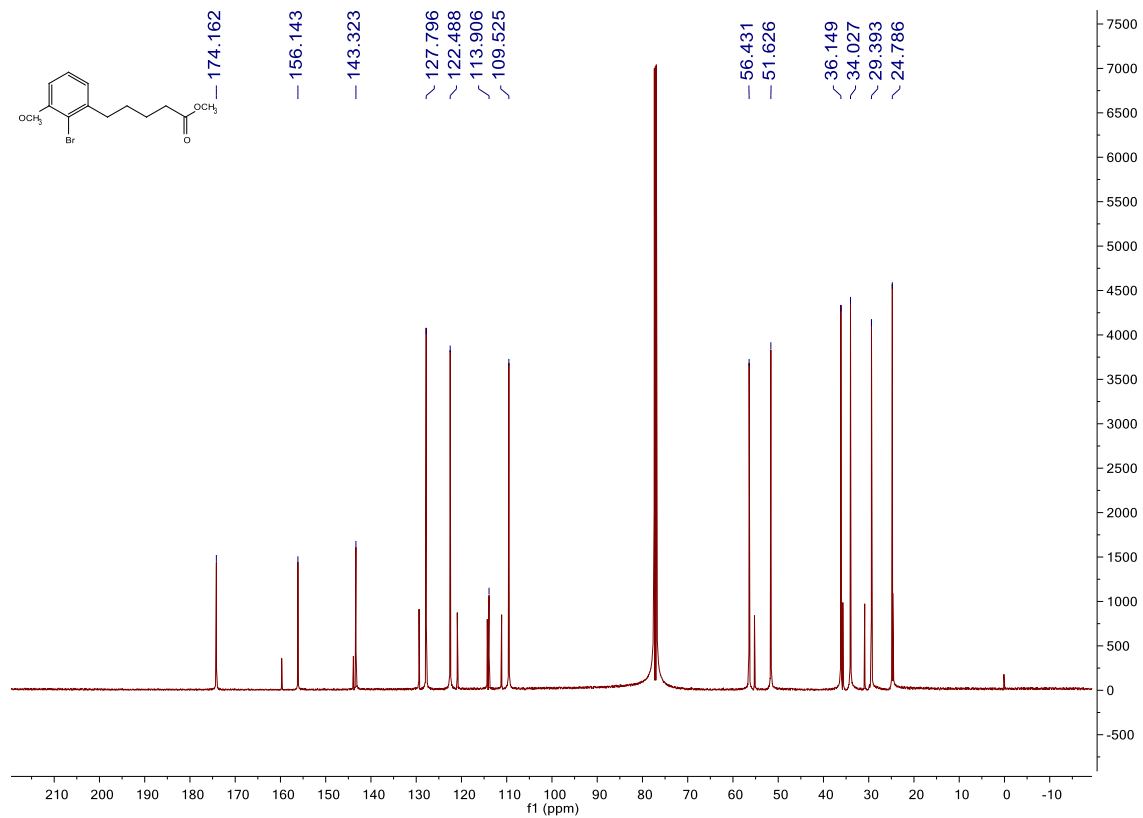

25. 1-bromo-2-methoxy-6,7,8,9-tetrahydro-5H-benzo[7]annulen-5-one

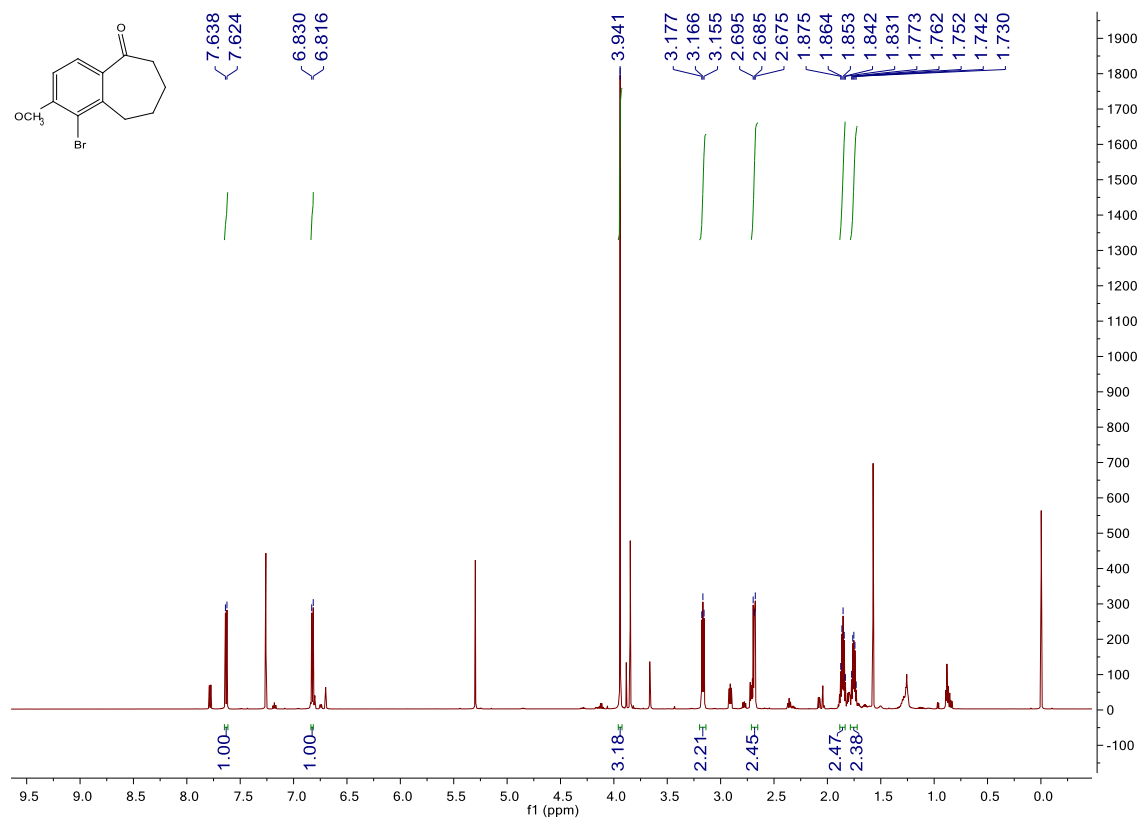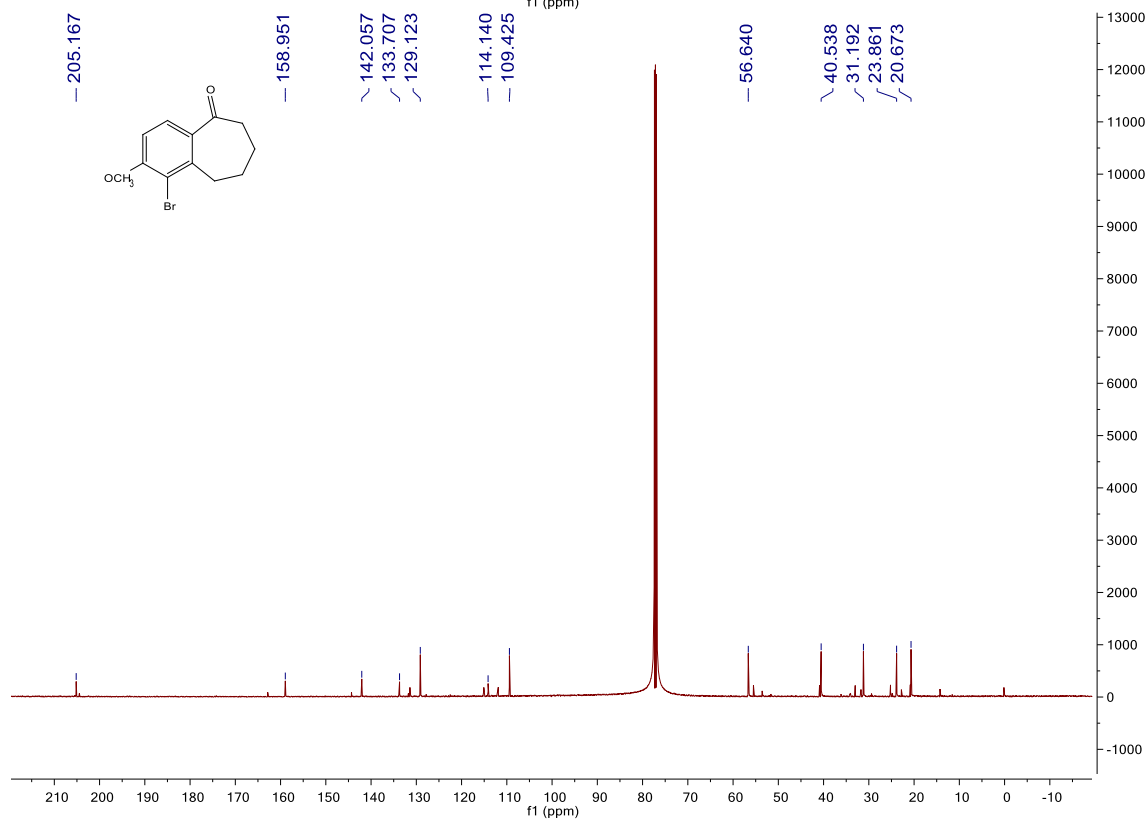

26. 4-bromo-3-methoxy-9-(3,4,5-trimethoxyphenyl)-6,7-dihydro-5H-benzo[7]annulene

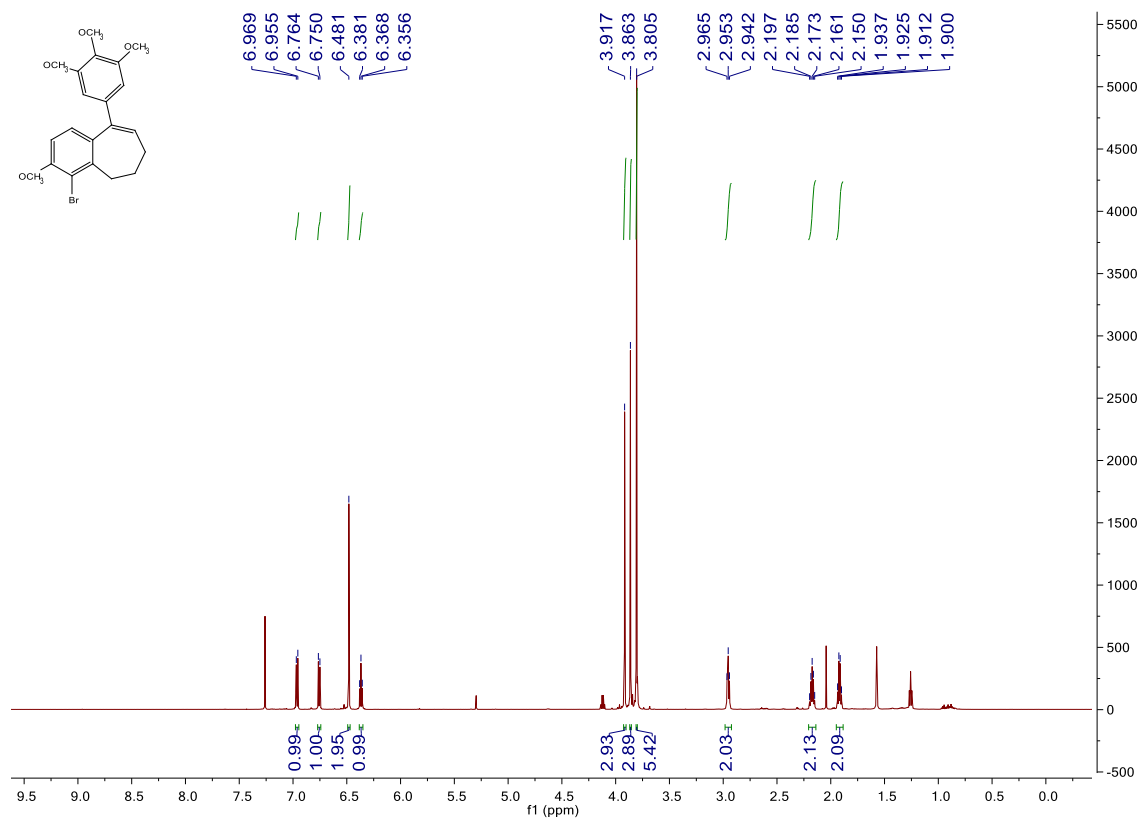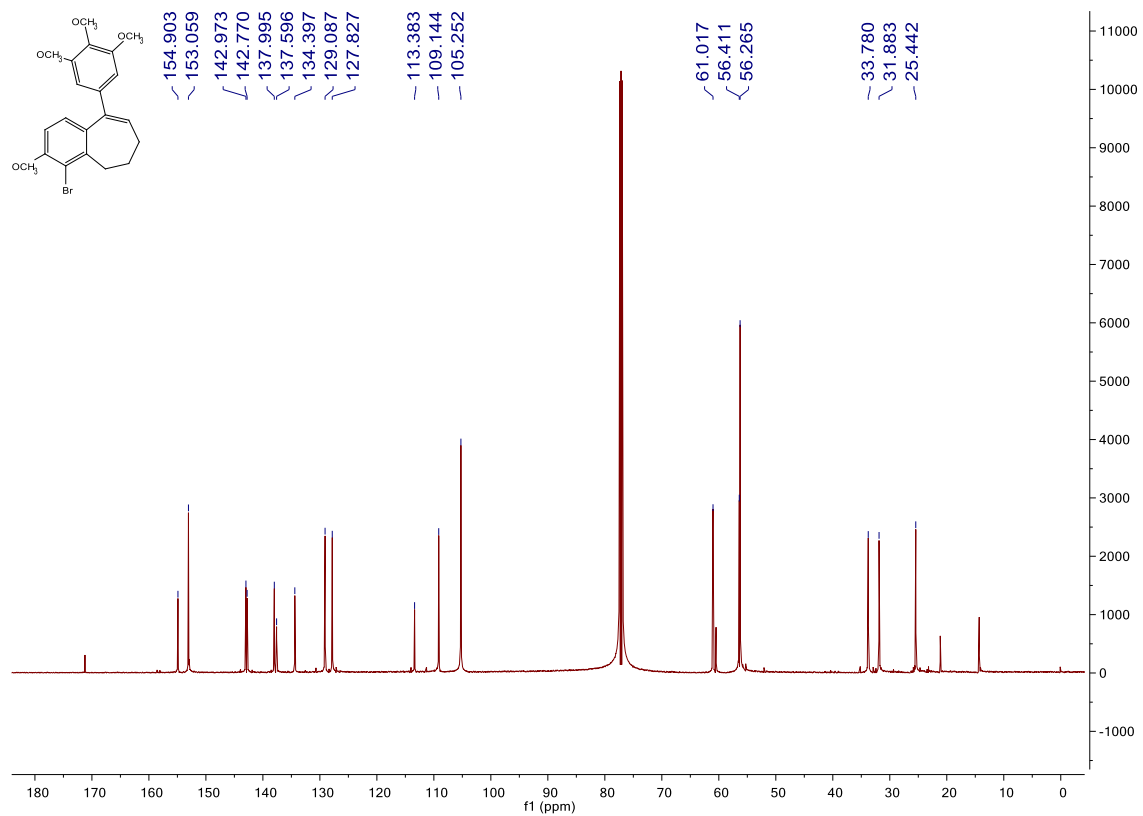

27. ethyl 3-methoxy-9-(3,4,5-trimethoxyphenyl)-6,7-dihydro-5H-benzo[7]annulene-4-carboxylate

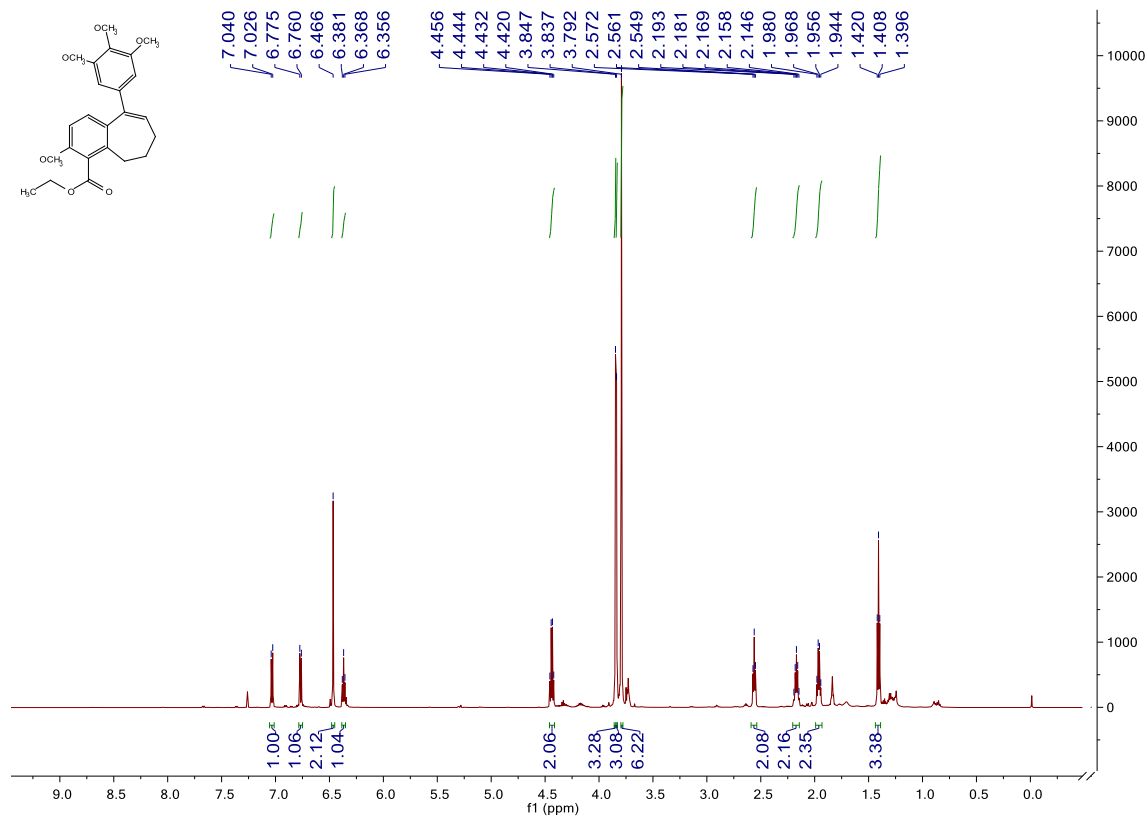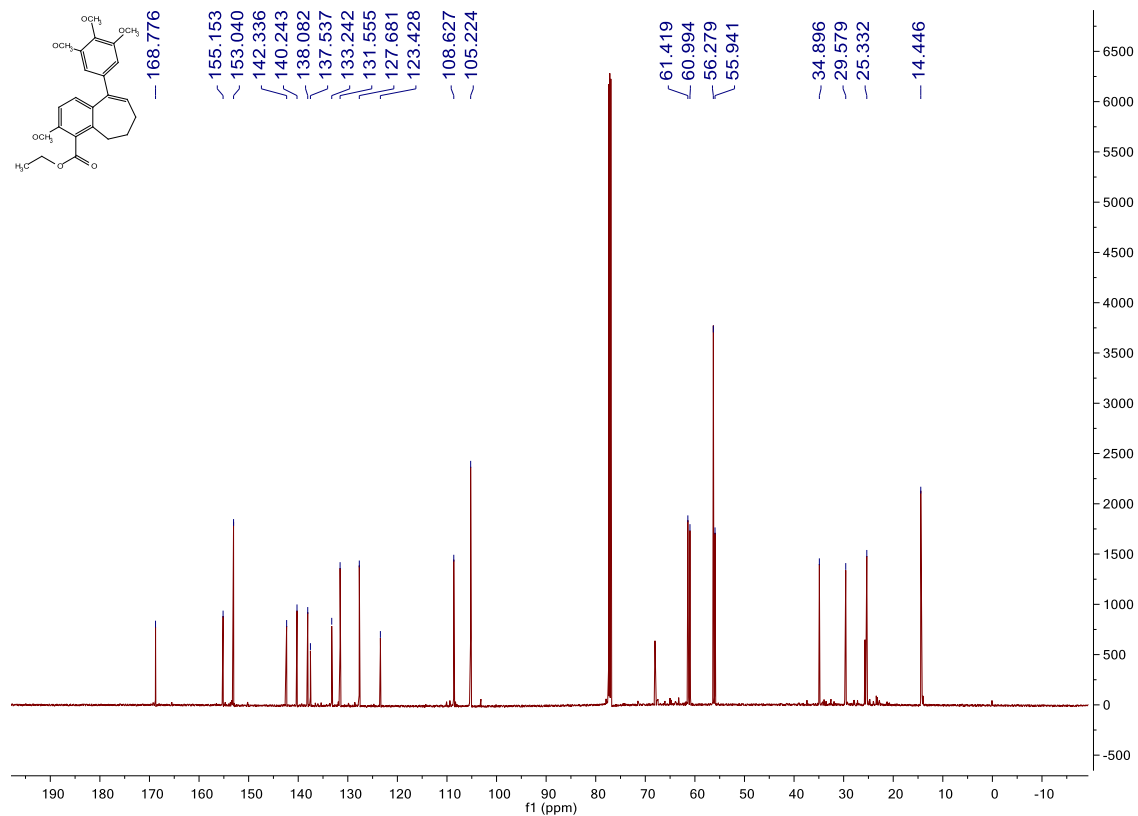



NHC\_3\_86\_F2\_Orbi+ESI #2-42 RT: 0.01-0.37 AV: 41 NL: 4.59E6  
T: FTMS + p ESI Full ms [200.00-800.00]

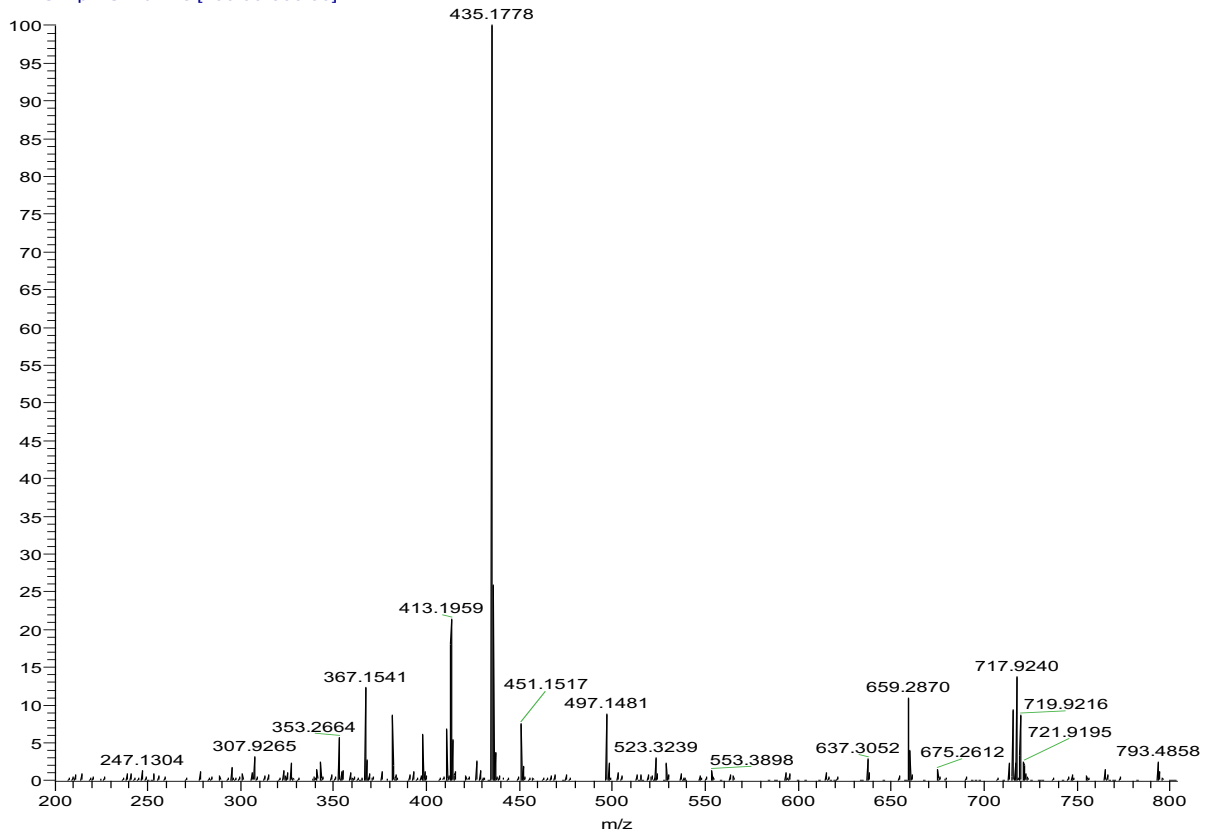

=====

Acq. Operator : SYSTEM  
Sample Operator : SYSTEM  
Acq. Instrument : 1200 HPLC Location : 1  
Injection Date : 2/28/2018 1:25:24 PM  
Inj Volume : No inj

Acq. Method : C:\CHEM32\1\METHODS\MASTERMETHOD2.M  
Last changed : 12/2/2015 12:37:42 PM by Eric Lin  
Analysis Method : C:\CHEM32\1\METHODS\RT-ACNWASH 2.M  
Last changed : 7/9/2015 2:27:22 PM by Blake  
Method Info : General Column Wash Method

Sample Info : 20180228

Additional Info : Peak(s) manually integrated

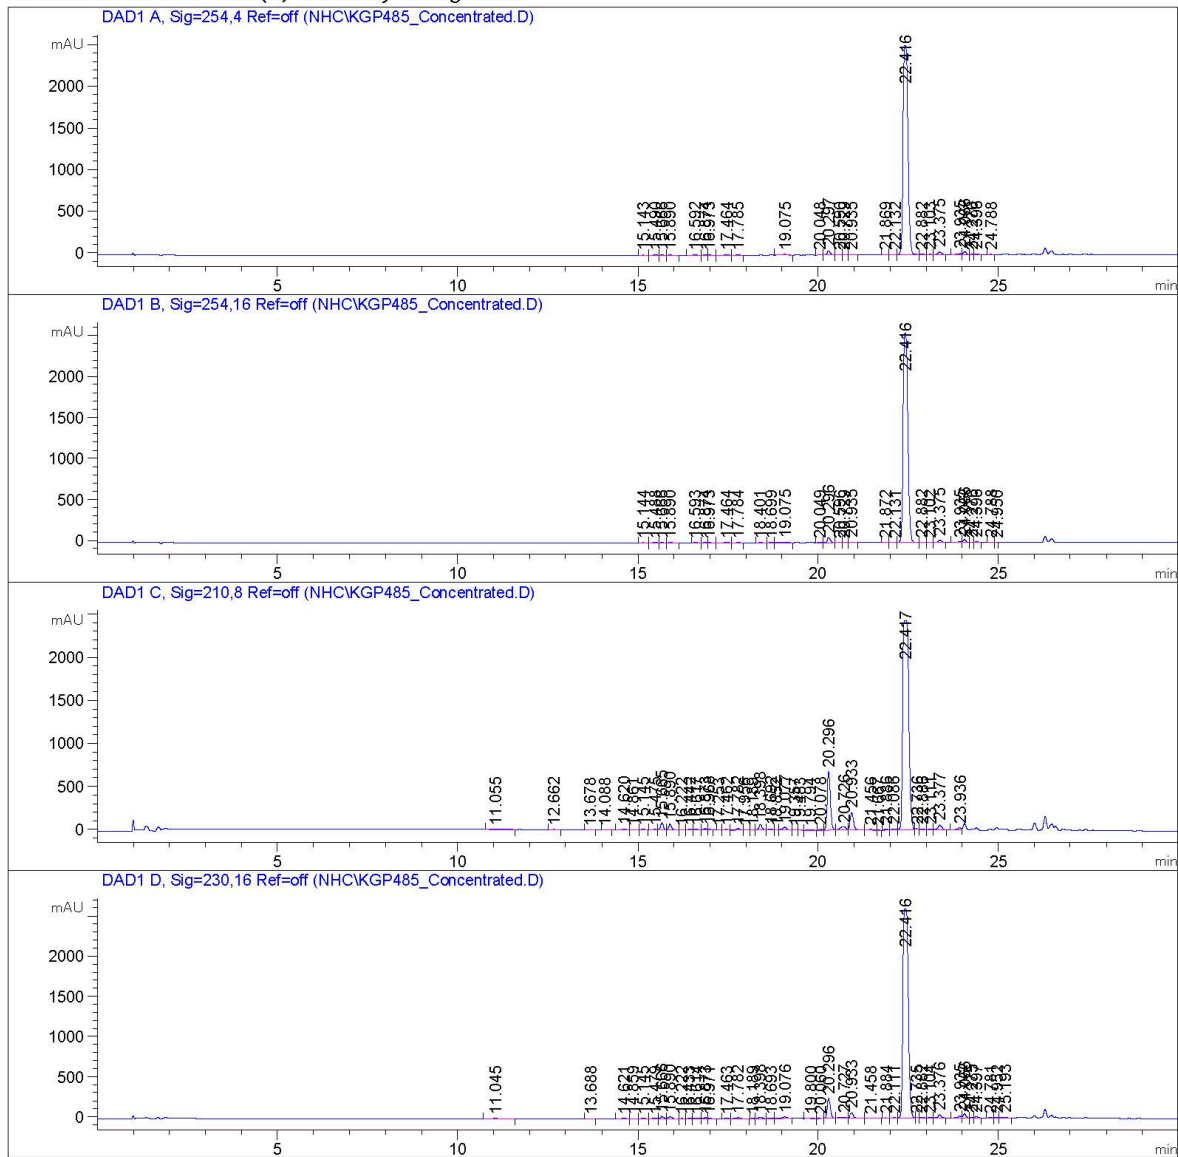

Data File C:\Chem32\1\Data\NHC\KGP485\_Concentrated.D  
 Sample Name: KGP485\_Concentrated

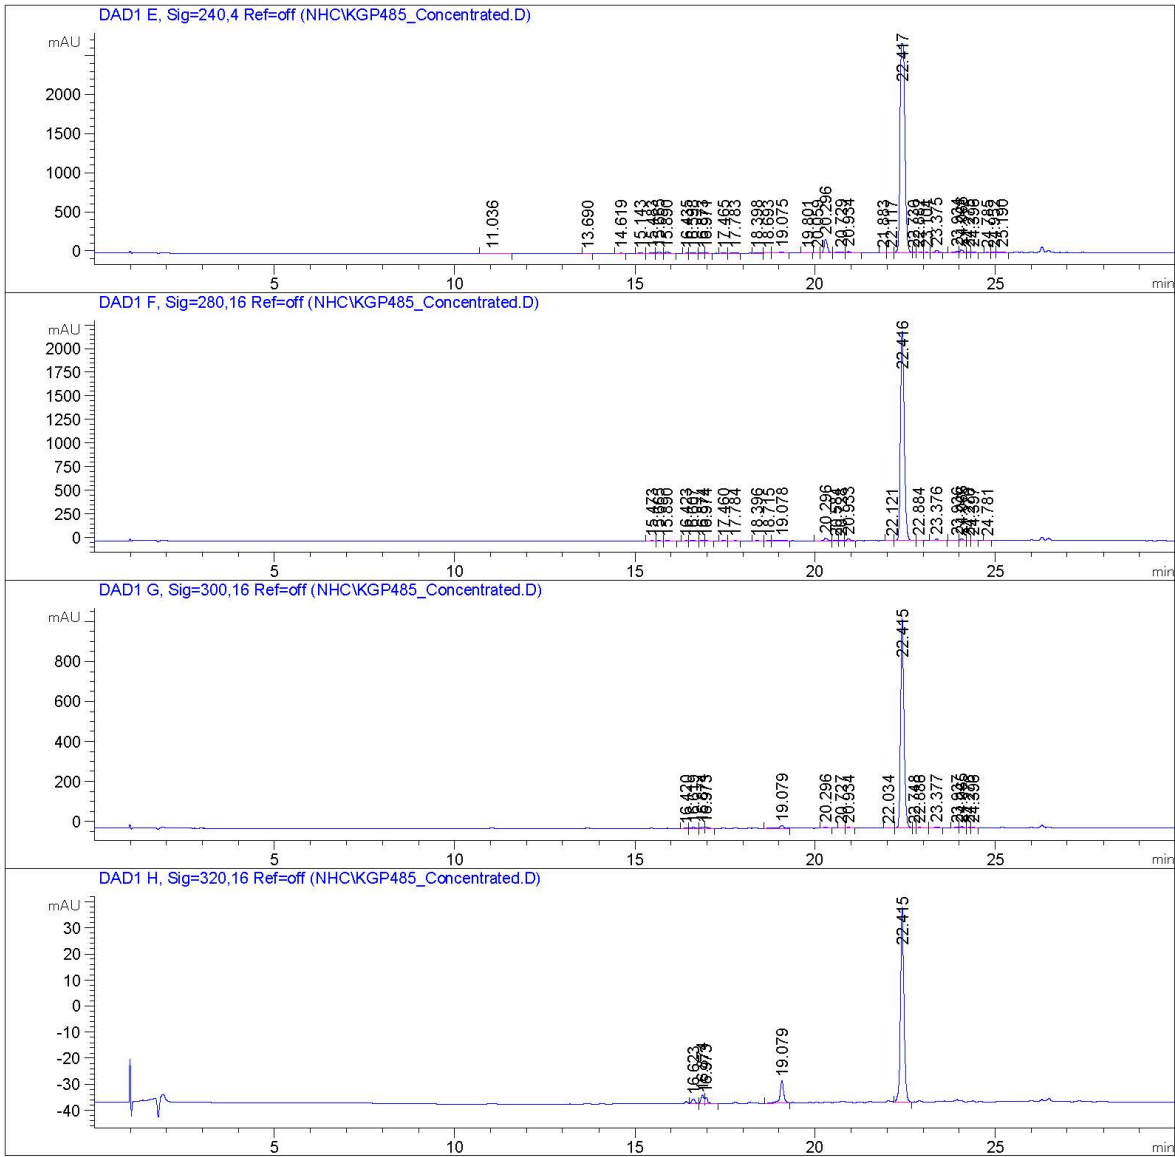

=====  
 Area Percent Report  
 =====

Sorted By : Signal  
 Multiplier : 1.0000  
 Dilution : 1.0000  
 Use Multiplier & Dilution Factor with ISTDs

Data File C:\Chem32\1\Data\NHC\KGP485\_Concentrated.D  
 Sample Name: KGP485\_Concentrated

Signal 1: DAD1 A, Sig=254,4 Ref=off

| Peak # | RetTime [min] | Type | Width [min] | Area [mAU*s] | Height [mAU] | Area %  |
|--------|---------------|------|-------------|--------------|--------------|---------|
| 1      | 15.143        | BB   | 0.0934      | 8.33023      | 1.40075      | 0.0331  |
| 2      | 15.490        | BV   | 0.1346      | 19.58883     | 2.31746      | 0.0779  |
| 3      | 15.666        | VV   | 0.0866      | 13.02673     | 2.35240      | 0.0518  |
| 4      | 15.890        | VB   | 0.0998      | 14.21835     | 2.13269      | 0.0565  |
| 5      | 16.592        | BV   | 0.1322      | 14.25762     | 1.62774      | 0.0567  |
| 6      | 16.874        | VV   | 0.0833      | 11.05103     | 1.97438      | 0.0439  |
| 7      | 16.973        | VB   | 0.0832      | 7.92460      | 1.41708      | 0.0315  |
| 8      | 17.464        | BB   | 0.1036      | 24.72286     | 3.53347      | 0.0983  |
| 9      | 17.785        | BB   | 0.0990      | 12.09403     | 1.88184      | 0.0481  |
| 10     | 19.075        | BB   | 0.1148      | 54.89812     | 7.05413      | 0.2182  |
| 11     | 20.048        | BV   | 0.0942      | 6.91471      | 1.14876      | 0.0275  |
| 12     | 20.297        | VB   | 0.0954      | 317.10803    | 51.84093     | 1.2603  |
| 13     | 20.590        | BV   | 0.1084      | 31.91162     | 4.40917      | 0.1268  |
| 14     | 20.729        | VV   | 0.1084      | 32.33943     | 4.46839      | 0.1285  |
| 15     | 20.935        | VB   | 0.1010      | 31.78071     | 4.81521      | 0.1263  |
| 16     | 21.869        | BB   | 0.0924      | 8.85594      | 1.55649      | 0.0352  |
| 17     | 22.132        | BV   | 0.1201      | 17.63049     | 2.23430      | 0.0701  |
| 18     | 22.416        | VV   | 0.1498      | 2.37362e4    | 2522.00586   | 94.3347 |
| 19     | 22.882        | VV   | 0.1106      | 66.47027     | 8.95987      | 0.2642  |
| 20     | 23.103        | VV   | 0.1140      | 31.11934     | 4.12341      | 0.1237  |
| 21     | 23.375        | VV   | 0.1083      | 238.31810    | 33.79056     | 0.9471  |
| 22     | 23.935        | BV   | 0.1021      | 107.65102    | 14.93505     | 0.4278  |
| 23     | 24.066        | VB   | 0.0900      | 222.35457    | 38.15697     | 0.8837  |
| 24     | 24.276        | BV   | 0.0744      | 37.09813     | 7.67267      | 0.1474  |
| 25     | 24.396        | VB   | 0.0917      | 78.43112     | 13.13635     | 0.3117  |
| 26     | 24.788        | BB   | 0.0955      | 17.38949     | 3.00463      | 0.0691  |

Totals : 2.51616e4 2741.95056

Signal 2: DAD1 B, Sig=254,16 Ref=off

| Peak # | RetTime [min] | Type | Width [min] | Area [mAU*s] | Height [mAU] | Area % |
|--------|---------------|------|-------------|--------------|--------------|--------|
| 1      | 15.144        | BB   | 0.0915      | 9.29218      | 1.56085      | 0.0371 |
| 2      | 15.488        | BV   | 0.1338      | 18.43984     | 2.19968      | 0.0736 |
| 3      | 15.666        | VB   | 0.0863      | 18.93161     | 3.43537      | 0.0755 |
| 4      | 15.890        | BB   | 0.0953      | 19.25417     | 3.06369      | 0.0768 |
| 5      | 16.593        | VV   | 0.1209      | 14.35085     | 1.84228      | 0.0572 |
| 6      | 16.874        | VV   | 0.0850      | 13.25696     | 2.30894      | 0.0529 |
| 7      | 16.973        | VB   | 0.0825      | 9.07843      | 1.64111      | 0.0362 |
| 8      | 17.464        | BB   | 0.1044      | 24.08924     | 3.40893      | 0.0961 |
| 9      | 17.784        | BB   | 0.0996      | 13.88108     | 2.14120      | 0.0554 |
| 10     | 18.401        | VV   | 0.1121      | 7.61204      | 1.00774      | 0.0304 |
| 11     | 18.699        | VV   | 0.1006      | 7.69934      | 1.17225      | 0.0307 |
| 12     | 19.075        | VB   | 0.1212      | 63.89308     | 7.67159      | 0.2549 |
| 13     | 20.049        | BV   | 0.0976      | 7.32312      | 1.19334      | 0.0292 |
| 14     | 20.296        | VB   | 0.0952      | 388.06714    | 63.54612     | 1.5479 |
| 15     | 20.596        | BV   | 0.1111      | 32.03711     | 4.39342      | 0.1278 |

Data File C:\Chem32\1\Data\NHC\KGP485\_Concentrated.D  
 Sample Name: KGP485\_Concentrated

| Peak # | RetTime [min] | Type | Width [min] | Area [mAU*s] | Height [mAU] | Area %  |
|--------|---------------|------|-------------|--------------|--------------|---------|
| 16     | 20.729        | VV   | 0.1076      | 38.02944     | 5.18166      | 0.1517  |
| 17     | 20.935        | VB   | 0.1000      | 37.83025     | 5.80485      | 0.1509  |
| 18     | 21.872        | BB   | 0.0948      | 9.74633      | 1.70142      | 0.0389  |
| 19     | 22.131        | BV   | 0.1203      | 17.17916     | 2.17097      | 0.0685  |
| 20     | 22.416        | VV   | 0.1475      | 2.35526e4    | 2555.71948   | 93.9472 |
| 21     | 22.882        | VV   | 0.1101      | 64.40833     | 8.72951      | 0.2569  |
| 22     | 23.102        | VV   | 0.1139      | 29.15085     | 3.86712      | 0.1163  |
| 23     | 23.375        | VV   | 0.1086      | 223.20885    | 31.51183     | 0.8903  |
| 24     | 23.935        | BV   | 0.1025      | 106.19034    | 14.65690     | 0.4236  |
| 25     | 24.066        | VB   | 0.0900      | 211.35193    | 36.27748     | 0.8430  |
| 26     | 24.276        | BV   | 0.0747      | 36.76686     | 7.55985      | 0.1467  |
| 27     | 24.396        | VB   | 0.0916      | 74.12943     | 12.42585     | 0.2957  |
| 28     | 24.788        | BB   | 0.0922      | 16.13047     | 2.84184      | 0.0643  |
| 29     | 24.950        | BV   | 0.0666      | 6.11324      | 1.40885      | 0.0244  |

Totals : 2.50700e4 2790.44412

Signal 3: DAD1 C, Sig=210,8 Ref=off

| Peak # | RetTime [min] | Type | Width [min] | Area [mAU*s] | Height [mAU] | Area %  |
|--------|---------------|------|-------------|--------------|--------------|---------|
| 1      | 11.055        | BB   | 0.1966      | 36.57398     | 2.87157      | 0.0976  |
| 2      | 12.662        | BB   | 0.1116      | 12.97379     | 1.68982      | 0.0346  |
| 3      | 13.678        | BV   | 0.1316      | 16.00774     | 1.87440      | 0.0427  |
| 4      | 14.088        | BB   | 0.1459      | 10.34158     | 1.20807      | 0.0276  |
| 5      | 14.620        | BV   | 0.0955      | 74.50301     | 11.82868     | 0.1989  |
| 6      | 14.861        | VB   | 0.1026      | 18.75695     | 2.78270      | 0.0501  |
| 7      | 15.145        | BB   | 0.0912      | 52.52161     | 9.12137      | 0.1402  |
| 8      | 15.475        | BV   | 0.1205      | 35.56589     | 4.69095      | 0.0950  |
| 9      | 15.665        | VV   | 0.0875      | 490.90030    | 87.41347     | 1.3106  |
| 10     | 15.890        | VB   | 0.0884      | 391.59515    | 68.81618     | 1.0455  |
| 11     | 16.222        | BB   | 0.0792      | 21.70162     | 4.42820      | 0.0579  |
| 12     | 16.442        | BV   | 0.1021      | 43.47946     | 6.84939      | 0.1161  |
| 13     | 16.617        | VV   | 0.1246      | 67.78275     | 7.86437      | 0.1810  |
| 14     | 16.873        | VV   | 0.0959      | 106.51293    | 16.36972     | 0.2844  |
| 15     | 16.968        | VB   | 0.0688      | 47.62775     | 10.52875     | 0.1272  |
| 16     | 17.253        | BB   | 0.0607      | 5.19991      | 1.35574      | 0.0139  |
| 17     | 17.462        | BB   | 0.0851      | 34.02348     | 6.28659      | 0.0908  |
| 18     | 17.782        | BV   | 0.1142      | 143.01854    | 18.50416     | 0.3818  |
| 19     | 17.956        | VB   | 0.0971      | 8.89701      | 1.31285      | 0.0238  |
| 20     | 18.189        | BV   | 0.0859      | 11.31681     | 2.00217      | 0.0302  |
| 21     | 18.398        | VB   | 0.0962      | 422.01907    | 68.17153     | 1.1267  |
| 22     | 18.692        | BV   | 0.1024      | 104.86539    | 15.59619     | 0.2800  |
| 23     | 18.852        | VV   | 0.0790      | 27.79159     | 5.14861      | 0.0742  |
| 24     | 19.077        | VB   | 0.1125      | 280.21582    | 36.10938     | 0.7481  |
| 25     | 19.357        | BV   | 0.0811      | 9.11958      | 1.80034      | 0.0243  |
| 26     | 19.483        | VB   | 0.1048      | 7.72842      | 1.23935      | 0.0206  |
| 27     | 19.794        | BB   | 0.1226      | 46.20218     | 5.58166      | 0.1234  |
| 28     | 20.078        | BV   | 0.1179      | 47.84826     | 6.65499      | 0.1277  |
| 29     | 20.296        | VB   | 0.0952      | 4129.25684   | 676.39777    | 11.0243 |
| 30     | 20.726        | BV   | 0.1503      | 425.86432    | 38.72407     | 1.1370  |

Data File C:\Chem32\1\Data\NHC\KGP485\_Concentrated.D  
 Sample Name: KGP485\_Concentrated

| Peak # | RetTime [min] | Type | Width [min] | Area [mAU*s] | Height [mAU] | Area %  |
|--------|---------------|------|-------------|--------------|--------------|---------|
| 31     | 20.933        | VB   | 0.0991      | 1299.64380   | 201.85574    | 3.4698  |
| 32     | 21.456        | BV   | 0.1294      | 67.31625     | 7.17869      | 0.1797  |
| 33     | 21.667        | VB   | 0.0747      | 8.72522      | 1.79655      | 0.0233  |
| 34     | 21.886        | BB   | 0.0904      | 83.43248     | 14.66684     | 0.2227  |
| 35     | 22.086        | BV   | 0.1109      | 74.13023     | 9.95198      | 0.1979  |
| 36     | 22.417        | VV   | 0.1868      | 2.79993e4    | 2422.46143   | 74.7524 |
| 37     | 22.736        | VB   | 0.0761      | 45.81138     | 9.53544      | 0.1223  |
| 38     | 22.886        | BB   | 0.0906      | 55.70490     | 10.06568     | 0.1487  |
| 39     | 23.111        | BV   | 0.0911      | 74.66079     | 12.98298     | 0.1993  |
| 40     | 23.377        | VB   | 0.1123      | 443.88904    | 58.61972     | 1.1851  |
| 41     | 23.936        | BV   | 0.0981      | 173.23309    | 25.24012     | 0.4625  |

Totals : 3.74561e4 3897.57820

Signal 4: DAD1 D, Sig=230,16 Ref=off

| Peak # | RetTime [min] | Type | Width [min] | Area [mAU*s] | Height [mAU] | Area %  |
|--------|---------------|------|-------------|--------------|--------------|---------|
| 1      | 11.045        | BB   | 0.2194      | 29.27055     | 2.06513      | 0.0933  |
| 2      | 13.688        | BB   | 0.1232      | 11.77030     | 1.53882      | 0.0375  |
| 3      | 14.621        | BV   | 0.0931      | 35.99555     | 5.90601      | 0.1147  |
| 4      | 14.859        | VB   | 0.0975      | 8.33657      | 1.32295      | 0.0266  |
| 5      | 15.145        | BB   | 0.0930      | 36.36981     | 6.14930      | 0.1159  |
| 6      | 15.479        | BV   | 0.1275      | 28.64103     | 3.57461      | 0.0913  |
| 7      | 15.666        | VV   | 0.0874      | 158.09705    | 28.22238     | 0.5039  |
| 8      | 15.890        | VB   | 0.0896      | 132.87042    | 22.94082     | 0.4235  |
| 9      | 16.222        | BB   | 0.0779      | 7.39274      | 1.54263      | 0.0236  |
| 10     | 16.433        | BV   | 0.0943      | 18.97336     | 3.14760      | 0.0605  |
| 11     | 16.614        | VV   | 0.1223      | 41.46205     | 5.13063      | 0.1322  |
| 12     | 16.873        | VV   | 0.0893      | 55.88730     | 9.14154      | 0.1781  |
| 13     | 16.971        | VB   | 0.0788      | 32.72037     | 6.27800      | 0.1043  |
| 14     | 17.463        | VB   | 0.0931      | 28.95014     | 4.89059      | 0.0923  |
| 15     | 17.782        | BB   | 0.1146      | 66.25149     | 8.53588      | 0.2112  |
| 16     | 18.189        | BV   | 0.0861      | 6.57483      | 1.16062      | 0.0210  |
| 17     | 18.398        | VB   | 0.0969      | 102.63708    | 16.42999     | 0.3272  |
| 18     | 18.693        | BV   | 0.1008      | 41.62845     | 6.32242      | 0.1327  |
| 19     | 19.076        | VB   | 0.1200      | 181.93646    | 22.11270     | 0.5799  |
| 20     | 19.800        | BB   | 0.1352      | 16.81750     | 1.97700      | 0.0536  |
| 21     | 20.060        | BV   | 0.1147      | 23.13130     | 3.26328      | 0.0737  |
| 22     | 20.296        | VB   | 0.0952      | 1519.28369   | 248.78177    | 4.8427  |
| 23     | 20.727        | BV   | 0.1617      | 180.74738    | 15.09073     | 0.5761  |
| 24     | 20.933        | VB   | 0.0982      | 441.48798    | 69.43363     | 1.4072  |
| 25     | 21.458        | BB   | 0.1728      | 33.95776     | 2.59314      | 0.1082  |
| 26     | 21.884        | BB   | 0.0884      | 24.60236     | 4.45423      | 0.0784  |
| 27     | 22.111        | BB   | 0.1204      | 20.61290     | 2.91938      | 0.0657  |
| 28     | 22.416        | BV   | 0.1660      | 2.68171e4    | 2606.61255   | 85.4789 |
| 29     | 22.735        | VB   | 0.0662      | 16.28876     | 3.78488      | 0.0519  |
| 30     | 22.882        | BB   | 0.0880      | 46.95659     | 8.55824      | 0.1497  |
| 31     | 23.104        | BV   | 0.0925      | 25.99397     | 4.56100      | 0.0829  |
| 32     | 23.376        | VB   | 0.1088      | 289.25766    | 40.76824     | 0.9220  |
| 33     | 23.935        | BV   | 0.1000      | 157.03195    | 22.33052     | 0.5005  |

Data File C:\Chem32\1\Data\NHC\KGP485\_Concentrated.D  
 Sample Name: KGP485\_Concentrated

| Peak # | RetTime [min] | Type | Width [min] | Area [mAU*s] | Height [mAU] | Area % |
|--------|---------------|------|-------------|--------------|--------------|--------|
| 34     | 24.066        | VB   | 0.0898      | 316.73645    | 54.52169     | 1.0096 |
| 35     | 24.275        | BV   | 0.0780      | 61.73699     | 12.41080     | 0.1968 |
| 36     | 24.397        | VB   | 0.0912      | 106.41171    | 17.94668     | 0.3392 |
| 37     | 24.781        | BV   | 0.0971      | 45.17023     | 7.41248      | 0.1440 |
| 38     | 24.952        | VV   | 0.0852      | 51.01236     | 9.12754      | 0.1626 |
| 39     | 25.193        | VB   | 0.1575      | 152.65260    | 14.66224     | 0.4866 |

Totals : 3.13727e4 3307.62267

Signal 5: DAD1 E, Sig=240,4 Ref=off

| Peak # | RetTime [min] | Type | Width [min] | Area [mAU*s] | Height [mAU] | Area %  |
|--------|---------------|------|-------------|--------------|--------------|---------|
| 1      | 11.036        | BB   | 0.2282      | 22.70355     | 1.52069      | 0.0810  |
| 2      | 13.690        | BB   | 0.1199      | 9.10374      | 1.20780      | 0.0325  |
| 3      | 14.619        | BB   | 0.0942      | 10.79468     | 1.74490      | 0.0385  |
| 4      | 15.143        | BB   | 0.0903      | 26.74286     | 4.56801      | 0.0954  |
| 5      | 15.483        | BV   | 0.1275      | 18.80848     | 2.34639      | 0.0671  |
| 6      | 15.665        | VB   | 0.0863      | 85.24845     | 15.45822     | 0.3042  |
| 7      | 15.890        | BB   | 0.0890      | 72.26150     | 12.58268     | 0.2578  |
| 8      | 16.435        | BV   | 0.0934      | 7.35842      | 1.23639      | 0.0263  |
| 9      | 16.598        | VV   | 0.1275      | 23.67183     | 2.83132      | 0.0845  |
| 10     | 16.873        | VV   | 0.0905      | 30.06336     | 4.83900      | 0.1073  |
| 11     | 16.971        | VB   | 0.0763      | 16.86926     | 3.26388      | 0.0602  |
| 12     | 17.465        | BB   | 0.0854      | 18.74666     | 3.44851      | 0.0669  |
| 13     | 17.783        | BB   | 0.1021      | 35.21133     | 5.26137      | 0.1256  |
| 14     | 18.398        | VB   | 0.0973      | 39.57500     | 6.29728      | 0.1412  |
| 15     | 18.693        | BV   | 0.0987      | 25.74167     | 4.02147      | 0.0918  |
| 16     | 19.075        | VB   | 0.1222      | 115.23772    | 13.68551     | 0.4112  |
| 17     | 19.801        | BB   | 0.1311      | 8.76465      | 1.05334      | 0.0313  |
| 18     | 20.059        | BV   | 0.1109      | 13.13572     | 1.89430      | 0.0469  |
| 19     | 20.296        | VB   | 0.0952      | 1072.81409   | 175.84843    | 3.8279  |
| 20     | 20.729        | BV   | 0.1573      | 136.37468    | 11.75892     | 0.4866  |
| 21     | 20.934        | VB   | 0.1012      | 115.88248    | 17.98977     | 0.4135  |
| 22     | 21.883        | BB   | 0.0920      | 19.25364     | 3.40578      | 0.0687  |
| 23     | 22.117        | BV   | 0.1262      | 19.28736     | 2.49549      | 0.0688  |
| 24     | 22.417        | VV   | 0.1517      | 2.51929e4    | 2680.38184   | 89.8914 |
| 25     | 22.730        | VB   | 0.0616      | 9.99581      | 2.55773      | 0.0357  |
| 26     | 22.882        | BB   | 0.0885      | 39.25538     | 7.10551      | 0.1401  |
| 27     | 23.104        | BV   | 0.0895      | 17.64683     | 3.14221      | 0.0630  |
| 28     | 23.375        | VB   | 0.1067      | 196.51772    | 28.41080     | 0.7012  |
| 29     | 23.934        | BV   | 0.1043      | 136.12515    | 18.39413     | 0.4857  |
| 30     | 24.066        | VB   | 0.0899      | 219.46948    | 37.71962     | 0.7831  |
| 31     | 24.275        | BV   | 0.0790      | 49.67536     | 9.82261      | 0.1772  |
| 32     | 24.396        | VB   | 0.0907      | 72.79107     | 12.36407     | 0.2597  |
| 33     | 24.785        | BB   | 0.0884      | 17.38600     | 3.25111      | 0.0620  |
| 34     | 24.952        | BV   | 0.0782      | 30.21395     | 5.85291      | 0.1078  |
| 35     | 25.190        | VB   | 0.1578      | 100.28733    | 9.60244      | 0.3578  |

Totals : 2.80259e4 3117.36442

Data File C:\Chem32\1\Data\NHC\KGP485\_Concentrated.D  
 Sample Name: KGP485\_Concentrated

Signal 6: DAD1 F, Sig=280,16 Ref=off

| Peak # | RetTime [min] | Type | Width [min] | Area [mAU*s] | Height [mAU] | Area %  |
|--------|---------------|------|-------------|--------------|--------------|---------|
| 1      | 15.473        | BV   | 0.1265      | 11.01561     | 1.41958      | 0.0632  |
| 2      | 15.665        | VB   | 0.0851      | 13.77363     | 2.54522      | 0.0791  |
| 3      | 15.890        | BB   | 0.0946      | 18.42481     | 2.96128      | 0.1058  |
| 4      | 16.423        | BV   | 0.0821      | 6.27473      | 1.21838      | 0.0360  |
| 5      | 16.607        | VB   | 0.1146      | 26.63526     | 3.76305      | 0.1529  |
| 6      | 16.874        | BV   | 0.0779      | 25.99045     | 5.06250      | 0.1492  |
| 7      | 16.974        | VB   | 0.0824      | 21.19812     | 3.83990      | 0.1217  |
| 8      | 17.460        | BB   | 0.0882      | 11.98845     | 2.11153      | 0.0688  |
| 9      | 17.784        | BB   | 0.1032      | 9.76219      | 1.43794      | 0.0561  |
| 10     | 18.396        | VB   | 0.1104      | 11.03026     | 1.48952      | 0.0633  |
| 11     | 18.715        | BV   | 0.1082      | 7.61201      | 1.08086      | 0.0437  |
| 12     | 19.078        | VB   | 0.1172      | 87.54132     | 10.73143     | 0.5026  |
| 13     | 20.296        | BB   | 0.0961      | 179.89883    | 29.11555     | 1.0329  |
| 14     | 20.584        | BV   | 0.0955      | 14.32021     | 2.27442      | 0.0822  |
| 15     | 20.728        | VV   | 0.1070      | 23.98289     | 3.37284      | 0.1377  |
| 16     | 20.933        | VB   | 0.0983      | 124.59994    | 19.55870     | 0.7154  |
| 17     | 22.121        | BV   | 0.1405      | 10.69543     | 1.09004      | 0.0614  |
| 18     | 22.416        | VV   | 0.1184      | 1.64326e4    | 2218.00977   | 94.3514 |
| 19     | 22.884        | VV   | 0.1074      | 29.37505     | 4.20932      | 0.1687  |
| 20     | 23.376        | BB   | 0.1085      | 116.49738    | 16.48240     | 0.6689  |
| 21     | 23.936        | BV   | 0.0995      | 48.21041     | 6.90030      | 0.2768  |
| 22     | 24.066        | VB   | 0.0897      | 114.10828    | 19.66980     | 0.6552  |
| 23     | 24.276        | BV   | 0.0737      | 17.08398     | 3.57947      | 0.0981  |
| 24     | 24.397        | VB   | 0.0916      | 40.58337     | 6.80235      | 0.2330  |
| 25     | 24.781        | BB   | 0.0938      | 13.17234     | 2.26540      | 0.0756  |

Totals : 1.74163e4 2370.99155

Signal 7: DAD1 G, Sig=300,16 Ref=off

| Peak # | RetTime [min] | Type | Width [min] | Area [mAU*s] | Height [mAU] | Area %  |
|--------|---------------|------|-------------|--------------|--------------|---------|
| 1      | 16.420        | BV   | 0.0851      | 8.01321      | 1.48085      | 0.1082  |
| 2      | 16.619        | VV   | 0.1049      | 25.07796     | 3.61711      | 0.3387  |
| 3      | 16.874        | VV   | 0.0792      | 30.45059     | 5.80377      | 0.4113  |
| 4      | 16.973        | VB   | 0.0824      | 23.86242     | 4.32461      | 0.3223  |
| 5      | 19.079        | BB   | 0.1116      | 92.54210     | 12.05236     | 1.2500  |
| 6      | 20.296        | BB   | 0.0976      | 37.01918     | 5.87041      | 0.5000  |
| 7      | 20.727        | VV   | 0.1007      | 13.54648     | 1.95953      | 0.1830  |
| 8      | 20.934        | VB   | 0.1087      | 23.00213     | 3.16829      | 0.3107  |
| 9      | 22.034        | BV   | 0.1484      | 10.83307     | 1.00026      | 0.1463  |
| 10     | 22.415        | VV   | 0.1040      | 6989.56543   | 1046.03650   | 94.4082 |
| 11     | 22.748        | VV   | 0.0838      | 6.04228      | 1.07059      | 0.0816  |
| 12     | 22.886        | VB   | 0.1253      | 16.57144     | 1.94612      | 0.2238  |
| 13     | 23.377        | BB   | 0.1097      | 37.73441     | 5.13532      | 0.5097  |
| 14     | 23.937        | BV   | 0.0976      | 22.62986     | 3.31826      | 0.3057  |
| 15     | 24.065        | VB   | 0.0896      | 43.96283     | 7.58438      | 0.5938  |
| 16     | 24.276        | BV   | 0.0786      | 9.02400      | 1.79778      | 0.1219  |



Data File C:\Chem32\1\Data\NHC\KGP485\_Concentrated.D  
Sample Name: KGP485\_Concentrated

| Peak # | RetTime [min] | Type | Width [min] | Area [mAU*s] | Height [mAU] | Area % |
|--------|---------------|------|-------------|--------------|--------------|--------|
| 17     | 24.396        | VB   | 0.0897      | 13.67874     | 2.35766      | 0.1848 |

Totals : 7403.55613 1108.52379

Signal 8: DAD1 H, Sig=320,16 Ref=off

| Peak # | RetTime [min] | Type | Width [min] | Area [mAU*s] | Height [mAU] | Area %  |
|--------|---------------|------|-------------|--------------|--------------|---------|
| 1      | 16.623        | VV   | 0.0985      | 12.29826     | 1.87665      | 2.0106  |
| 2      | 16.874        | VV   | 0.0792      | 17.02584     | 3.24417      | 2.7835  |
| 3      | 16.973        | VB   | 0.0842      | 13.60806     | 2.39984      | 2.2247  |
| 4      | 19.079        | BB   | 0.1051      | 60.78568     | 8.53374      | 9.9377  |
| 5      | 22.415        | BB   | 0.1032      | 507.95117    | 74.83036     | 83.0435 |

Totals : 611.66900 90.88476

=====  
\*\*\* End of Report \*\*\*

28. (3-methoxy-9-(3,4,5-trimethoxyphenyl)-6,7-dihydro-5H-benzo[7]annulen-4-yl)methanol

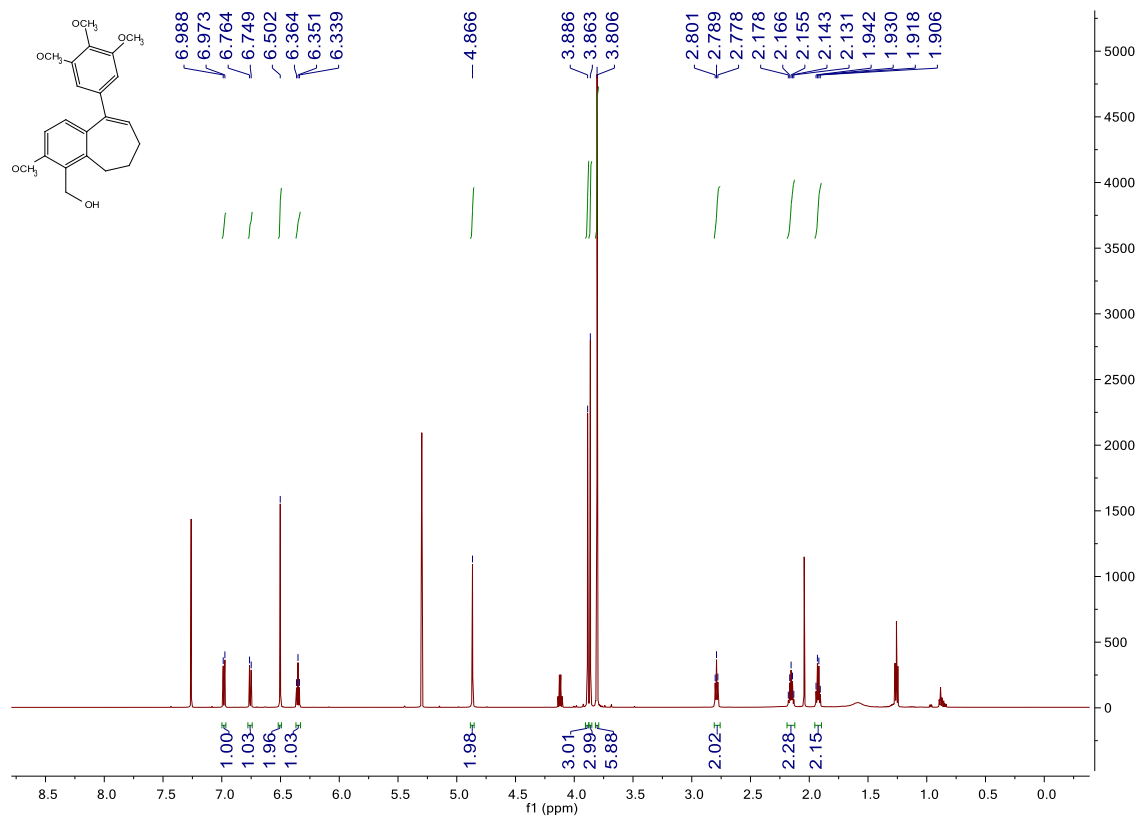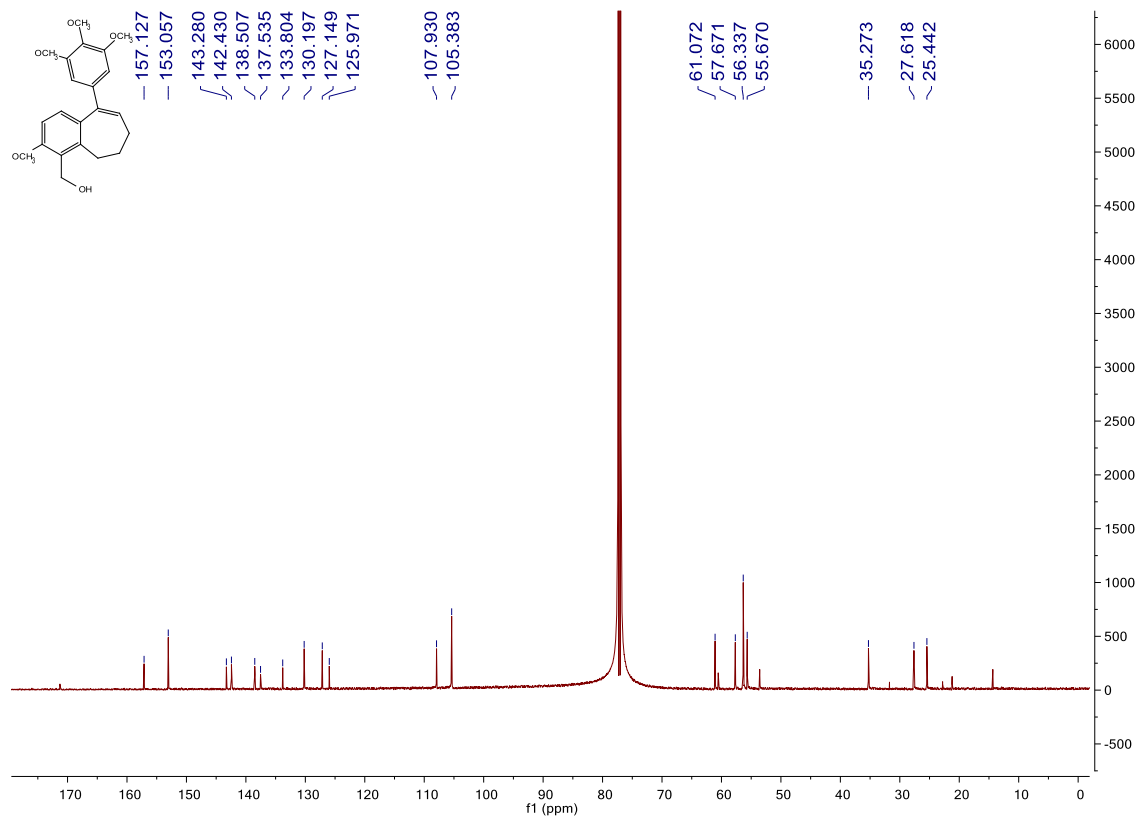

NHC\_3\_15\_CH2OH\_+ESI#119 RT: 1.00 AV: 1 NL: 4.81E6  
T: FTMS + p ESI Full ms [200.00-800.00]

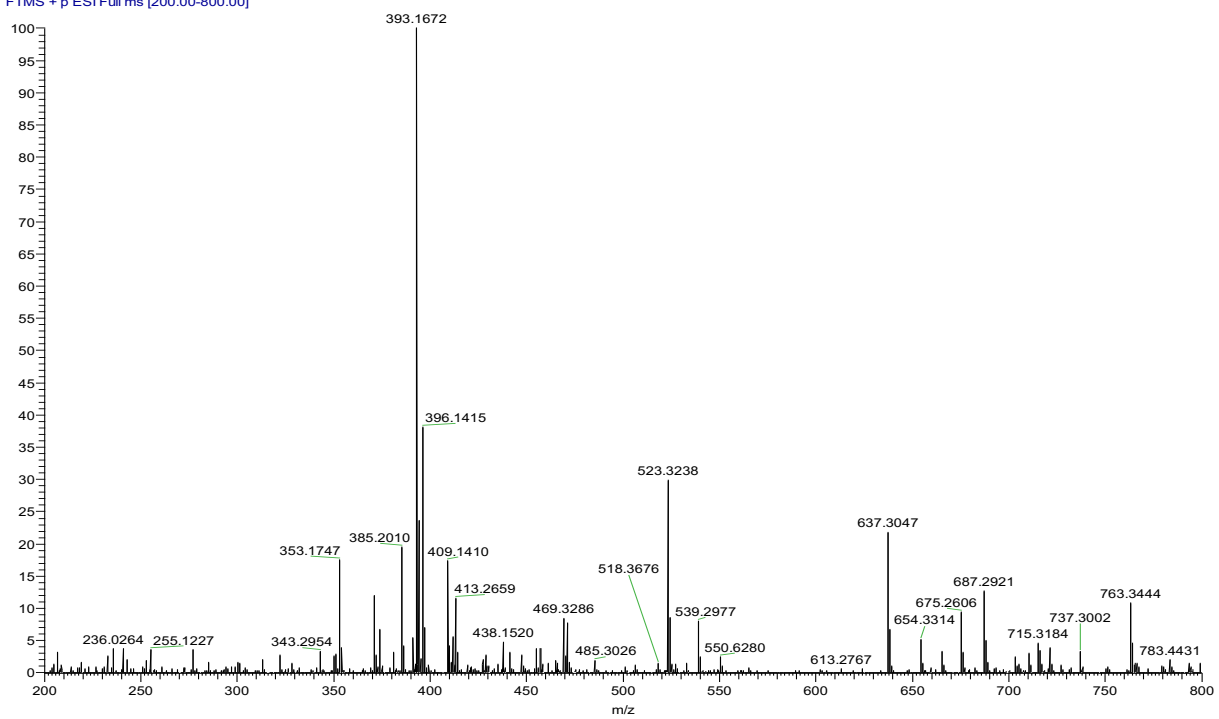



Data File C:\Chem32\1\Data\NHC\KGP479-Remake-20160628.D  
Sample Name: KGP483-Remake-20160628

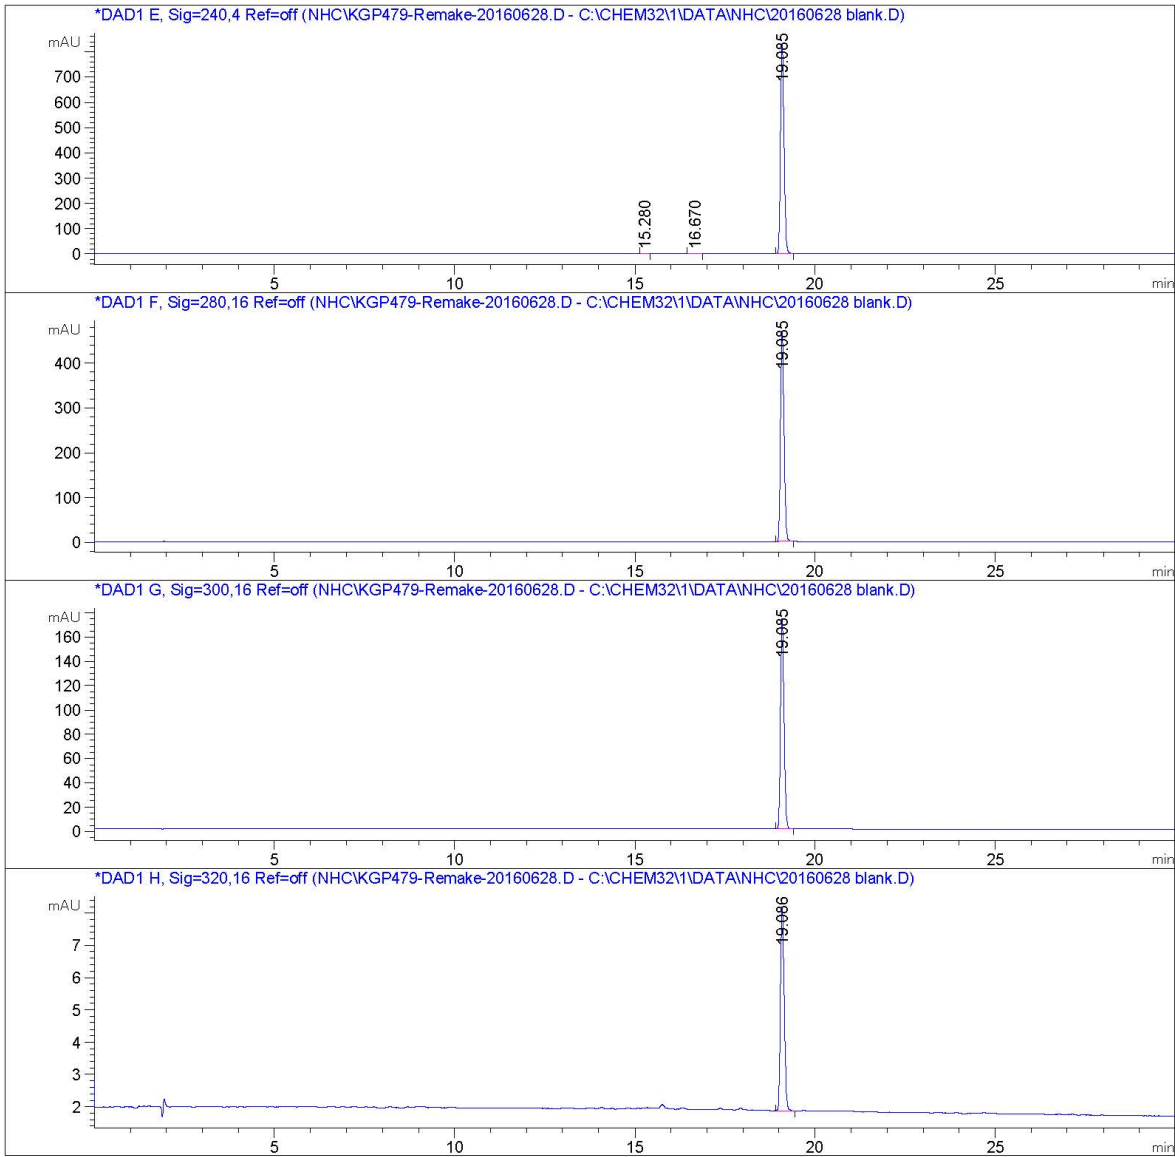

=====  
Area Percent Report  
=====

Sorted By : Signal  
Multiplier : 1.0000  
Dilution : 1.0000  
Do not use Multiplier & Dilution Factor with ISTDs

Data File C:\Chem32\1\Data\NHC\KGP479-Remake-20160628.D  
Sample Name: KGP483-Remake-20160628

Signal 1: DAD1 A, Sig=254,4 Ref=off  
Signal has been modified after loading from rawdata file!

| Peak #   | RetTime [min] | Type | Width [min] | Area [mAU*s] | Height [mAU] | Area %   |
|----------|---------------|------|-------------|--------------|--------------|----------|
| 1        | 19.085        | BB   | 0.1008      | 5794.88574   | 880.20862    | 100.0000 |
| Totals : |               |      |             | 5794.88574   | 880.20862    |          |

Signal 2: DAD1 B, Sig=254,16 Ref=off  
Signal has been modified after loading from rawdata file!

| Peak #   | RetTime [min] | Type | Width [min] | Area [mAU*s] | Height [mAU] | Area %   |
|----------|---------------|------|-------------|--------------|--------------|----------|
| 1        | 19.085        | BB   | 0.1008      | 5458.21191   | 829.09521    | 100.0000 |
| Totals : |               |      |             | 5458.21191   | 829.09521    |          |

Signal 3: DAD1 C, Sig=210,8 Ref=off  
Signal has been modified after loading from rawdata file!

| Peak #   | RetTime [min] | Type | Width [min] | Area [mAU*s] | Height [mAU] | Area %  |
|----------|---------------|------|-------------|--------------|--------------|---------|
| 1        | 1.241         | BB   | 0.0576      | 15.66318     | 4.19107      | 0.1304  |
| 2        | 1.944         | BB   | 0.0763      | 6.04444      | 1.13141      | 0.0503  |
| 3        | 10.899        | BB   | 0.0800      | 19.40668     | 3.77627      | 0.1616  |
| 4        | 12.468        | BB   | 0.0904      | 10.92510     | 1.86384      | 0.0910  |
| 5        | 14.106        | BB   | 0.0904      | 12.37679     | 2.11183      | 0.1030  |
| 6        | 14.720        | BB   | 0.1209      | 8.41541      | 1.01281      | 0.0701  |
| 7        | 15.280        | BV   | 0.0971      | 28.64273     | 4.56986      | 0.2385  |
| 8        | 16.670        | BB   | 0.0997      | 36.99091     | 5.70152      | 0.3080  |
| 9        | 18.549        | BV   | 0.1031      | 7.54006      | 1.05901      | 0.0628  |
| 10       | 19.085        | BB   | 0.1015      | 1.18652e4    | 1786.20667   | 98.7844 |
| Totals : |               |      |             | 1.20112e4    | 1811.62430   |         |

Signal 4: DAD1 D, Sig=230,16 Ref=off  
Signal has been modified after loading from rawdata file!

| Peak # | RetTime [min] | Type | Width [min] | Area [mAU*s] | Height [mAU] | Area %  |
|--------|---------------|------|-------------|--------------|--------------|---------|
| 1      | 1.943         | BB   | 0.0761      | 5.69901      | 1.07124      | 0.0677  |
| 2      | 15.279        | BB   | 0.0997      | 10.85100     | 1.67169      | 0.1289  |
| 3      | 16.670        | BB   | 0.1036      | 12.63866     | 1.85169      | 0.1502  |
| 4      | 19.085        | BB   | 0.1011      | 8386.12500   | 1269.11670   | 99.6531 |

Data File C:\Chem32\1\Data\NHC\KGP479-Remake-20160628.D  
Sample Name: KGP483-Remake-20160628

Totals : 8415.31368 1273.71131

Signal 5: DAD1 E, Sig=240,4 Ref=off  
Signal has been modified after loading from rawdata file!

| Peak # | RetTime [min] | Type | Width [min] | Area [mAU*s] | Height [mAU] | Area %  |
|--------|---------------|------|-------------|--------------|--------------|---------|
| 1      | 15.280        | BB   | 0.0923      | 5.85575      | 1.00086      | 0.1064  |
| 2      | 16.670        | BB   | 0.1017      | 9.01613      | 1.35412      | 0.1638  |
| 3      | 19.085        | BB   | 0.1008      | 5489.83496   | 833.59961    | 99.7298 |

Totals : 5504.70684 835.95460

Signal 6: DAD1 F, Sig=280,16 Ref=off  
Signal has been modified after loading from rawdata file!

| Peak # | RetTime [min] | Type | Width [min] | Area [mAU*s] | Height [mAU] | Area %   |
|--------|---------------|------|-------------|--------------|--------------|----------|
| 1      | 19.085        | BB   | 0.1008      | 3100.32178   | 470.76486    | 100.0000 |

Totals : 3100.32178 470.76486

Signal 7: DAD1 G, Sig=300,16 Ref=off  
Signal has been modified after loading from rawdata file!

| Peak # | RetTime [min] | Type | Width [min] | Area [mAU*s] | Height [mAU] | Area %   |
|--------|---------------|------|-------------|--------------|--------------|----------|
| 1      | 19.085        | BB   | 0.1011      | 1146.14038   | 173.54346    | 100.0000 |

Totals : 1146.14038 173.54346

Signal 8: DAD1 H, Sig=320,16 Ref=off  
Signal has been modified after loading from rawdata file!

| Peak # | RetTime [min] | Type | Width [min] | Area [mAU*s] | Height [mAU] | Area %   |
|--------|---------------|------|-------------|--------------|--------------|----------|
| 1      | 19.086        | BB   | 0.1110      | 45.00113     | 6.32842      | 100.0000 |

Totals : 45.00113 6.32842

=====  
\*\*\* End of Report \*\*\*

### 30. 3-(2,3-Dimethoxyphenyl)propanoic acid

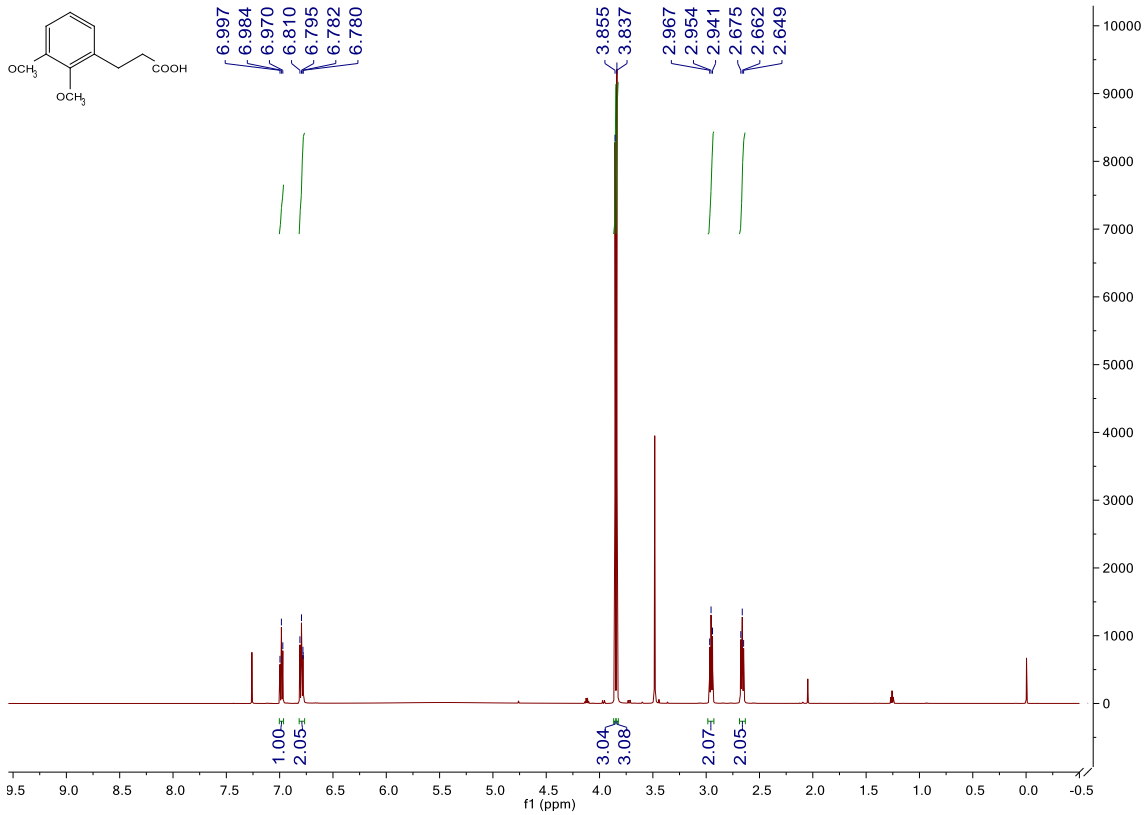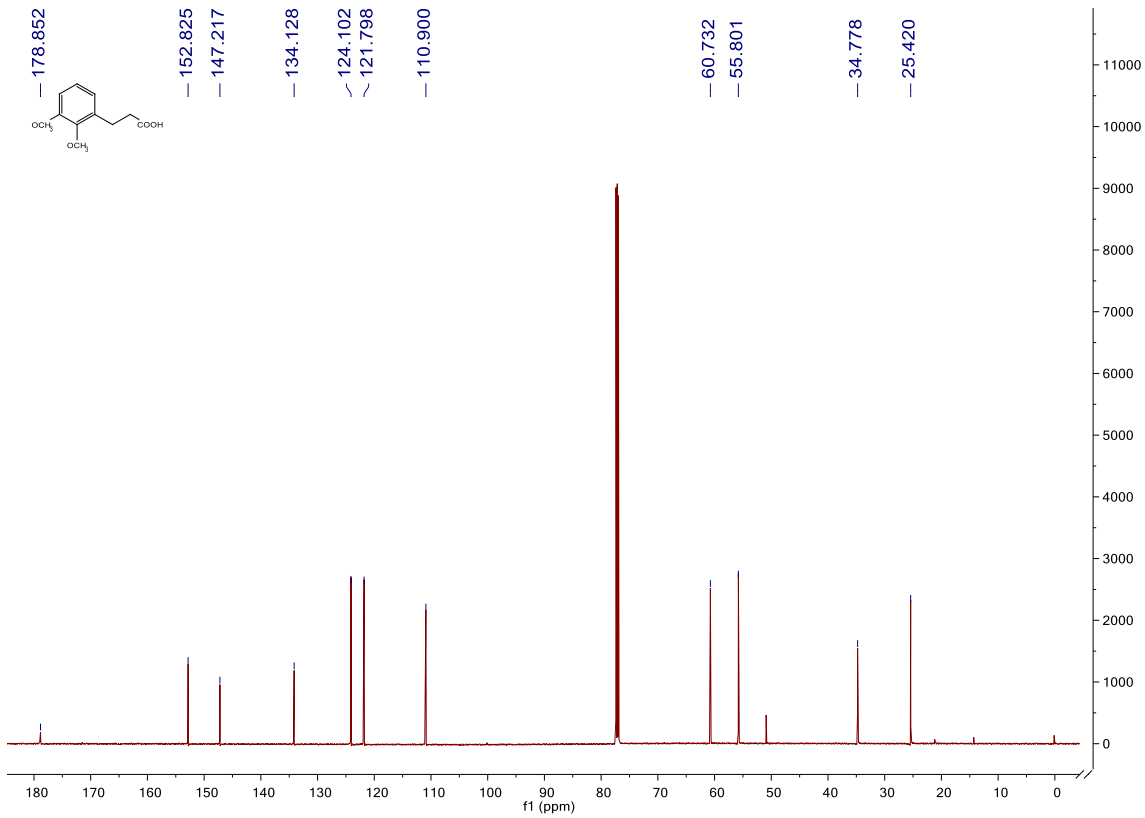



### 31. Methyl 5-(2,3-dimethoxyphenyl)-3-oxopentanoate

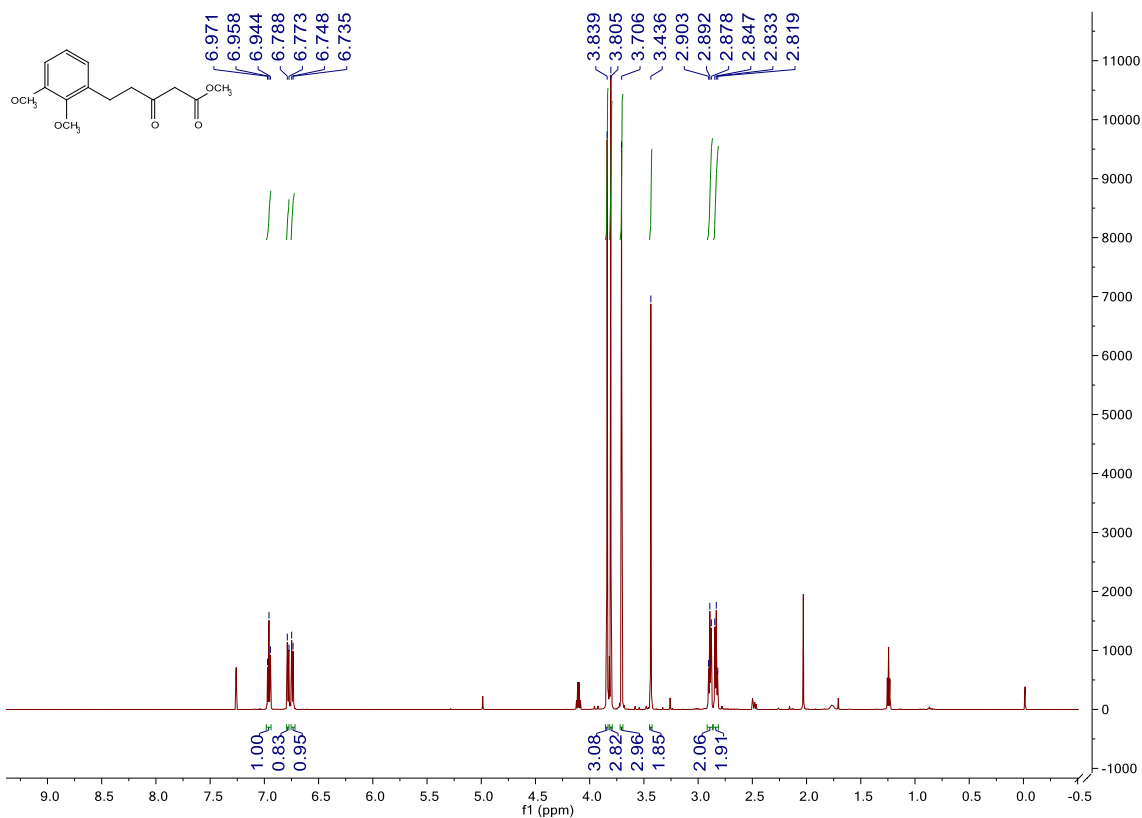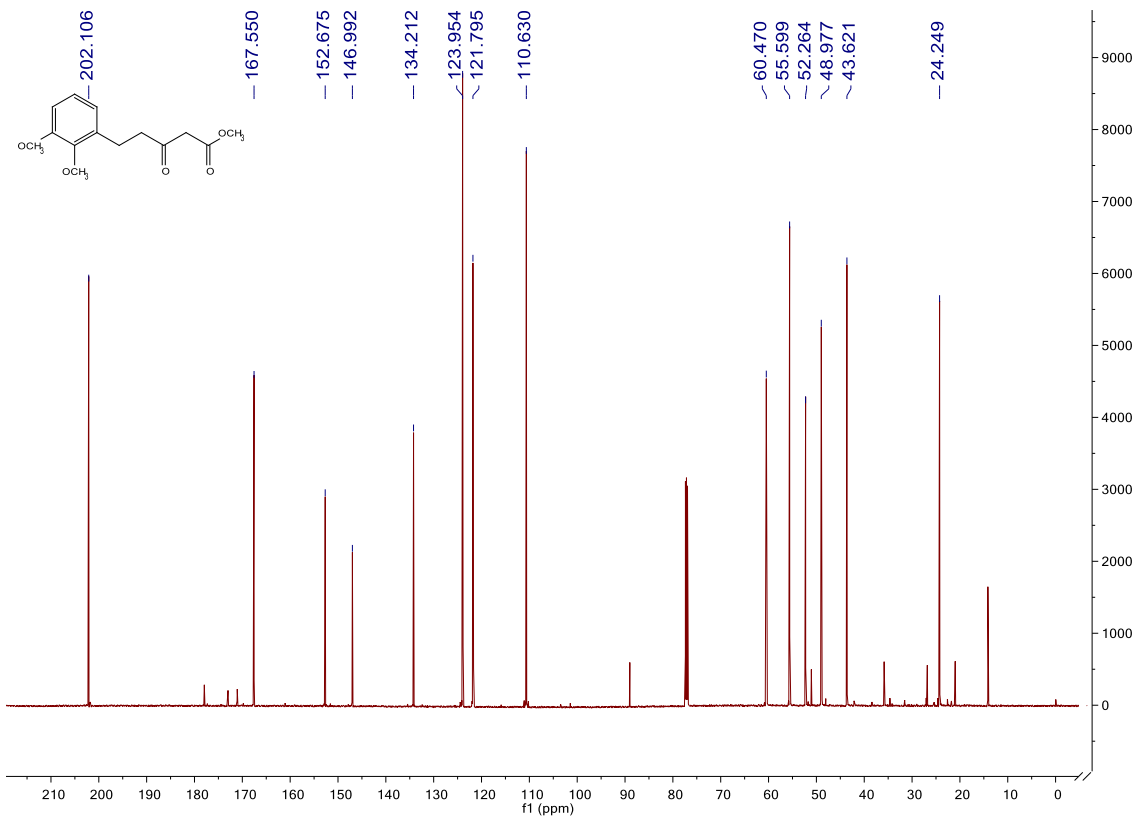

### 32. Methyl 5-(2,3-dimethoxyphenyl)-3-hydroxypentanoate

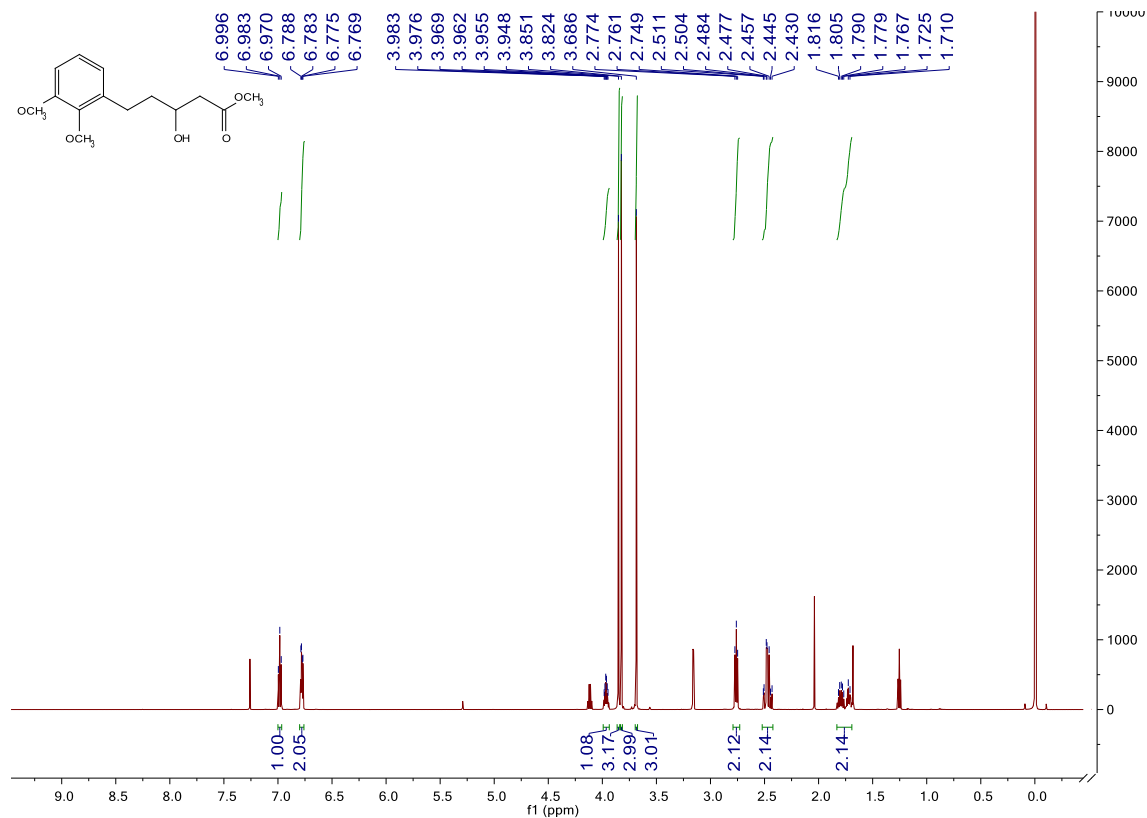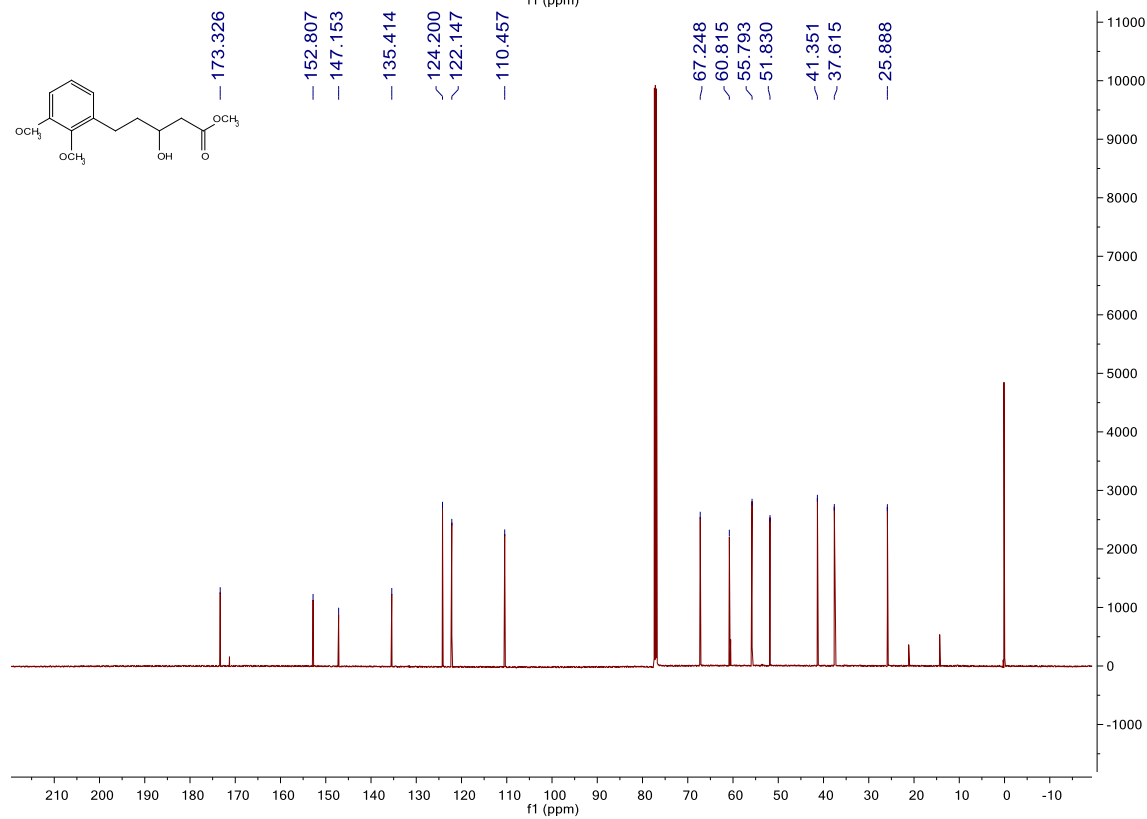

### 33. Methyl 3-((tert-butyldiphenylsilyl)oxy)-5-(2,3-dimethoxyphenyl)pentanoate

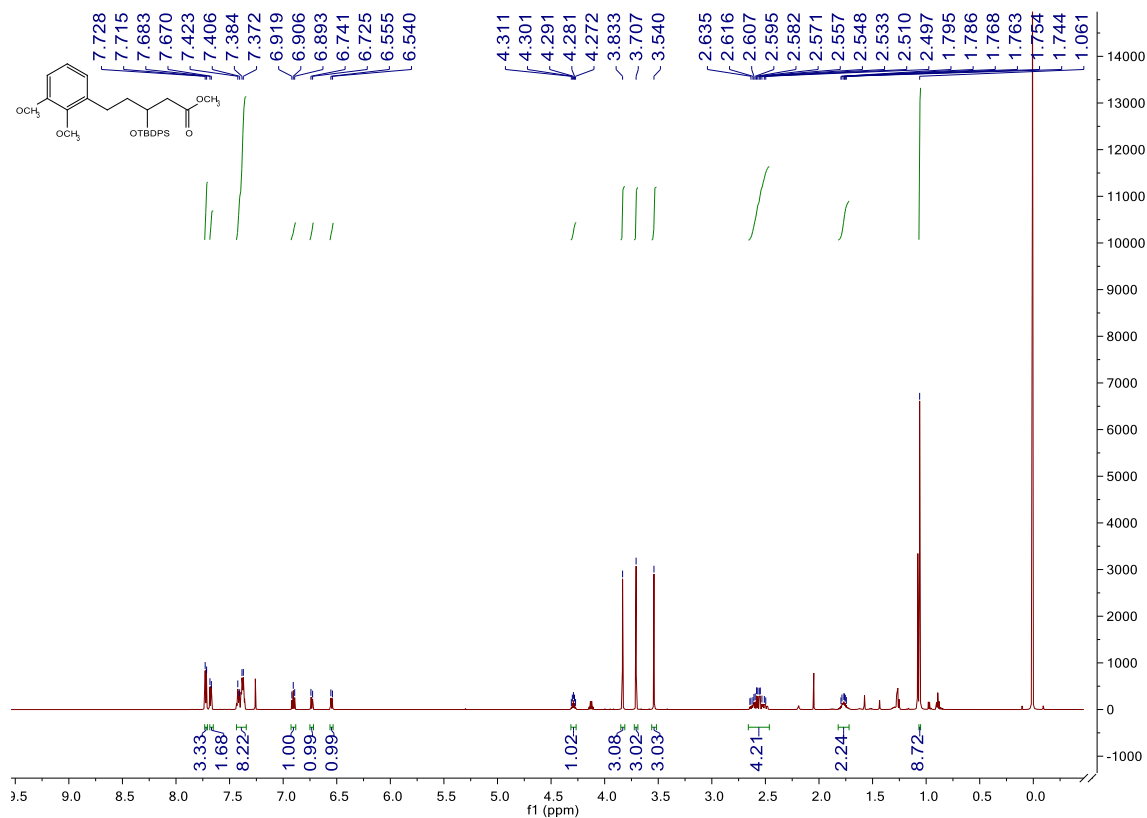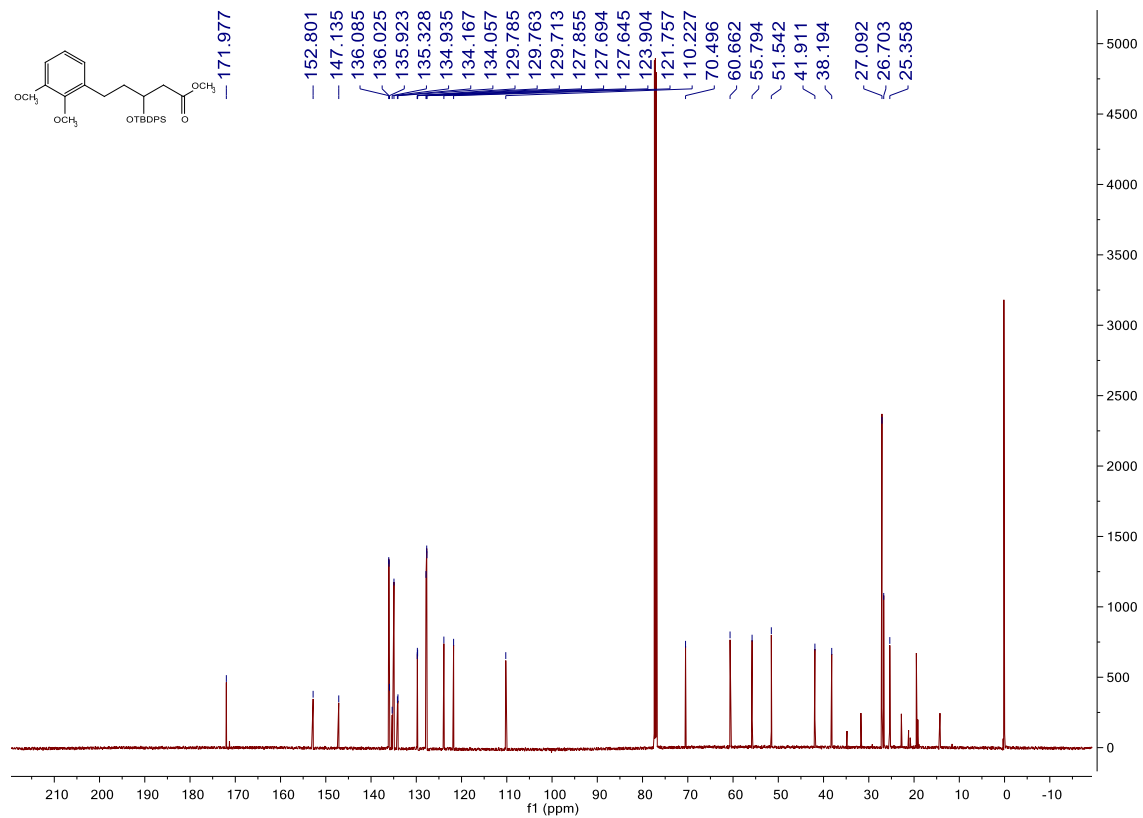

34. 3-((tert-butyldiphenylsilyl)oxy)-5-(2,3-dimethoxyphenyl)pentanoic acid

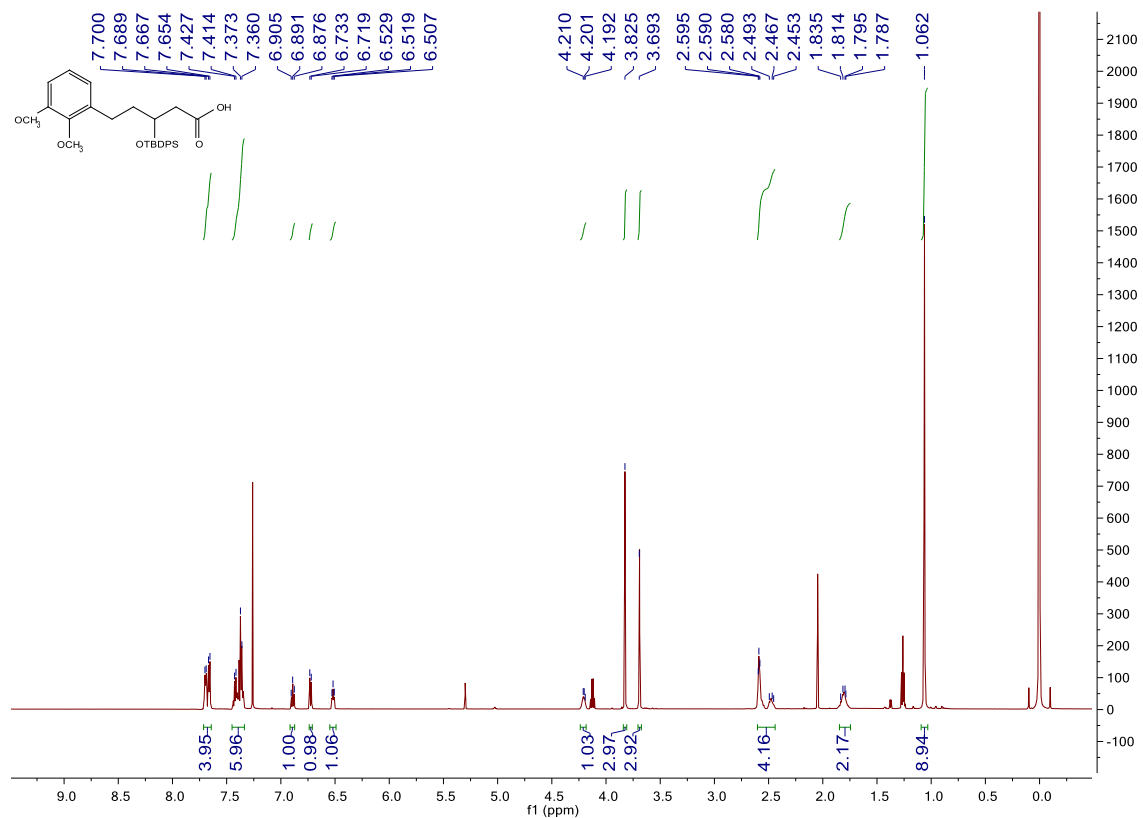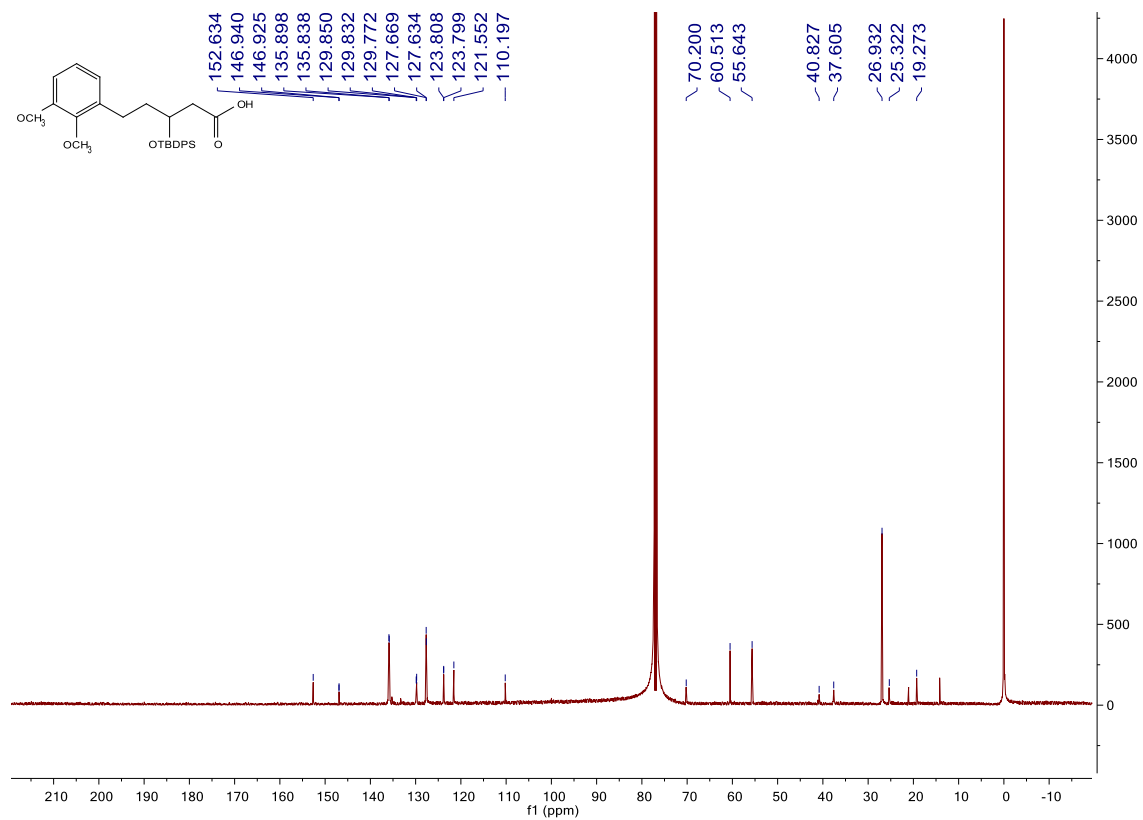

35. 7-((tert-butyldiphenylsilyloxy)-1,2-dimethoxy-6,7,8,9-tetrahydro-5H-benzo[7]annulen-5-one

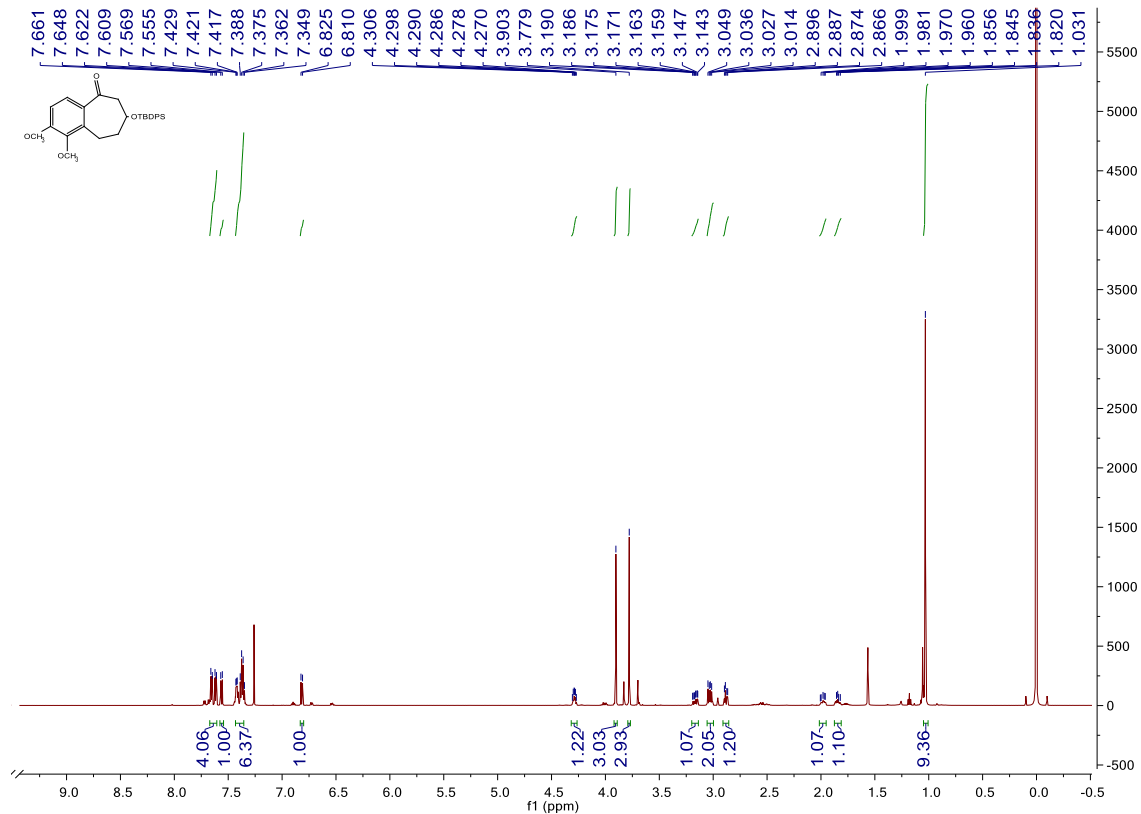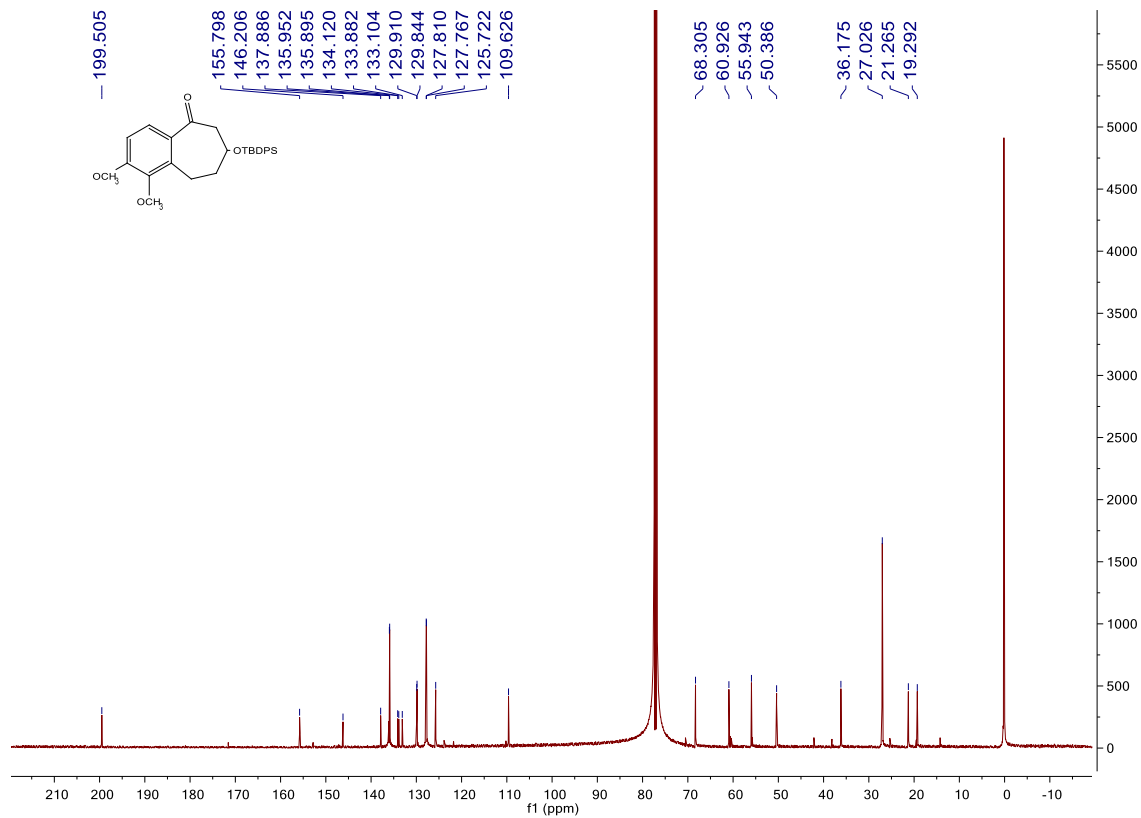

36. 7-hydroxy-1,2-dimethoxy-6,7,8,9-tetrahydro-5H-benzo[7]annulen-5-one

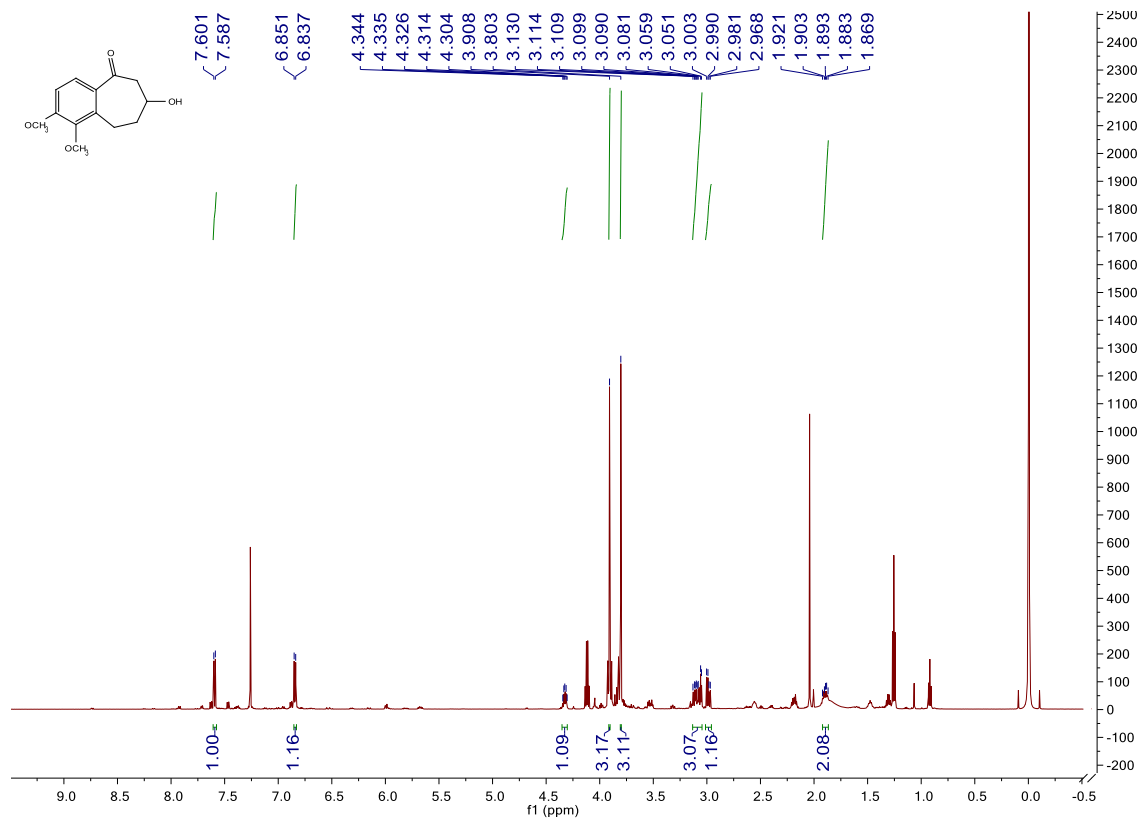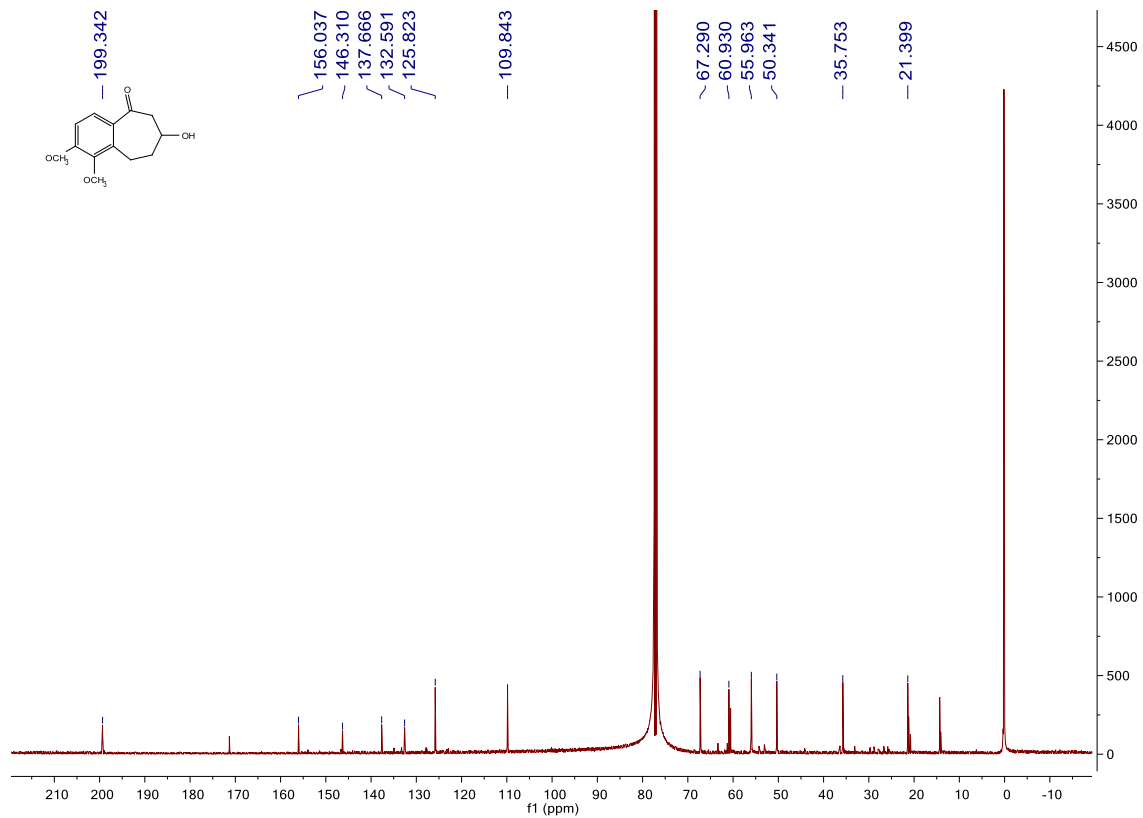

37. 3,4-dimethoxy-9-(3,4,5-trimethoxyphenyl)-6,7-dihydro-5H-benzo[7]annulen-7-ol

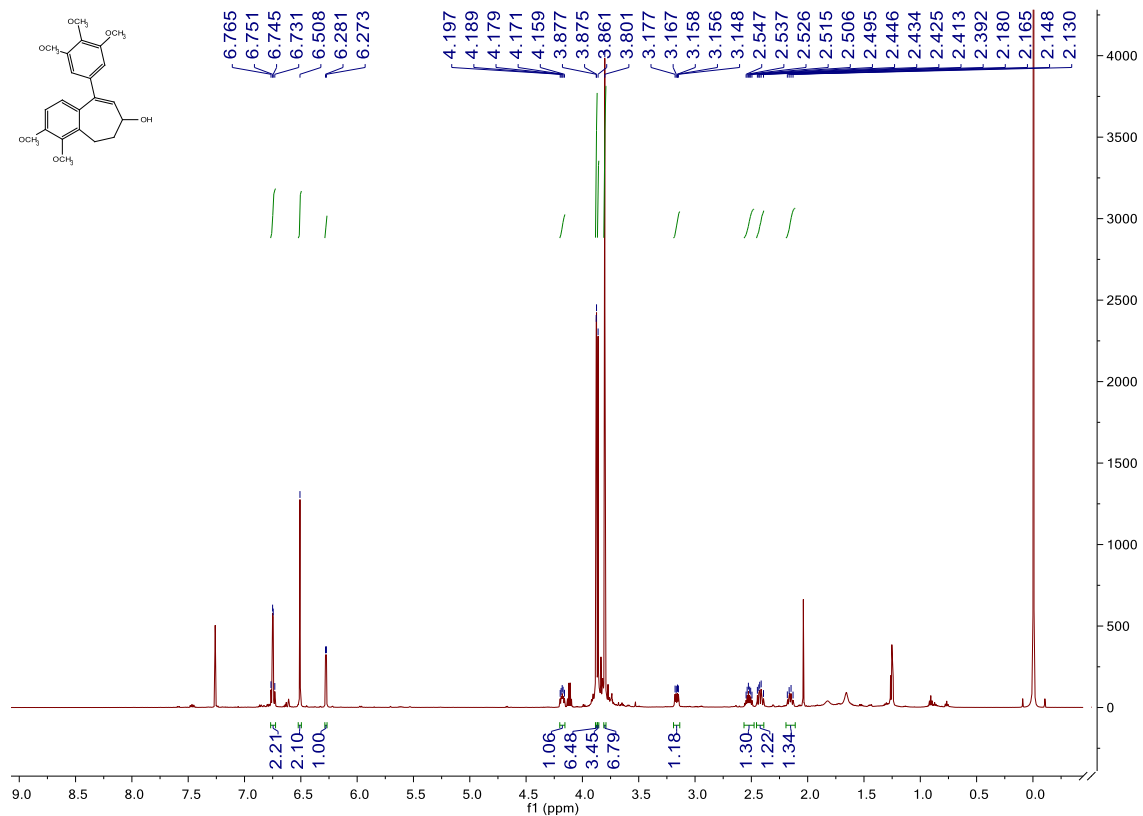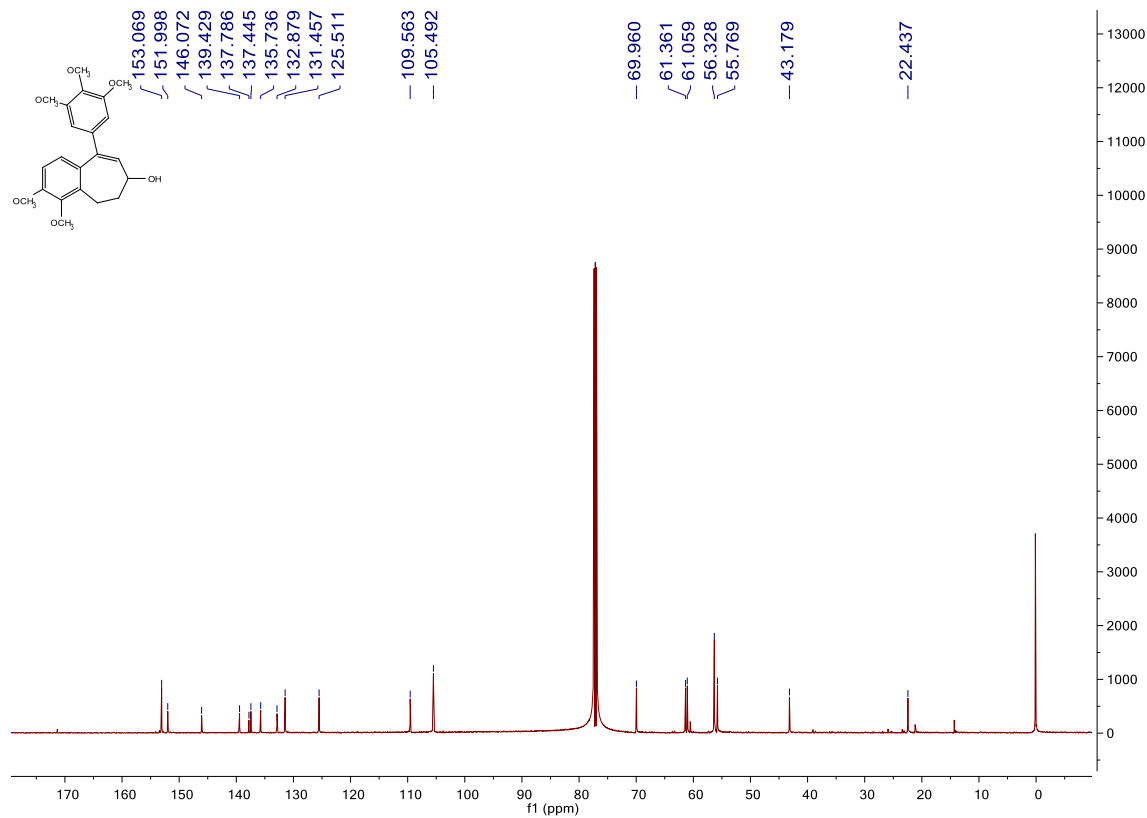

NHC\_3\_05\_KGP471 #200 RT: 1.69 AV: 1 NL: 8.53E6  
T: FTMS + p ESI Full ms [200.00-900.00]

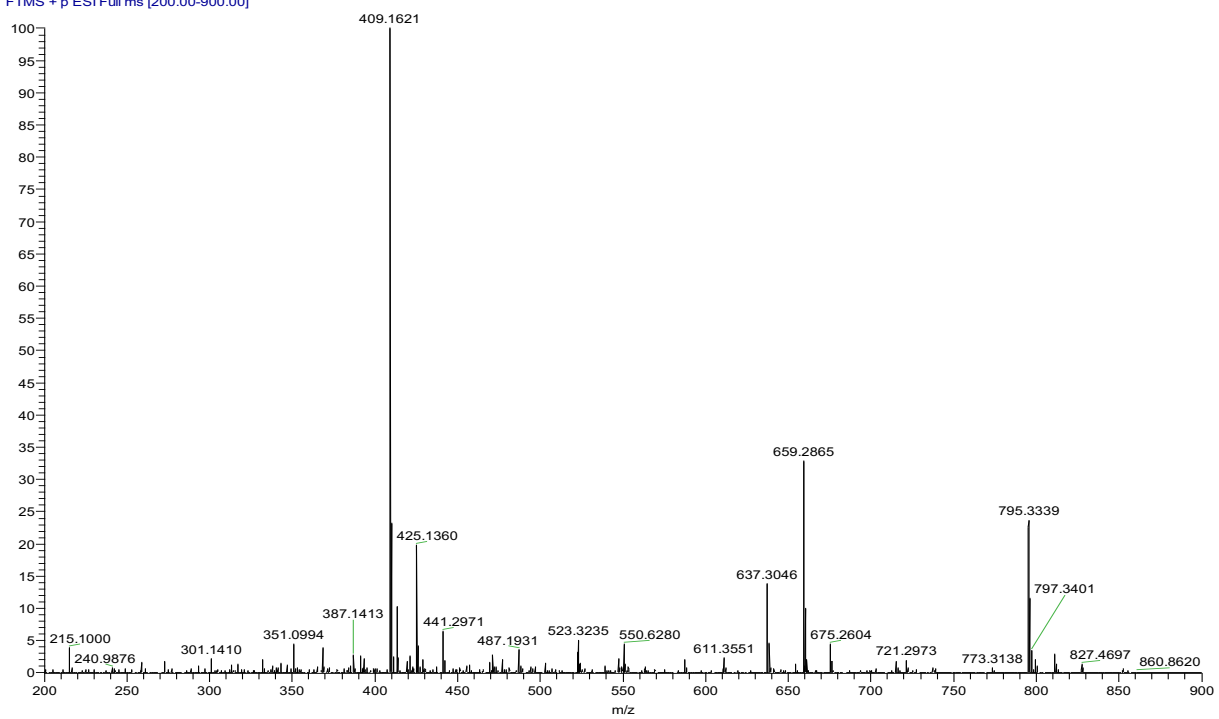



Data File C:\Chem32\1\Data\NHC\KGP471\_Concentrated.D  
Sample Name: KGP471\_Concentrated

=====

Acq. Operator : SYSTEM  
Sample Operator : SYSTEM  
Acq. Instrument : 1200 HPLC Location : 1  
Injection Date : 2/28/2018 3:57:48 PM  
Inj Volume : No inj

Acq. Method : C:\CHEM32\1\METHODS\MASTERMETHOD2.M  
Last changed : 12/2/2015 12:37:42 PM by Eric Lin  
Analysis Method : C:\CHEM32\1\METHODS\RT-ACNWASH 2.M  
Last changed : 7/9/2015 2:27:22 PM by Blake  
Method Info : General Column Wash Method

Sample Info : 20180228

Additional Info : Peak(s) manually integrated

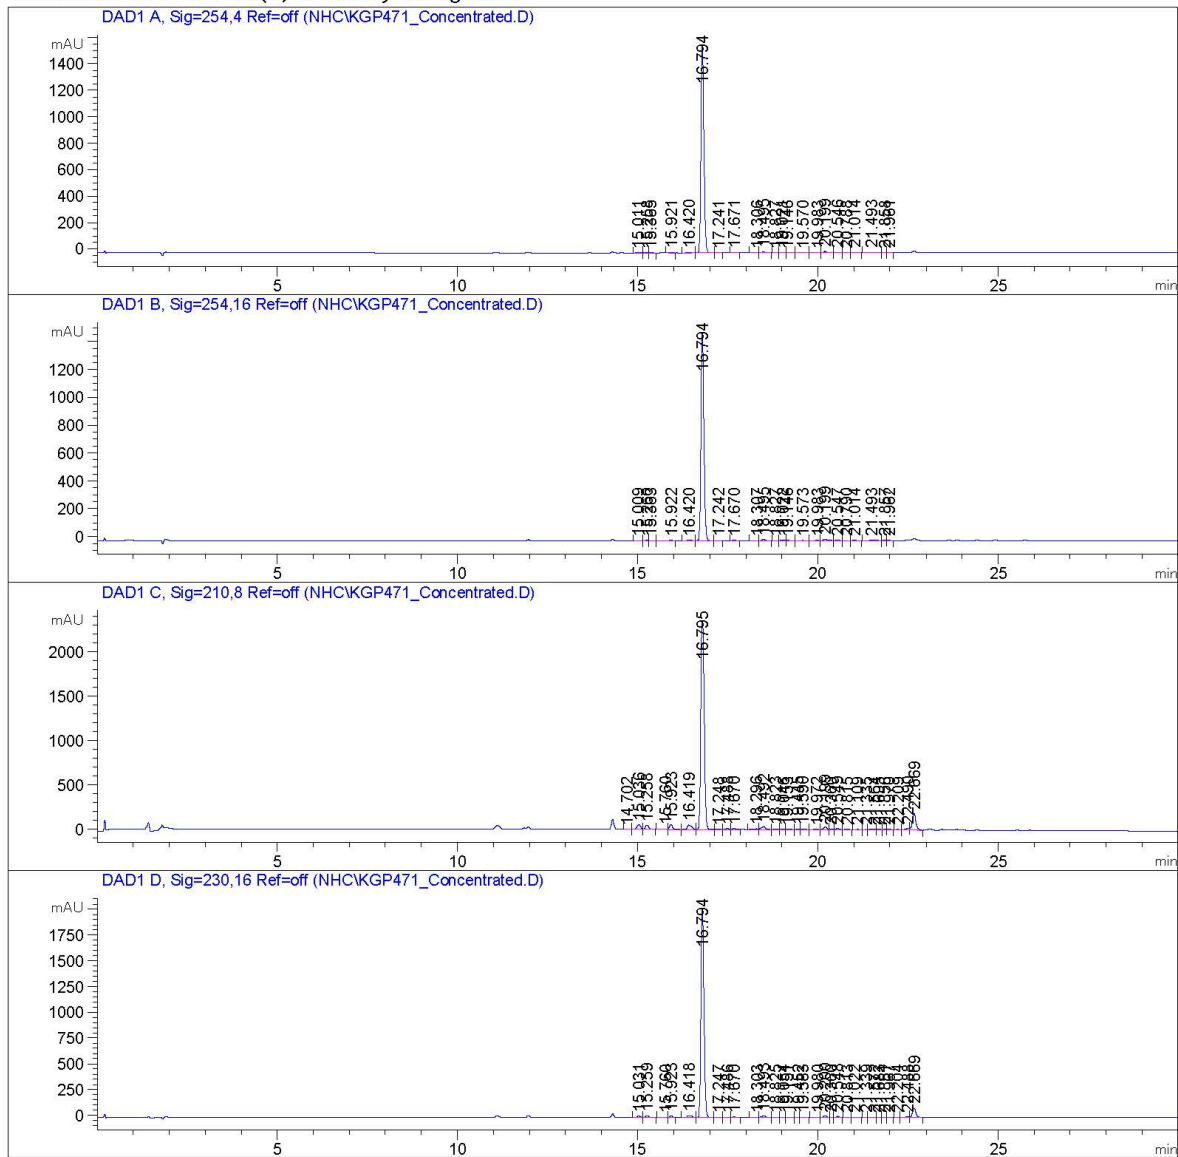

Data File C:\Chem32\1\Data\NHC\KGP471\_Concentrated.D  
Sample Name: KGP471\_Concentrated

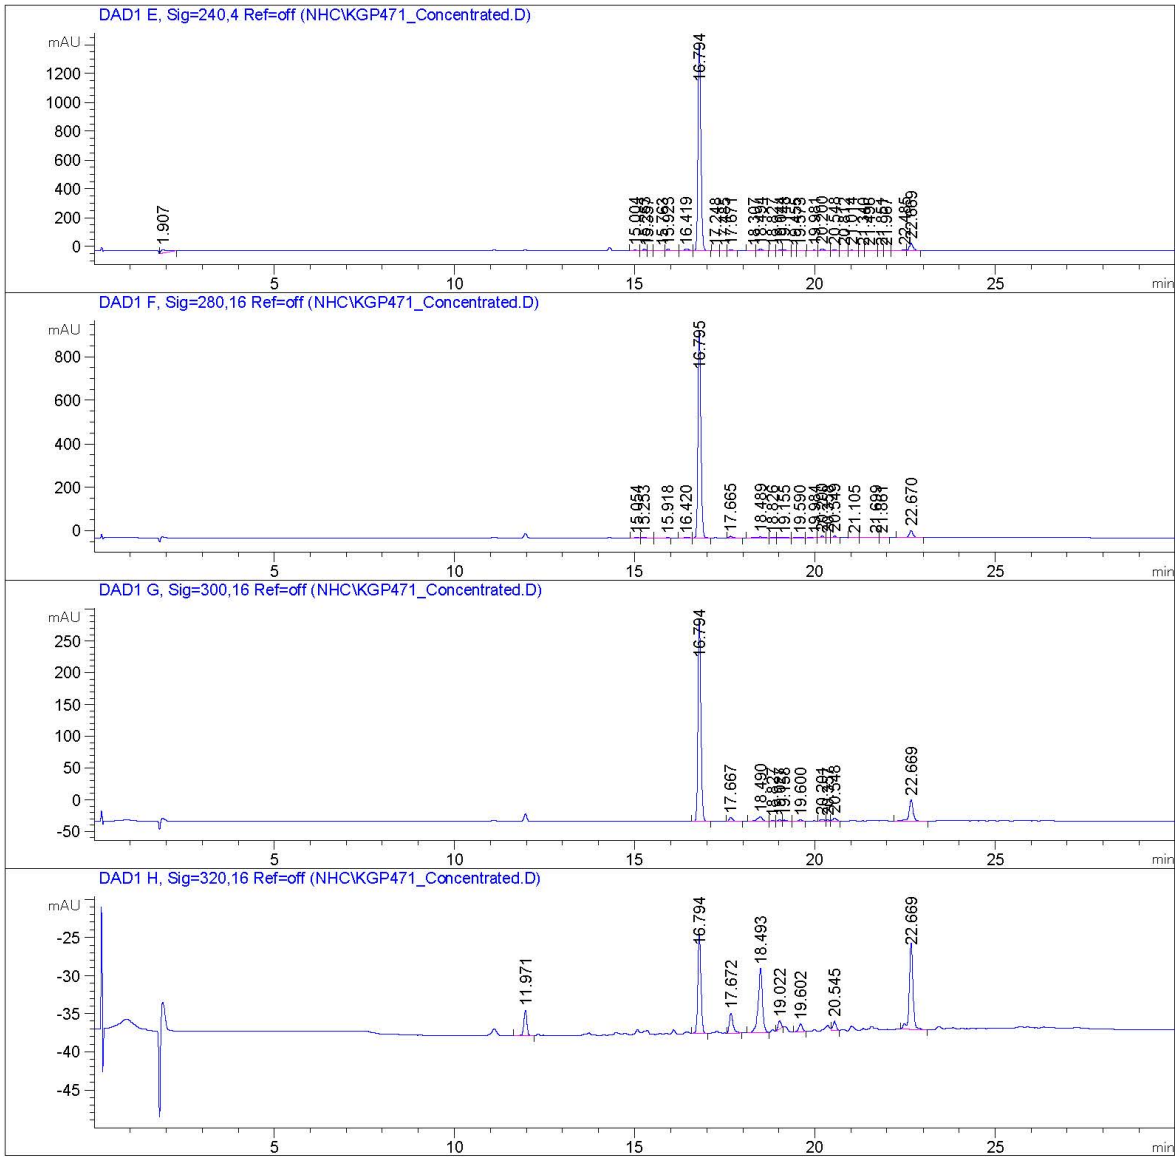

=====  
Area Percent Report  
=====

Sorted By : Signal  
Multiplier : 1.0000  
Dilution : 1.0000  
Use Multiplier & Dilution Factor with ISTDs

Data File C:\Chem32\1\Data\NHC\KGP471\_Concentrated.D  
 Sample Name: KGP471\_Concentrated

Signal 1: DAD1 A, Sig=254,4 Ref=off

| Peak # | RetTime [min] | Type | Width [min] | Area [mAU*s] | Height [mAU] | Area %  |
|--------|---------------|------|-------------|--------------|--------------|---------|
| 1      | 15.011        | BV   | 0.1228      | 16.78301     | 2.15665      | 0.1759  |
| 2      | 15.258        | VV   | 0.0939      | 19.06440     | 3.01132      | 0.1999  |
| 3      | 15.365        | VB   | 0.0889      | 18.88440     | 3.19873      | 0.1980  |
| 4      | 15.921        | BB   | 0.0820      | 19.30542     | 3.63033      | 0.2024  |
| 5      | 16.420        | BV   | 0.1259      | 35.84679     | 3.87537      | 0.3758  |
| 6      | 16.794        | VV   | 0.0892      | 9045.49707   | 1571.56372   | 94.8299 |
| 7      | 17.241        | VB   | 0.1066      | 9.07631      | 1.31312      | 0.0952  |
| 8      | 17.671        | BB   | 0.0944      | 23.82453     | 3.94665      | 0.2498  |
| 9      | 18.306        | BV   | 0.1229      | 8.85831      | 1.11226      | 0.0929  |
| 10     | 18.495        | VB   | 0.1106      | 57.96413     | 7.80660      | 0.6077  |
| 11     | 18.827        | BB   | 0.0851      | 8.71520      | 1.61229      | 0.0914  |
| 12     | 19.021        | BV   | 0.1045      | 31.15117     | 4.63042      | 0.3266  |
| 13     | 19.146        | VB   | 0.0895      | 13.83794     | 2.32390      | 0.1451  |
| 14     | 19.570        | BB   | 0.1808      | 20.15080     | 1.74433      | 0.2113  |
| 15     | 19.983        | BV   | 0.1038      | 16.59275     | 2.42658      | 0.1740  |
| 16     | 20.199        | VV   | 0.1155      | 82.05315     | 10.23953     | 0.8602  |
| 17     | 20.546        | VB   | 0.1115      | 26.82783     | 3.57529      | 0.2813  |
| 18     | 20.788        | BV   | 0.1174      | 7.54420      | 1.08062      | 0.0791  |
| 19     | 21.014        | VB   | 0.1096      | 21.30884     | 2.97477      | 0.2234  |
| 20     | 21.493        | BB   | 0.1949      | 32.57446     | 2.19746      | 0.3415  |
| 21     | 21.858        | BV   | 0.0866      | 9.82635      | 1.77480      | 0.1030  |
| 22     | 21.961        | VB   | 0.0962      | 12.97055     | 2.03957      | 0.1360  |

Totals : 9538.65762 1638.23433

Signal 2: DAD1 B, Sig=254,16 Ref=off

| Peak # | RetTime [min] | Type | Width [min] | Area [mAU*s] | Height [mAU] | Area %  |
|--------|---------------|------|-------------|--------------|--------------|---------|
| 1      | 15.009        | BV   | 0.1187      | 19.69266     | 2.59083      | 0.2165  |
| 2      | 15.260        | VV   | 0.0960      | 22.51476     | 3.54811      | 0.2475  |
| 3      | 15.363        | VB   | 0.0843      | 17.73131     | 3.11892      | 0.1949  |
| 4      | 15.922        | BB   | 0.1068      | 33.91423     | 4.55857      | 0.3729  |
| 5      | 16.420        | BV   | 0.1261      | 40.41064     | 4.35957      | 0.4443  |
| 6      | 16.794        | VV   | 0.0890      | 8576.89941   | 1493.45435   | 94.2937 |
| 7      | 17.242        | VB   | 0.1033      | 9.02361      | 1.32713      | 0.0992  |
| 8      | 17.670        | BB   | 0.0946      | 26.00756     | 4.29688      | 0.2859  |
| 9      | 18.307        | BV   | 0.1263      | 10.75583     | 1.33136      | 0.1182  |
| 10     | 18.495        | VB   | 0.1118      | 57.88004     | 7.68681      | 0.6363  |
| 11     | 18.827        | BB   | 0.0849      | 8.41770      | 1.56167      | 0.0925  |
| 12     | 19.022        | BV   | 0.1052      | 30.40357     | 4.47882      | 0.3343  |
| 13     | 19.146        | VB   | 0.0911      | 14.91885     | 2.44737      | 0.1640  |
| 14     | 19.573        | BB   | 0.1808      | 21.14986     | 1.83007      | 0.2325  |
| 15     | 19.983        | BV   | 0.1054      | 17.28123     | 2.47573      | 0.1900  |
| 16     | 20.199        | VV   | 0.1161      | 79.53284     | 9.85869      | 0.8744  |
| 17     | 20.547        | VB   | 0.1101      | 27.89582     | 3.77982      | 0.3067  |
| 18     | 20.790        | BV   | 0.1195      | 7.68341      | 1.07381      | 0.0845  |
| 19     | 21.014        | VB   | 0.1103      | 20.02006     | 2.77150      | 0.2201  |

Data File C:\Chem32\1\Data\NHC\KGP471\_Concentrated.D  
 Sample Name: KGP471\_Concentrated

| Peak # | RetTime [min] | Type | Width [min] | Area [mAU*s] | Height [mAU] | Area % |
|--------|---------------|------|-------------|--------------|--------------|--------|
| 20     | 21.493        | BB   | 0.2000      | 31.95560     | 2.09449      | 0.3513 |
| 21     | 21.857        | BV   | 0.0864      | 9.35524      | 1.69430      | 0.1029 |
| 22     | 21.962        | VB   | 0.0963      | 12.49788     | 1.96129      | 0.1374 |

Totals : 9095.94211 1562.30010

Signal 3: DAD1 C, Sig=210,8 Ref=off

| Peak # | RetTime [min] | Type | Width [min] | Area [mAU*s] | Height [mAU] | Area %  |
|--------|---------------|------|-------------|--------------|--------------|---------|
| 1      | 14.702        | VB   | 0.1445      | 20.89368     | 2.33278      | 0.1015  |
| 2      | 15.036        | BV   | 0.1198      | 380.04733    | 51.67448     | 1.8457  |
| 3      | 15.258        | VB   | 0.1079      | 353.74332    | 49.17688     | 1.7180  |
| 4      | 15.760        | BV   | 0.1364      | 101.28828    | 10.15446     | 0.4919  |
| 5      | 15.923        | VB   | 0.0902      | 350.39801    | 58.23767     | 1.7017  |
| 6      | 16.419        | BV   | 0.1264      | 459.97971    | 50.44131     | 2.2339  |
| 7      | 16.795        | VB   | 0.1086      | 1.59109e4    | 2360.23047   | 77.2715 |
| 8      | 17.248        | BB   | 0.1050      | 20.54396     | 3.19528      | 0.0998  |
| 9      | 17.488        | BV   | 0.0982      | 94.50442     | 14.84969     | 0.4590  |
| 10     | 17.670        | VB   | 0.1092      | 115.13950    | 15.41124     | 0.5592  |
| 11     | 18.296        | BV   | 0.1542      | 125.05814    | 11.74608     | 0.6073  |
| 12     | 18.492        | VB   | 0.1226      | 289.30923    | 34.22702     | 1.4050  |
| 13     | 18.823        | BB   | 0.0913      | 43.79387     | 7.59260      | 0.2127  |
| 14     | 19.046        | BV   | 0.0992      | 31.37870     | 5.00320      | 0.1524  |
| 15     | 19.153        | VB   | 0.1094      | 46.74327     | 5.96928      | 0.2270  |
| 16     | 19.445        | BV   | 0.0908      | 52.65433     | 8.92726      | 0.2557  |
| 17     | 19.590        | VB   | 0.1255      | 72.24635     | 8.82945      | 0.3509  |
| 18     | 19.972        | BB   | 0.1197      | 49.28241     | 6.13389      | 0.2393  |
| 19     | 20.199        | BV   | 0.0973      | 211.37521    | 32.75731     | 1.0265  |
| 20     | 20.360        | VV   | 0.0844      | 31.71260     | 5.74937      | 0.1540  |
| 21     | 20.549        | VB   | 0.0977      | 107.52854    | 17.02164     | 0.5222  |
| 22     | 20.815        | BB   | 0.1320      | 50.41508     | 6.39358      | 0.2448  |
| 23     | 21.109        | BB   | 0.1056      | 34.80313     | 5.09877      | 0.1690  |
| 24     | 21.335        | BV   | 0.0851      | 19.84887     | 3.55851      | 0.0964  |
| 25     | 21.564        | VV   | 0.1601      | 51.62708     | 4.23828      | 0.2507  |
| 26     | 21.695        | VB   | 0.0920      | 30.91896     | 5.15103      | 0.1502  |
| 27     | 21.856        | BV   | 0.0713      | 13.69423     | 2.99670      | 0.0665  |
| 28     | 21.970        | VB   | 0.0986      | 45.20246     | 7.06660      | 0.2195  |
| 29     | 22.209        | BB   | 0.0942      | 24.45537     | 4.18358      | 0.1188  |
| 30     | 22.490        | BV   | 0.1015      | 116.57590    | 17.55134     | 0.5662  |
| 31     | 22.669        | VB   | 0.1075      | 1334.84619   | 186.52919    | 6.4827  |

Totals : 2.05909e4 3002.42895

Data File C:\Chem32\1\Data\NHC\KGP471\_Concentrated.D  
 Sample Name: KGP471\_Concentrated

Signal 4: DAD1 D, Sig=230,16 Ref=off

| Peak # | RetTime [min] | Type | Width [min] | Area [mAU*s] | Height [mAU] | Area %  |
|--------|---------------|------|-------------|--------------|--------------|---------|
| 1      | 15.031        | BV   | 0.1231      | 123.01094    | 16.11219     | 0.8704  |
| 2      | 15.259        | VB   | 0.1177      | 137.69258    | 17.14124     | 0.9743  |
| 3      | 15.760        | BV   | 0.1358      | 32.35648     | 3.26066      | 0.2289  |
| 4      | 15.923        | VB   | 0.0837      | 103.20261    | 18.89578     | 0.7302  |
| 5      | 16.418        | BV   | 0.1237      | 180.76074    | 19.94655     | 1.2790  |
| 6      | 16.794        | VB   | 0.0935      | 1.20898e4    | 2030.49292   | 85.5450 |
| 7      | 17.247        | BB   | 0.1021      | 15.79870     | 2.48903      | 0.1118  |
| 8      | 17.486        | BV   | 0.0989      | 28.58271     | 4.57275      | 0.2022  |
| 9      | 17.670        | VB   | 0.1019      | 63.44791     | 9.49903      | 0.4489  |
| 10     | 18.303        | BV   | 0.1372      | 39.76471     | 4.32592      | 0.2814  |
| 11     | 18.493        | VB   | 0.1188      | 138.13828    | 16.99601     | 0.9774  |
| 12     | 18.825        | BB   | 0.0888      | 20.79643     | 3.74540      | 0.1472  |
| 13     | 19.054        | BV   | 0.0984      | 27.34455     | 4.40886      | 0.1935  |
| 14     | 19.151        | VB   | 0.1102      | 39.40737     | 5.09501      | 0.2788  |
| 15     | 19.452        | BV   | 0.0836      | 17.59227     | 3.22742      | 0.1245  |
| 16     | 19.583        | VB   | 0.1305      | 40.85652     | 4.74193      | 0.2891  |
| 17     | 19.980        | BB   | 0.1026      | 27.63213     | 4.10041      | 0.1955  |
| 18     | 20.200        | BV   | 0.0988      | 112.75363    | 17.13424     | 0.7978  |
| 19     | 20.360        | VV   | 0.0832      | 16.33440     | 2.92357      | 0.1156  |
| 20     | 20.548        | VB   | 0.0997      | 65.66751     | 10.12673     | 0.4647  |
| 21     | 20.813        | BB   | 0.1243      | 15.12977     | 2.04473      | 0.1071  |
| 22     | 21.022        | BB   | 0.1382      | 20.19997     | 1.99454      | 0.1429  |
| 23     | 21.339        | BV   | 0.0833      | 8.66180      | 1.59627      | 0.0613  |
| 24     | 21.572        | VV   | 0.1579      | 26.18093     | 2.15257      | 0.1853  |
| 25     | 21.683        | VB   | 0.0943      | 12.75117     | 2.05733      | 0.0902  |
| 26     | 21.851        | BV   | 0.0821      | 11.75560     | 2.20898      | 0.0832  |
| 27     | 21.967        | VB   | 0.0965      | 20.46784     | 3.29585      | 0.1448  |
| 28     | 22.204        | BB   | 0.0991      | 6.07440      | 1.02629      | 0.0430  |
| 29     | 22.488        | BV   | 0.1078      | 55.69608     | 7.75810      | 0.3941  |
| 30     | 22.669        | VB   | 0.1073      | 634.81122    | 88.90147     | 4.4918  |

Totals : 1.41326e4 2312.27178

Signal 5: DAD1 E, Sig=240,4 Ref=off

| Peak # | RetTime [min] | Type | Width [min] | Area [mAU*s] | Height [mAU] | Area %  |
|--------|---------------|------|-------------|--------------|--------------|---------|
| 1      | 1.907         | BB   | 0.1950      | 328.73831    | 25.07483     | 3.3271  |
| 2      | 15.004        | BV   | 0.1061      | 51.31367     | 7.29355      | 0.5193  |
| 3      | 15.263        | VV   | 0.0976      | 62.24531     | 9.60111      | 0.6300  |
| 4      | 15.357        | VB   | 0.0682      | 21.71208     | 4.85475      | 0.2197  |
| 5      | 15.763        | BV   | 0.1371      | 25.40589     | 2.53059      | 0.2571  |
| 6      | 15.923        | VB   | 0.0928      | 72.77342     | 11.65710     | 0.7365  |
| 7      | 16.419        | BV   | 0.1258      | 103.88537    | 11.24391     | 1.0514  |
| 8      | 16.794        | VB   | 0.0888      | 8252.48730   | 1440.60889   | 83.5229 |
| 9      | 17.248        | BB   | 0.0968      | 11.21957     | 1.84825      | 0.1136  |
| 10     | 17.485        | BV   | 0.1008      | 14.97330     | 2.33399      | 0.1515  |
| 11     | 17.671        | VB   | 0.0992      | 42.64151     | 6.61279      | 0.4316  |

Data File C:\Chem32\1\Data\NHC\KGP471\_Concentrated.D  
 Sample Name: KGP471\_Concentrated

| Peak # | RetTime [min] | Type | Width [min] | Area [mAU*s] | Height [mAU] | Area % |
|--------|---------------|------|-------------|--------------|--------------|--------|
| 12     | 18.307        | BV   | 0.1365      | 25.33621     | 2.82830      | 0.2564 |
| 13     | 18.494        | VB   | 0.1159      | 82.44463     | 10.46401     | 0.8344 |
| 14     | 18.827        | BB   | 0.0853      | 11.33137     | 2.08773      | 0.1147 |
| 15     | 19.044        | BV   | 0.1069      | 27.64451     | 4.08846      | 0.2798 |
| 16     | 19.148        | VB   | 0.0993      | 27.50285     | 3.94891      | 0.2784 |
| 17     | 19.455        | BV   | 0.0805      | 11.40575     | 2.19782      | 0.1154 |
| 18     | 19.573        | VB   | 0.1374      | 28.12904     | 3.11255      | 0.2847 |
| 19     | 19.981        | BV   | 0.1117      | 30.73274     | 4.08729      | 0.3110 |
| 20     | 20.200        | VV   | 0.1193      | 92.54539     | 11.10138     | 0.9366 |
| 21     | 20.548        | VB   | 0.1086      | 42.49094     | 5.85888      | 0.4300 |
| 22     | 20.812        | BV   | 0.1303      | 10.64117     | 1.37527      | 0.1077 |
| 23     | 21.014        | VB   | 0.1086      | 23.62852     | 3.33868      | 0.2391 |
| 24     | 21.340        | BV   | 0.0902      | 7.94307      | 1.35793      | 0.0804 |
| 25     | 21.496        | VV   | 0.2137      | 44.34917     | 2.67170      | 0.4489 |
| 26     | 21.851        | VV   | 0.0976      | 15.62197     | 2.34779      | 0.1581 |
| 27     | 21.967        | VB   | 0.1020      | 17.11787     | 2.55977      | 0.1732 |
| 28     | 22.485        | BV   | 0.1276      | 48.70327     | 5.48500      | 0.4929 |
| 29     | 22.669        | VB   | 0.1084      | 345.54871    | 47.74048     | 3.4973 |

Totals : 9880.51291 1640.31171

Signal 6: DAD1 F, Sig=280,16 Ref=off

| Peak # | RetTime [min] | Type | Width [min] | Area [mAU*s] | Height [mAU] | Area %  |
|--------|---------------|------|-------------|--------------|--------------|---------|
| 1      | 15.054        | BV   | 0.1090      | 21.55566     | 2.89076      | 0.3510  |
| 2      | 15.253        | VB   | 0.1328      | 25.26513     | 2.70890      | 0.4114  |
| 3      | 15.918        | BV   | 0.1589      | 18.24239     | 1.53263      | 0.2971  |
| 4      | 16.420        | BV   | 0.1314      | 22.02534     | 2.26597      | 0.3587  |
| 5      | 16.795        | VV   | 0.0888      | 5463.79248   | 954.54541    | 88.9759 |
| 6      | 17.665        | VB   | 0.1030      | 49.65844     | 7.32952      | 0.8087  |
| 7      | 18.489        | BB   | 0.1571      | 61.46814     | 5.30905      | 1.0010  |
| 8      | 18.826        | BV   | 0.0900      | 10.56657     | 1.81397      | 0.1721  |
| 9      | 19.155        | VB   | 0.2009      | 27.99067     | 1.95659      | 0.4558  |
| 10     | 19.590        | BB   | 0.1397      | 15.81760     | 1.68285      | 0.2576  |
| 11     | 19.984        | BB   | 0.1088      | 8.06416      | 1.10894      | 0.1313  |
| 12     | 20.200        | BV   | 0.0984      | 48.82339     | 7.45521      | 0.7951  |
| 13     | 20.358        | VV   | 0.0862      | 9.29252      | 1.63643      | 0.1513  |
| 14     | 20.549        | VB   | 0.0976      | 47.25852     | 7.49552      | 0.7696  |
| 15     | 21.105        | BB   | 0.1234      | 8.84723      | 1.01785      | 0.1441  |
| 16     | 21.699        | BV   | 0.2320      | 28.07697     | 1.55971      | 0.4572  |
| 17     | 21.861        | VB   | 0.1606      | 18.40672     | 1.54969      | 0.2997  |
| 18     | 22.670        | BB   | 0.1149      | 255.60170    | 32.81970     | 4.1624  |

Totals : 6140.75362 1036.67870

Data File C:\Chem32\1\Data\NHC\KGP471\_Concentrated.D  
Sample Name: KGP471\_Concentrated

Signal 7: DAD1 G, Sig=300,16 Ref=off

| Peak # | RetTime [min] | Type | Width [min] | Area [mAU*s] | Height [mAU] | Area %  |
|--------|---------------|------|-------------|--------------|--------------|---------|
| 1      | 16.794        | BB   | 0.0889      | 1830.76514   | 319.25458    | 79.8437 |
| 2      | 17.667        | BB   | 0.1006      | 38.43918     | 5.70514      | 1.6764  |
| 3      | 18.490        | BB   | 0.1338      | 70.64924     | 7.37258      | 3.0812  |
| 4      | 18.827        | BV   | 0.0881      | 6.82989      | 1.20498      | 0.2979  |
| 5      | 19.027        | VV   | 0.1107      | 12.07432     | 1.66306      | 0.5266  |
| 6      | 19.158        | VB   | 0.1229      | 11.56161     | 1.48363      | 0.5042  |
| 7      | 19.600        | BB   | 0.1145      | 13.01811     | 1.71548      | 0.5677  |
| 8      | 20.201        | BV   | 0.1000      | 17.34897     | 2.59544      | 0.7566  |
| 9      | 20.357        | VV   | 0.0996      | 9.24838      | 1.38995      | 0.4033  |
| 10     | 20.548        | VB   | 0.0983      | 31.45959     | 4.94228      | 1.3720  |
| 11     | 22.669        | BB   | 0.1117      | 251.54092    | 33.47738     | 10.9703 |

Totals : 2292.93535 380.80451

Signal 8: DAD1 H, Sig=320,16 Ref=off

| Peak # | RetTime [min] | Type | Width [min] | Area [mAU*s] | Height [mAU] | Area %  |
|--------|---------------|------|-------------|--------------|--------------|---------|
| 1      | 11.971        | BB   | 0.0906      | 19.63272     | 3.34000      | 6.8334  |
| 2      | 16.794        | BB   | 0.0954      | 78.59277     | 12.83918     | 27.3551 |
| 3      | 17.672        | BB   | 0.1042      | 18.18523     | 2.64584      | 6.3296  |
| 4      | 18.493        | BB   | 0.1162      | 66.79688     | 8.44772      | 23.2494 |
| 5      | 19.022        | BB   | 0.0961      | 6.15215      | 1.05459      | 2.1413  |
| 6      | 19.602        | BB   | 0.1039      | 7.03116      | 1.02682      | 2.4473  |
| 7      | 20.545        | VB   | 0.0977      | 7.51448      | 1.19022      | 2.6155  |
| 8      | 22.669        | BB   | 0.1096      | 83.40063     | 11.36270     | 29.0285 |

Totals : 287.30603 41.90707

=====  
\*\*\* End of Report \*\*\*

### 39. 2-((tert-butyldimethylsilyloxy)-3-methoxybenzaldehyde

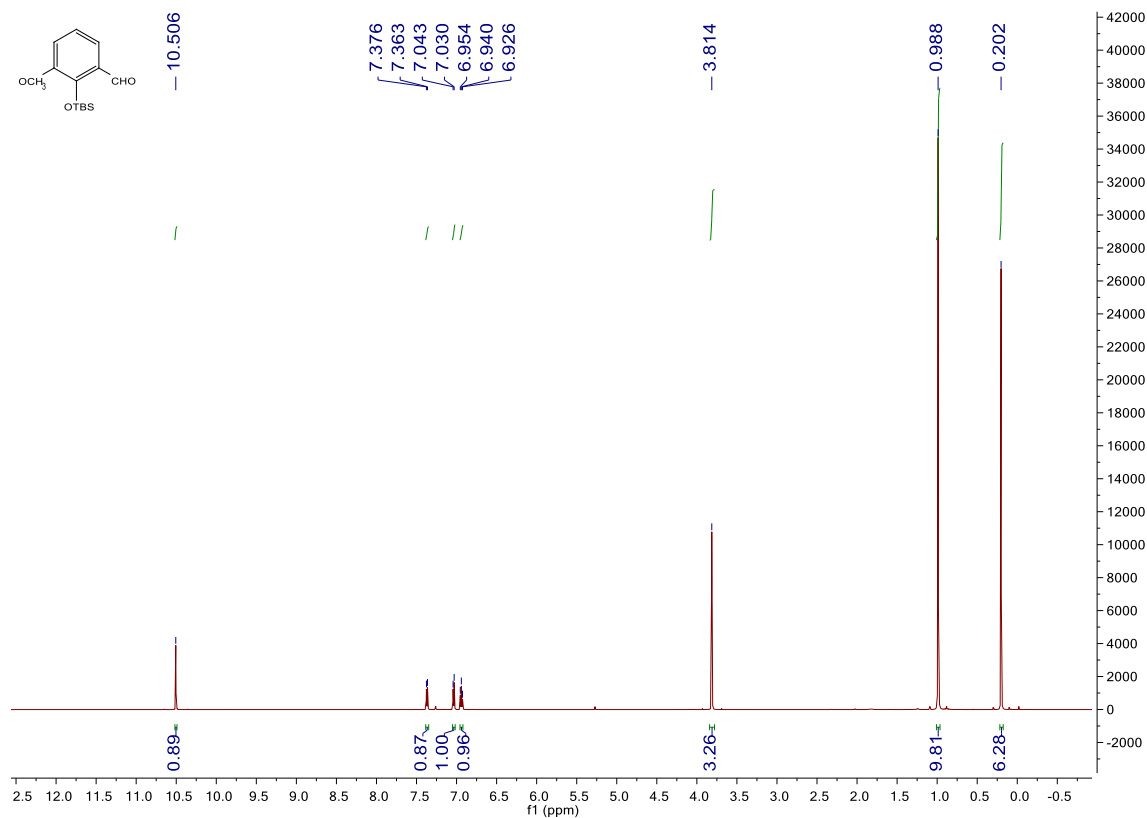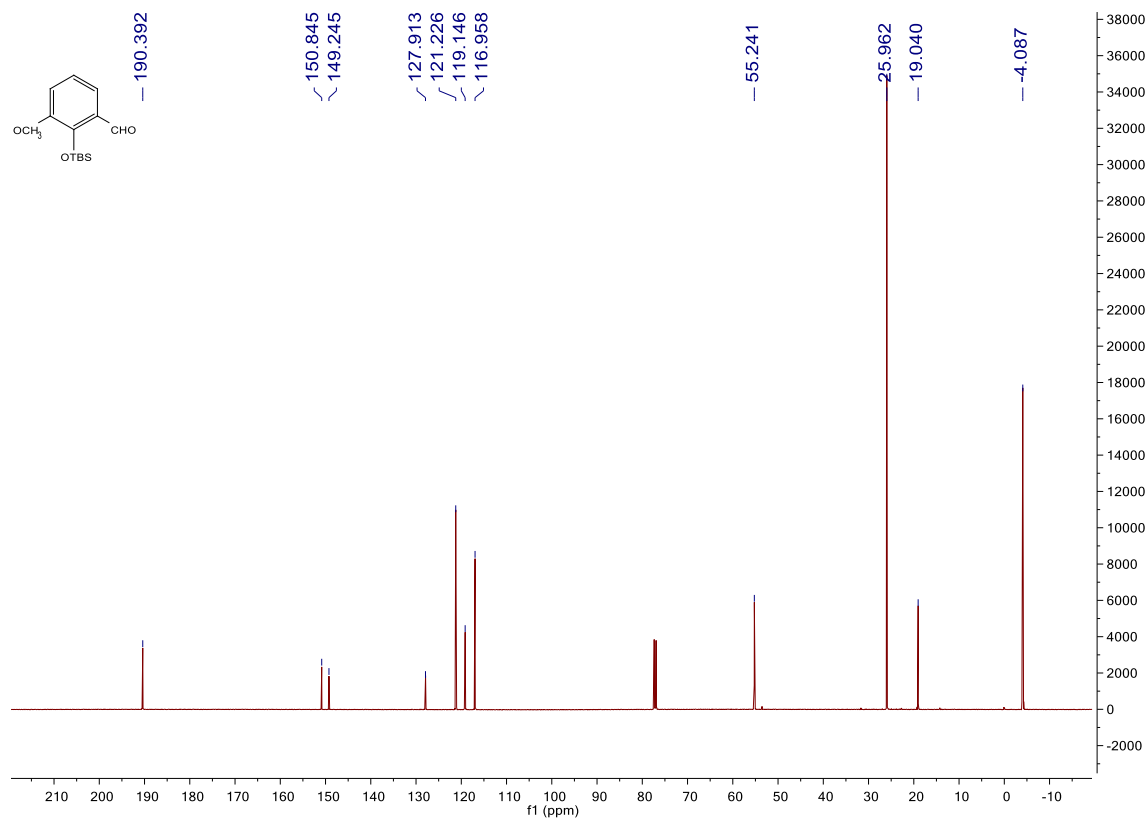



41. ethyl 5-(2-((tert-butyldimethylsilyloxy)-3-methoxyphenyl)-3-oxopentanoate

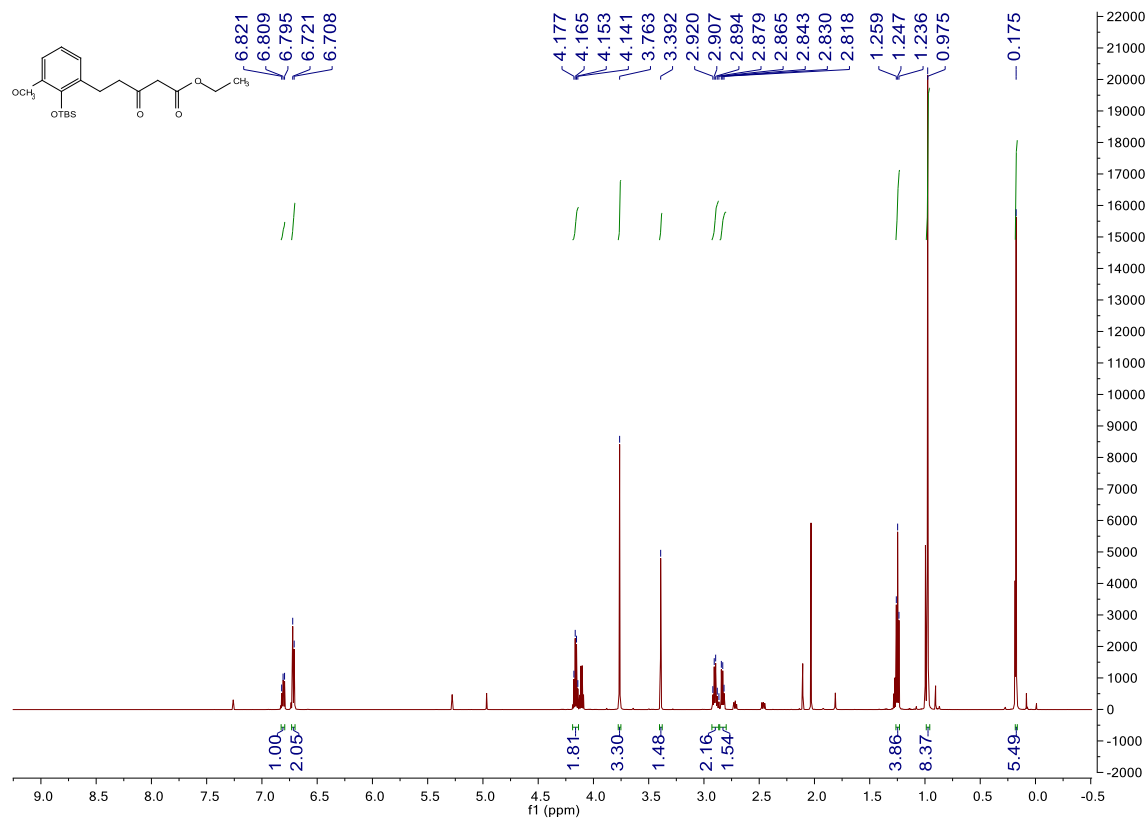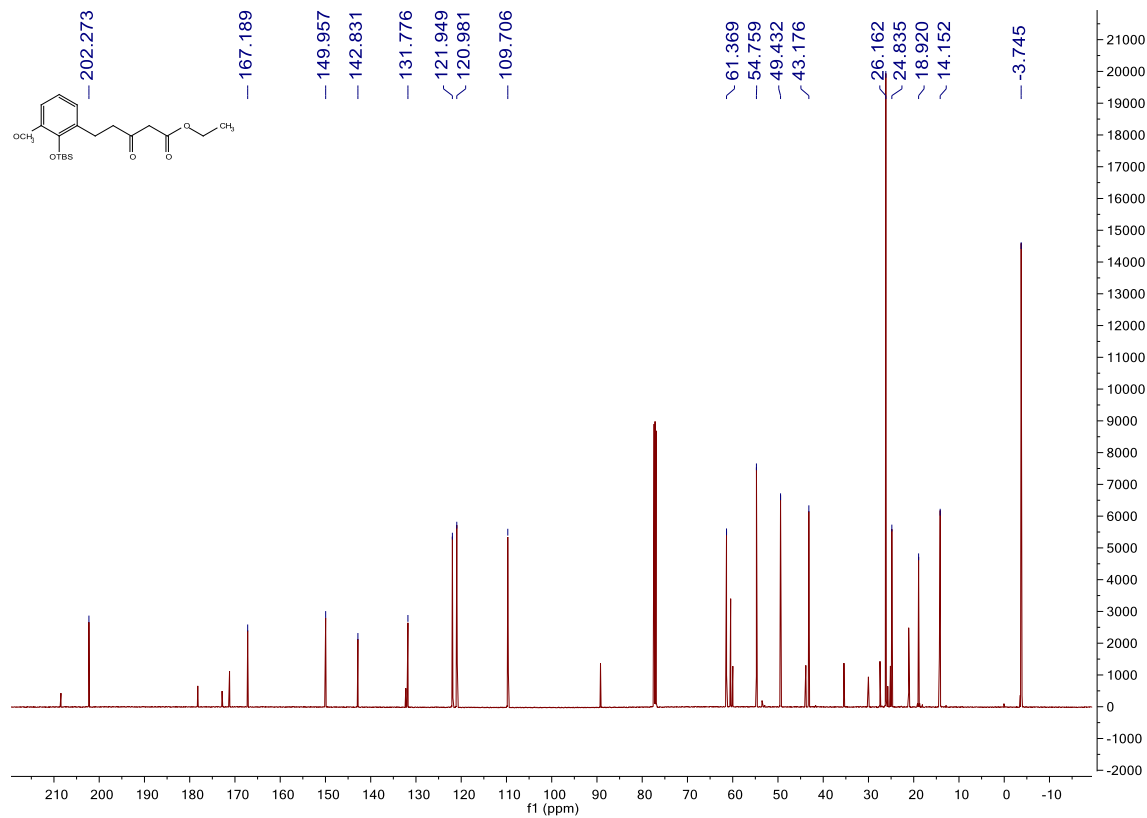

42. ethyl (Z)-3-amino-5-((tert-butyldimethylsilyloxy)-3-methoxyphenyl)pent-2-enoate

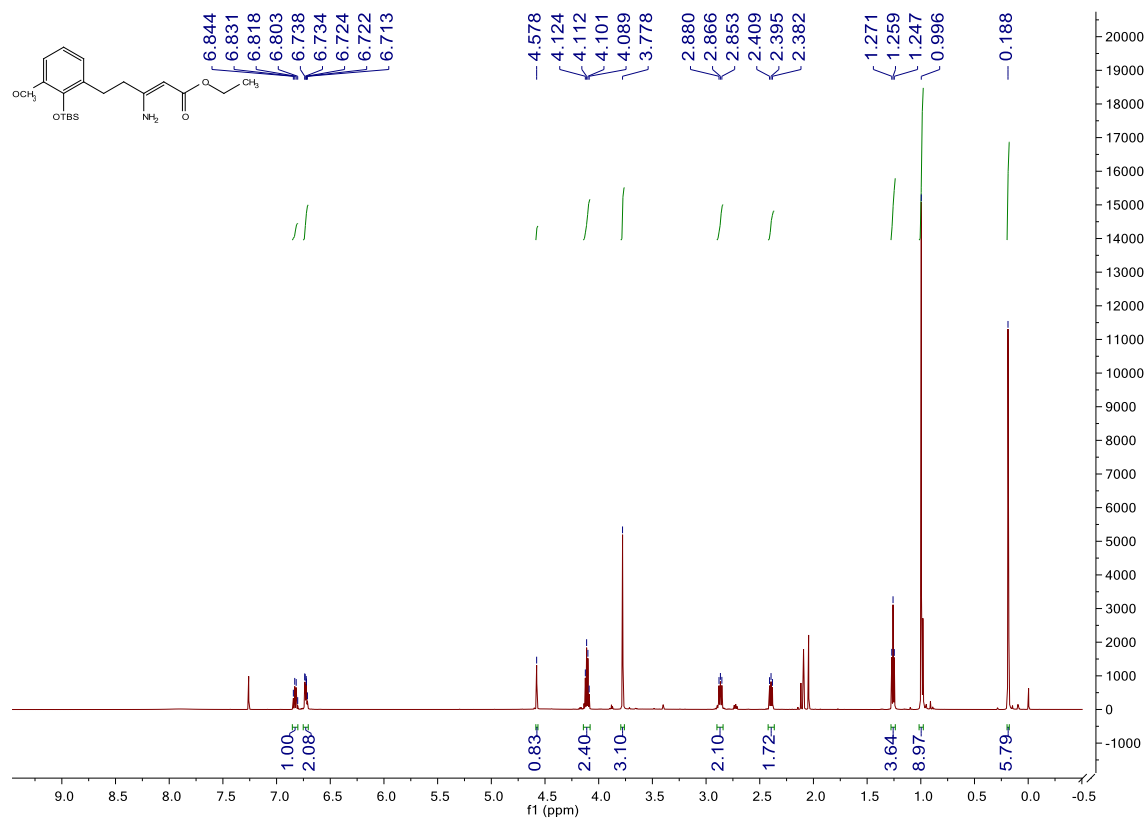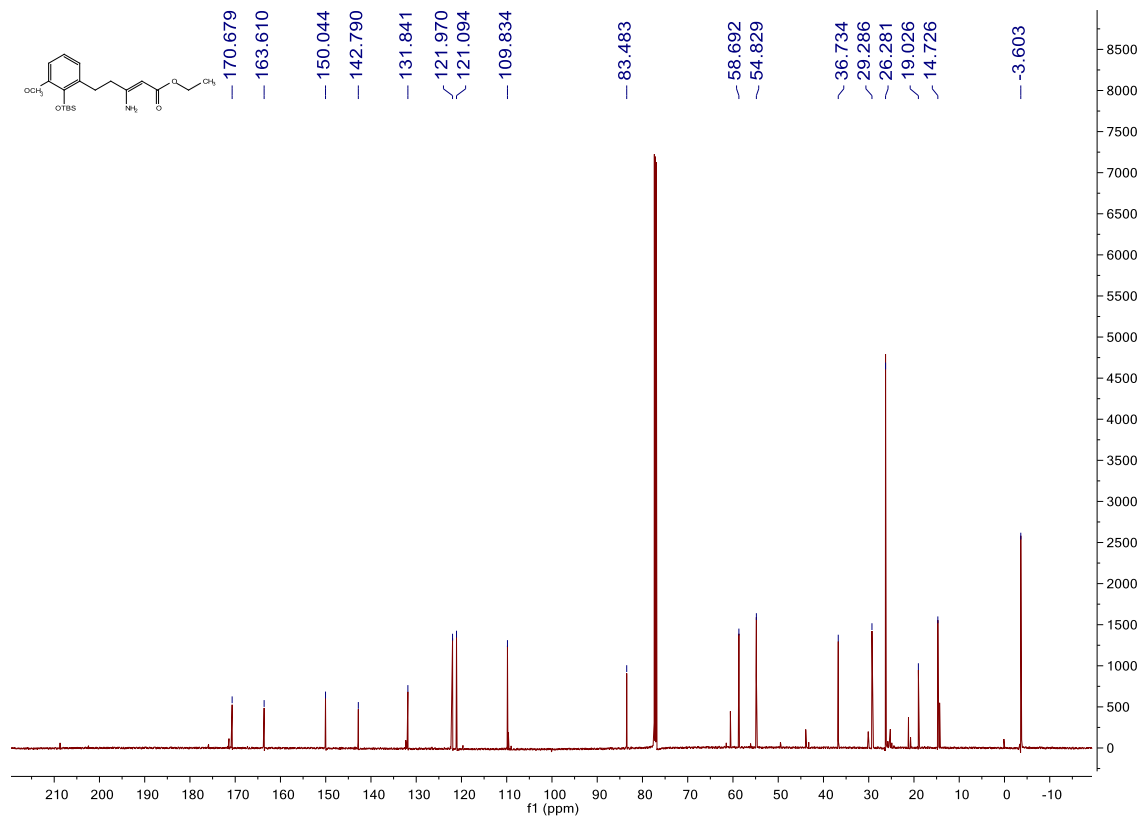

43. ethyl (Z)-3-acetamido-5-(2-((tert-butyldimethylsilyloxy)-3-methoxyphenyl)pent-2-enoate

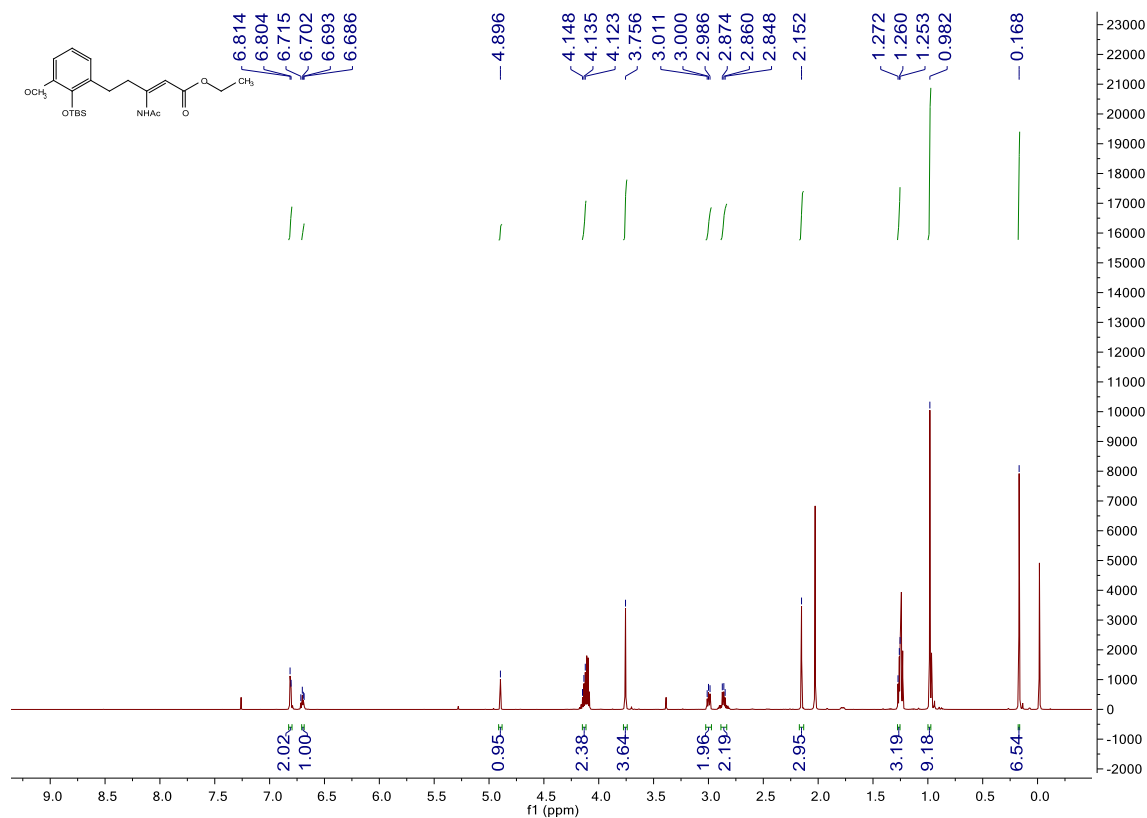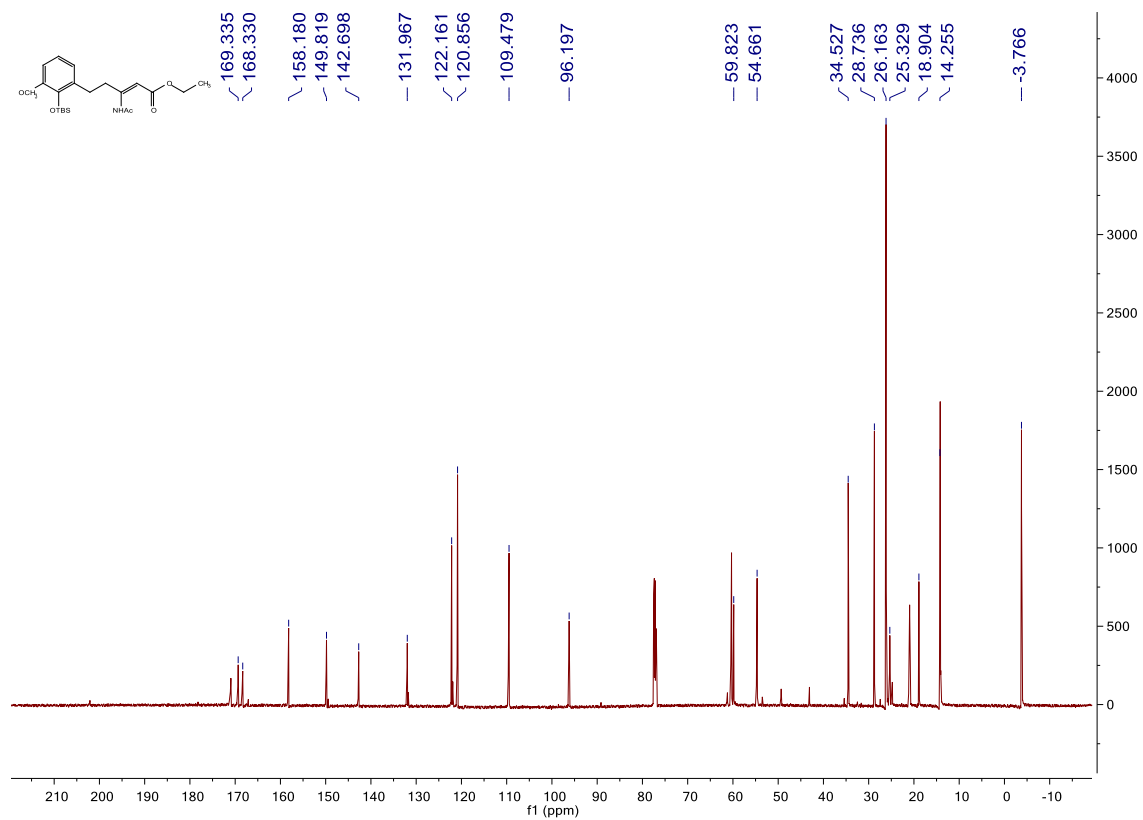

44. ethyl 3-acetamido-5-(2-((tert-butyldimethylsilyloxy)-3-methoxyphenyl)pentanoate

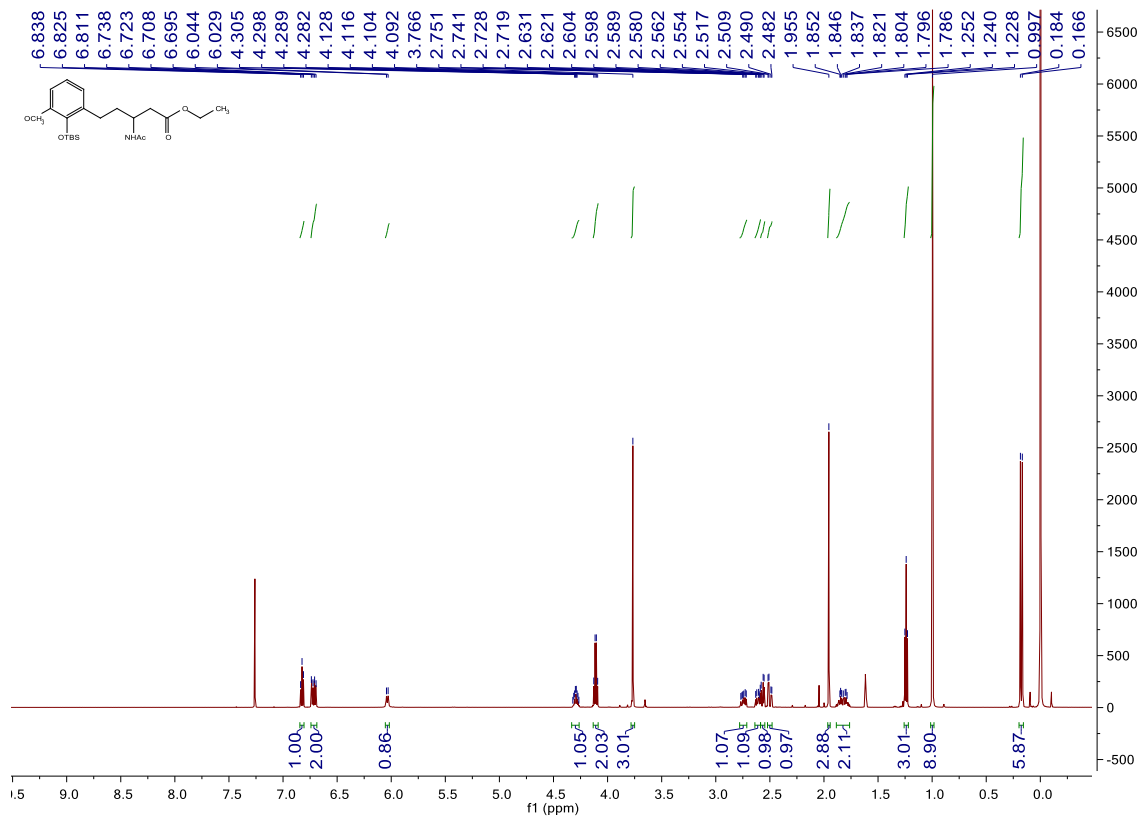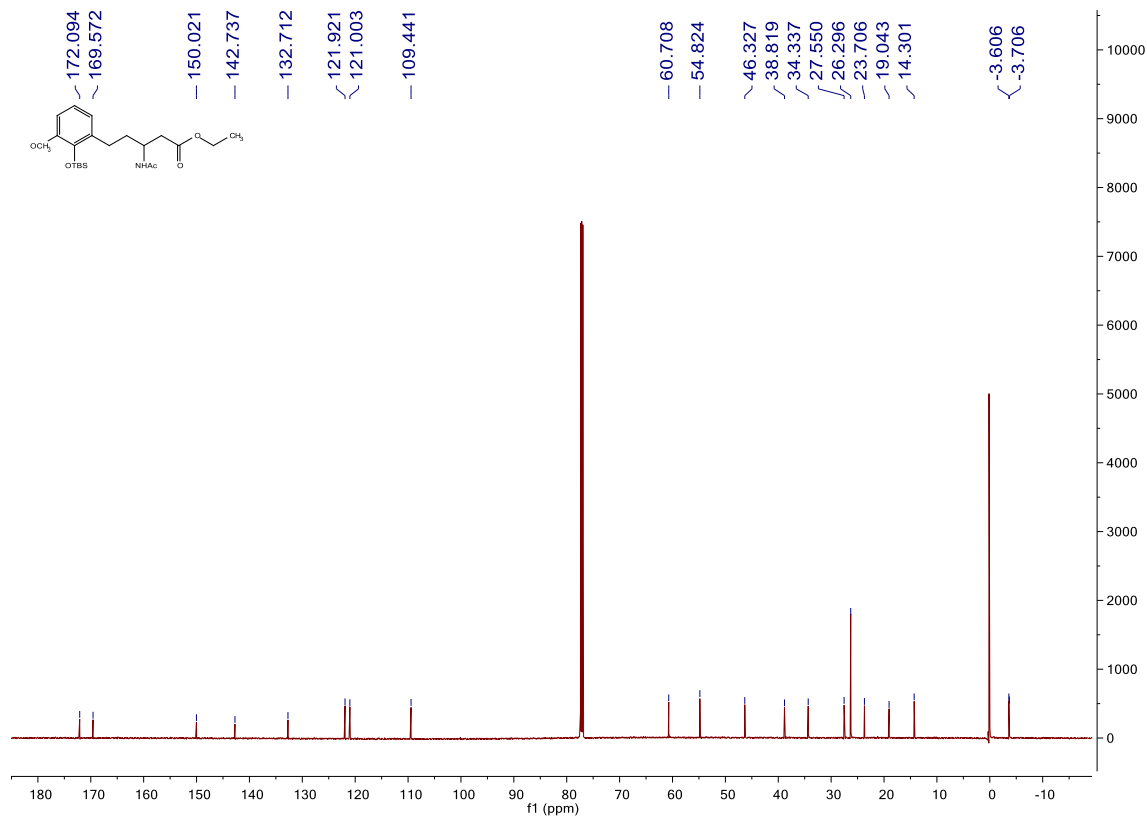

45. 3-acetamido-5-(2-hydroxy-3-methoxyphenyl)pentanoic acid

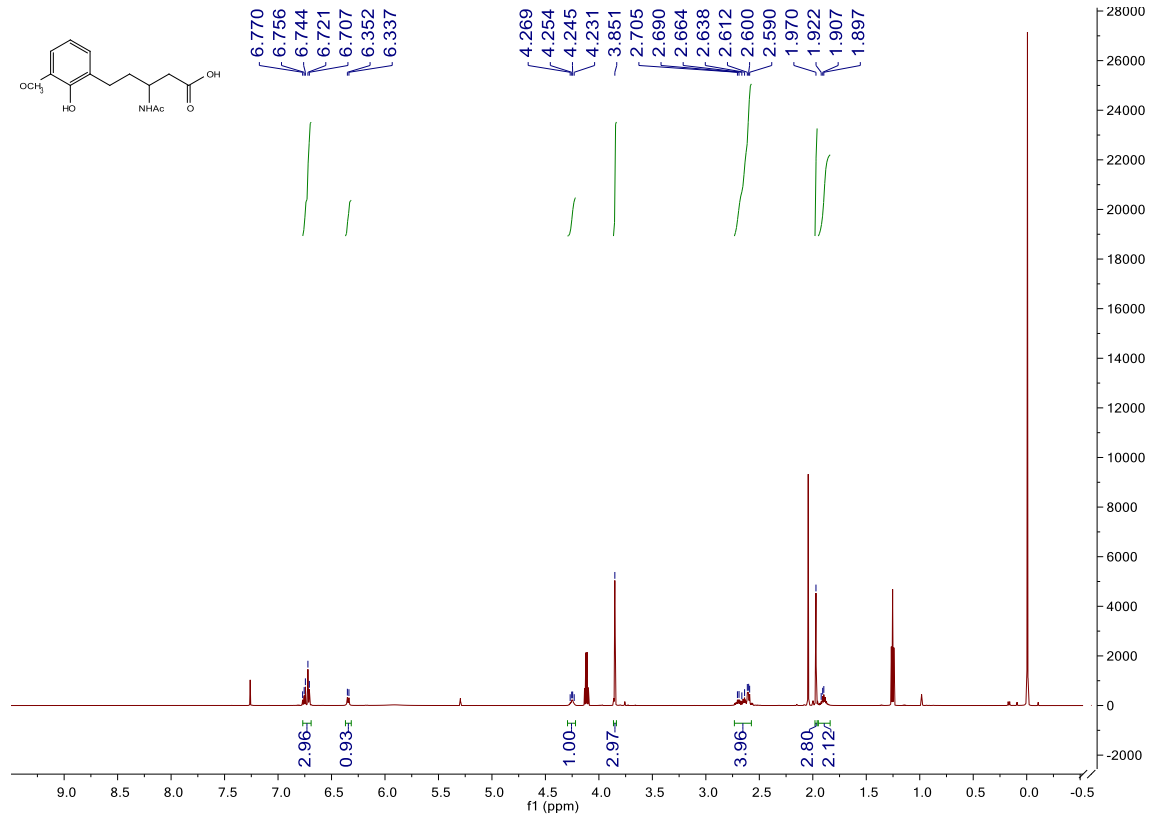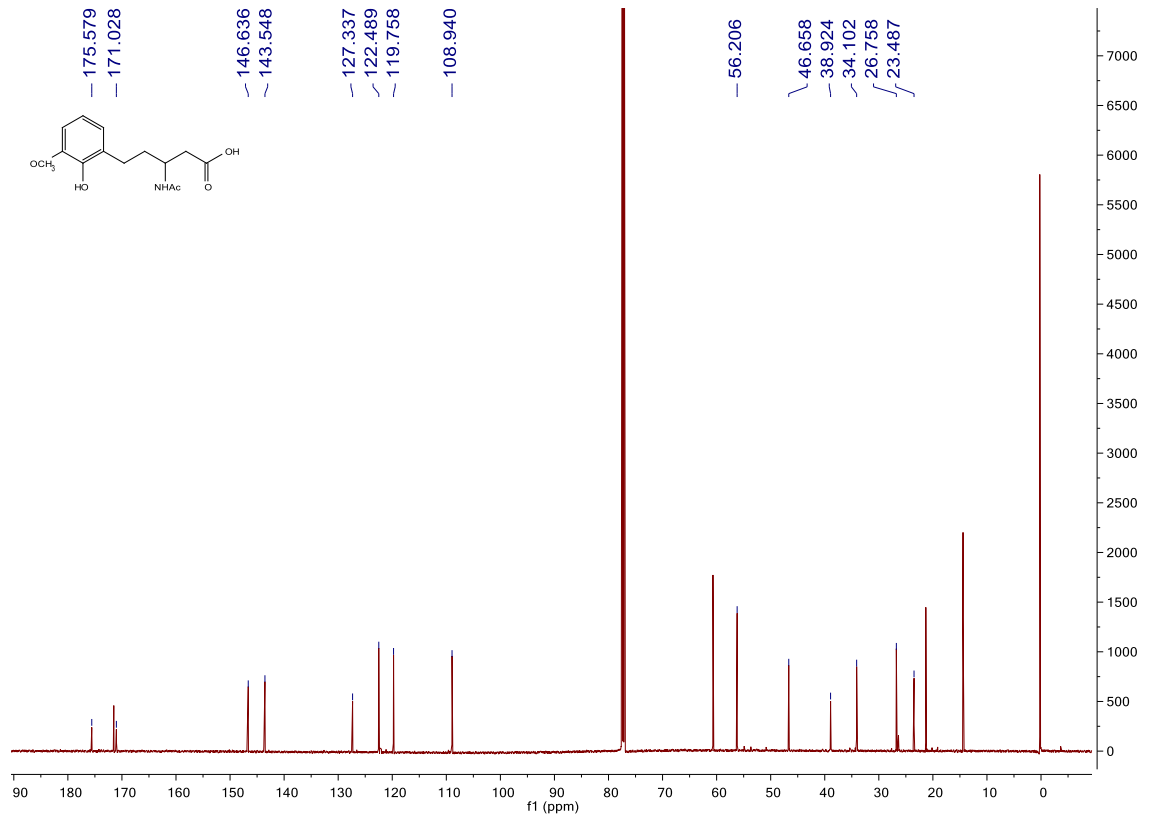

46. N-(1-hydroxy-2-methoxy-5-oxo-6,7,8,9-tetrahydro-5H-benzo[7]annulen-7-yl)acetamide

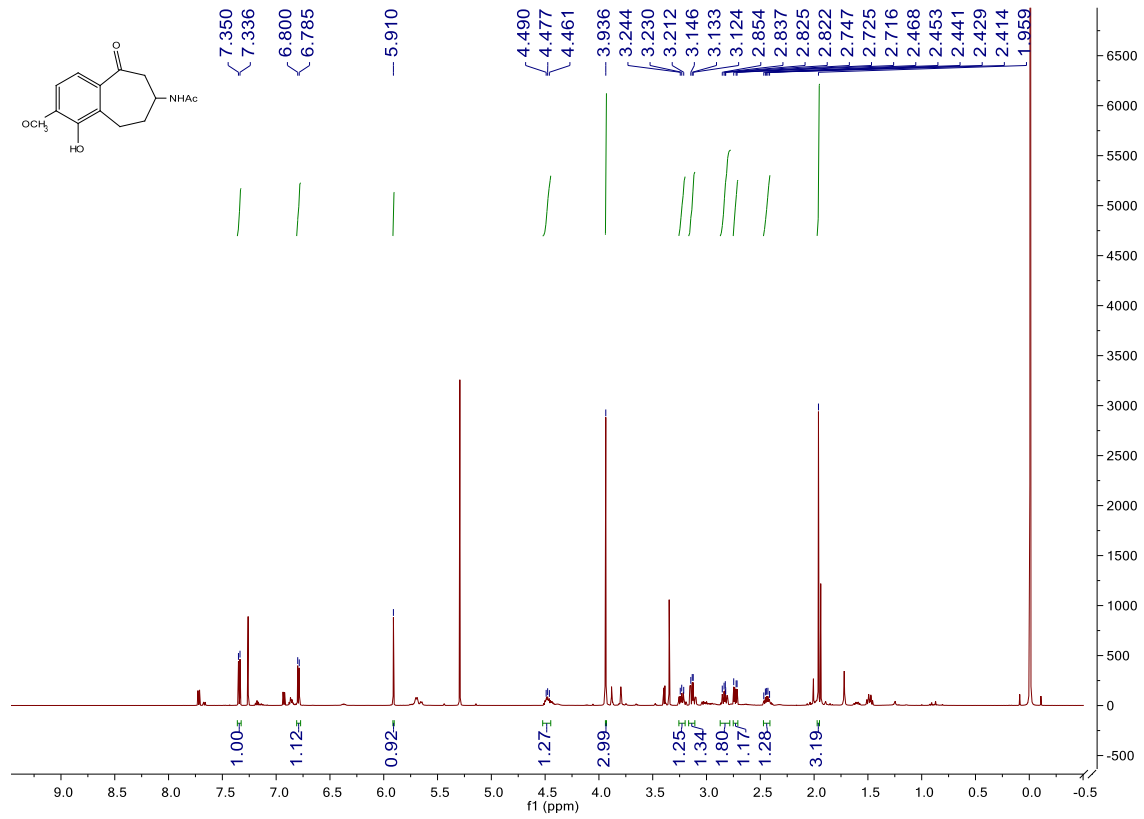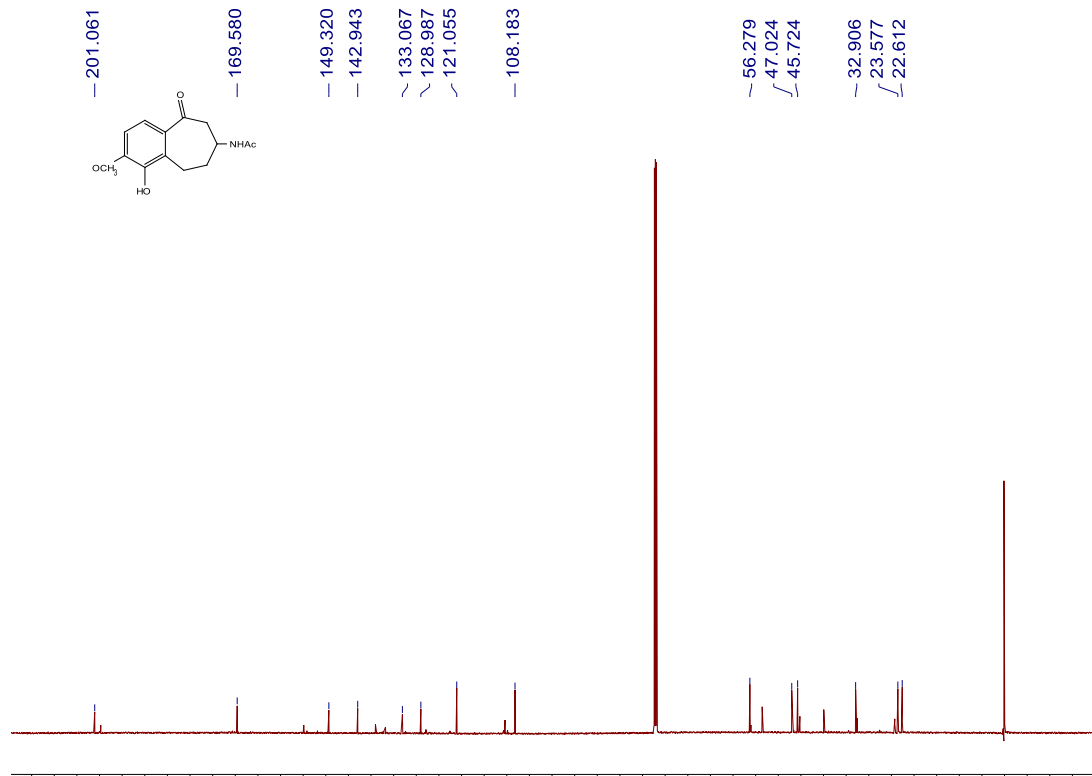

**47. N-(1-((tert-butyldimethylsilyloxy)-2-methoxy-5-oxo-6,7,8,9-tetrahydro-5H-benzo[7]annulen-7-yl)acetamide**

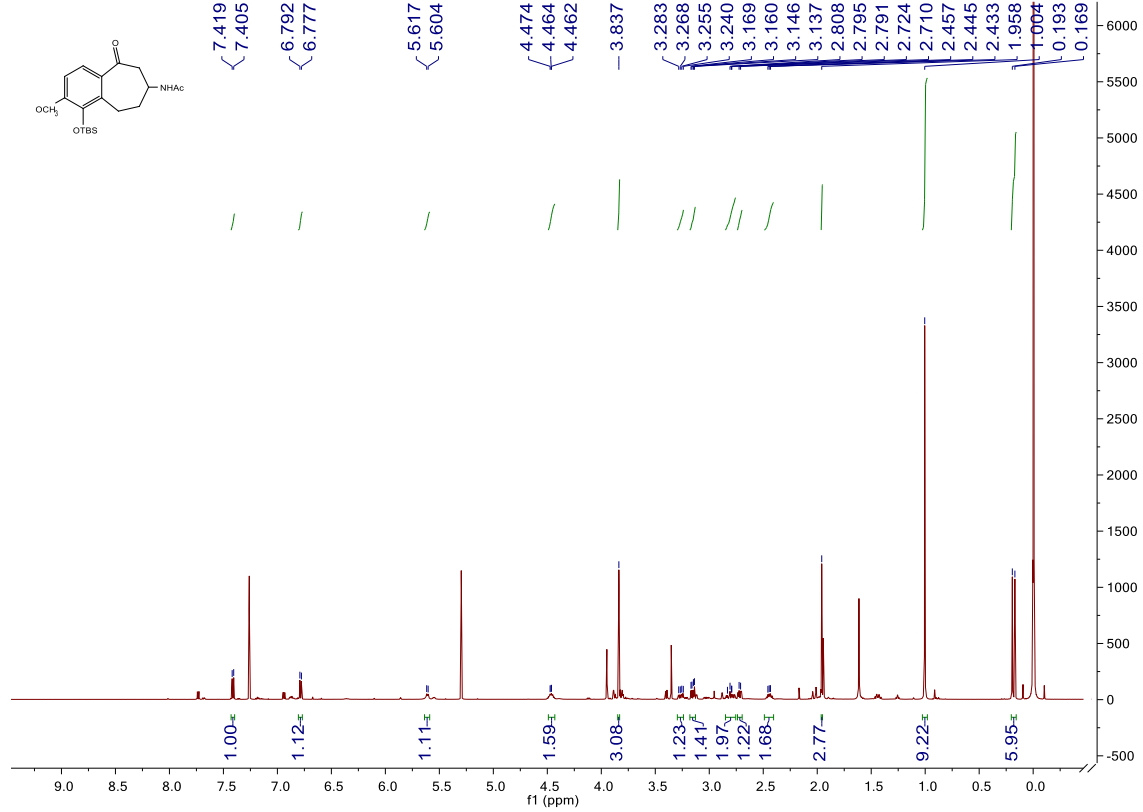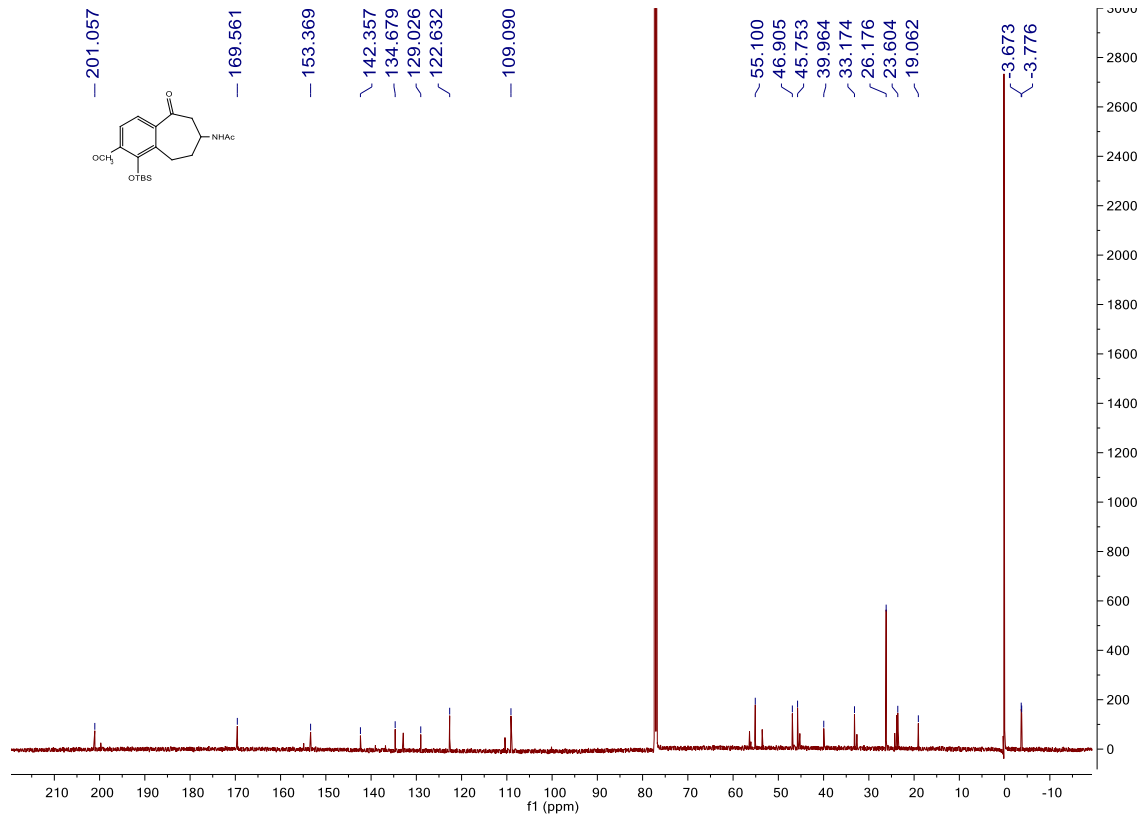

**48. N-(1-((tert-butyldimethylsilyloxy)-2-methoxy-5-(3,4,5-trimethoxyphenyl)-6,7,8,9-tetrahydro-5H-benzo[7]annulen-7-yl)acetamide**

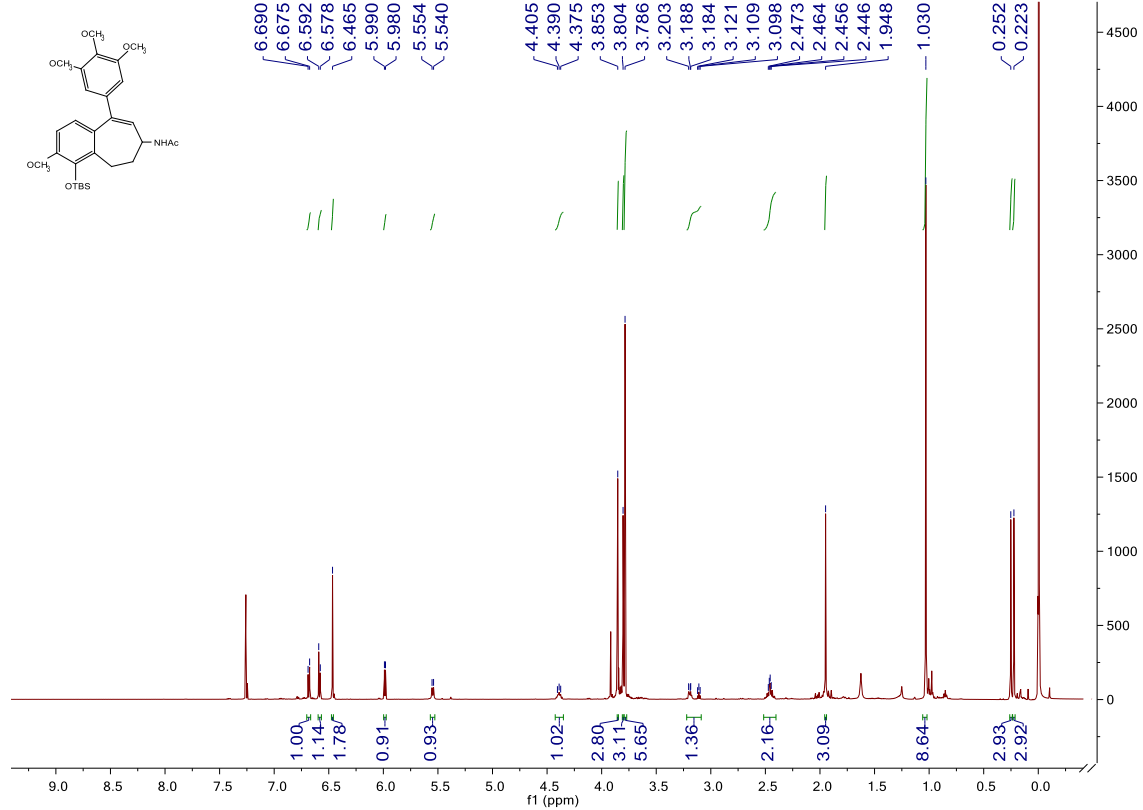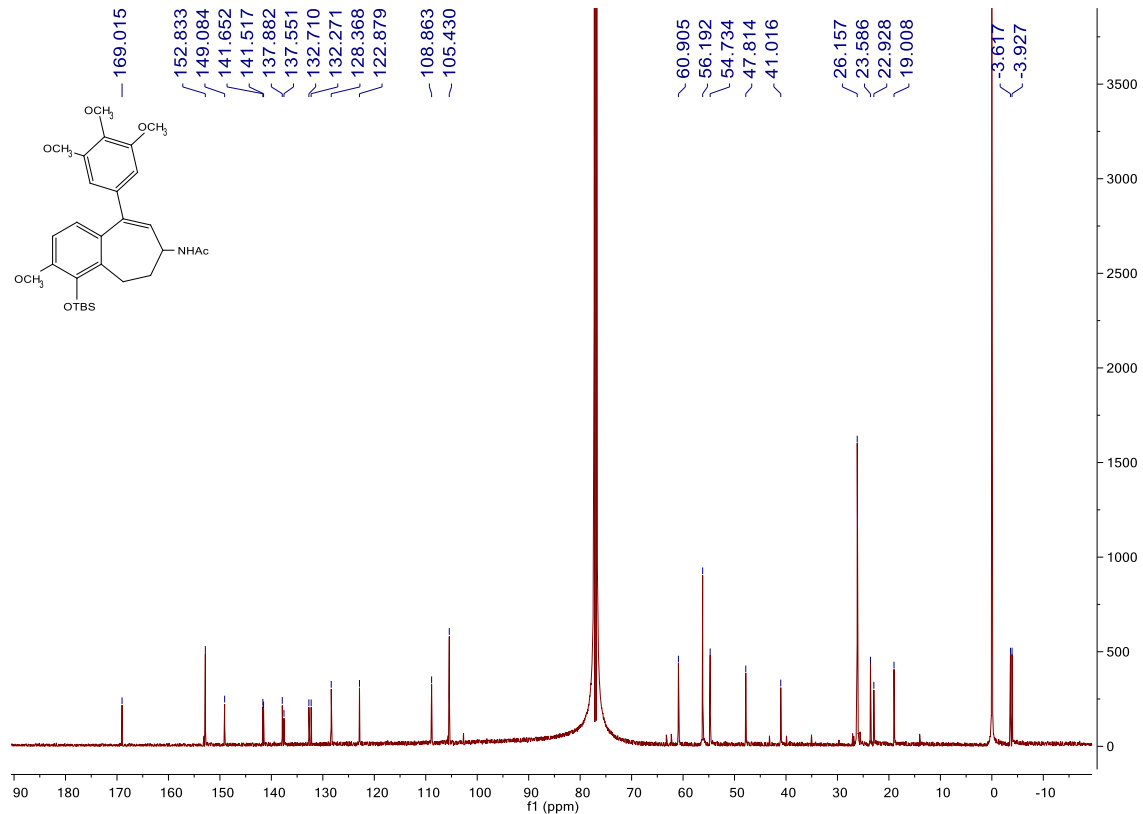



**49. N-(1-hydroxy-2-methoxy-5-(3,4,5-trimethoxyphenyl)-6,7,8,9-tetrahydro-5H-benzo[7]annulen-7-yl)acetamide**

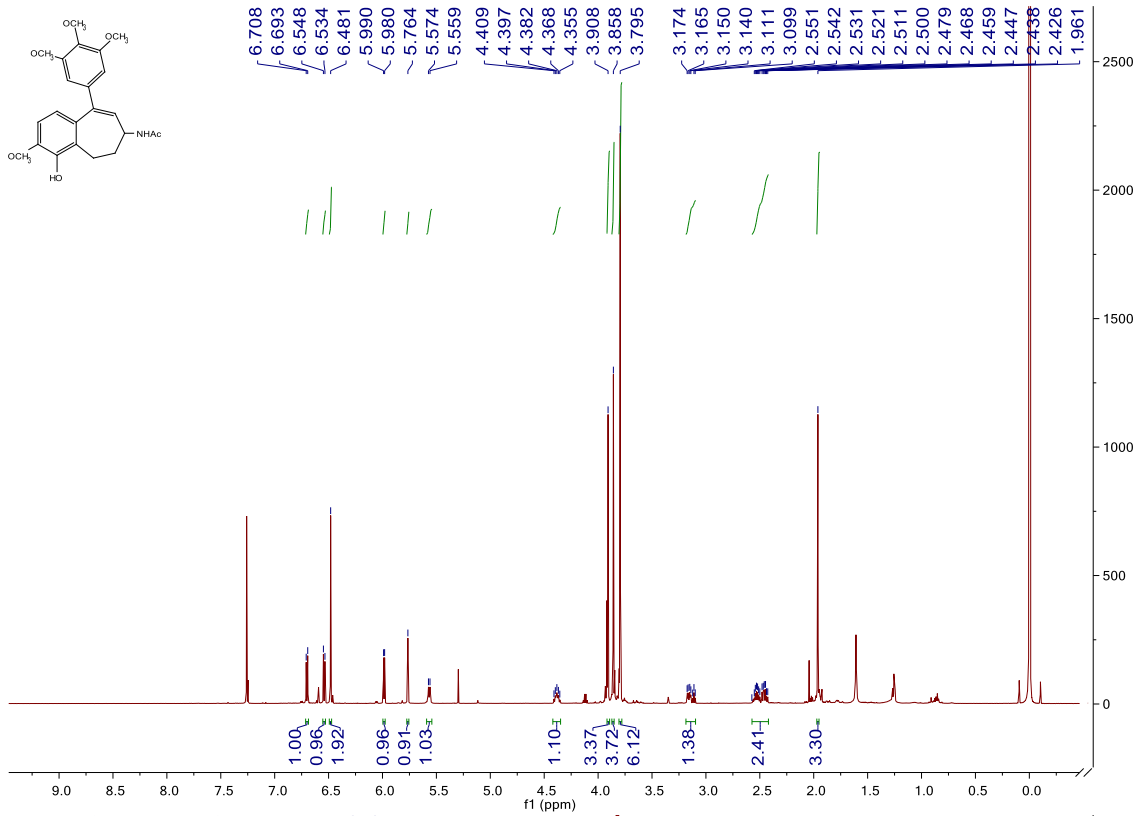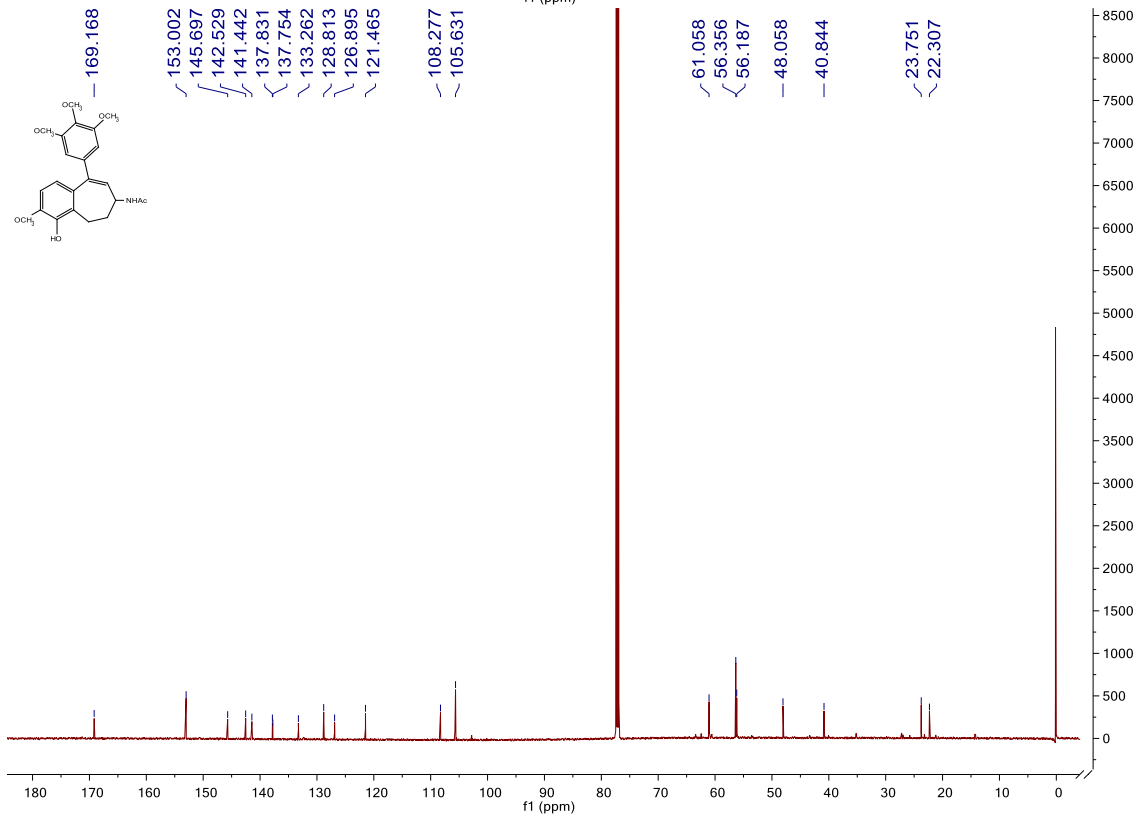

NHC\_3\_08\_final\_Orbitrap #215 RT: 1.78 AV: 1 NL: 1.97E7  
T: FTMS + p ESTFull ms [200.00-800.00]

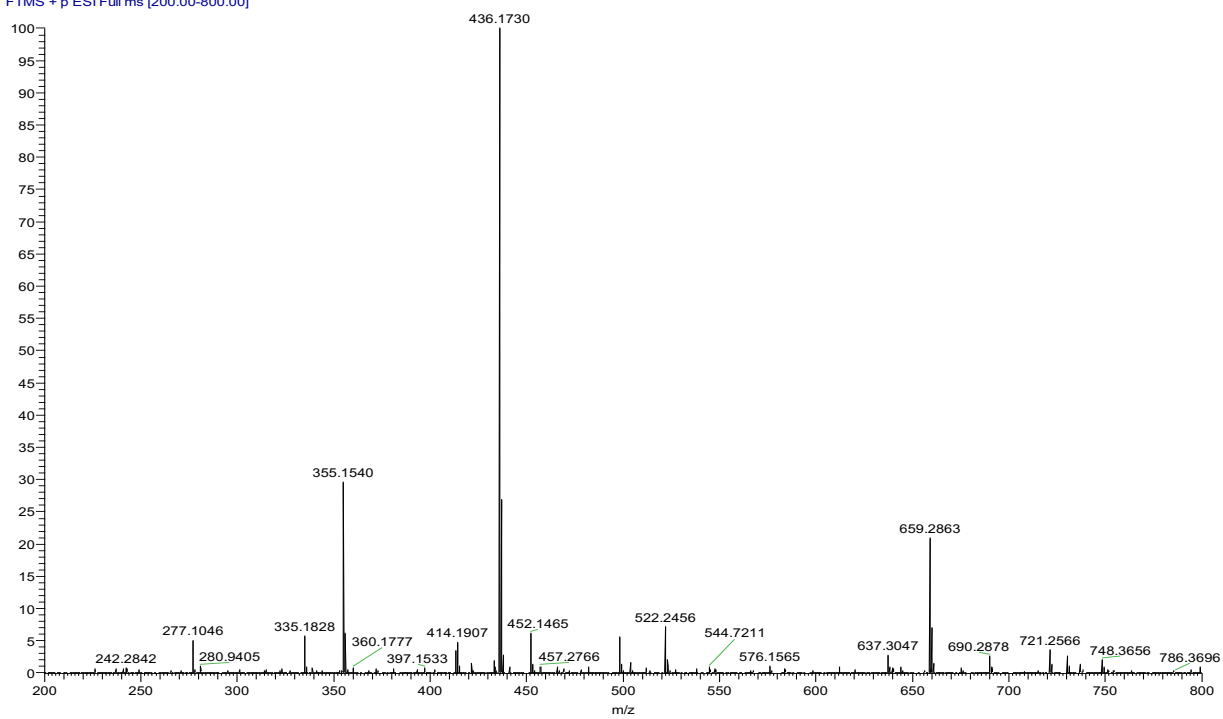

Data File C:\CHEM32\1\DATA\HAICHAN NIU\KGP472SAMPLE001.D  
Sample Name: KGP472sample

=====  
Acq. Operator : Haichan Niu  
Acq. Instrument : Instrument 1 Location : -  
Injection Date : 11/19/2015 11:51:41 AM  
Acq. Method : C:\CHEM32\1\METHODS\MASTERMETHOD.M  
Last changed : 11/19/2015 11:44:37 AM by Haichan Niu  
Analysis Method : C:\CHEM32\1\DATA\HAICHAN NIU\KGP472SAMPLE001.D\DA.M (MASTERMETHOD.M)  
Last changed : 11/19/2015 12:43:09 PM by Haichan Niu

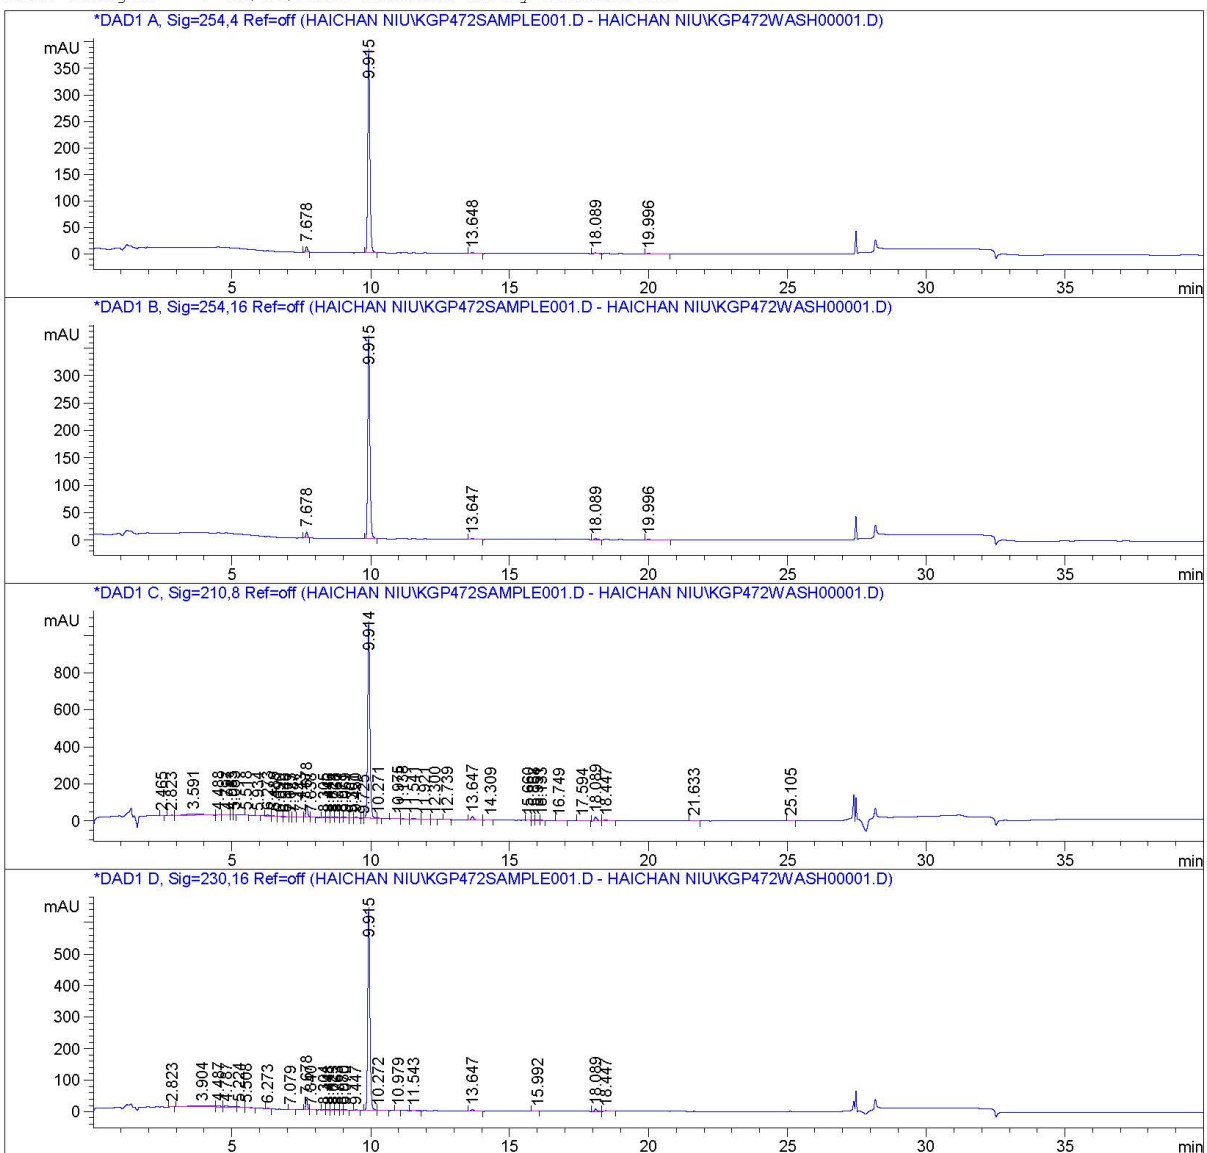

Data File C:\CHEM32\1\DATA\HAICHAN NIU\KGP472SAMPLE001.D  
Sample Name: KGP472sample

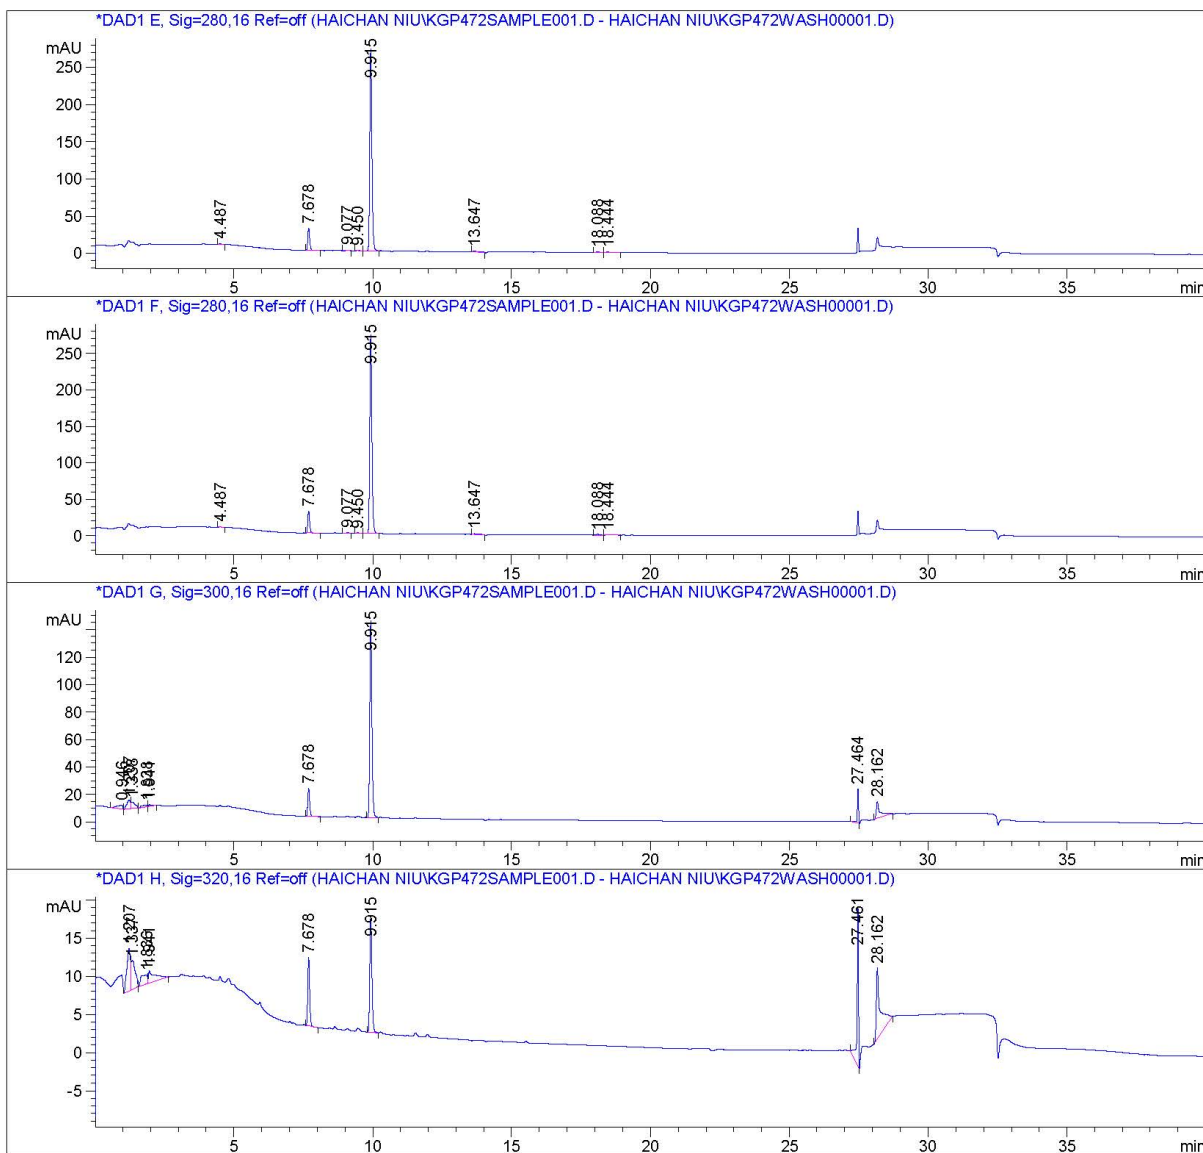

=====  
Area Percent Report  
=====

Sorted By : Signal  
Multiplier : 1.0000  
Dilution : 1.0000  
Use Multiplier & Dilution Factor with ISTDs

Data File C:\CHEM32\1\DATA\HAICHAN NIU\KGP472SAMPLE001.D  
Sample Name: KGP472sample

Signal 1: DAD1 A, Sig=254,4 Ref=off  
Signal has been modified after loading from rawdata file!

| Peak # | RetTime [min] | Type | Width [min] | Area [mAU*s] | Height [mAU] | Area %  |
|--------|---------------|------|-------------|--------------|--------------|---------|
| 1      | 7.678         | BB   | 0.0711      | 46.21363     | 10.15255     | 2.1300  |
| 2      | 9.915         | VV   | 0.0830      | 2073.97314   | 384.31497    | 95.5878 |
| 3      | 13.648        | BB   | 0.1682      | 23.80234     | 1.92531      | 1.0970  |
| 4      | 18.089        | BB   | 0.1011      | 11.36394     | 1.63549      | 0.5238  |
| 5      | 19.996        | BB   | 0.1441      | 14.35070     | 1.37145      | 0.6614  |

Totals : 2169.70375 399.39977

Signal 2: DAD1 B, Sig=254,16 Ref=off  
Signal has been modified after loading from rawdata file!

| Peak # | RetTime [min] | Type | Width [min] | Area [mAU*s] | Height [mAU] | Area %  |
|--------|---------------|------|-------------|--------------|--------------|---------|
| 1      | 7.678         | BB   | 0.0710      | 49.87946     | 10.97051     | 2.3697  |
| 2      | 9.915         | VV   | 0.0830      | 2002.73462   | 370.84903    | 95.1466 |
| 3      | 13.647        | BB   | 0.1675      | 26.67926     | 2.16874      | 1.2675  |
| 4      | 18.089        | BB   | 0.1004      | 12.34215     | 1.79001      | 0.5864  |
| 5      | 19.996        | BB   | 0.1451      | 13.25722     | 1.25599      | 0.6298  |

Totals : 2104.89270 387.03428

Signal 3: DAD1 C, Sig=210,8 Ref=off  
Signal has been modified after loading from rawdata file!

| Peak # | RetTime [min] | Type | Width [min] | Area [mAU*s] | Height [mAU] | Area % |
|--------|---------------|------|-------------|--------------|--------------|--------|
| 1      | 2.465         | VB   | 0.0730      | 9.21492      | 1.95298      | 0.1193 |
| 2      | 2.823         | BV   | 0.0740      | 13.67571     | 2.84675      | 0.1771 |
| 3      | 3.591         | VB   | 0.5699      | 371.93463    | 8.54350      | 4.8161 |
| 4      | 4.488         | BB   | 0.0692      | 12.43935     | 2.72876      | 0.1611 |
| 5      | 4.797         | BV   | 0.1443      | 29.23532     | 3.09089      | 0.3786 |
| 6      | 4.983         | VV   | 0.0886      | 6.62762      | 1.09460      | 0.0858 |
| 7      | 5.083         | VB   | 0.0706      | 5.55790      | 1.18729      | 0.0720 |
| 8      | 5.518         | BB   | 0.0604      | 6.27346      | 1.64733      | 0.0812 |
| 9      | 5.934         | VB   | 0.0903      | 6.31640      | 1.11128      | 0.0818 |
| 10     | 6.273         | VV   | 0.0864      | 45.44395     | 7.32318      | 0.5884 |
| 11     | 6.489         | VB   | 0.0758      | 18.87074     | 3.80848      | 0.2444 |
| 12     | 6.690         | BB   | 0.0757      | 6.63320      | 1.25443      | 0.0859 |
| 13     | 6.940         | BV   | 0.0848      | 8.05059      | 1.36426      | 0.1042 |
| 14     | 7.073         | VV   | 0.0751      | 5.32454      | 1.01643      | 0.0689 |

Data File C:\CHEM32\1\DATA\HAICHAN NIU\KGP472SAMPLE001.D  
 Sample Name: KGP472sample

| Peak # | RetTime [min] | Type | Width [min] | Area [mAU*s] | Height [mAU] | Area %  |
|--------|---------------|------|-------------|--------------|--------------|---------|
| 15     | 7.187         | VB   | 0.0757      | 6.04263      | 1.14239      | 0.0782  |
| 16     | 7.443         | BV   | 0.1166      | 21.37668     | 2.53029      | 0.2768  |
| 17     | 7.678         | VV   | 0.0736      | 298.55148    | 62.63482     | 3.8659  |
| 18     | 7.838         | VB   | 0.0840      | 9.48736      | 1.53790      | 0.1228  |
| 19     | 8.305         | BV   | 0.0768      | 20.84925     | 4.13497      | 0.2700  |
| 20     | 8.446         | VB   | 0.0781      | 13.63189     | 2.64709      | 0.1765  |
| 21     | 8.624         | BV   | 0.0747      | 21.20205     | 4.36395      | 0.2745  |
| 22     | 8.760         | VB   | 0.0847      | 15.64381     | 2.73620      | 0.2026  |
| 23     | 8.971         | BV   | 0.0940      | 12.98660     | 2.22650      | 0.1682  |
| 24     | 9.069         | VB   | 0.0870      | 17.10794     | 2.89372      | 0.2215  |
| 25     | 9.301         | BV   | 0.0710      | 9.81547      | 2.24416      | 0.1271  |
| 26     | 9.450         | VB   | 0.1128      | 42.31837     | 6.26343      | 0.5480  |
| 27     | 9.725         | BV   | 0.0625      | 7.17496      | 1.80194      | 0.0929  |
| 28     | 9.914         | VV   | 0.0857      | 5990.85889   | 1064.61560   | 77.5740 |
| 29     | 10.271        | VB   | 0.0838      | 9.81505      | 1.79614      | 0.1271  |
| 30     | 10.975        | BV   | 0.1434      | 41.16666     | 4.02217      | 0.5331  |
| 31     | 11.138        | VB   | 0.1752      | 28.90885     | 2.11892      | 0.3743  |
| 32     | 11.541        | BV   | 0.1442      | 58.38725     | 5.48608      | 0.7560  |
| 33     | 11.921        | VB   | 0.1604      | 15.28566     | 1.45678      | 0.1979  |
| 34     | 12.300        | BV   | 0.1220      | 9.04627      | 1.19947      | 0.1171  |
| 35     | 12.739        | BB   | 0.0983      | 14.84690     | 2.27004      | 0.1922  |
| 36     | 13.647        | BB   | 0.1092      | 142.22536    | 19.47558     | 1.8416  |
| 37     | 14.309        | BB   | 0.1597      | 12.45613     | 1.04055      | 0.1613  |
| 38     | 15.660        | BB   | 0.0920      | 13.71918     | 2.42600      | 0.1776  |
| 39     | 15.868        | BV   | 0.0750      | 8.28239      | 1.69400      | 0.1072  |
| 40     | 15.991        | VV   | 0.0912      | 24.20039     | 3.96467      | 0.3134  |
| 41     | 16.133        | VB   | 0.0860      | 8.22338      | 1.45466      | 0.1065  |
| 42     | 16.749        | BB   | 0.1041      | 7.04374      | 1.02647      | 0.0912  |
| 43     | 17.594        | BB   | 0.3381      | 57.08141     | 2.10664      | 0.7391  |
| 44     | 18.089        | BV   | 0.1082      | 159.52197    | 21.58679     | 2.0656  |
| 45     | 18.447        | VB   | 0.1480      | 62.66870     | 5.80069      | 0.8115  |
| 46     | 21.633        | BB   | 0.1406      | 9.47685      | 1.05676      | 0.1227  |
| 47     | 25.105        | BB   | 0.1075      | 7.76048      | 1.13821      | 0.1005  |

Totals : 7722.76234 1281.86374

Signal 4: DAD1 D, Sig=230,16 Ref=off  
 Signal has been modified after loading from rawdata file!

| Peak # | RetTime [min] | Type | Width [min] | Area [mAU*s] | Height [mAU] | Area % |
|--------|---------------|------|-------------|--------------|--------------|--------|
| 1      | 2.823         | BB   | 0.0705      | 8.73210      | 1.93966      | 0.1941 |
| 2      | 3.904         | BV   | 0.6768      | 248.98193    | 4.43586      | 5.5347 |
| 3      | 4.487         | VV   | 0.1522      | 61.88265     | 5.30089      | 1.3756 |
| 4      | 4.787         | VV   | 0.3186      | 111.43323    | 4.59977      | 2.4771 |
| 5      | 5.224         | VV   | 0.1754      | 39.09641     | 2.82544      | 0.8691 |
| 6      | 5.508         | VB   | 0.1585      | 23.49368     | 1.92330      | 0.5222 |

Data File C:\CHEM32\1\DATA\HAICHAN NIU\KGP472SAMPLE001.D  
 Sample Name: KGP472sample

| Peak # | RetTime [min] | Type | Width [min] | Area [mAU*s] | Height [mAU] | Area %  |
|--------|---------------|------|-------------|--------------|--------------|---------|
| 7      | 6.273         | BV   | 0.0749      | 16.03098     | 3.06964      | 0.3564  |
| 8      | 7.079         | VB   | 0.1190      | 11.69650     | 1.29917      | 0.2600  |
| 9      | 7.678         | VV   | 0.0734      | 162.24304    | 34.16079     | 3.6065  |
| 10     | 7.840         | VB   | 0.0797      | 11.34244     | 2.01415      | 0.2521  |
| 11     | 8.304         | BV   | 0.0761      | 7.69742      | 1.54601      | 0.1711  |
| 12     | 8.448         | VB   | 0.0728      | 11.99849     | 2.55425      | 0.2667  |
| 13     | 8.623         | BV   | 0.0733      | 7.45083      | 1.57185      | 0.1656  |
| 14     | 8.763         | VB   | 0.0939      | 6.07437      | 1.04311      | 0.1350  |
| 15     | 8.980         | BV   | 0.0860      | 5.26994      | 1.02468      | 0.1171  |
| 16     | 9.070         | VB   | 0.0904      | 9.96891      | 1.60540      | 0.2216  |
| 17     | 9.447         | BB   | 0.1139      | 13.49196     | 2.01943      | 0.2999  |
| 18     | 9.915         | VV   | 0.0840      | 3529.10742   | 643.14319    | 78.4491 |
| 19     | 10.272        | VB   | 0.1578      | 21.52843     | 1.82222      | 0.4786  |
| 20     | 10.979        | BB   | 0.0865      | 8.80346      | 1.59313      | 0.1957  |
| 21     | 11.543        | BB   | 0.1176      | 22.38876     | 2.73258      | 0.4977  |
| 22     | 13.647        | BB   | 0.1523      | 61.38229     | 5.58113      | 1.3645  |
| 23     | 15.992        | BV   | 0.1239      | 8.95901      | 1.00621      | 0.1992  |
| 24     | 18.089        | BV   | 0.1070      | 61.69706     | 8.46725      | 1.3715  |
| 25     | 18.447        | VB   | 0.1340      | 27.84542     | 2.90000      | 0.6190  |

Totals : 4498.59674 740.17910

Signal 5: DAD1 E, Sig=280,16 Ref=off  
 Signal has been modified after loading from rawdata file!

| Peak # | RetTime [min] | Type | Width [min] | Area [mAU*s] | Height [mAU] | Area %  |
|--------|---------------|------|-------------|--------------|--------------|---------|
| 1      | 4.487         | BB   | 0.0762      | 5.84106      | 1.13265      | 0.3481  |
| 2      | 7.678         | BB   | 0.0727      | 141.08772    | 30.06461     | 8.4077  |
| 3      | 9.077         | BB   | 0.0935      | 6.99596      | 1.11009      | 0.4169  |
| 4      | 9.450         | BB   | 0.1138      | 7.17926      | 1.02409      | 0.4278  |
| 5      | 9.915         | BV   | 0.0830      | 1472.46619   | 272.47473    | 87.7469 |
| 6      | 13.647        | BB   | 0.2469      | 26.35899     | 1.37962      | 1.5708  |
| 7      | 18.088        | BB   | 0.1113      | 9.28397      | 1.18590      | 0.5532  |
| 8      | 18.444        | BB   | 0.1216      | 8.87055      | 1.03903      | 0.5286  |

Totals : 1678.08371 309.41074

Signal 6: DAD1 F, Sig=280,16 Ref=off  
 Signal has been modified after loading from rawdata file!

Data File C:\CHEM32\1\DATA\HAICHAN NIU\KGP472SAMPLE001.D  
 Sample Name: KGP472sample

| Peak #   | RetTime [min] | Type | Width [min] | Area [mAU*s] | Height [mAU] | Area %  |
|----------|---------------|------|-------------|--------------|--------------|---------|
| 1        | 4.487         | BB   | 0.0762      | 5.83992      | 1.13265      | 0.3480  |
| 2        | 7.678         | BB   | 0.0728      | 141.09488    | 30.06471     | 8.4080  |
| 3        | 9.077         | BB   | 0.0935      | 6.99577      | 1.11009      | 0.4169  |
| 4        | 9.450         | BB   | 0.1138      | 7.17983      | 1.02459      | 0.4279  |
| 5        | 9.915         | BV   | 0.0830      | 1472.46594   | 272.47427    | 87.7463 |
| 6        | 13.647        | BB   | 0.2468      | 26.36662     | 1.38079      | 1.5712  |
| 7        | 18.088        | BB   | 0.1113      | 9.28435      | 1.18593      | 0.5533  |
| 8        | 18.444        | BB   | 0.1216      | 8.86765      | 1.03896      | 0.5284  |
| Totals : |               |      |             | 1678.09496   | 309.41201    |         |

Signal 7: DAD1 G, Sig=300,16 Ref=off  
 Signal has been modified after loading from rawdata file!

| Peak #   | RetTime [min] | Type | Width [min] | Area [mAU*s] | Height [mAU] | Area %  |
|----------|---------------|------|-------------|--------------|--------------|---------|
| 1        | 0.946         | BB   | 0.1929      | 41.73813     | 2.75312      | 3.3407  |
| 2        | 1.207         | BV   | 0.1318      | 62.59555     | 6.77686      | 5.0101  |
| 3        | 1.338         | VB   | 0.1402      | 46.74639     | 4.77595      | 3.7415  |
| 4        | 1.838         | BV   | 0.2338      | 21.82882     | 1.16929      | 1.7472  |
| 5        | 1.941         | VB   | 0.1033      | 11.75556     | 1.53634      | 0.9409  |
| 6        | 7.678         | BB   | 0.0724      | 95.35380     | 20.46690     | 7.6320  |
| 7        | 9.915         | BV   | 0.0828      | 769.89136    | 143.04012    | 61.6211 |
| 8        | 27.464        | BB   | 0.0480      | 76.92471     | 24.95676     | 6.1570  |
| 9        | 28.162        | BB   | 0.1328      | 122.56091    | 12.45418     | 9.8096  |
| Totals : |               |      |             | 1249.39522   | 217.92952    |         |

Signal 8: DAD1 H, Sig=320,16 Ref=off  
 Signal has been modified after loading from rawdata file!

| Peak #   | RetTime [min] | Type | Width [min] | Area [mAU*s] | Height [mAU] | Area %  |
|----------|---------------|------|-------------|--------------|--------------|---------|
| 1        | 1.207         | BV   | 0.1307      | 52.14275     | 5.59459      | 12.0450 |
| 2        | 1.337         | VB   | 0.1374      | 37.02372     | 3.81054      | 8.5525  |
| 3        | 1.836         | BV   | 0.2130      | 20.42301     | 1.20949      | 4.7177  |
| 4        | 1.941         | VB   | 0.2092      | 28.18526     | 1.68497      | 6.5108  |
| 5        | 7.678         | BB   | 0.0718      | 41.36581     | 8.97630      | 9.5555  |
| 6        | 9.915         | BB   | 0.0830      | 82.23476     | 15.23933     | 18.9963 |
| 7        | 27.461        | BB   | 0.0559      | 74.66927     | 20.81409     | 17.2487 |
| 8        | 28.162        | BB   | 0.1387      | 96.85426     | 9.36135      | 22.3734 |
| Totals : |               |      |             | 432.89884    | 66.69066     |         |



Data File C:\CHEM32\1\DATA\HAICHAN NIU\KGP472SAMPLE001.D  
Sample Name: KGP472sample

=====  
\*\*\* End of Report \*\*\*

52. ethyl 5-(2,3-dimethoxyphenyl)-3-oxopentanoate

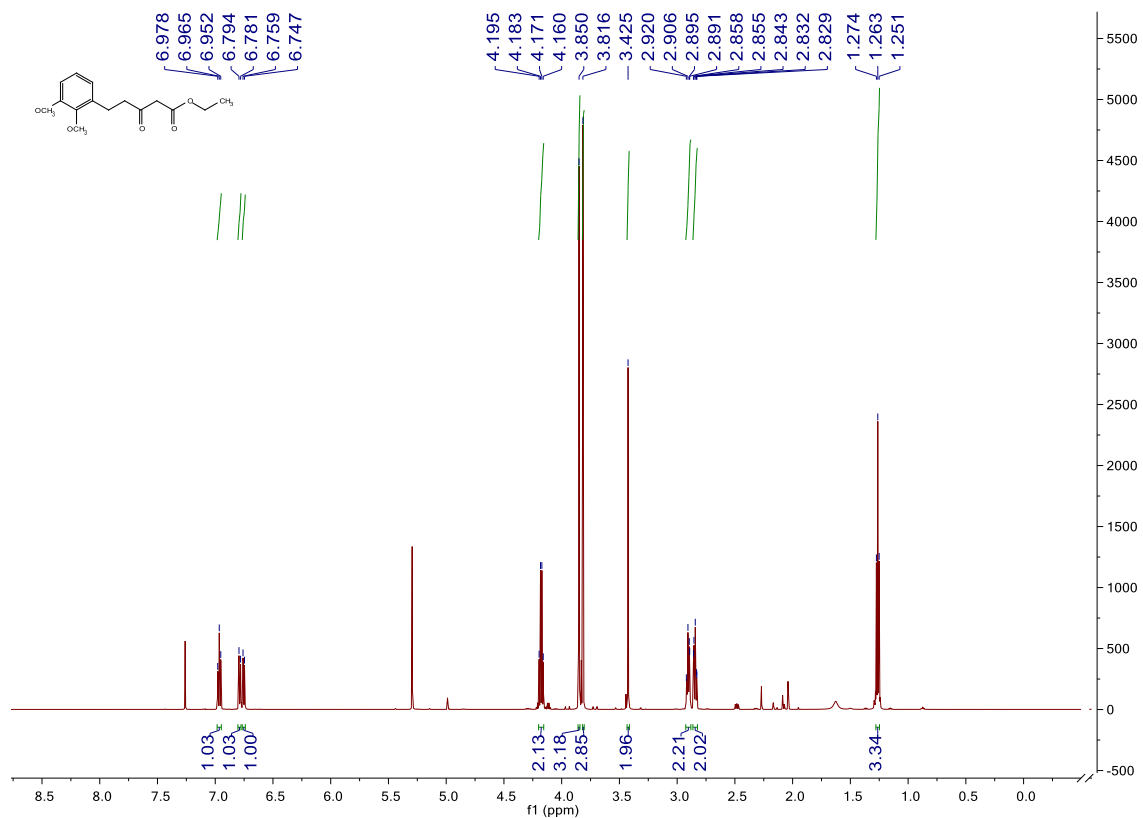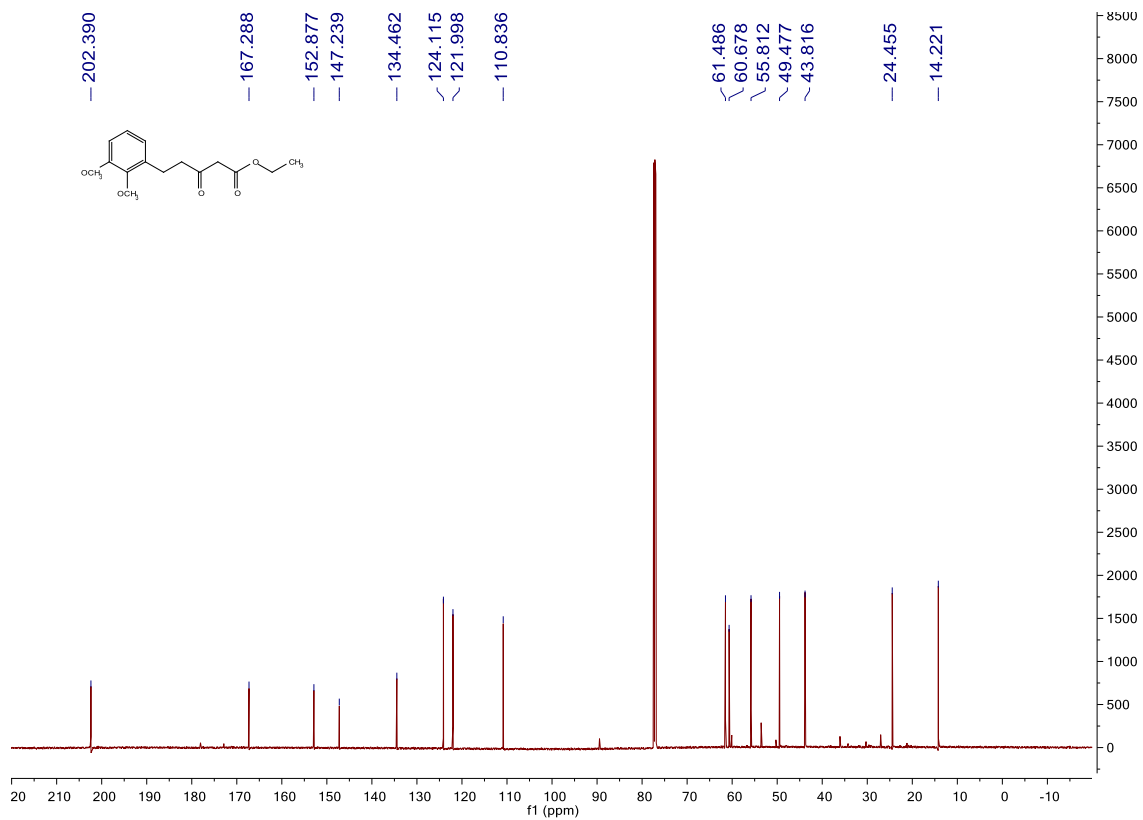

53. ethyl 5-(2,3-dimethoxyphenyl)-3-hydroxypentanoate

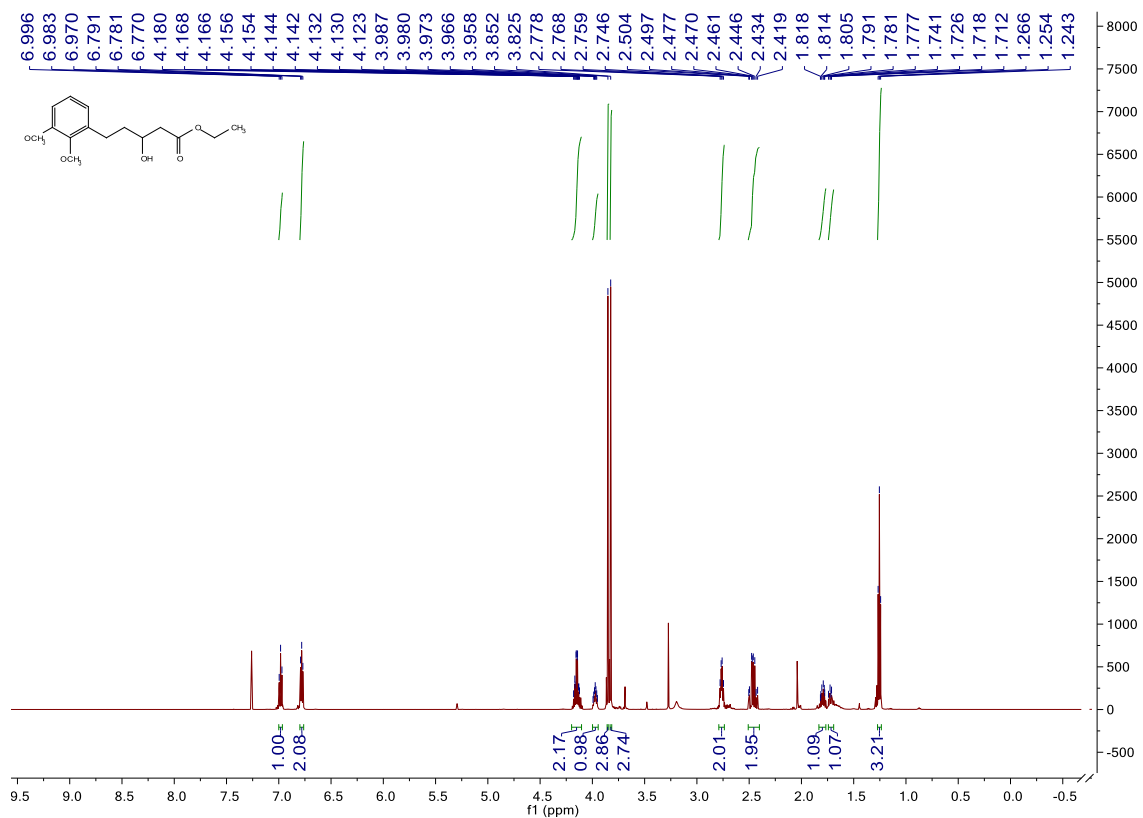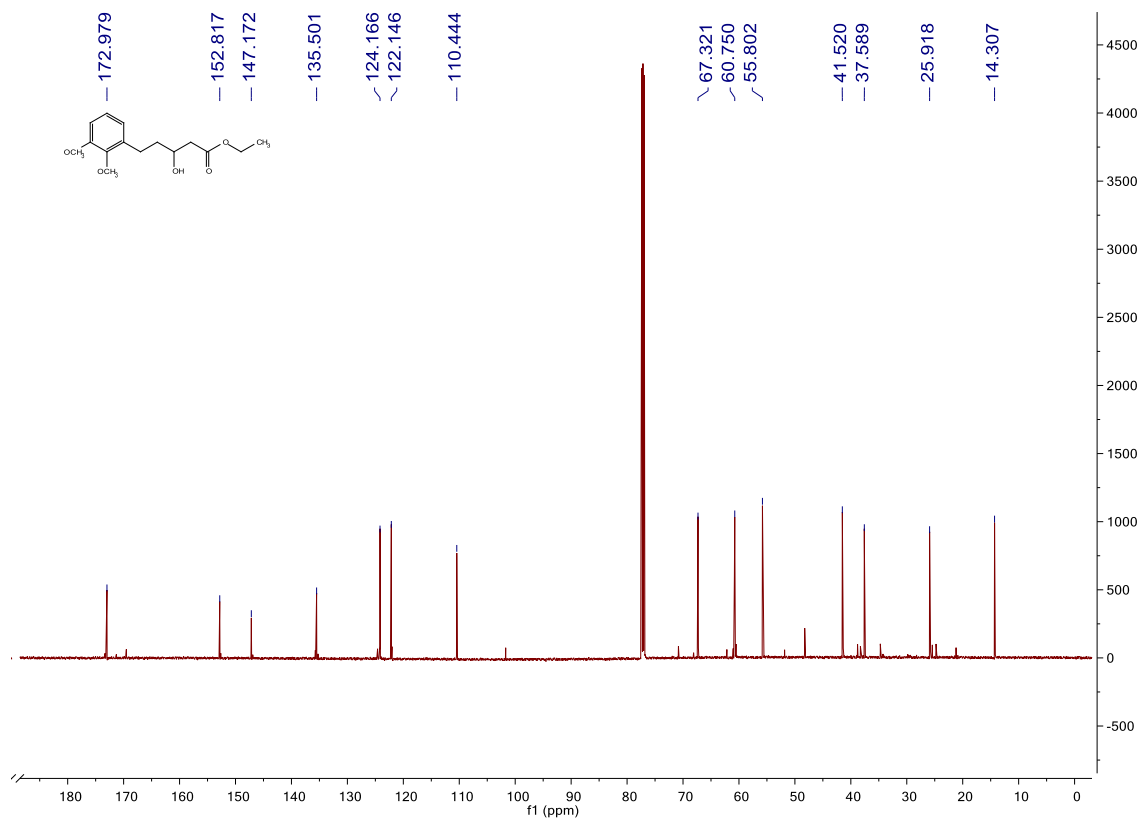

54. 5-(2,3-dimethoxyphenyl)-3-hydroxypentanoic acid

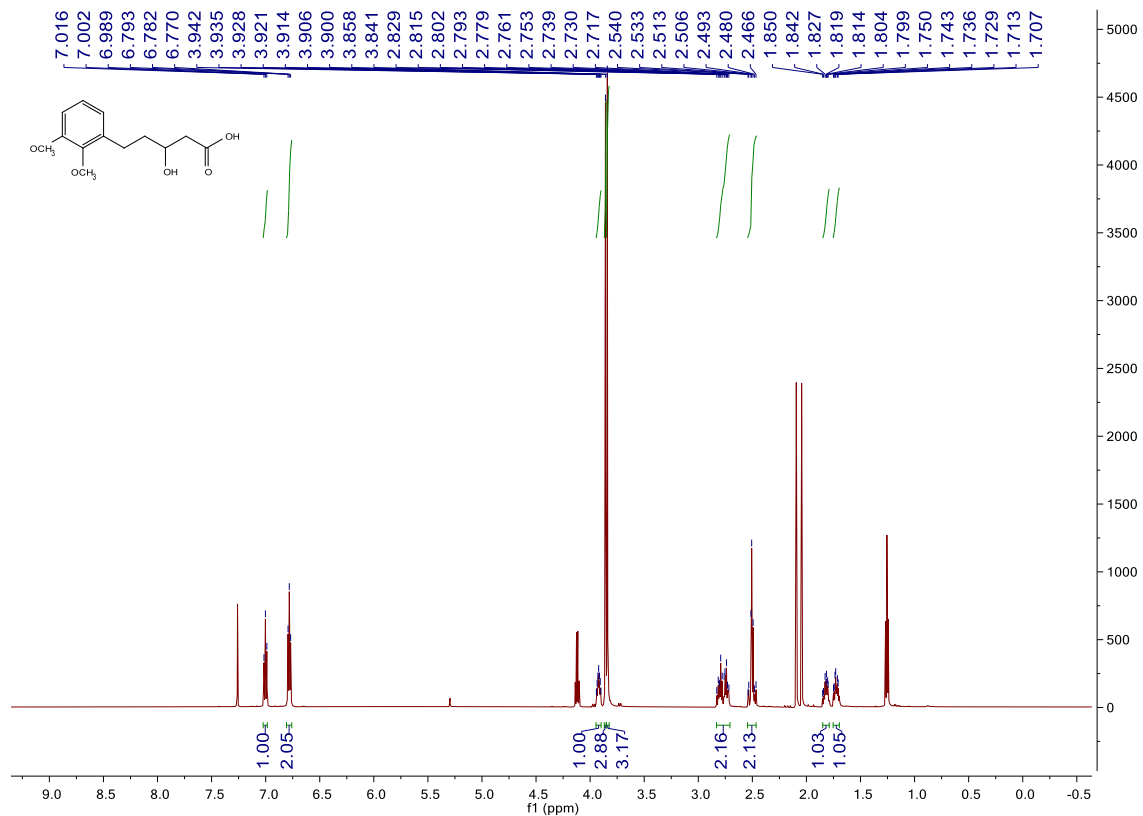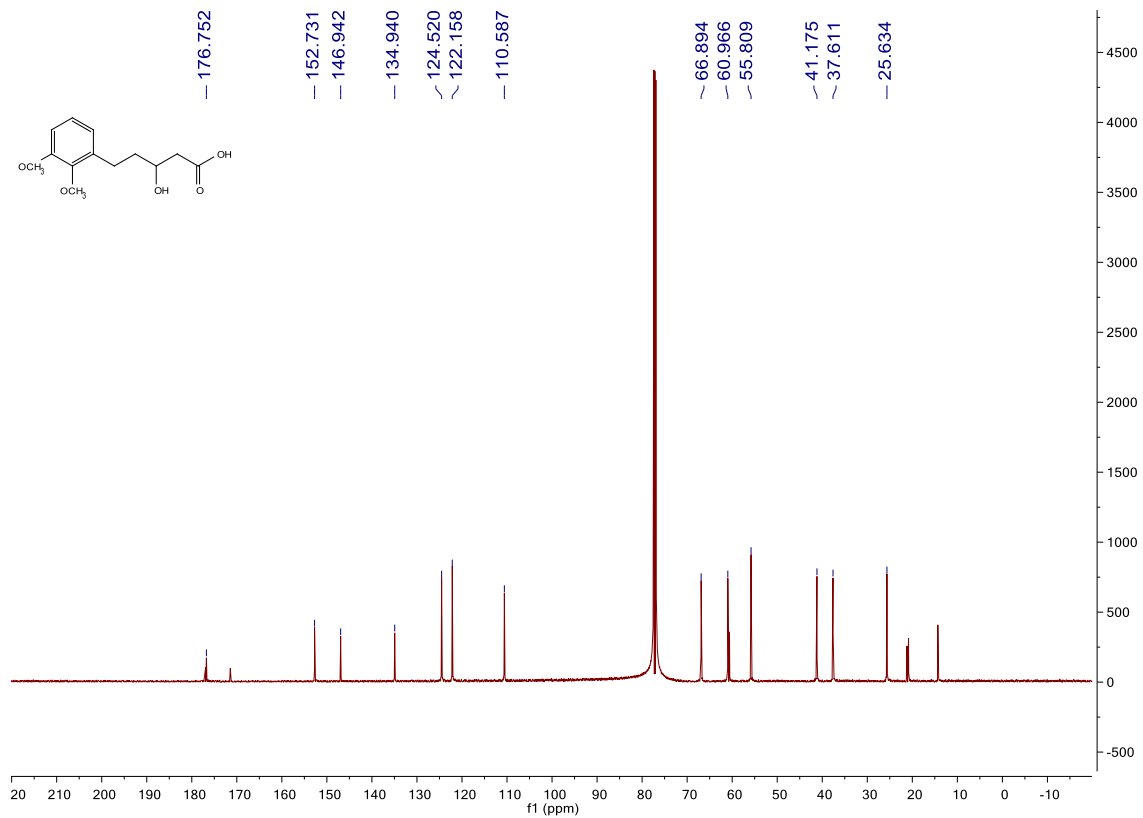

55. 1,2-dimethoxy-8,9-dihydro-5H-benzo[7]annulen-5-one

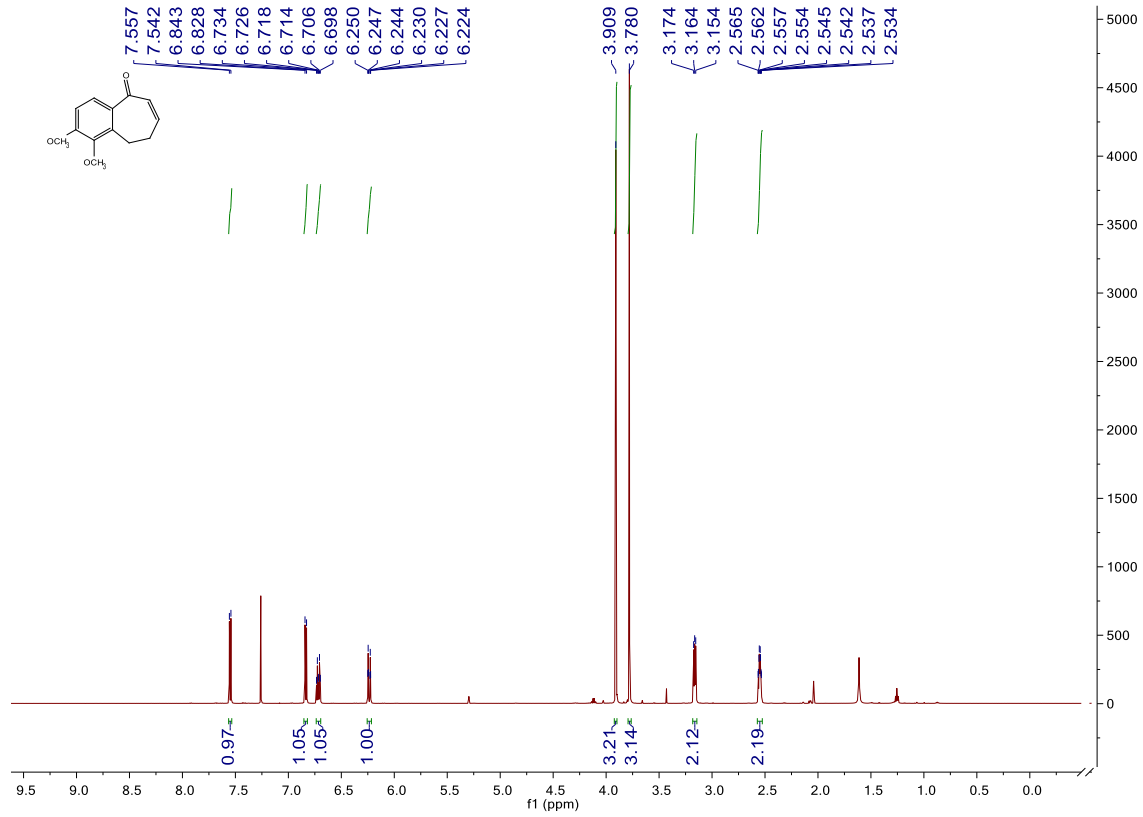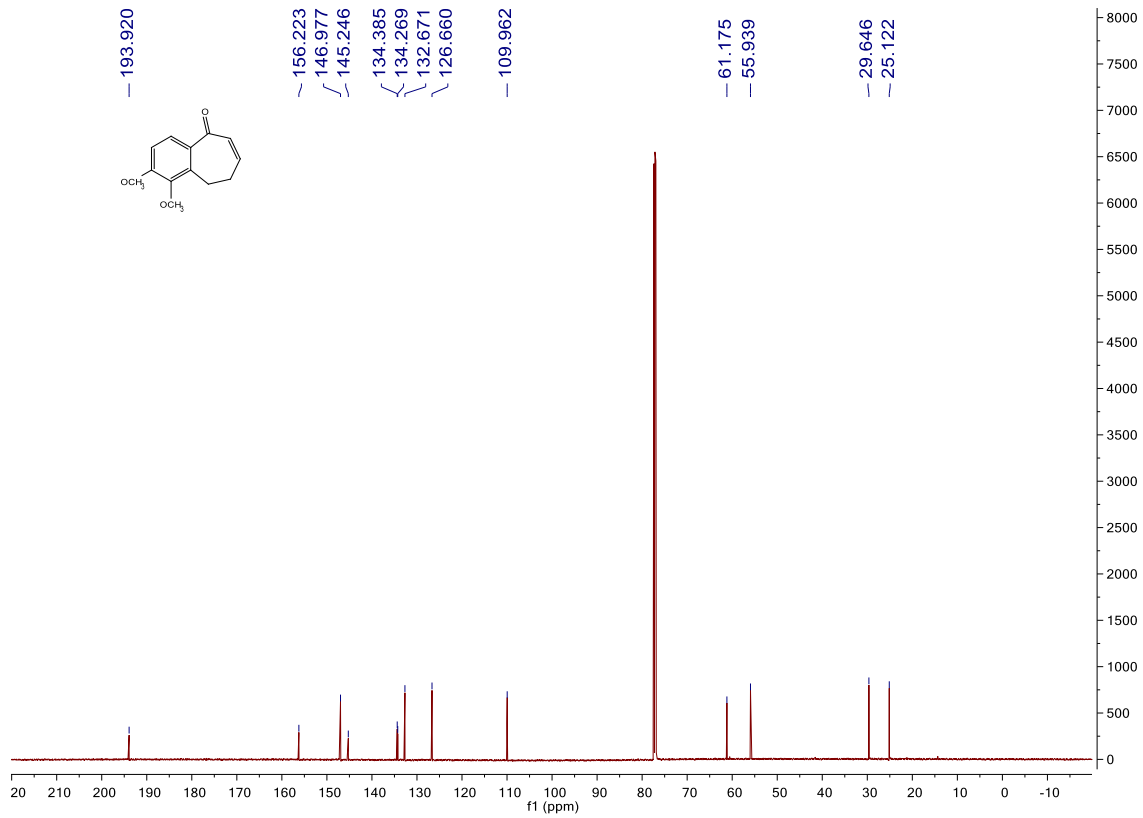

56. 1,2-dimethoxy-5-(3,4,5-trimethoxyphenyl)-8,9-dihydro-5H-benzo[7]annulen-5-ol

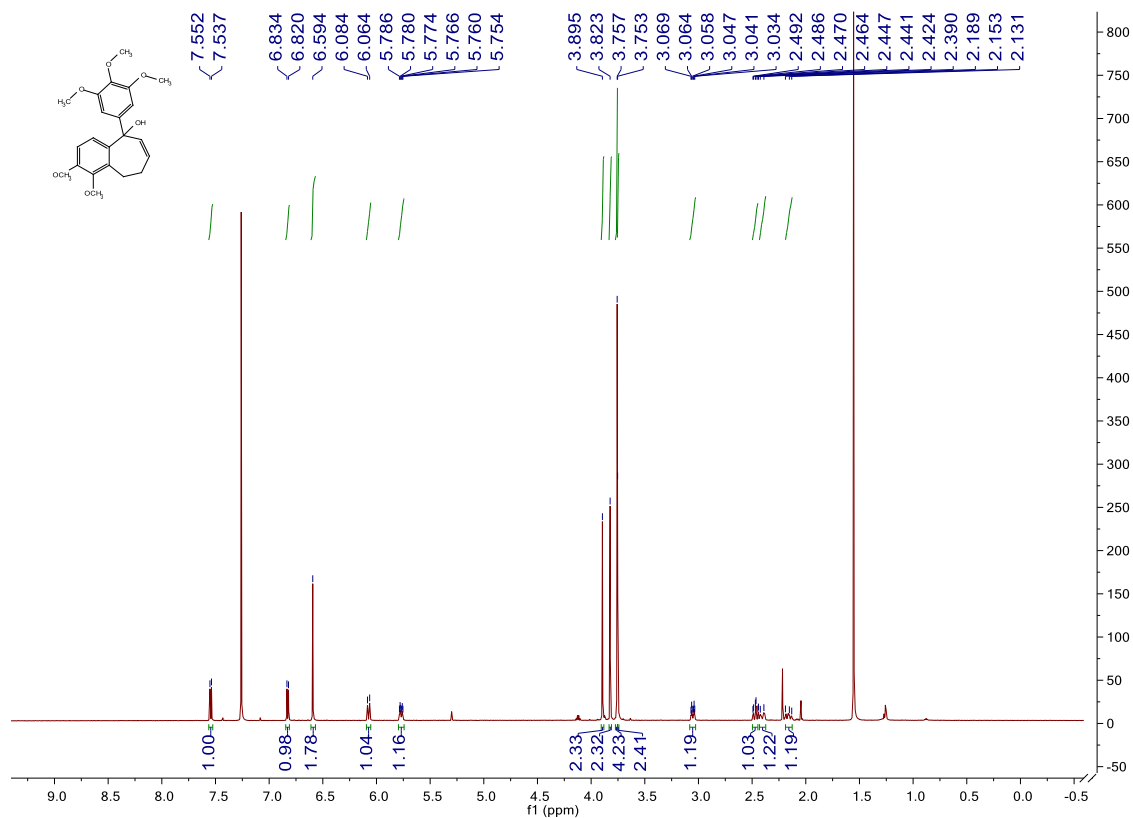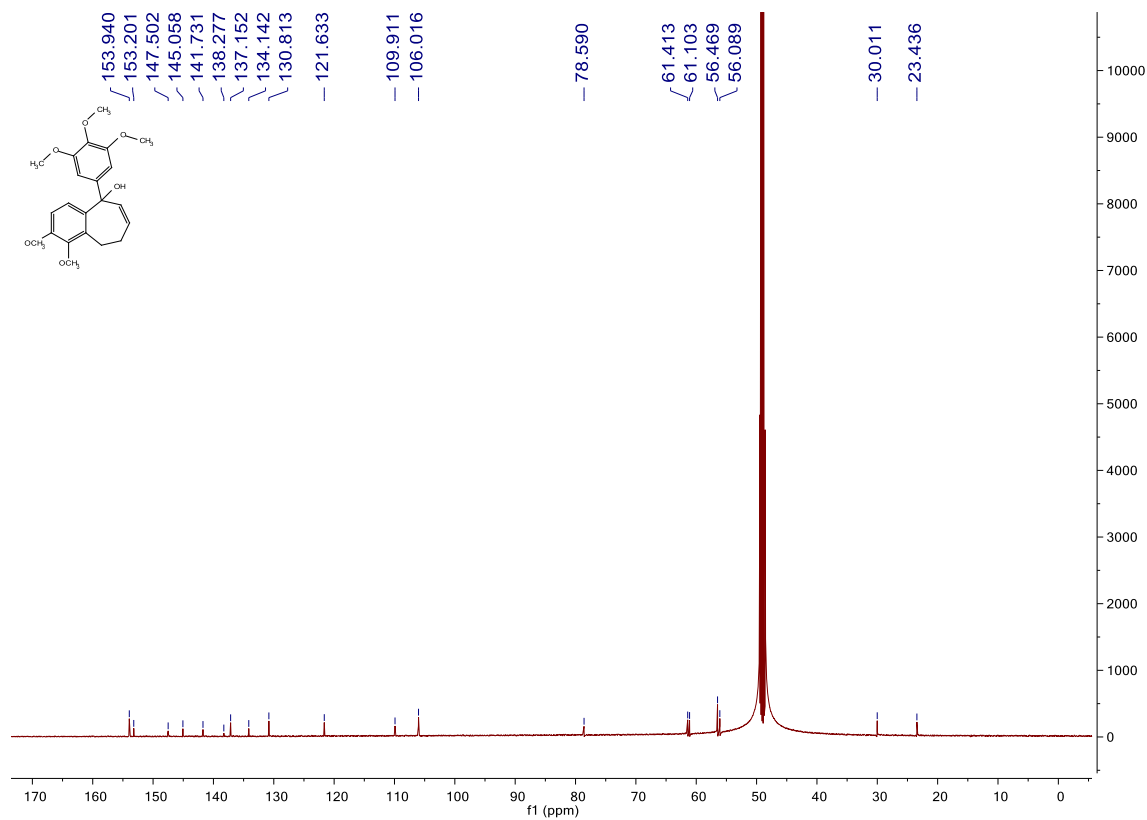

NHC\_3\_154\_KGP500 #2-19 RT: 0.01-0.16 AV: 18 NL: 7.08E6  
T: FTMS + c ESI Full ms [200.00-1000.00]

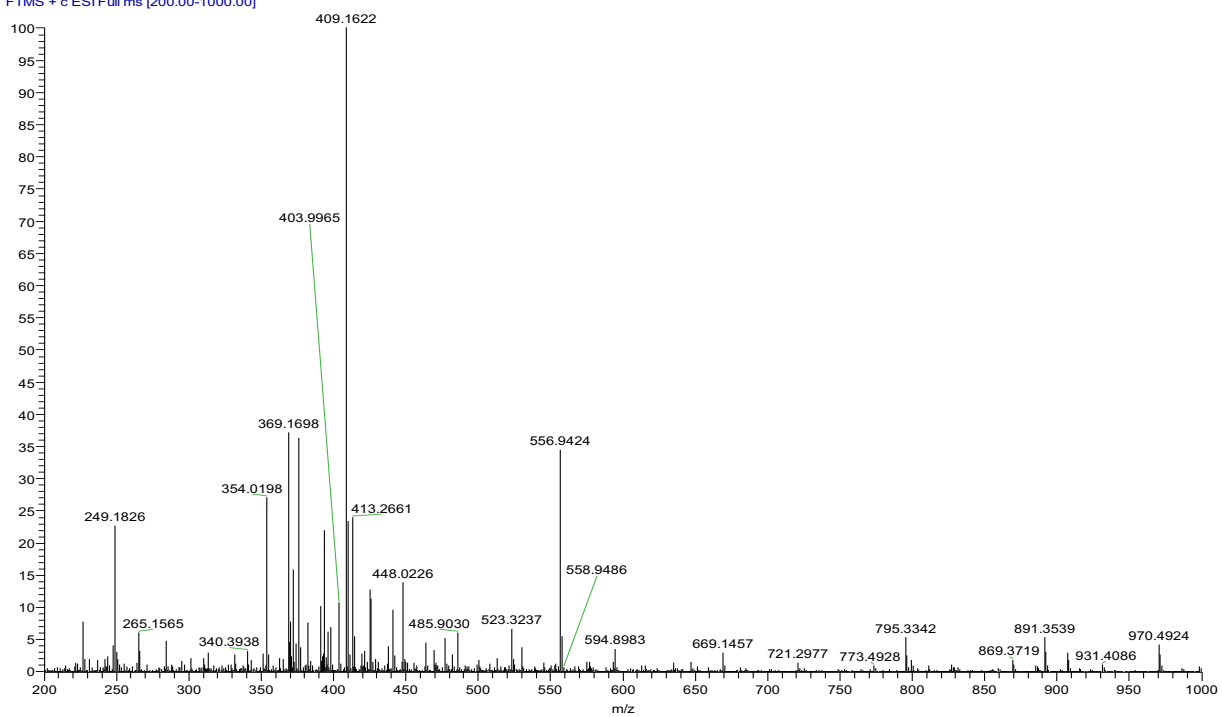

Data File C:\Chem32\1\Data\NHC\NHC\_3\_154\_KGP500\_20170203.D  
Sample Name: NHC\_3\_154\_KGP500\_20170203

=====  
Acq. Operator : SYSTEM  
Sample Operator : SYSTEM  
Acq. Instrument : 1200 HPLC Location : 1  
Injection Date : 2/3/2017 8:34:01 AM  
Inj Volume : No inj  
Acq. Method : C:\Chem32\1\Methods\MASTERMETHOD2.M  
Last changed : 12/2/2015 12:37:42 PM by Eric Lin  
Analysis Method : C:\CHEM32\1\METHODS\RT-ACNWASH 2.M  
Last changed : 2/3/2017 9:24:08 AM by SYSTEM  
(modified after loading)  
Method Info : General Column Wash Method  
Sample Info : KGP500

Additional Info : Peak(s) manually integrated

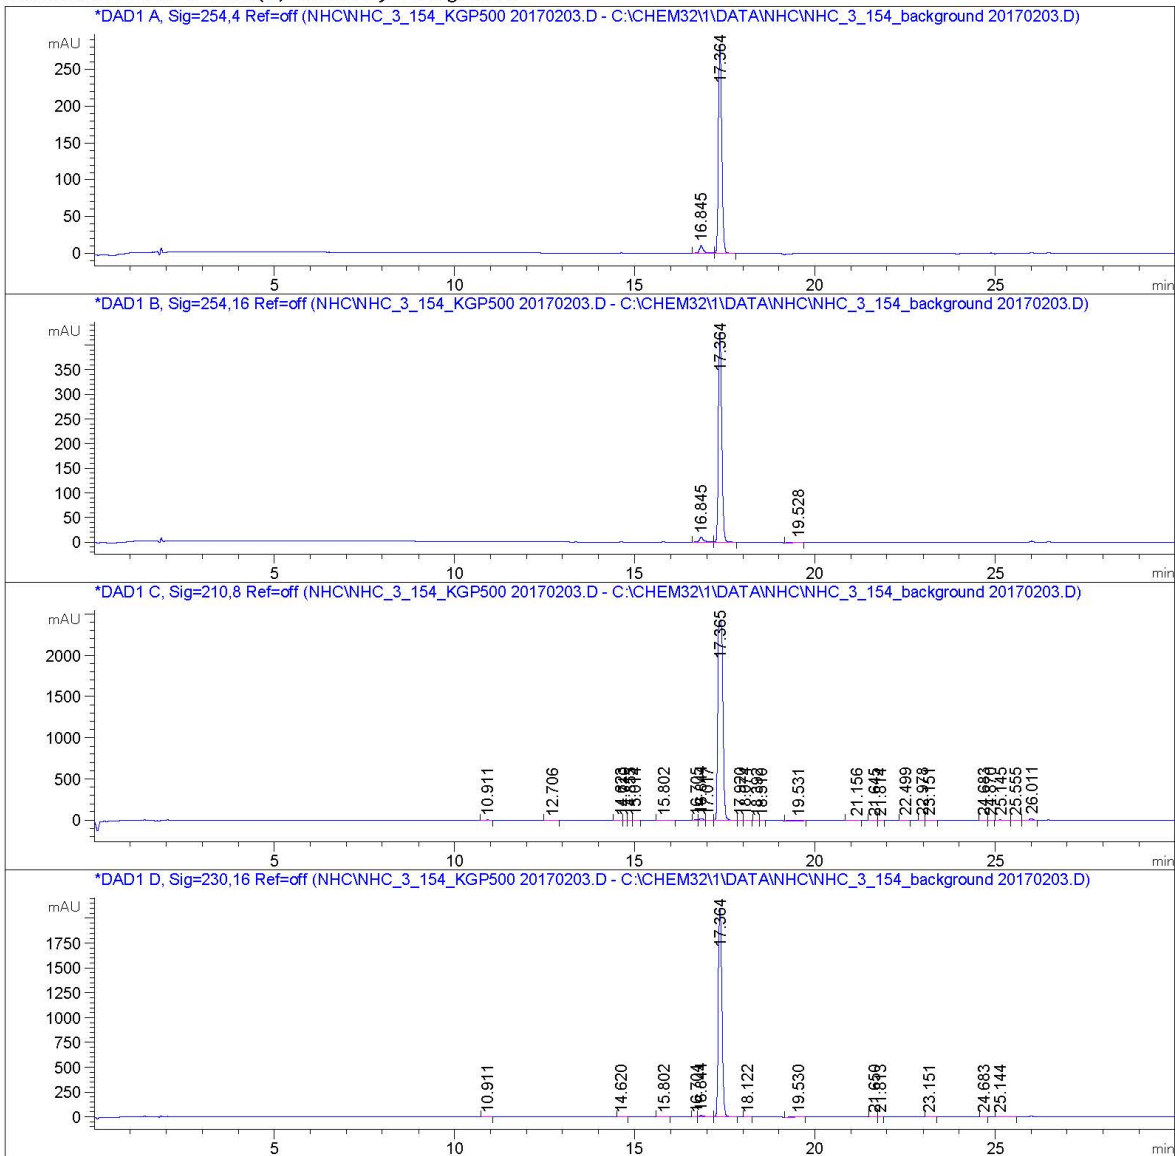



Data File C:\Chem32\1\Data\NHC\NHC\_3\_154\_KGP500\_20170203.D  
Sample Name: NHC\_3\_154\_KGP500\_20170203

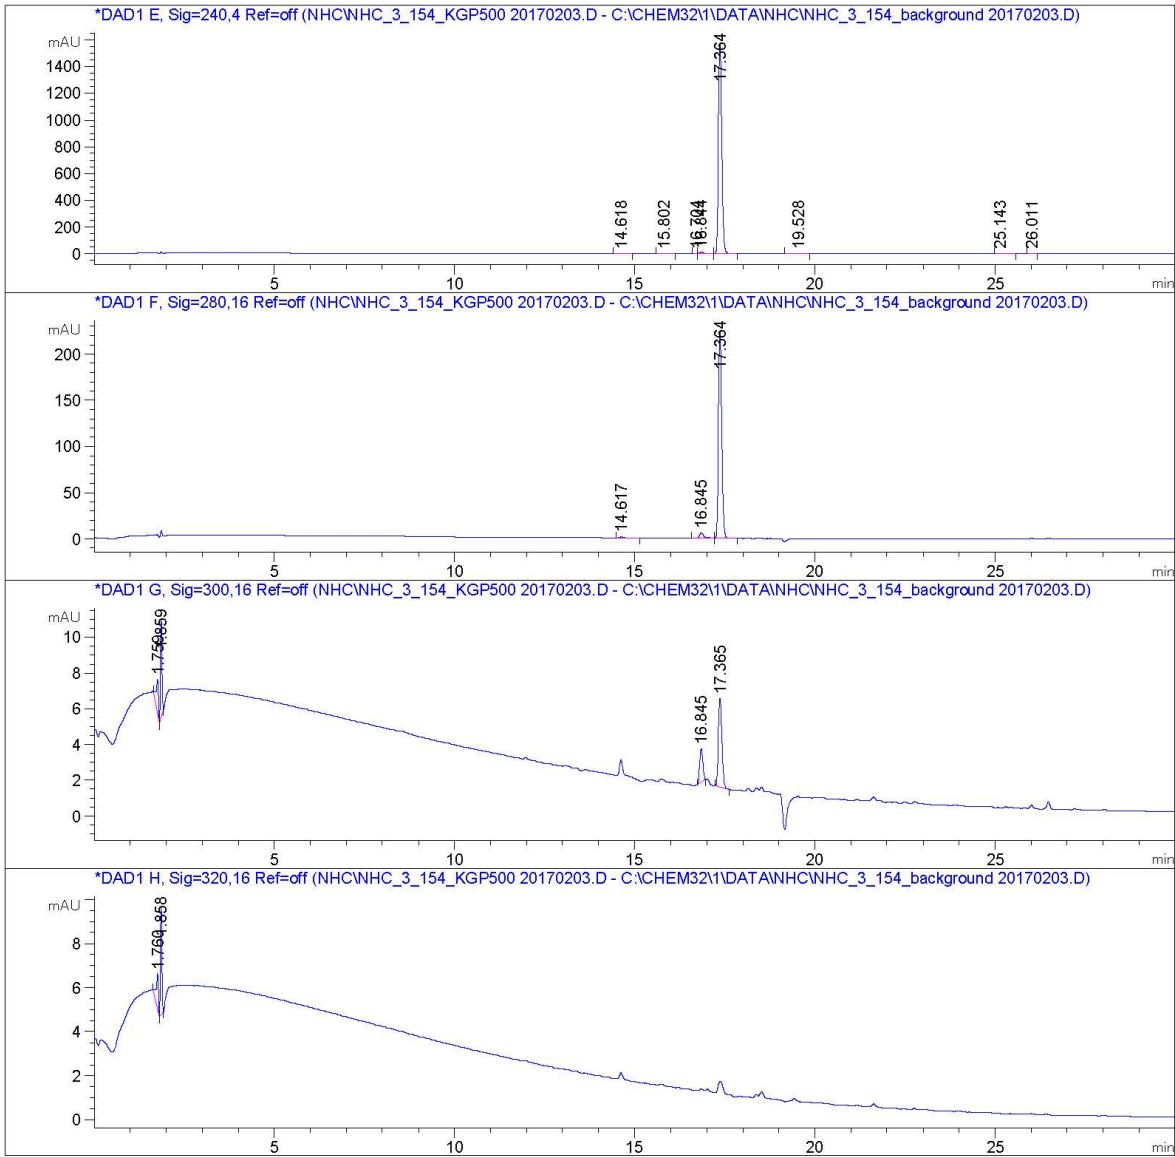

=====  
Area Percent Report  
=====

Sorted By : Signal  
Multiplier : 1.0000  
Dilution : 1.0000  
Do not use Multiplier & Dilution Factor with ISTDs

Data File C:\Chem32\1\Data\NHC\NHC\_3\_154\_KGP500\_20170203.D  
Sample Name: NHC\_3\_154\_KGP500\_20170203

Signal 1: DAD1 A, Sig=254,4 Ref=off  
Signal has been modified after loading from rawdata file!

| Peak # | RetTime [min] | Type | Width [min] | Area [mAU*s] | Height [mAU] | Area %  |
|--------|---------------|------|-------------|--------------|--------------|---------|
| 1      | 16.845        | BV   | 0.1217      | 85.85909     | 10.47208     | 4.4690  |
| 2      | 17.364        | VB   | 0.1016      | 1835.37573   | 283.17236    | 95.5310 |

Totals : 1921.23482 293.64444

Signal 2: DAD1 B, Sig=254,16 Ref=off  
Signal has been modified after loading from rawdata file!

| Peak # | RetTime [min] | Type | Width [min] | Area [mAU*s] | Height [mAU] | Area %  |
|--------|---------------|------|-------------|--------------|--------------|---------|
| 1      | 16.845        | BV   | 0.1226      | 81.98203     | 9.89646      | 2.8747  |
| 2      | 17.364        | VB   | 0.1015      | 2747.77808   | 424.72995    | 96.3504 |
| 3      | 19.528        | BB   | 0.2779      | 22.10064     | 1.01566      | 0.7750  |

Totals : 2851.86075 435.64207

Signal 3: DAD1 C, Sig=210,8 Ref=off  
Signal has been modified after loading from rawdata file!

| Peak # | RetTime [min] | Type | Width [min] | Area [mAU*s] | Height [mAU] | Area %  |
|--------|---------------|------|-------------|--------------|--------------|---------|
| 1      | 10.911        | BB   | 0.1149      | 57.66664     | 7.56772      | 0.2360  |
| 2      | 12.706        | BB   | 0.1147      | 8.27689      | 1.08912      | 0.0339  |
| 3      | 14.623        | BV   | 0.0910      | 13.19409     | 2.16835      | 0.0540  |
| 4      | 14.710        | VV   | 0.0904      | 13.25748     | 2.13539      | 0.0543  |
| 5      | 14.855        | VV   | 0.0994      | 10.74688     | 1.62052      | 0.0440  |
| 6      | 15.014        | VB   | 0.1058      | 16.50654     | 2.35352      | 0.0675  |
| 7      | 15.802        | BB   | 0.1072      | 37.58694     | 5.26771      | 0.1538  |
| 8      | 16.705        | BV   | 0.0855      | 49.76601     | 9.14854      | 0.2037  |
| 9      | 16.844        | VV   | 0.1047      | 146.81279    | 21.76399     | 0.6008  |
| 10     | 17.017        | VB   | 0.0986      | 21.63904     | 3.29418      | 0.0886  |
| 11     | 17.365        | BV   | 0.1597      | 2.36245e4    | 2423.54004   | 96.6755 |
| 12     | 17.920        | VV   | 0.1140      | 31.22889     | 4.05004      | 0.1278  |
| 13     | 18.074        | VB   | 0.1307      | 29.21334     | 3.52332      | 0.1195  |
| 14     | 18.392        | BV   | 0.0984      | 9.68995      | 1.51892      | 0.0397  |
| 15     | 18.510        | VB   | 0.0864      | 5.96369      | 1.08057      | 0.0244  |
| 16     | 19.531        | BB   | 0.2901      | 50.02998     | 2.21045      | 0.2047  |
| 17     | 21.156        | BB   | 0.1203      | 11.18060     | 1.47691      | 0.0458  |
| 18     | 21.645        | BV   | 0.1201      | 9.27212      | 1.22721      | 0.0379  |
| 19     | 21.814        | VB   | 0.0914      | 5.95397      | 1.03069      | 0.0244  |
| 20     | 22.499        | BB   | 0.1159      | 10.01805     | 1.33036      | 0.0410  |
| 21     | 22.978        | VV   | 0.0924      | 6.67292      | 1.10559      | 0.0273  |
| 22     | 23.151        | VB   | 0.1100      | 31.31748     | 4.35191      | 0.1282  |
| 23     | 24.683        | VV   | 0.1119      | 37.72108     | 5.24394      | 0.1544  |

Data File C:\Chem32\1\Data\NHC\NHC\_3\_154\_KGP500\_20170203.D  
Sample Name: NHC\_3\_154\_KGP500\_20170203

| Peak # | RetTime [min] | Type | Width [min] | Area [mAU*s] | Height [mAU] | Area % |
|--------|---------------|------|-------------|--------------|--------------|--------|
| 24     | 24.870        | VB   | 0.1046      | 9.98686      | 1.48269      | 0.0409 |
| 25     | 25.145        | BV   | 0.1252      | 48.47191     | 5.70342      | 0.1984 |
| 26     | 25.555        | VV   | 0.1134      | 20.82845     | 2.84694      | 0.0852 |
| 27     | 26.011        | VB   | 0.1010      | 119.40503    | 18.57635     | 0.4886 |

Totals : 2.44369e4 2536.70837

Signal 4: DAD1 D, Sig=230,16 Ref=off  
Signal has been modified after loading from rawdata file!

| Peak # | RetTime [min] | Type | Width [min] | Area [mAU*s] | Height [mAU] | Area %  |
|--------|---------------|------|-------------|--------------|--------------|---------|
| 1      | 10.911        | BB   | 0.1121      | 13.09853     | 1.73546      | 0.0878  |
| 2      | 14.620        | BB   | 0.1186      | 13.36771     | 1.61384      | 0.0896  |
| 3      | 15.802        | BB   | 0.1057      | 12.76321     | 1.86743      | 0.0856  |
| 4      | 16.704        | BV   | 0.0805      | 16.05019     | 3.09411      | 0.1076  |
| 5      | 16.844        | VV   | 0.1198      | 117.29995    | 14.59164     | 0.7863  |
| 6      | 17.364        | VB   | 0.1113      | 1.46344e4    | 2100.98071   | 98.1036 |
| 7      | 18.122        | VB   | 0.1431      | 8.70244      | 1.02423      | 0.0583  |
| 8      | 19.530        | BB   | 0.3048      | 51.65467     | 2.16144      | 0.3463  |
| 9      | 21.650        | BV   | 0.1101      | 8.40199      | 1.16571      | 0.0563  |
| 10     | 21.813        | VB   | 0.0888      | 6.30786      | 1.13566      | 0.0423  |
| 11     | 23.151        | VB   | 0.1063      | 8.41046      | 1.22168      | 0.0564  |
| 12     | 24.683        | BV   | 0.1116      | 10.55525     | 1.47300      | 0.0708  |
| 13     | 25.144        | BB   | 0.1348      | 16.27417     | 1.74585      | 0.1091  |

Totals : 1.49173e4 2133.81077

Signal 5: DAD1 E, Sig=240,4 Ref=off  
Signal has been modified after loading from rawdata file!

| Peak # | RetTime [min] | Type | Width [min] | Area [mAU*s] | Height [mAU] | Area %  |
|--------|---------------|------|-------------|--------------|--------------|---------|
| 1      | 14.618        | BB   | 0.1181      | 8.61762      | 1.06867      | 0.0825  |
| 2      | 15.802        | BB   | 0.1116      | 8.87661      | 1.18186      | 0.0850  |
| 3      | 16.704        | BV   | 0.0800      | 10.13652     | 1.97227      | 0.0971  |
| 4      | 16.844        | VV   | 0.1203      | 76.82481     | 9.50258      | 0.7358  |
| 5      | 17.364        | VB   | 0.1022      | 1.02631e4    | 1572.32544   | 98.3015 |
| 6      | 19.528        | BB   | 0.3100      | 40.08093     | 1.64677      | 0.3839  |
| 7      | 25.143        | BB   | 0.1399      | 10.35311     | 1.04220      | 0.0992  |
| 8      | 26.011        | BB   | 0.0972      | 22.43824     | 3.67601      | 0.2149  |

Totals : 1.04404e4 1592.41580

Data File C:\Chem32\1\Data\NHC\NHC\_3\_154\_KGP500\_20170203.D  
Sample Name: NHC\_3\_154\_KGP500\_20170203

Signal 6: DAD1 F, Sig=280,16 Ref=off  
Signal has been modified after loading from rawdata file!

| Peak # | RetTime [min] | Type | Width [min] | Area [mAU*s] | Height [mAU] | Area %  |
|--------|---------------|------|-------------|--------------|--------------|---------|
| 1      | 14.617        | BB   | 0.1221      | 12.44602     | 1.47997      | 0.8296  |
| 2      | 16.845        | BV   | 0.1243      | 52.75229     | 6.26000      | 3.5163  |
| 3      | 17.364        | VB   | 0.1006      | 1435.04431   | 224.35574    | 95.6541 |

Totals :                    1500.24263   232.09571

Signal 7: DAD1 G, Sig=300,16 Ref=off  
Signal has been modified after loading from rawdata file!

| Peak # | RetTime [min] | Type | Width [min] | Area [mAU*s] | Height [mAU] | Area %  |
|--------|---------------|------|-------------|--------------|--------------|---------|
| 1      | 1.759         | BB   | 0.0609      | 7.55375      | 1.87956      | 10.9323 |
| 2      | 1.859         | BB   | 0.0462      | 16.25813     | 5.54189      | 23.5298 |
| 3      | 16.845        | BB   | 0.0948      | 11.18299     | 1.89581      | 16.1848 |
| 4      | 17.365        | BB   | 0.1082      | 34.10091     | 4.96056      | 49.3531 |

Totals :                    69.09579   14.27782

Signal 8: DAD1 H, Sig=320,16 Ref=off  
Signal has been modified after loading from rawdata file!

| Peak # | RetTime [min] | Type | Width [min] | Area [mAU*s] | Height [mAU] | Area %  |
|--------|---------------|------|-------------|--------------|--------------|---------|
| 1      | 1.760         | BB   | 0.0613      | 6.44649      | 1.58956      | 31.1500 |
| 2      | 1.858         | BB   | 0.0457      | 14.24850     | 4.92747      | 68.8500 |

Totals :                    20.69498   6.51703

=====  
\*\*\* End of Report \*\*\*

57. 1,2-dimethoxy-7-(3,4,5-trimethoxyphenyl)-6,7,8,9-tetrahydro-5H-benzo[7]annulen-5-one

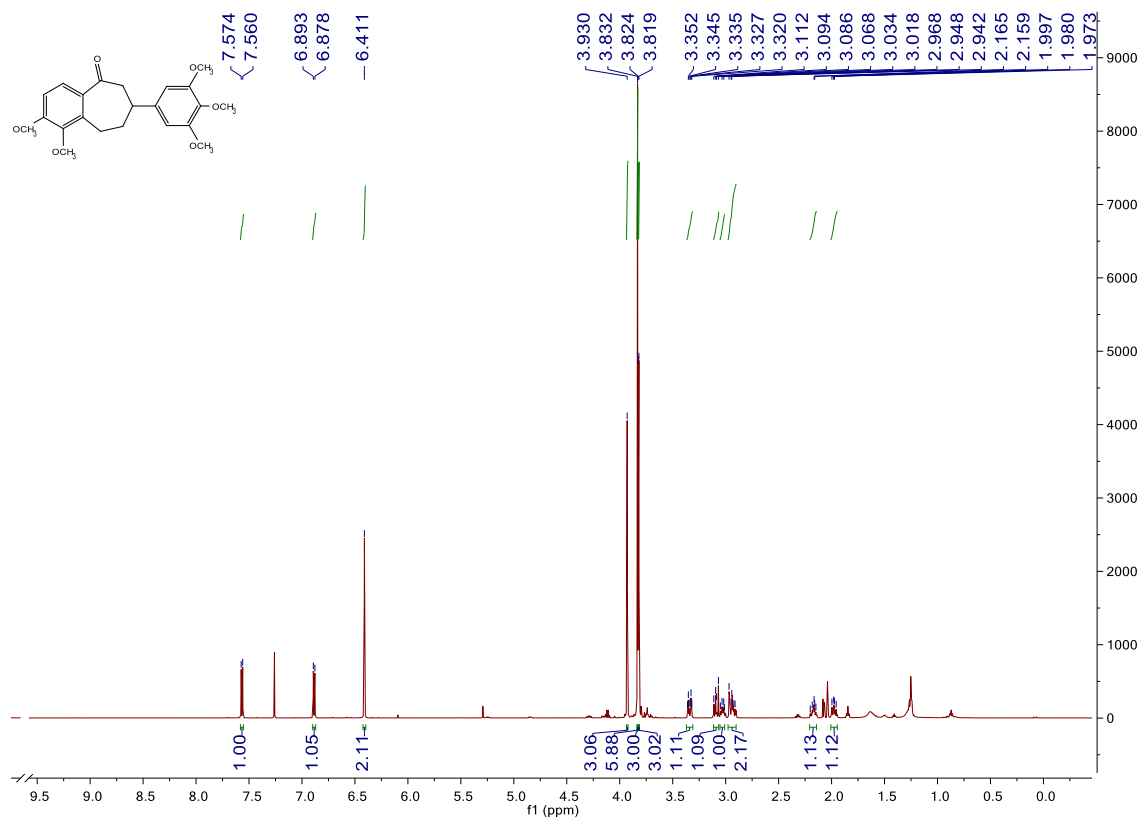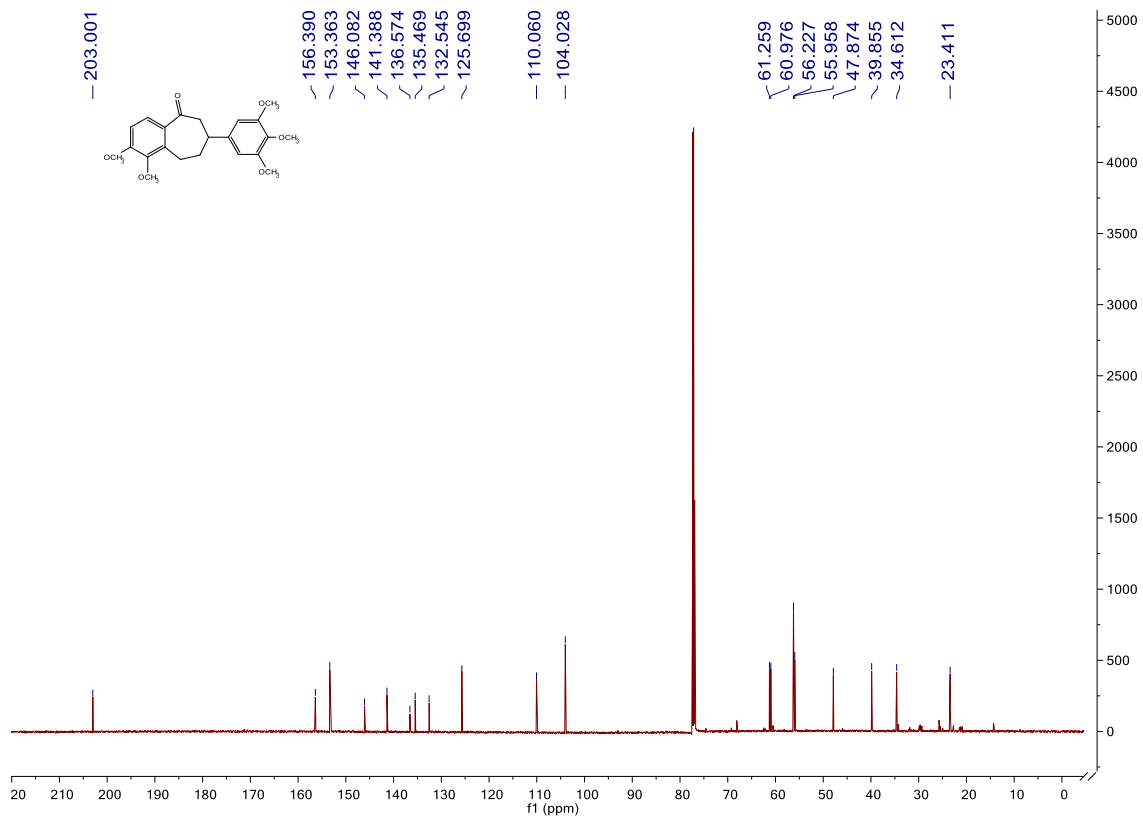

NHC\_4\_17\_Repurified\_esi #2-19 RT: 0.01-0.15 AV: 18 NL: 2.39E7  
T: FTMS + p ESI Full ms [100.00-1000.00]

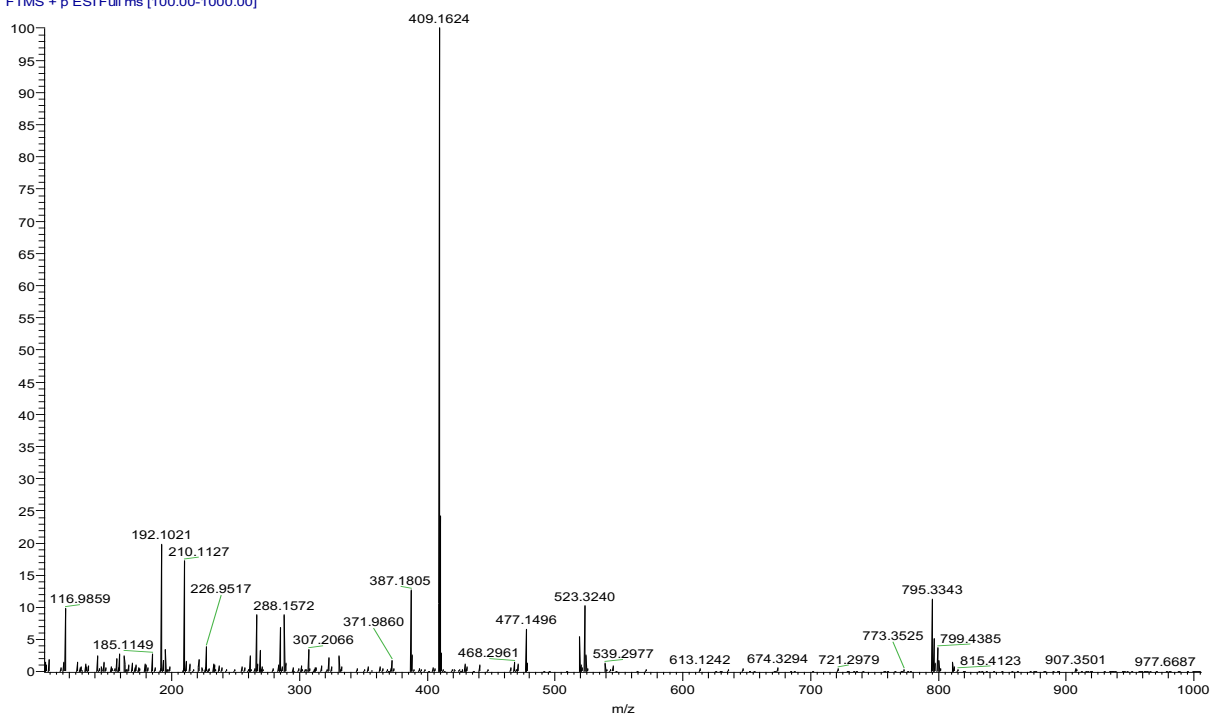



Data File C:\Chem32\1\Data\NHC\NHC\_4\_17\_KGP501\_sample.D  
Sample Name: NHC\_4\_17\_KGP501\_sample

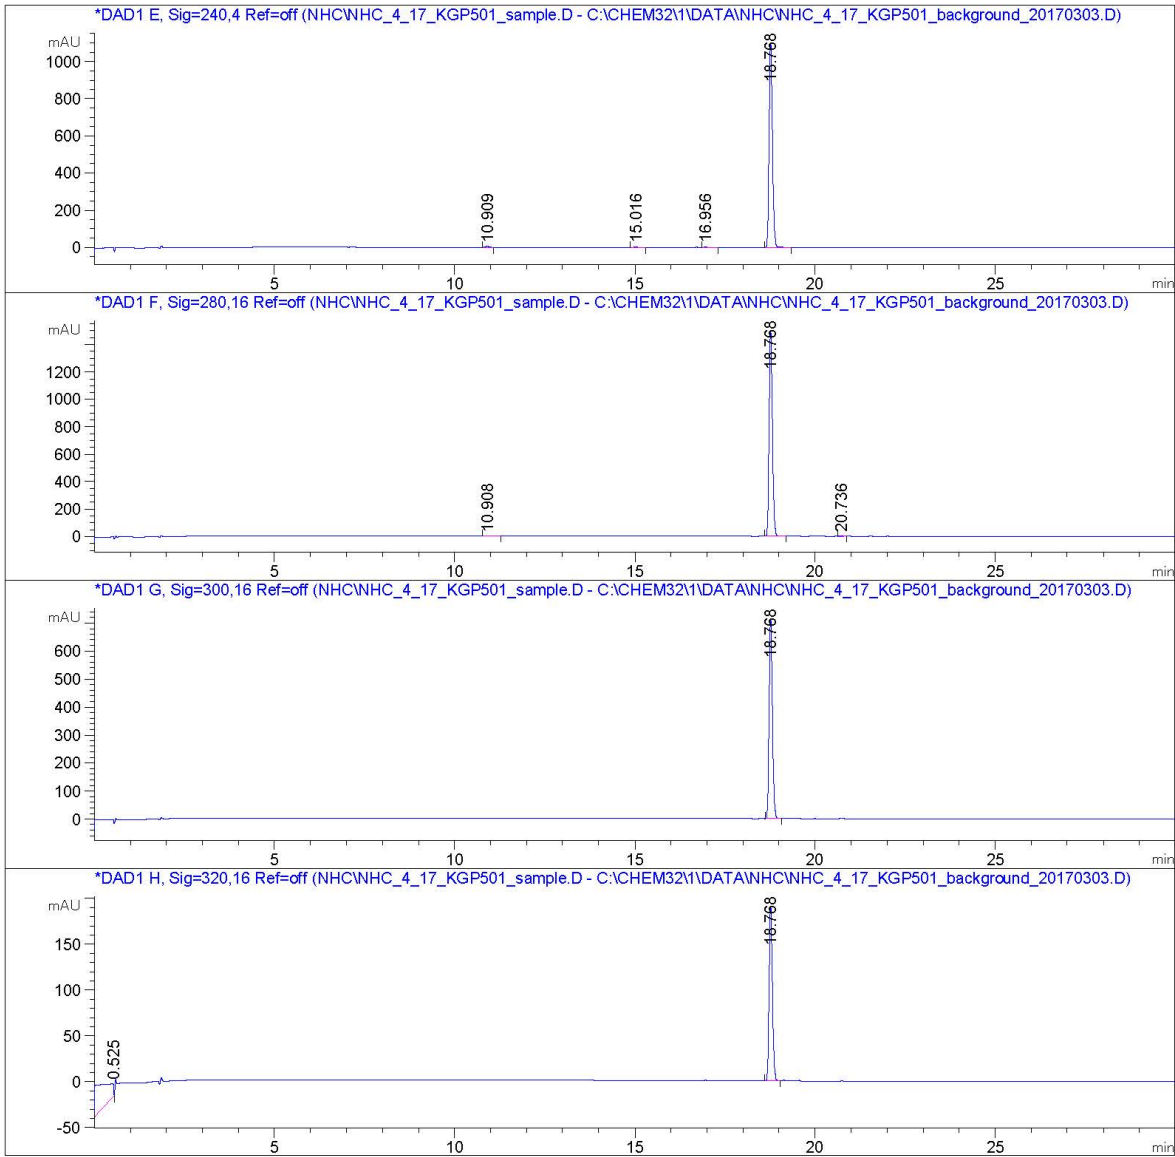

=====  
Area Percent Report  
=====

Sorted By : Signal  
Multiplier : 1.0000  
Dilution : 1.0000  
Do not use Multiplier & Dilution Factor with ISTDs



Data File C:\Chem32\1\Data\NHC\NHC\_4\_17\_KGP501\_sample.D  
Sample Name: NHC\_4\_17\_KGP501\_sample

Signal 1: DAD1 A, Sig=254,4 Ref=off  
Signal has been modified after loading from rawdata file!

| Peak # | RetTime [min] | Type | Width [min] | Area [mAU*s] | Height [mAU] | Area %  |
|--------|---------------|------|-------------|--------------|--------------|---------|
| 1      | 16.956        | VB   | 0.0960      | 9.14904      | 1.44154      | 0.2041  |
| 2      | 18.768        | BB   | 0.0941      | 4472.67627   | 724.20117    | 99.7959 |

Totals :                    4481.82531 725.64271

Signal 2: DAD1 B, Sig=254,16 Ref=off  
Signal has been modified after loading from rawdata file!

| Peak # | RetTime [min] | Type | Width [min] | Area [mAU*s] | Height [mAU] | Area %  |
|--------|---------------|------|-------------|--------------|--------------|---------|
| 1      | 16.956        | VB   | 0.0983      | 9.36114      | 1.43222      | 0.1979  |
| 2      | 18.768        | BB   | 0.0941      | 4720.95898   | 763.91931    | 99.8021 |

Totals :                    4730.32013 765.35153

Signal 3: DAD1 C, Sig=210,8 Ref=off  
Signal has been modified after loading from rawdata file!

| Peak # | RetTime [min] | Type | Width [min] | Area [mAU*s] | Height [mAU] | Area %  |
|--------|---------------|------|-------------|--------------|--------------|---------|
| 1      | 10.909        | VB   | 0.1029      | 227.68459    | 34.52555     | 0.9489  |
| 2      | 12.701        | BB   | 0.0925      | 27.14396     | 4.49487      | 0.1131  |
| 3      | 15.015        | BB   | 0.0878      | 68.21432     | 12.09876     | 0.2843  |
| 4      | 16.706        | VV   | 0.1112      | 19.18409     | 2.51008      | 0.0800  |
| 5      | 16.957        | VB   | 0.1237      | 52.35861     | 6.00665      | 0.2182  |
| 6      | 17.398        | BB   | 0.0850      | 6.04696      | 1.15729      | 0.0252  |
| 7      | 17.796        | BV   | 0.1082      | 15.01916     | 2.08054      | 0.0626  |
| 8      | 18.066        | VB   | 0.1194      | 17.44163     | 2.13384      | 0.0727  |
| 9      | 18.769        | BV   | 0.1417      | 2.33801e4    | 2683.31982   | 97.4383 |
| 10     | 19.196        | VV   | 0.1604      | 66.49103     | 5.76986      | 0.2771  |
| 11     | 19.416        | VV   | 0.1160      | 18.65642     | 2.36491      | 0.0778  |
| 12     | 19.566        | VB   | 0.0814      | 12.95463     | 2.46306      | 0.0540  |
| 13     | 19.930        | BB   | 0.2324      | 18.20497     | 1.12759      | 0.0759  |
| 14     | 20.737        | BB   | 0.1145      | 16.43744     | 2.07270      | 0.0685  |
| 15     | 25.538        | BB   | 0.0985      | 18.41706     | 2.88574      | 0.0768  |
| 16     | 27.731        | BB   | 0.1576      | 30.42202     | 3.01753      | 0.1268  |

Totals :                    2.39948e4 2768.02880

Data File C:\Chem32\1\Data\NHC\NHC\_4\_17\_KGP501\_sample.D  
Sample Name: NHC\_4\_17\_KGP501\_sample

Signal 4: DAD1 D, Sig=230,16 Ref=off  
Signal has been modified after loading from rawdata file!

| Peak # | RetTime [min] | Type | Width [min] | Area [mAU*s] | Height [mAU] | Area %  |
|--------|---------------|------|-------------|--------------|--------------|---------|
| 1      | 10.909        | BB   | 0.1027      | 52.31738     | 7.95528      | 0.3643  |
| 2      | 12.703        | BB   | 0.0951      | 6.79331      | 1.08438      | 0.0473  |
| 3      | 15.015        | BB   | 0.0953      | 17.88387     | 2.84835      | 0.1245  |
| 4      | 15.620        | BB   | 0.1899      | 13.54218     | 1.04021      | 0.0943  |
| 5      | 16.706        | BV   | 0.1322      | 11.10396     | 1.17575      | 0.0773  |
| 6      | 16.956        | VB   | 0.1122      | 24.10922     | 3.11717      | 0.1679  |
| 7      | 18.769        | BV   | 0.1053      | 1.42072e4    | 2144.07983   | 98.9335 |
| 8      | 19.419        | VV   | 0.1184      | 11.53812     | 1.39695      | 0.0803  |
| 9      | 19.566        | VB   | 0.0775      | 7.21468      | 1.41562      | 0.0502  |
| 10     | 20.736        | BB   | 0.0934      | 8.64906      | 1.45322      | 0.0602  |

Totals : 1.43603e4 2165.56676

Signal 5: DAD1 E, Sig=240,4 Ref=off  
Signal has been modified after loading from rawdata file!

| Peak # | RetTime [min] | Type | Width [min] | Area [mAU*s] | Height [mAU] | Area %  |
|--------|---------------|------|-------------|--------------|--------------|---------|
| 1      | 10.909        | BB   | 0.1030      | 23.75278     | 3.59800      | 0.3441  |
| 2      | 15.016        | BB   | 0.0986      | 9.20544      | 1.40269      | 0.1333  |
| 3      | 16.956        | VB   | 0.1113      | 11.48606     | 1.50115      | 0.1664  |
| 4      | 18.768        | BB   | 0.0989      | 6859.28076   | 1097.56555   | 99.3562 |

Totals : 6903.72504 1104.06739

Signal 6: DAD1 F, Sig=280,16 Ref=off  
Signal has been modified after loading from rawdata file!

| Peak # | RetTime [min] | Type | Width [min] | Area [mAU*s] | Height [mAU] | Area %  |
|--------|---------------|------|-------------|--------------|--------------|---------|
| 1      | 10.908        | BB   | 0.1062      | 8.45509      | 1.22953      | 0.0908  |
| 2      | 18.768        | BB   | 0.0985      | 9296.77246   | 1496.94958   | 99.8133 |
| 3      | 20.736        | BB   | 0.0934      | 8.93848      | 1.50160      | 0.0960  |

Totals : 9314.16603 1499.68071

Signal 7: DAD1 G, Sig=300,16 Ref=off  
Signal has been modified after loading from rawdata file!

Data File C:\Chem32\1\Data\NHC\NHC\_4\_17\_KGP501\_sample.D  
Sample Name: NHC\_4\_17\_KGP501\_sample

| Peak # | RetTime [min] | Type | Width [min] | Area [mAU*s] | Height [mAU] | Area %   |
|--------|---------------|------|-------------|--------------|--------------|----------|
| 1      | 18.768        | BB   | 0.0940      | 4402.45361   | 713.63989    | 100.0000 |

Totals :                    4402.45361 713.63989

Signal 8: DAD1 H, Sig=320,16 Ref=off  
Signal has been modified after loading from rawdata file!

| Peak # | RetTime [min] | Type | Width [min] | Area [mAU*s] | Height [mAU] | Area %  |
|--------|---------------|------|-------------|--------------|--------------|---------|
| 1      | 0.525         | BB   | 0.6315      | 786.67737    | 14.86395     | 40.1537 |
| 2      | 18.768        | BV   | 0.0939      | 1172.48682   | 190.23064    | 59.8463 |

Totals :                    1959.16418 205.09458

=====  
\*\*\* End of Report \*\*\*

58. 2-isopropoxy-3-methoxybenzaldehyde

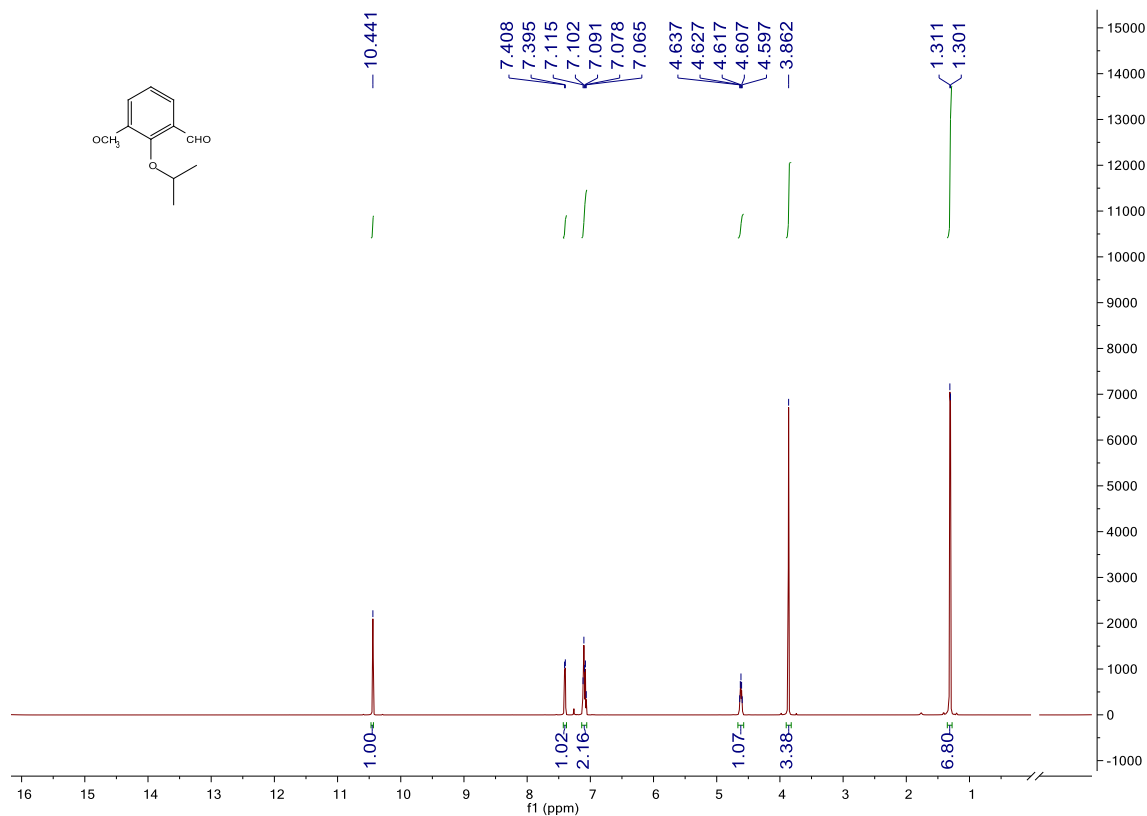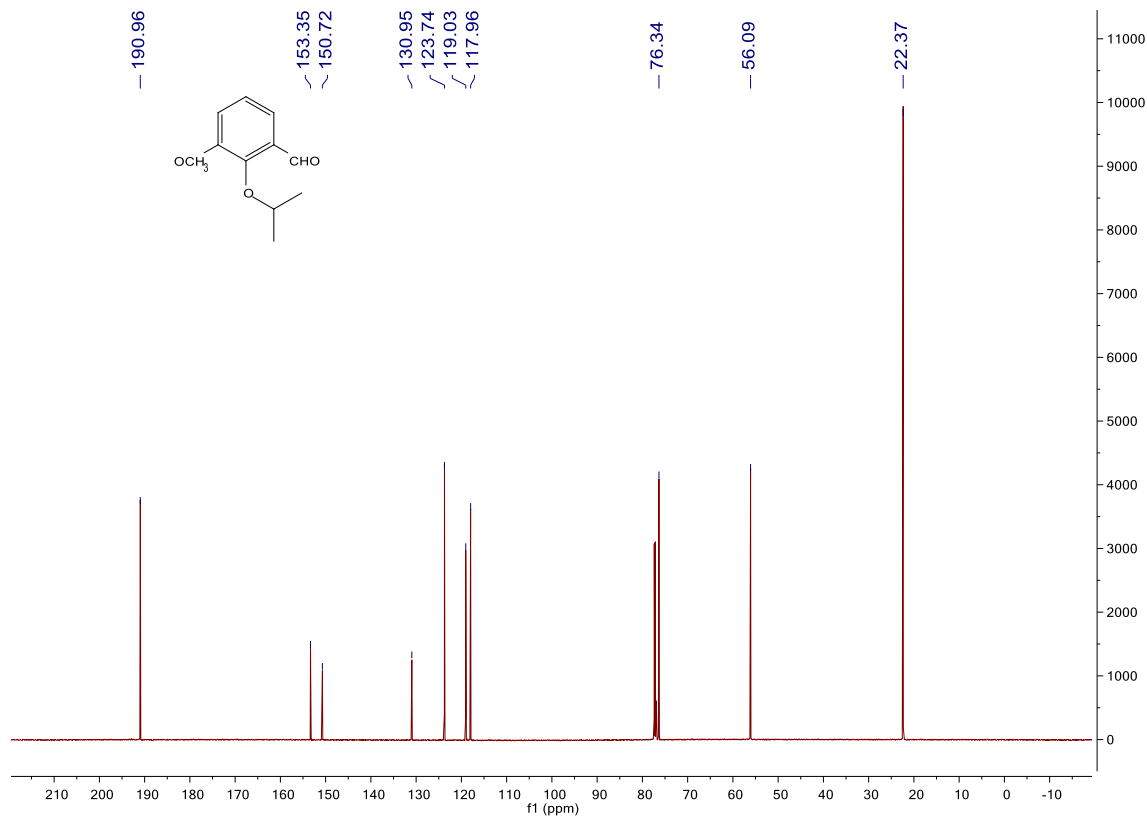

60. ethyl 5-(2-isopropoxy-3-methoxyphenyl)-3-oxopentanoate

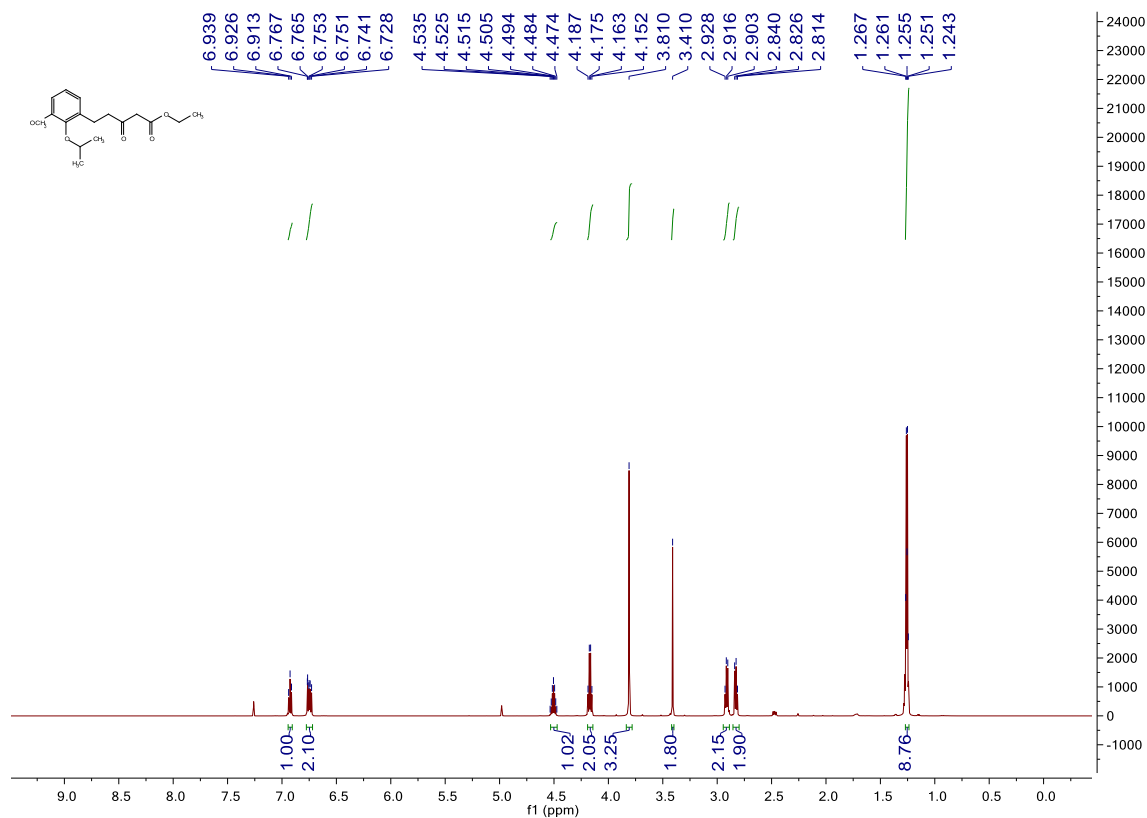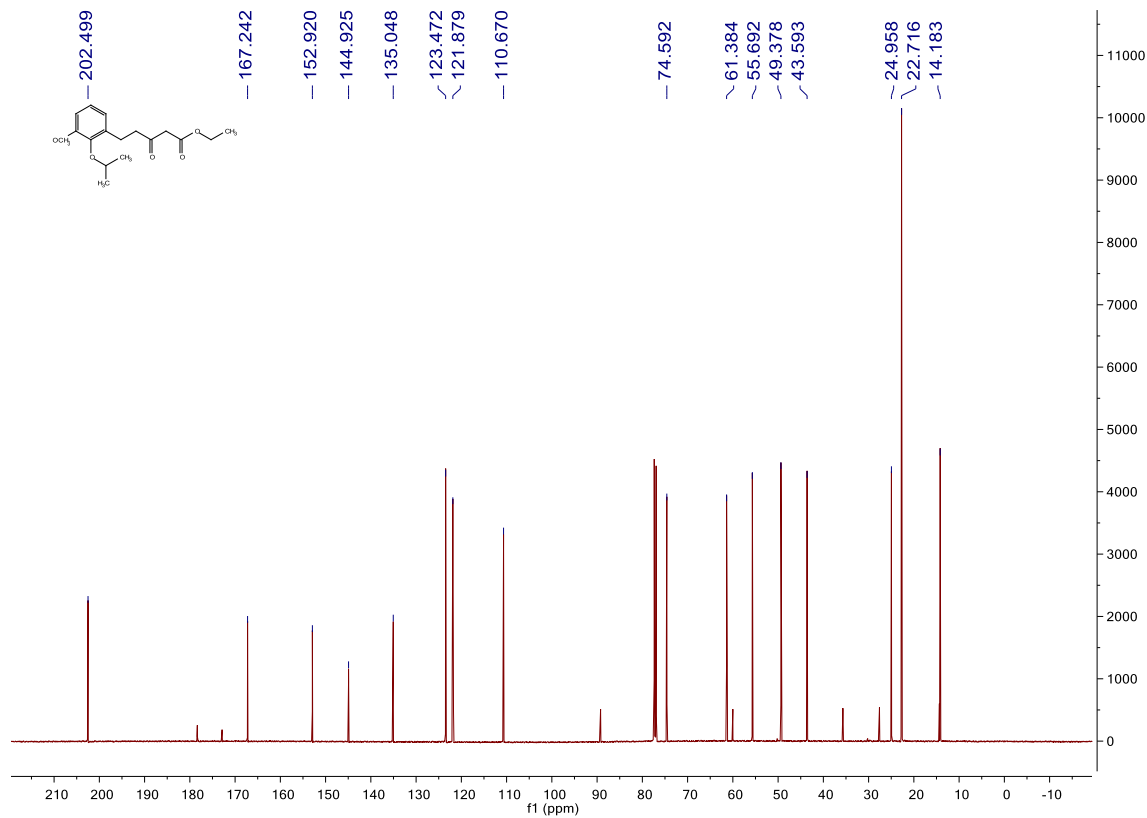

**61. ethyl 3-hydroxy-5-(2-isopropoxy-3-methoxyphenyl)pentanoate**

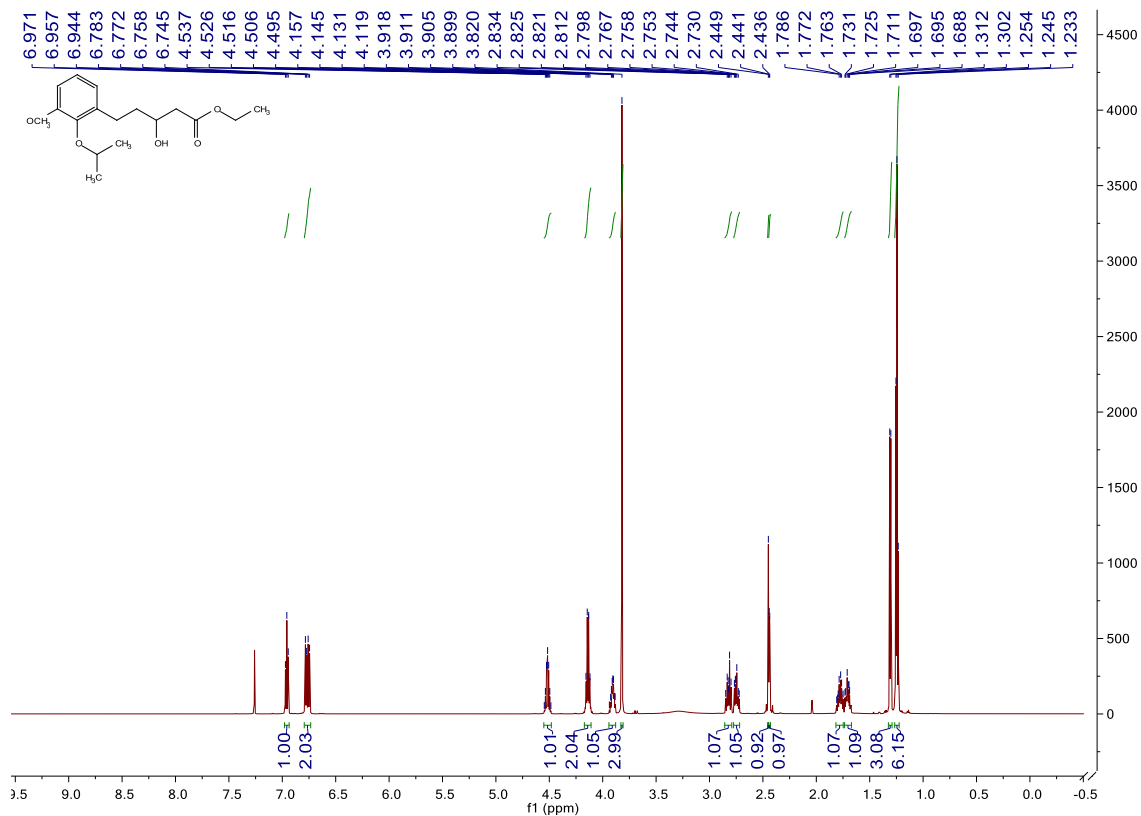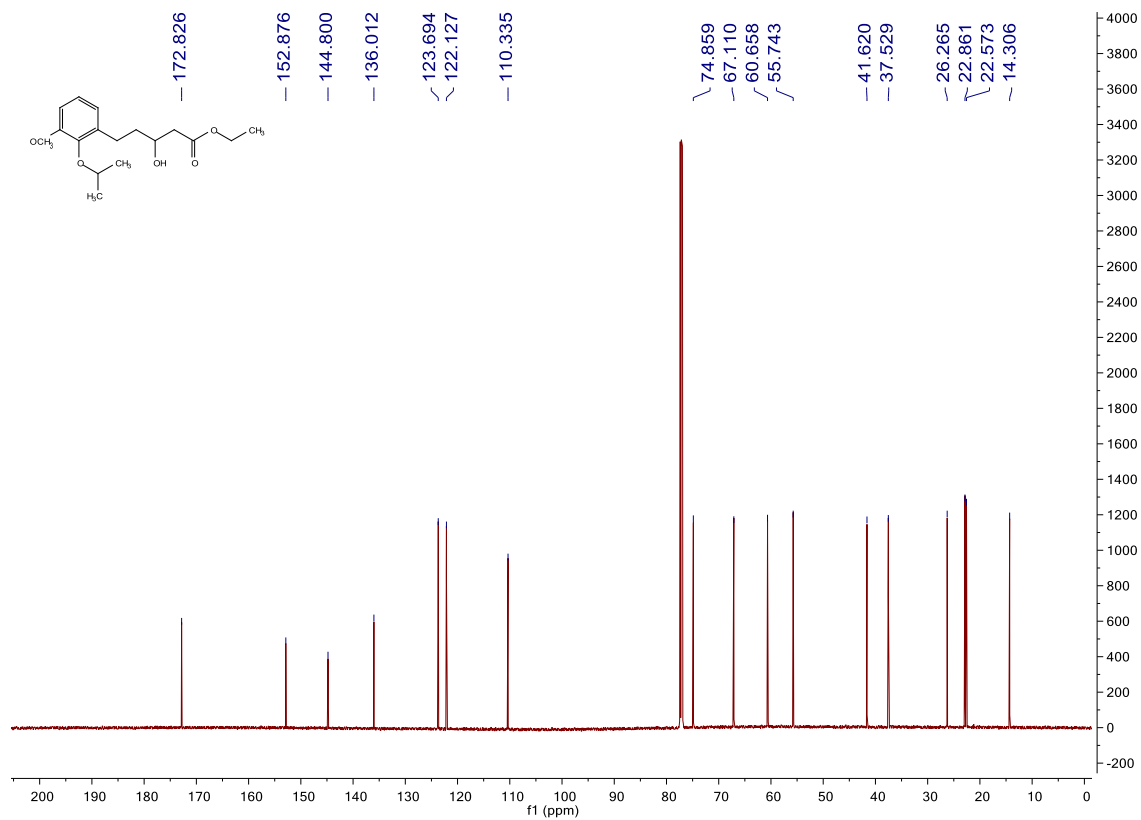

62. ethyl 3-((tert-butyldiphenylsilyloxy)-5-(2-isopropoxy-3-methoxyphenyl)pentanoate

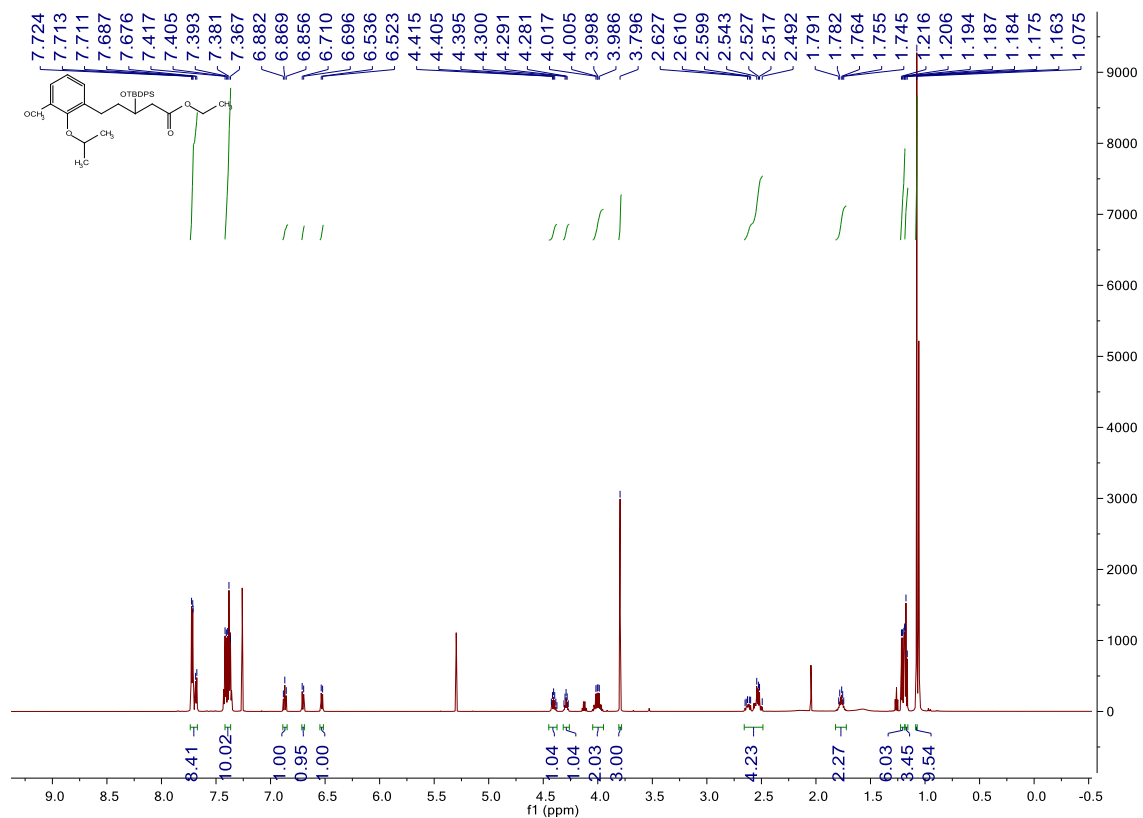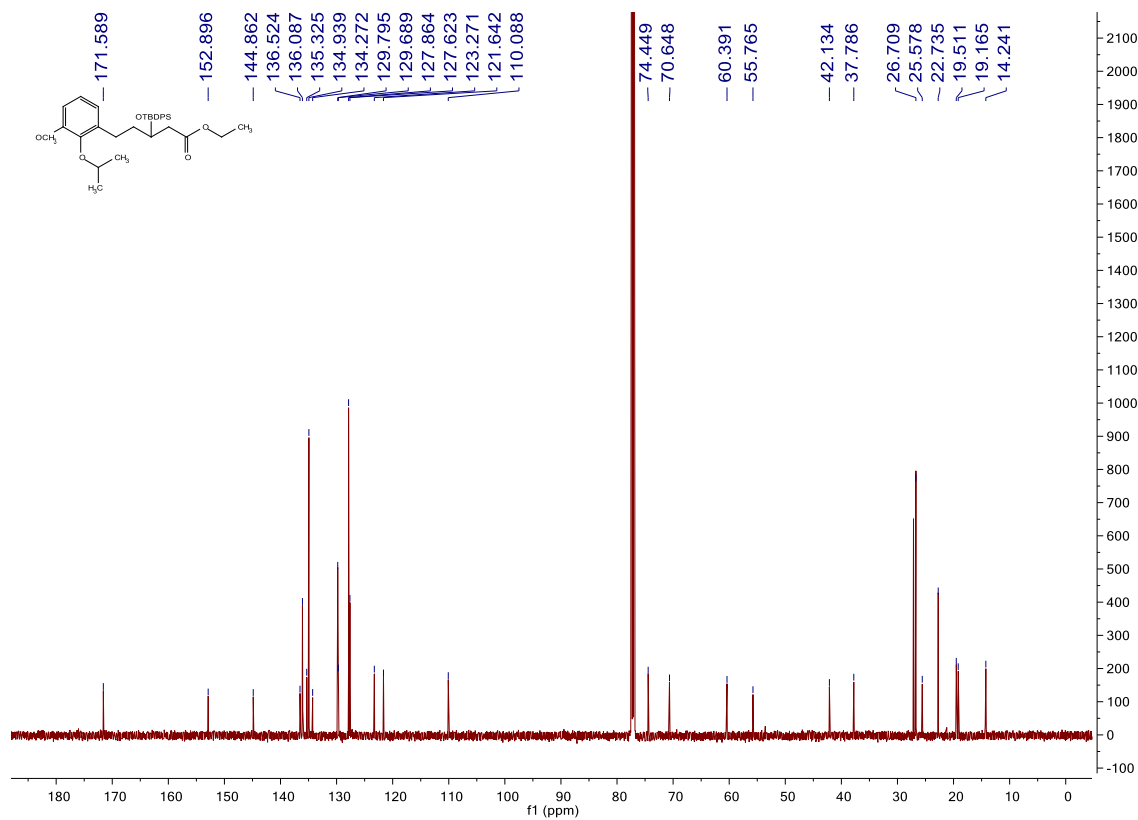

**63. 3-((tert-butyldiphenylsilyloxy)-5-(2-isopropoxy-3-methoxyphenyl)pentanoic acid**

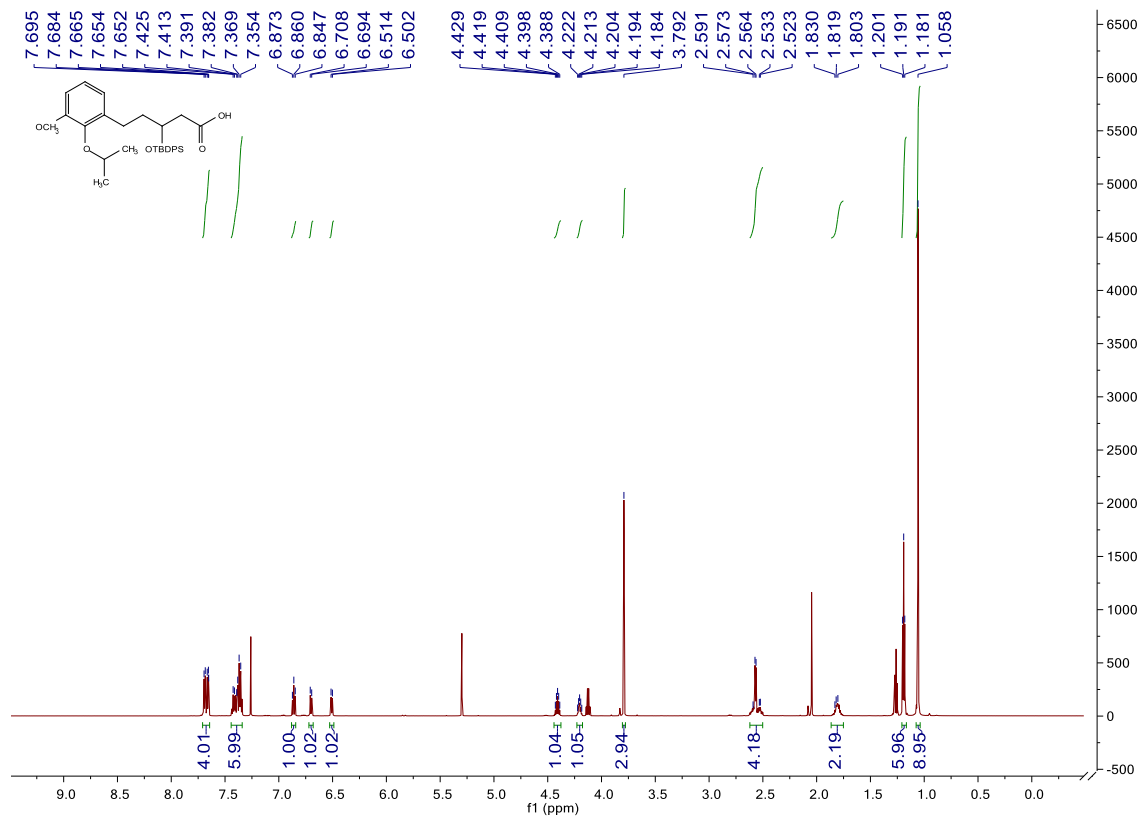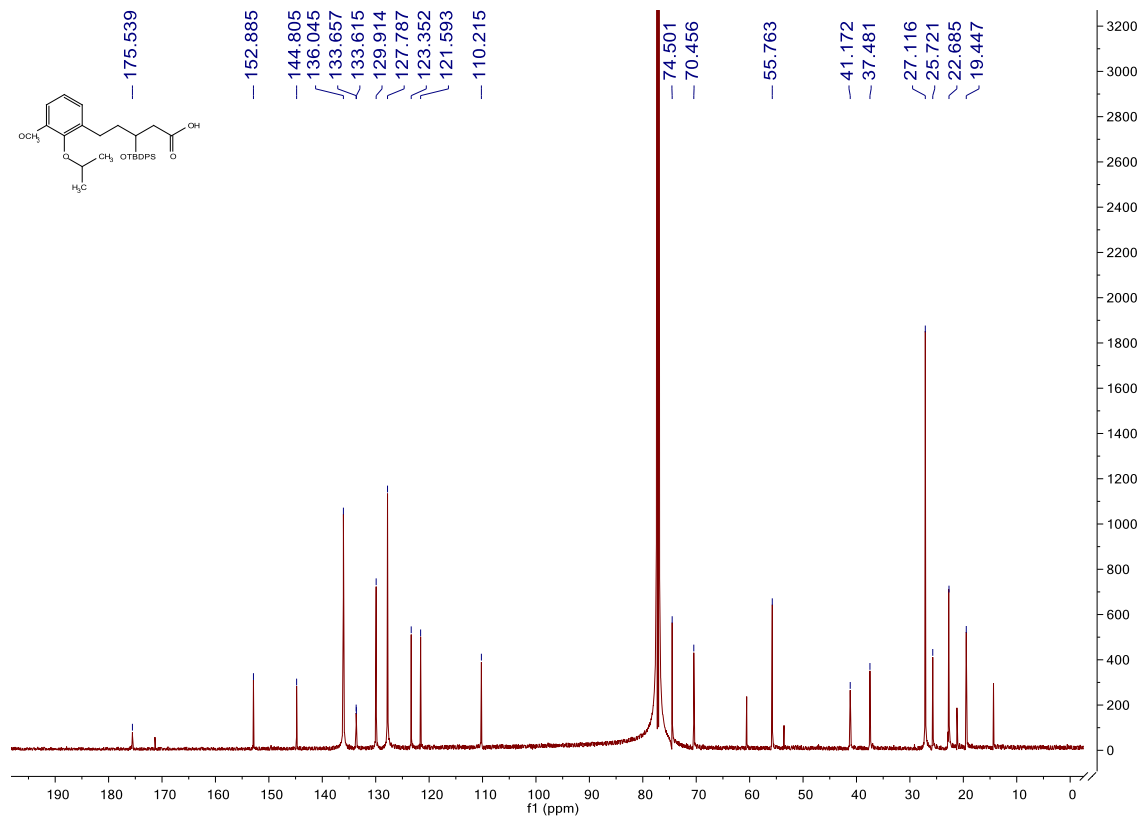



**64. 7-((tert-butyldiphenylsilyl)oxy)-1-isopropoxy-2-methoxy-6,7,8,9-tetrahydro-5H-benzo[7]annulen-5-one**

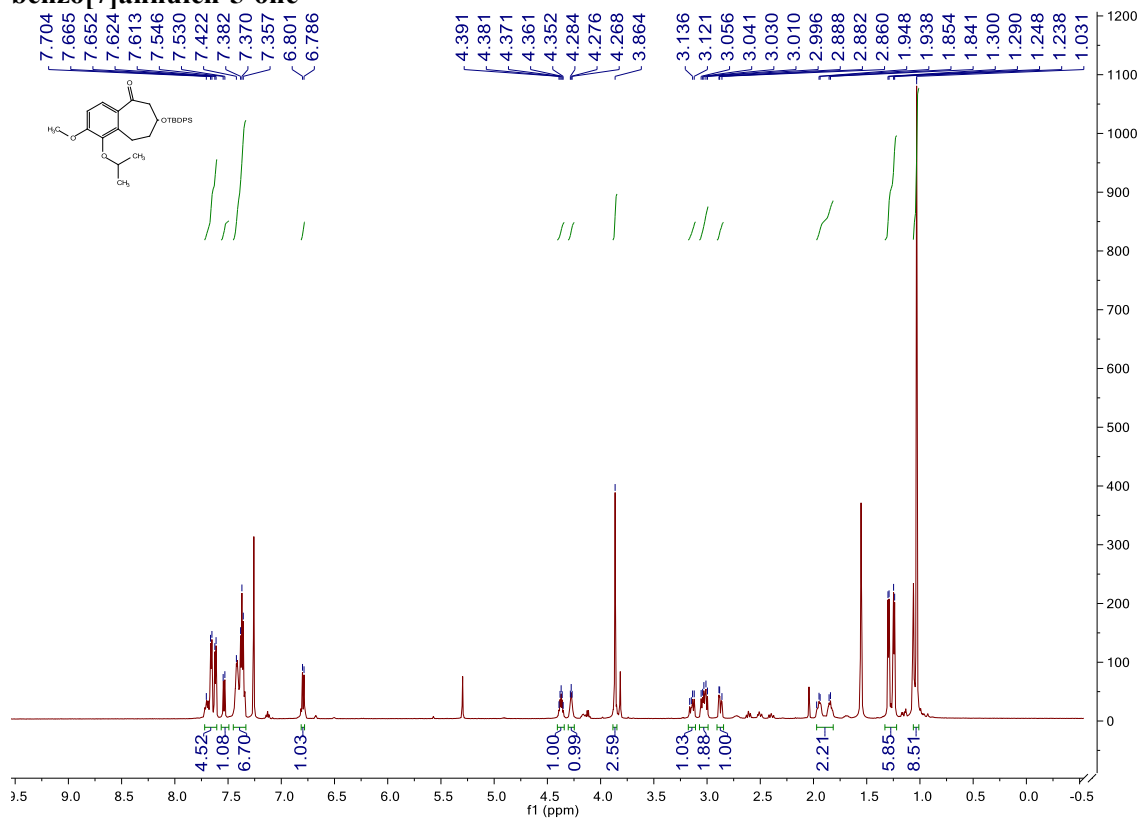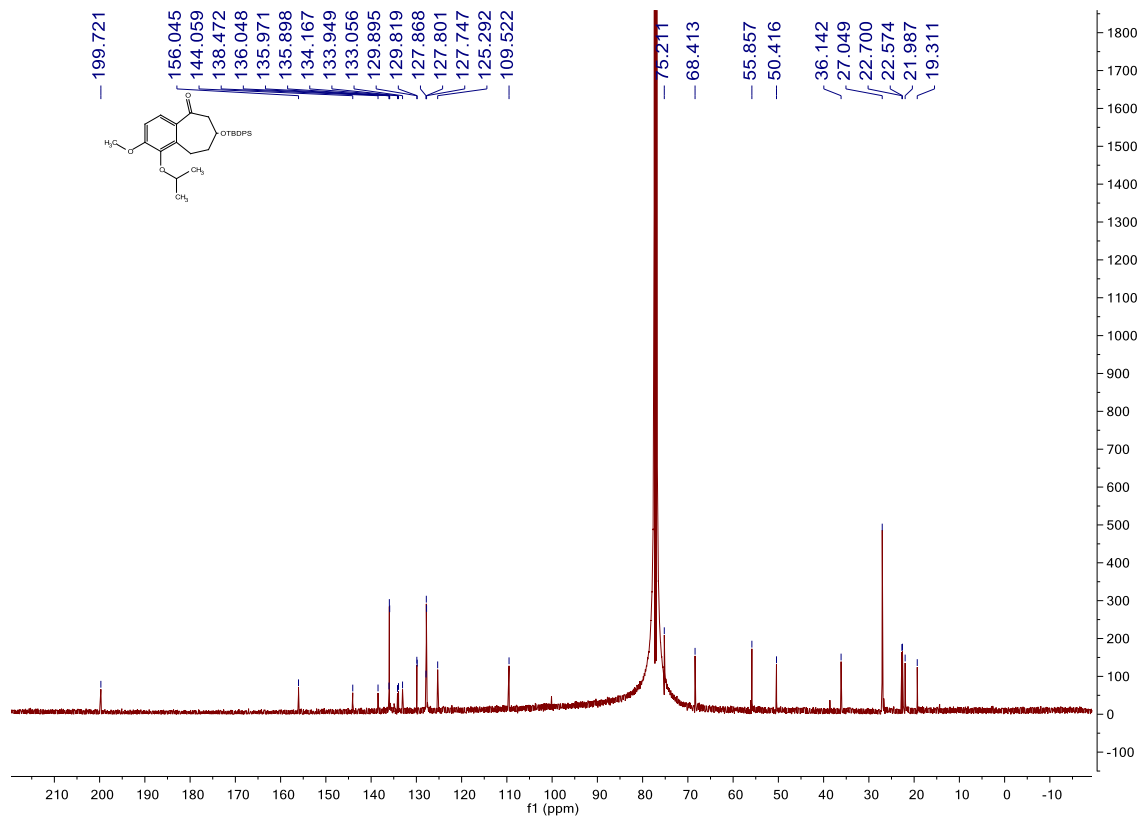

65. 7-hydroxy-1-isopropoxy-2-methoxy-6,7,8,9-tetrahydro-5H-benzo[7]annulen-5-one

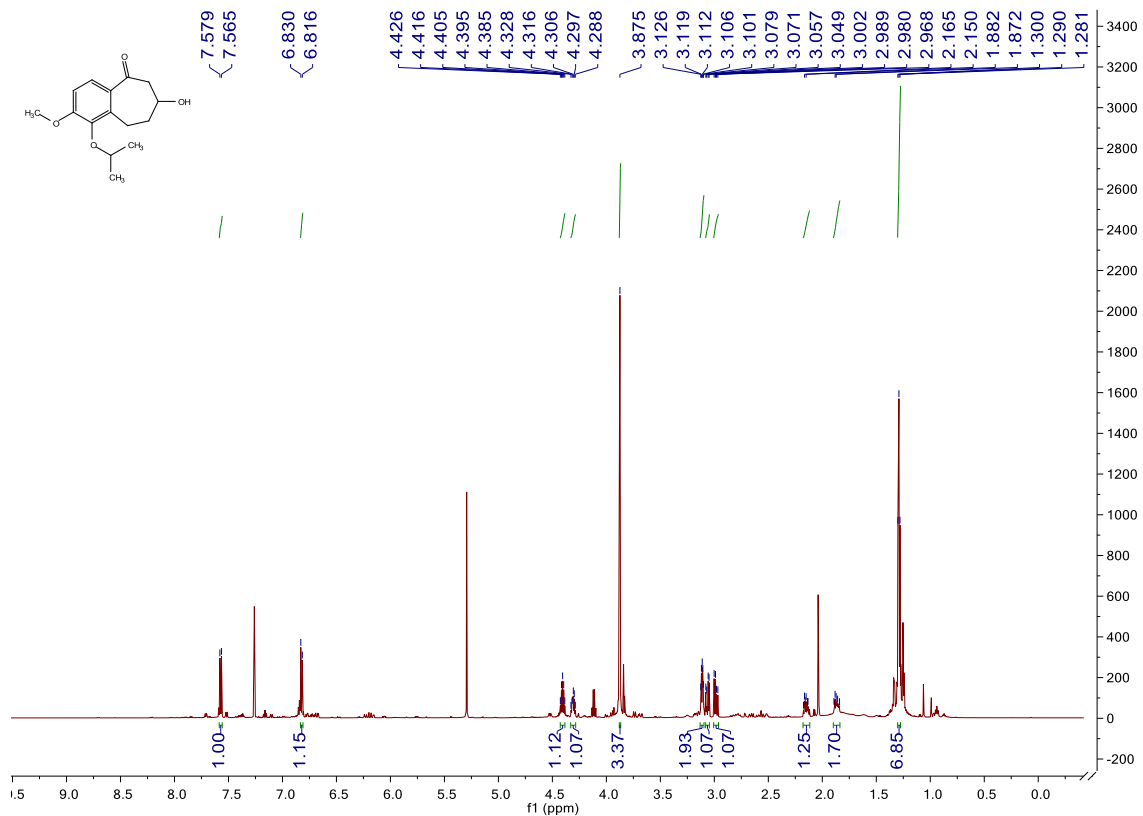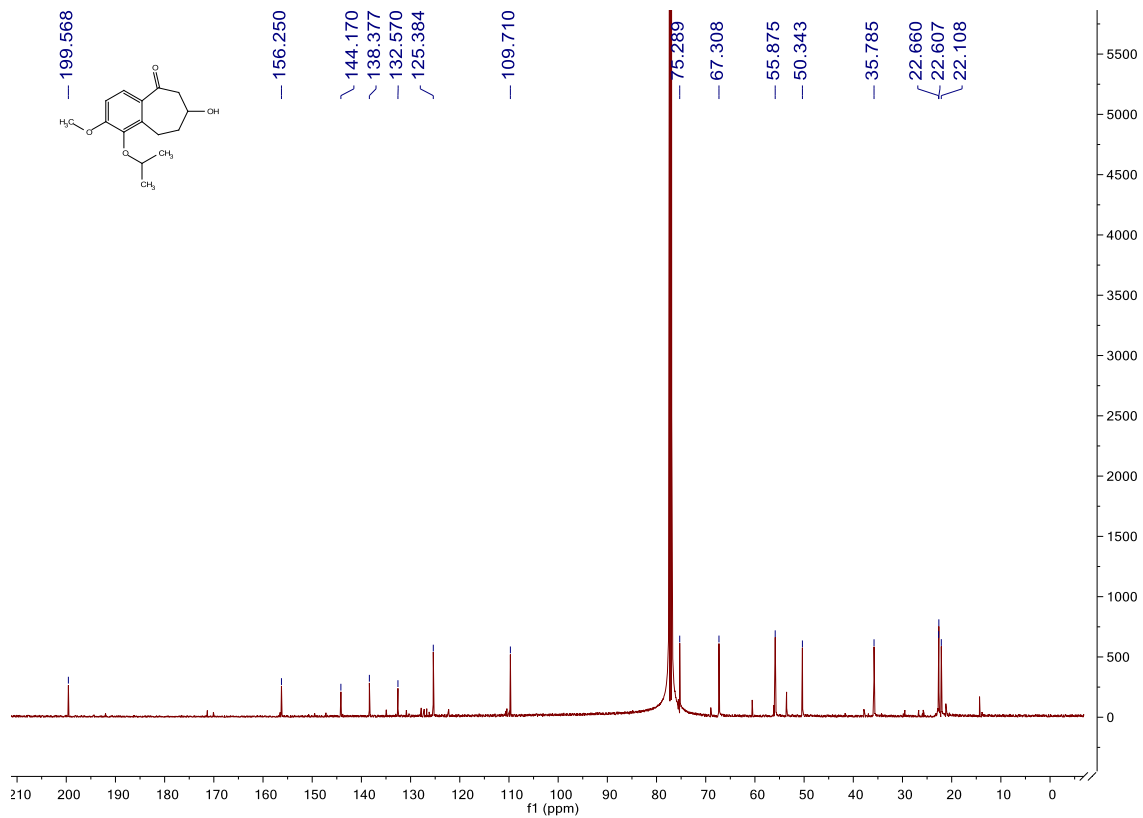

66. 1-isopropoxy-2-methoxy-7-((trimethylsilyl)oxy)-6,7,8,9-tetrahydro-5H-benzo[7]annulen-5-one

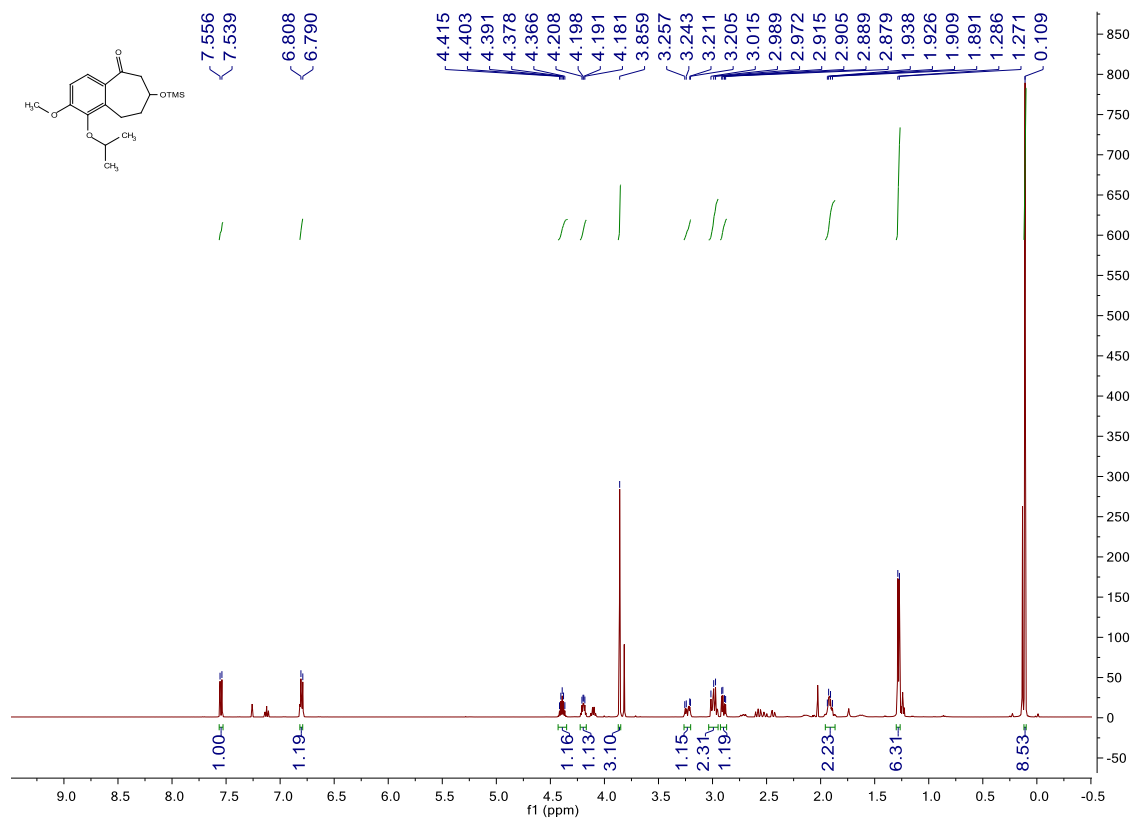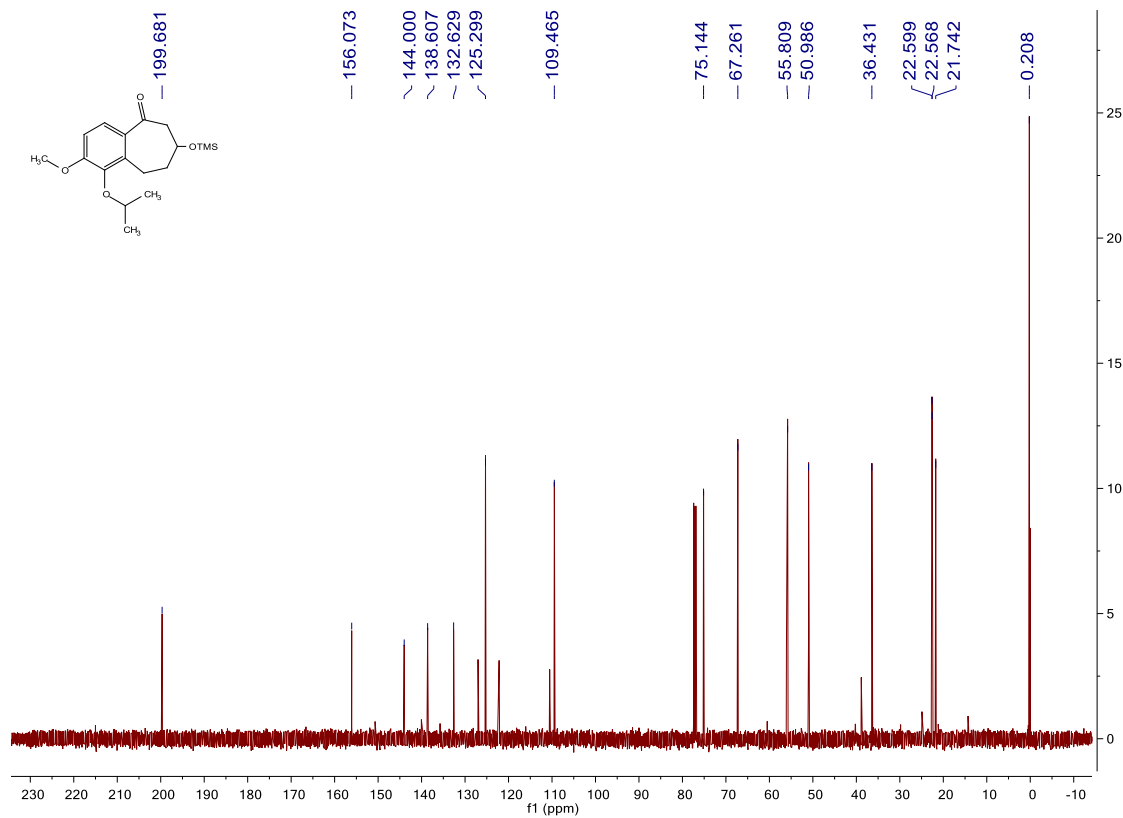

67. 4-isopropoxy-3-methoxy-9-(3,4,5-trimethoxyphenyl)-5H-benzo[7]annulene

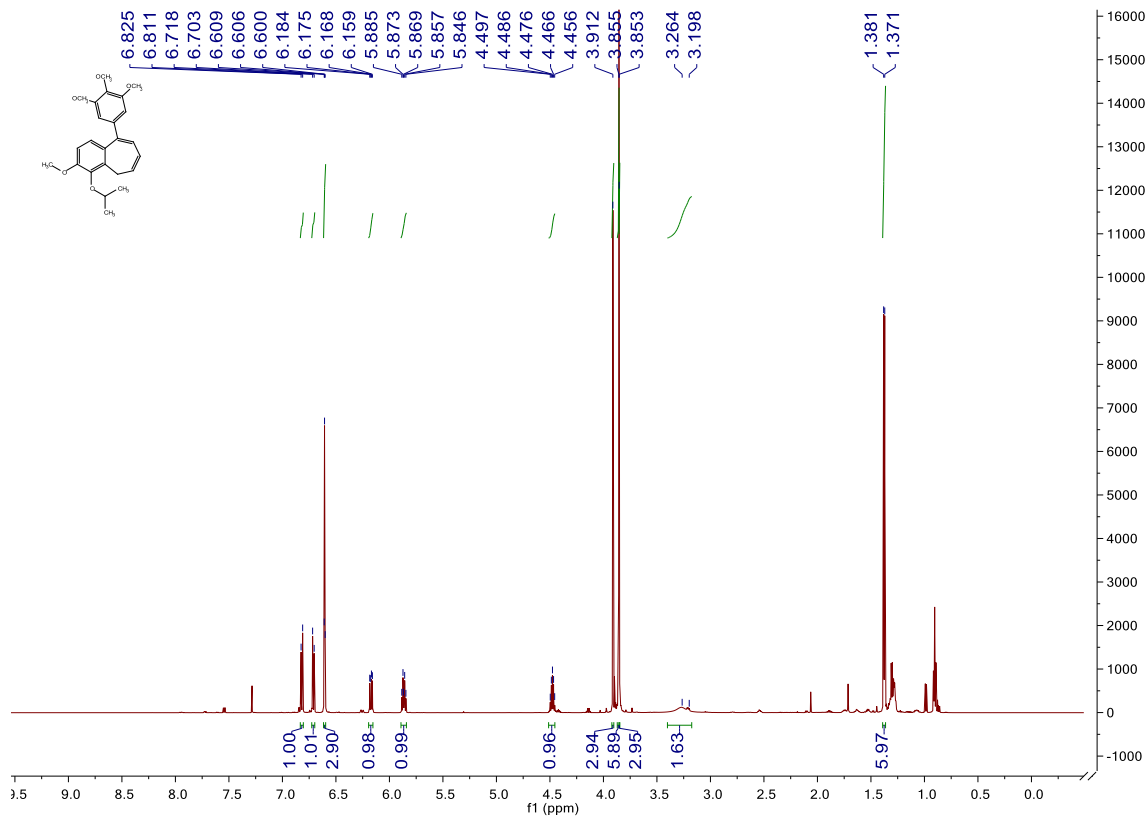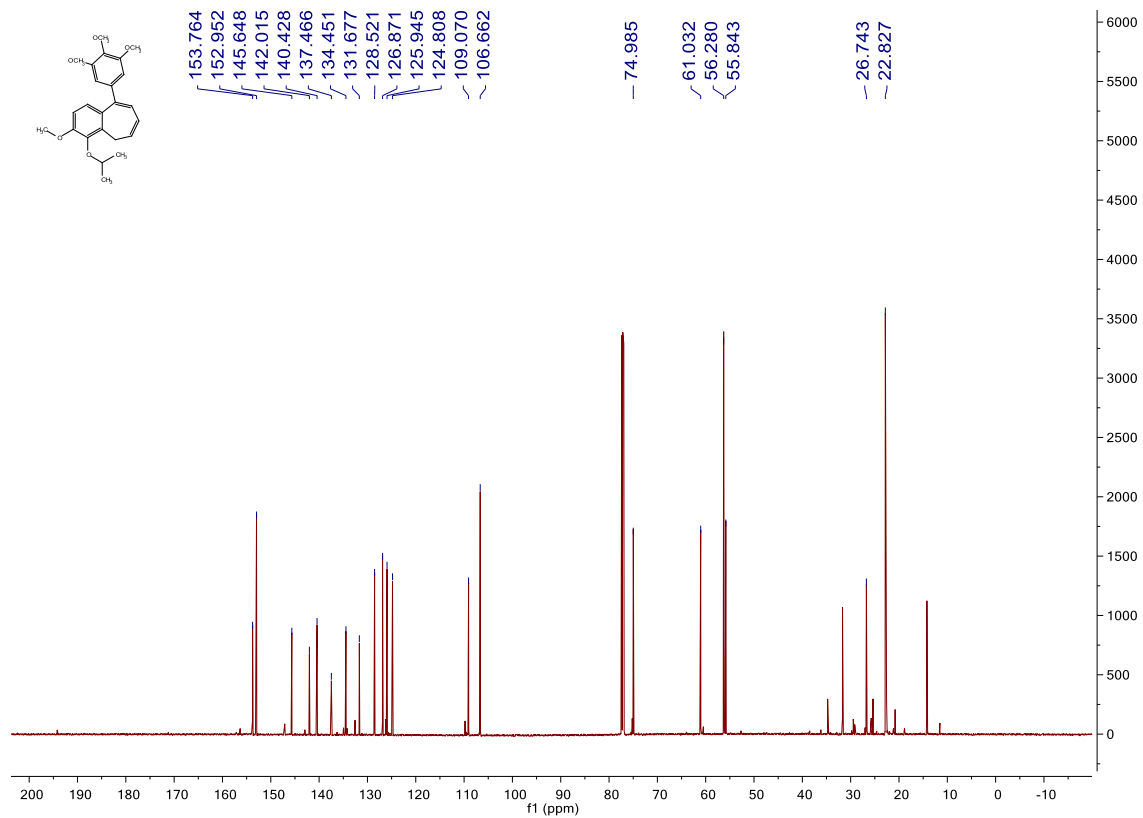

68. 3-methoxy-9-(3,4,5-trimethoxyphenyl)-5H-benzo[7]annulen-4-ol

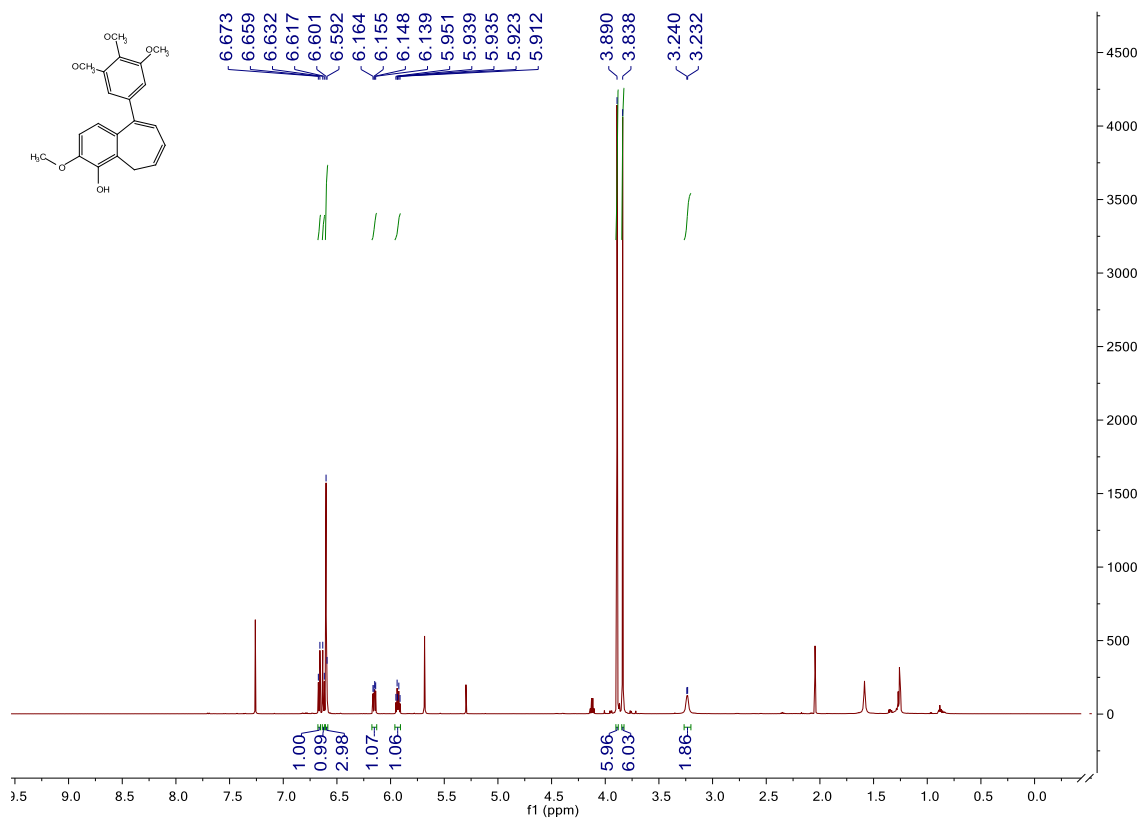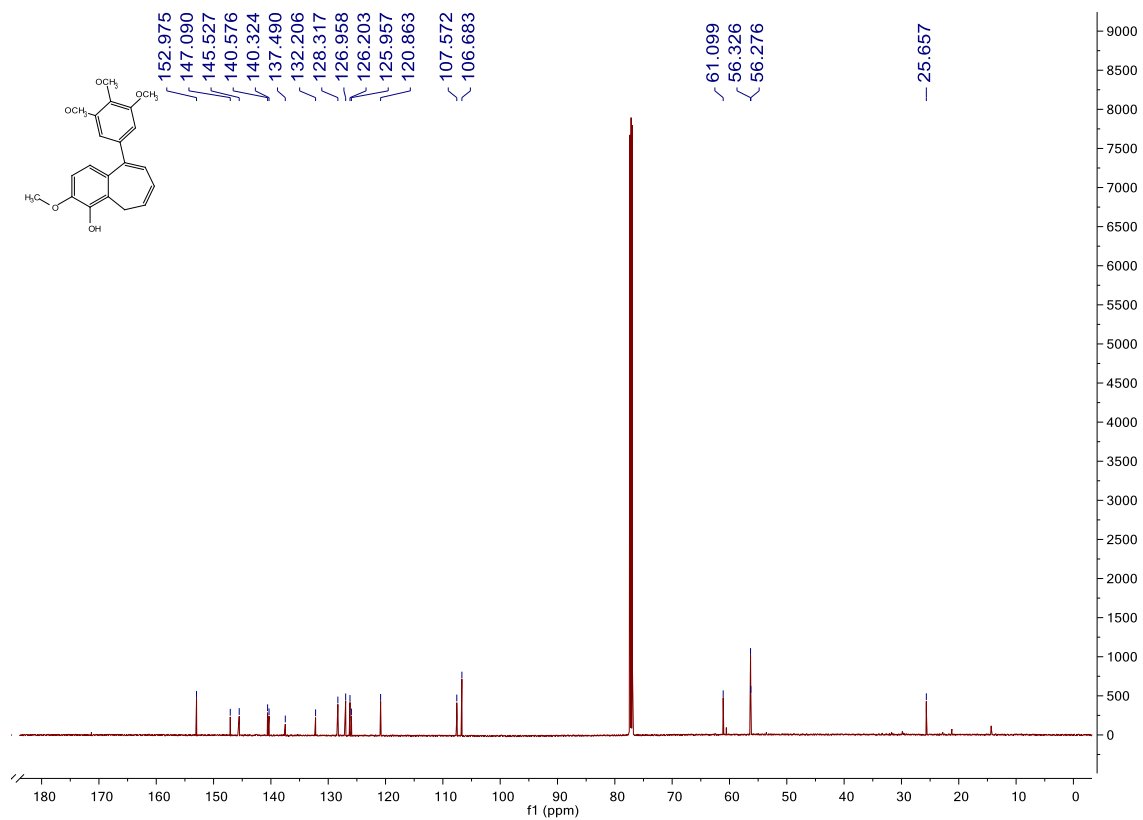

NHC\_4\_29\_F2\_+ESI#2-17 RT: 0.01-0.16 AV: 16 NL: 6.83E6  
T: FTMS + p ESI Full ms [200.00-1000.00]

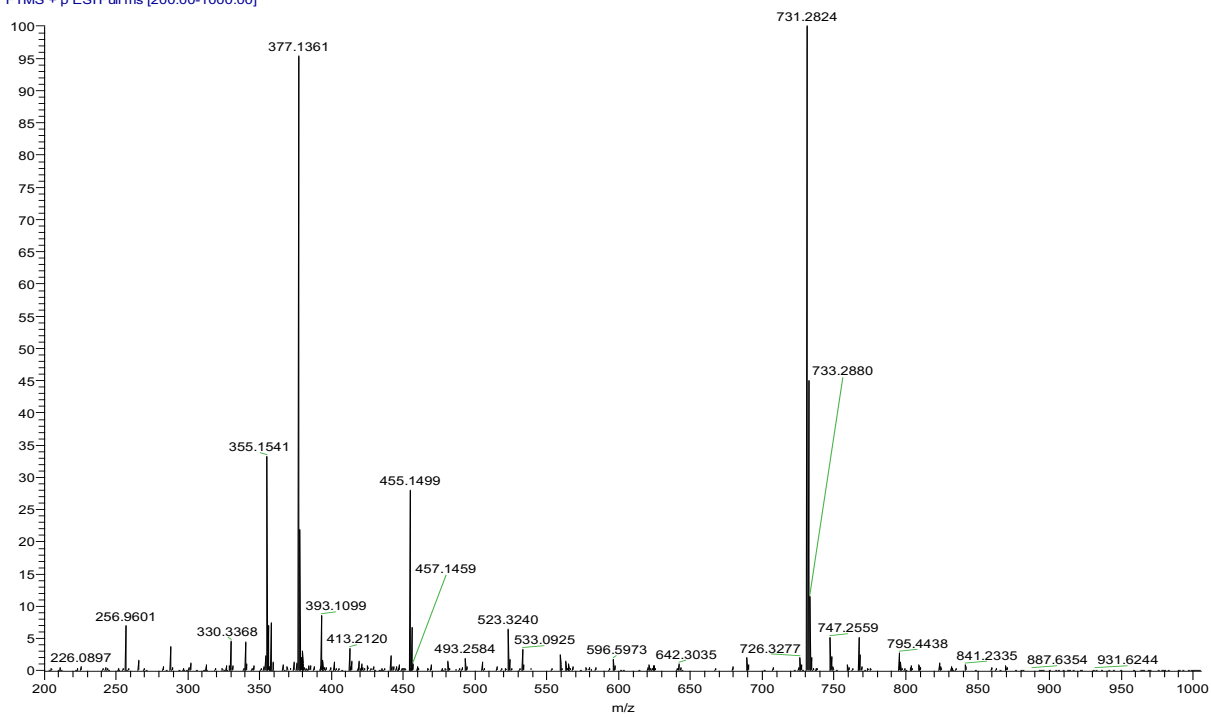



Data File C:\Chem32\1\Data\NHC\NHC\_4\_29\_F2.D

Sample Name: run

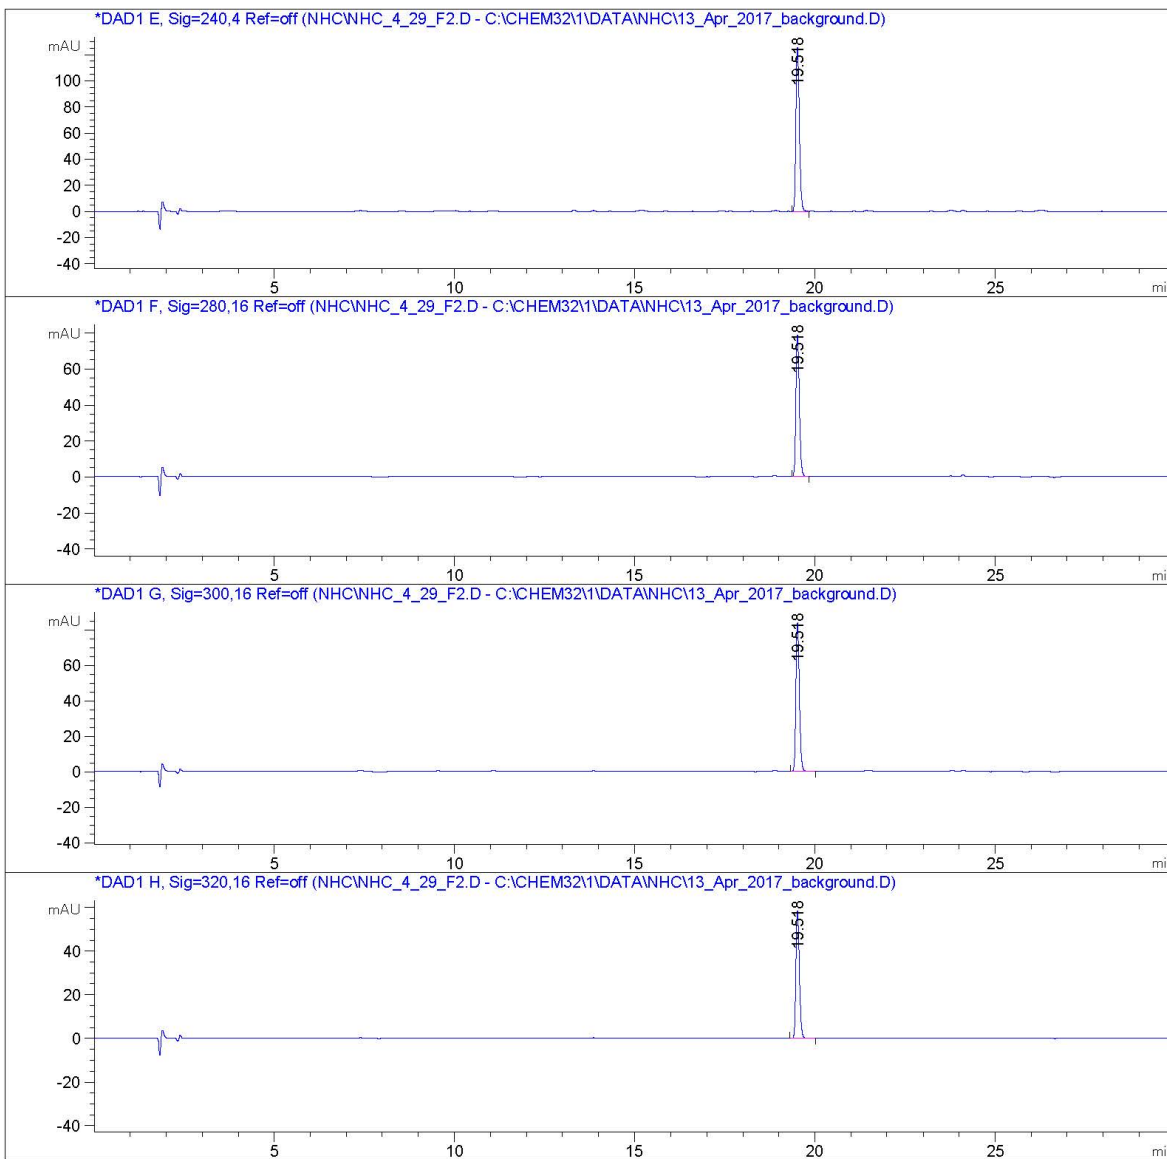

=====  
Area Percent Report  
=====

Sorted By : Signal  
Multiplier : 1.0000  
Dilution : 1.0000  
Use Multiplier & Dilution Factor with ISTDs



Data File C:\Chem32\1\Data\NHC\NHC\_4\_29\_F2.D  
Sample Name: run

Signal 1: DAD1 A, Sig=254,4 Ref=off  
Signal has been modified after loading from rawdata file!

| Peak #   | RetTime [min] | Type | Width [min] | Area [mAU*s] | Height [mAU] | Area %   |
|----------|---------------|------|-------------|--------------|--------------|----------|
| 1        | 19.518        | BB   | 0.1037      | 893.67578    | 134.17885    | 100.0000 |
| Totals : |               |      |             | 893.67578    | 134.17885    |          |

Signal 2: DAD1 B, Sig=254,16 Ref=off  
Signal has been modified after loading from rawdata file!

| Peak #   | RetTime [min] | Type | Width [min] | Area [mAU*s] | Height [mAU] | Area %  |
|----------|---------------|------|-------------|--------------|--------------|---------|
| 1        | 2.387         | VB   | 0.1446      | 76.20650     | 6.91596      | 8.0878  |
| 2        | 19.518        | BB   | 0.1037      | 866.02875    | 130.02982    | 91.9122 |
| Totals : |               |      |             | 942.23525    | 136.94578    |         |

Signal 3: DAD1 C, Sig=210,8 Ref=off  
Signal has been modified after loading from rawdata file!

| Peak #   | RetTime [min] | Type | Width [min] | Area [mAU*s] | Height [mAU] | Area %  |
|----------|---------------|------|-------------|--------------|--------------|---------|
| 1        | 8.891         | BB   | 0.2174      | 21.26654     | 1.31029      | 0.8596  |
| 2        | 10.043        | BB   | 0.0923      | 40.79895     | 6.40773      | 1.6491  |
| 3        | 10.424        | BB   | 0.0892      | 8.80127      | 1.48347      | 0.3557  |
| 4        | 13.320        | BB   | 0.0991      | 10.09099     | 1.52677      | 0.4079  |
| 5        | 18.264        | BB   | 0.1176      | 8.73953      | 1.16396      | 0.3532  |
| 6        | 19.518        | BB   | 0.1038      | 2244.24927   | 336.59158    | 90.7107 |
| 7        | 21.426        | BB   | 0.1681      | 17.70563     | 1.45380      | 0.7156  |
| 8        | 23.777        | BV   | 0.1809      | 16.40671     | 1.43975      | 0.6631  |
| 9        | 24.105        | VB   | 0.1170      | 11.36482     | 1.49017      | 0.4594  |
| 10       | 25.443        | BB   | 0.1471      | 32.64170     | 3.19694      | 1.3193  |
| 11       | 26.318        | BB   | 0.3383      | 31.05574     | 1.41386      | 1.2552  |
| 12       | 27.669        | BB   | 0.1670      | 30.95303     | 2.93546      | 1.2511  |
| Totals : |               |      |             | 2474.07416   | 360.41377    |         |

Signal 4: DAD1 D, Sig=230,16 Ref=off  
Signal has been modified after loading from rawdata file!

| Peak # | RetTime [min] | Type | Width [min] | Area [mAU*s] | Height [mAU] | Area %  |
|--------|---------------|------|-------------|--------------|--------------|---------|
| 1      | 10.042        | BB   | 0.0735      | 8.04291      | 1.69065      | 0.6140  |
| 2      | 19.518        | BB   | 0.1039      | 1265.59241   | 189.50731    | 96.6177 |

Data File C:\Chem32\1\Data\NHC\NHC\_4\_29\_F2.D

Sample Name: run

| Peak # | RetTime [min] | Type | Width [min] | Area [mAU*s] | Height [mAU] | Area % |
|--------|---------------|------|-------------|--------------|--------------|--------|
| 3      | 24.108        | BB   | 0.1117      | 7.96165      | 1.11024      | 0.6078 |
| 4      | 26.260        | BB   | 0.2896      | 28.30067     | 1.27207      | 2.1605 |

Totals : 1309.89764 193.58027

Signal 5: DAD1 E, Sig=240,4 Ref=off  
Signal has been modified after loading from rawdata file!

| Peak # | RetTime [min] | Type | Width [min] | Area [mAU*s] | Height [mAU] | Area %   |
|--------|---------------|------|-------------|--------------|--------------|----------|
| 1      | 19.518        | BB   | 0.1037      | 836.45416    | 125.52441    | 100.0000 |

Totals : 836.45416 125.52441

Signal 6: DAD1 F, Sig=280,16 Ref=off  
Signal has been modified after loading from rawdata file!

| Peak # | RetTime [min] | Type | Width [min] | Area [mAU*s] | Height [mAU] | Area %   |
|--------|---------------|------|-------------|--------------|--------------|----------|
| 1      | 19.518        | BB   | 0.1038      | 524.59283    | 78.70221     | 100.0000 |

Totals : 524.59283 78.70221

Signal 7: DAD1 G, Sig=300,16 Ref=off  
Signal has been modified after loading from rawdata file!

| Peak # | RetTime [min] | Type | Width [min] | Area [mAU*s] | Height [mAU] | Area %   |
|--------|---------------|------|-------------|--------------|--------------|----------|
| 1      | 19.518        | BB   | 0.1039      | 558.95642    | 83.67628     | 100.0000 |

Totals : 558.95642 83.67628

Signal 8: DAD1 H, Sig=320,16 Ref=off  
Signal has been modified after loading from rawdata file!

| Peak # | RetTime [min] | Type | Width [min] | Area [mAU*s] | Height [mAU] | Area %   |
|--------|---------------|------|-------------|--------------|--------------|----------|
| 1      | 19.518        | BB   | 0.1040      | 390.38800    | 58.39185     | 100.0000 |

Totals : 390.38800 58.39185

Data File C:\Chem32\1\Data\NHC\NHC\_4\_29\_F2.D  
Sample Name: run

=====  
\*\*\* End of Report \*\*\*

69. Sodium 3-methoxy-9-(3,4,5-trimethoxyphenyl)-5H-benzo[7]annulen-4-yl phosphate

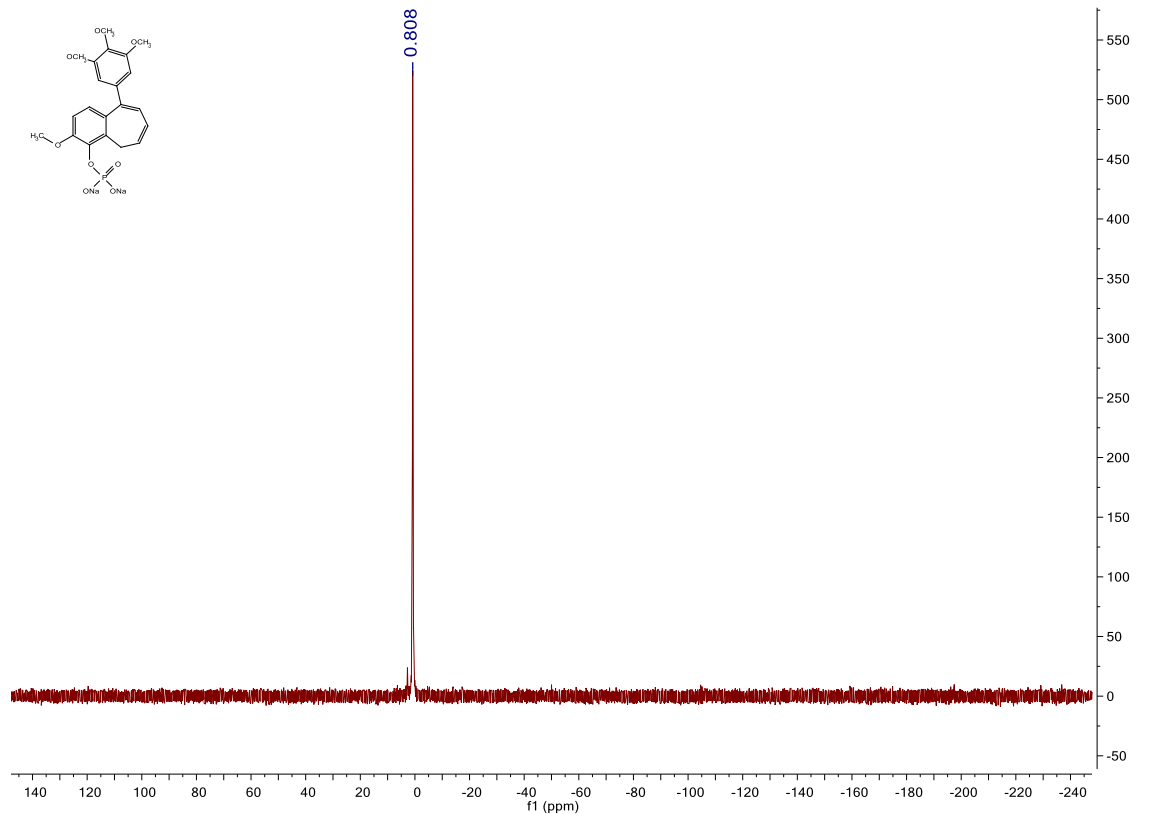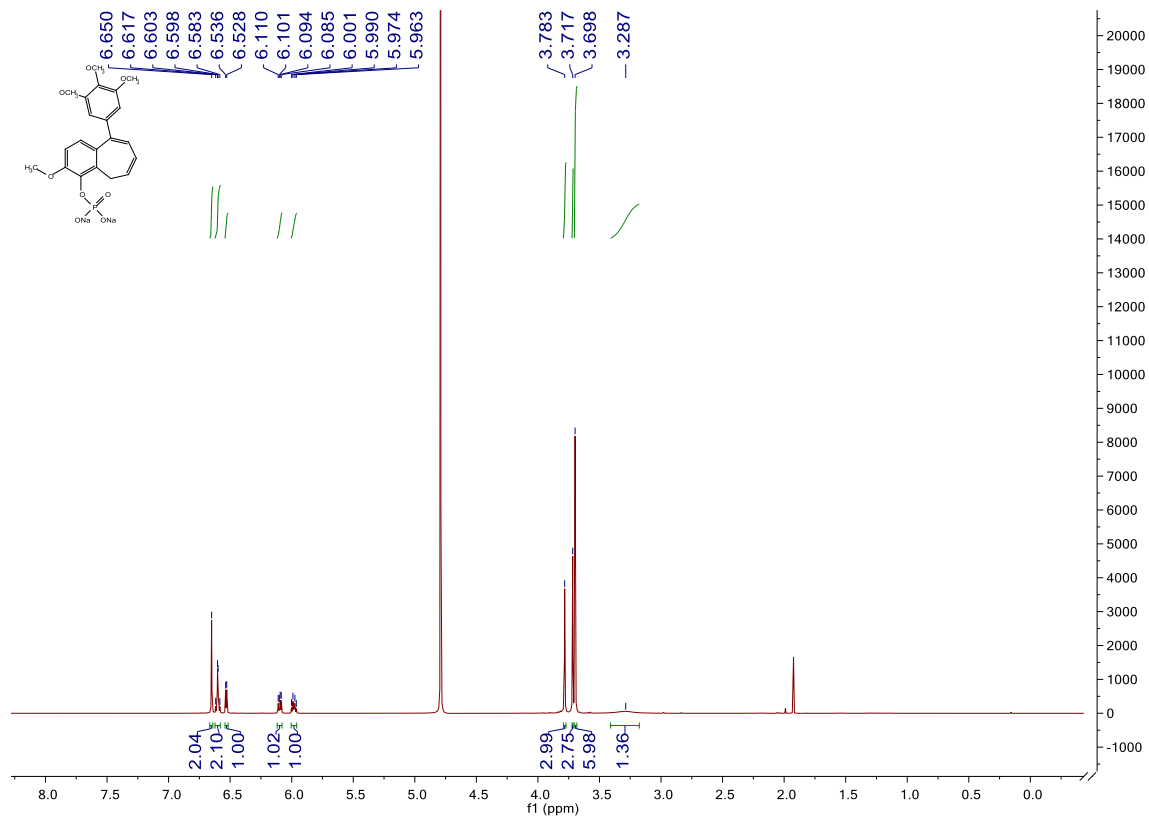

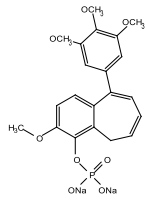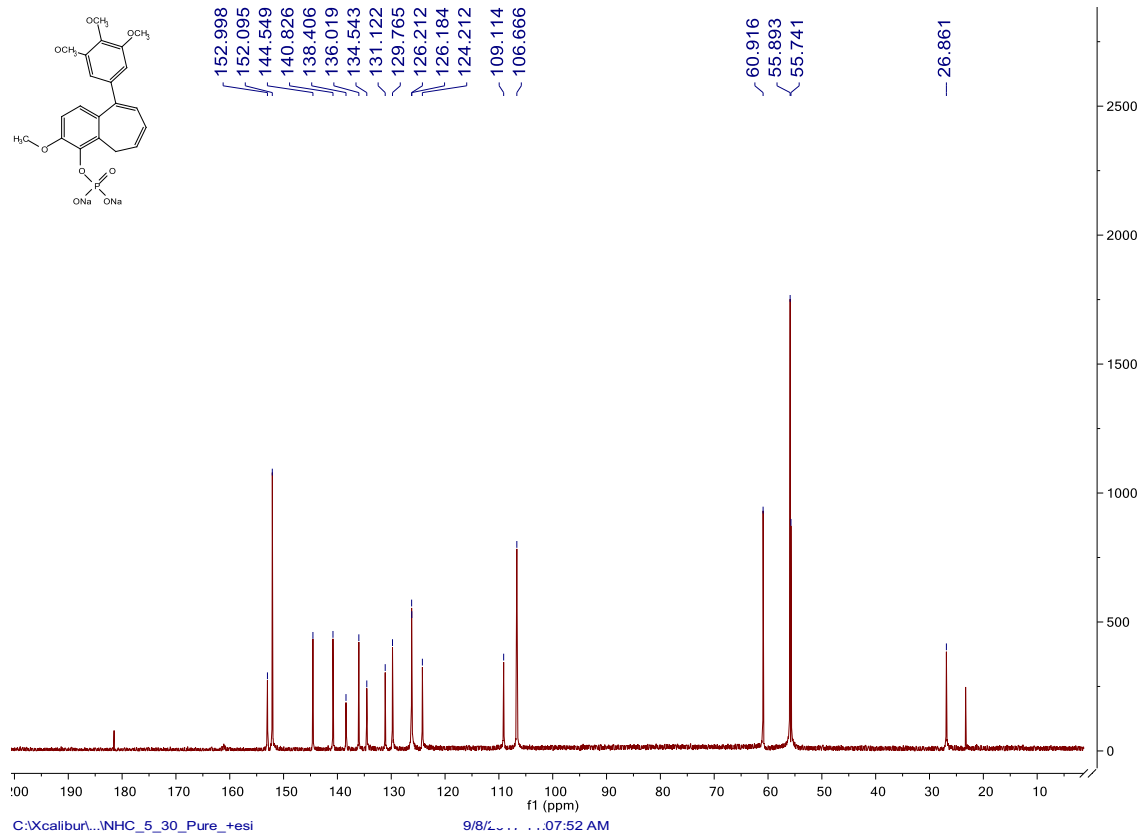

NHC\_5\_30\_Pure\_+esi #3-20 RT: 0.01-0.15 AV: 18 NL: 1.59E7  
 T: FTMS + p ESI Full ms [200.00-1000.00]

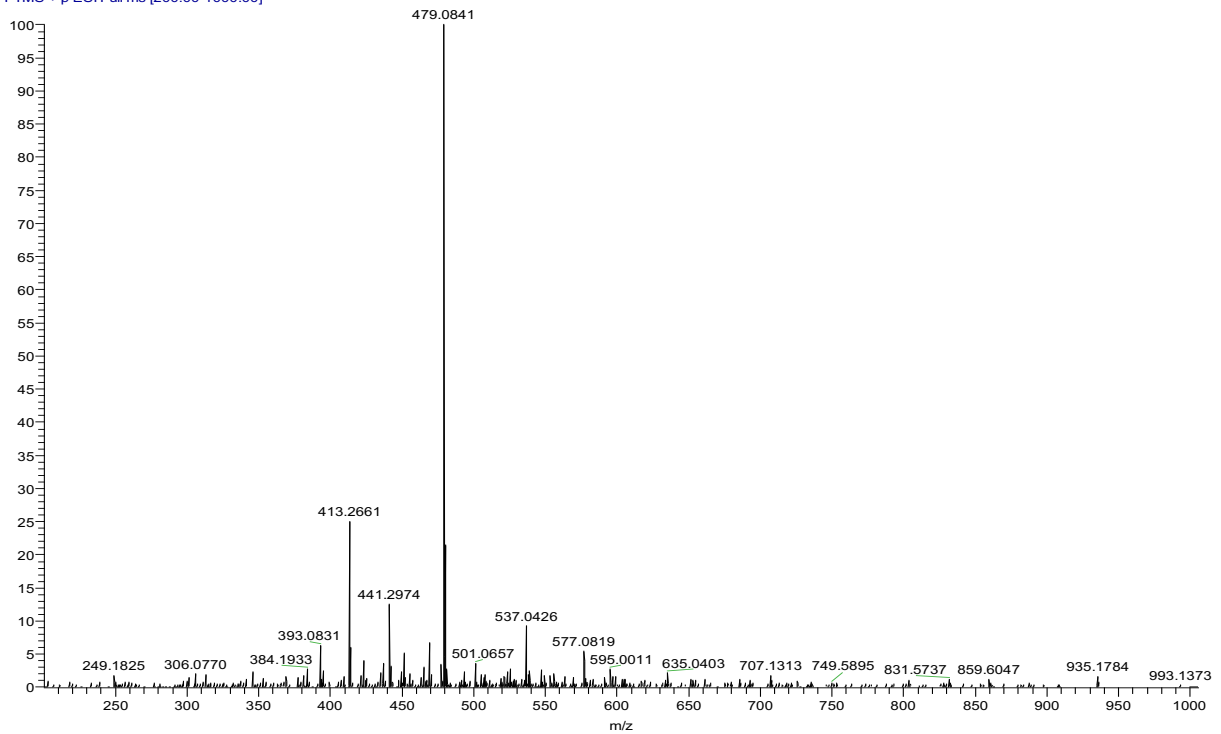

Data File C:\Chem32\1\Data\NHC\KGP513 salt\_TFA.D  
Sample Name: KGP513 salt\_TFA

=====  
Acq. Operator : SYSTEM  
Sample Operator : SYSTEM  
Acq. Instrument : 1200 HPLC Location : 1  
Injection Date : 2/23/2018 9:53:56 AM  
Inj Volume : No inj  
Acq. Method : C:\CHEM32\1\METHODS\MASTERMETHOD2.M  
Last changed : 12/2/2015 12:37:42 PM by Eric Lin  
Analysis Method : C:\Users\CHEMISTRY\Desktop\CHRISTINE\VANIHINGEDPHEN1.D\ACQ.M  
Last changed : 6/18/2014 3:18:53 PM by Christine  
Additional Info : Peak(s) manually integrated

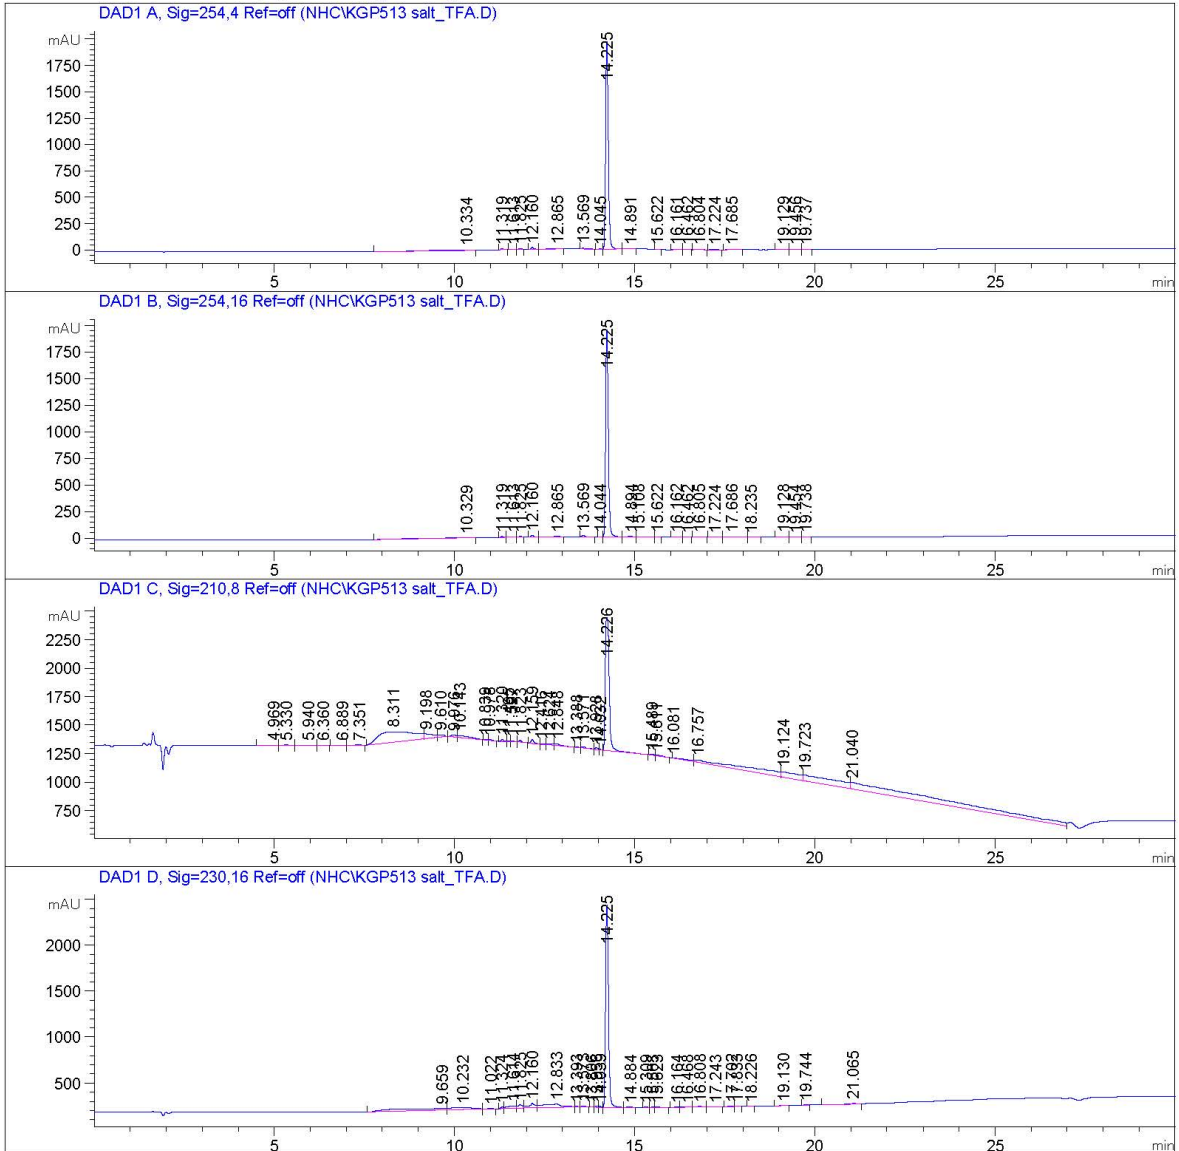

Data File C:\Chem32\1\Data\NHC\KGP513 salt\_TFA.D  
Sample Name: KGP513 salt\_TFA

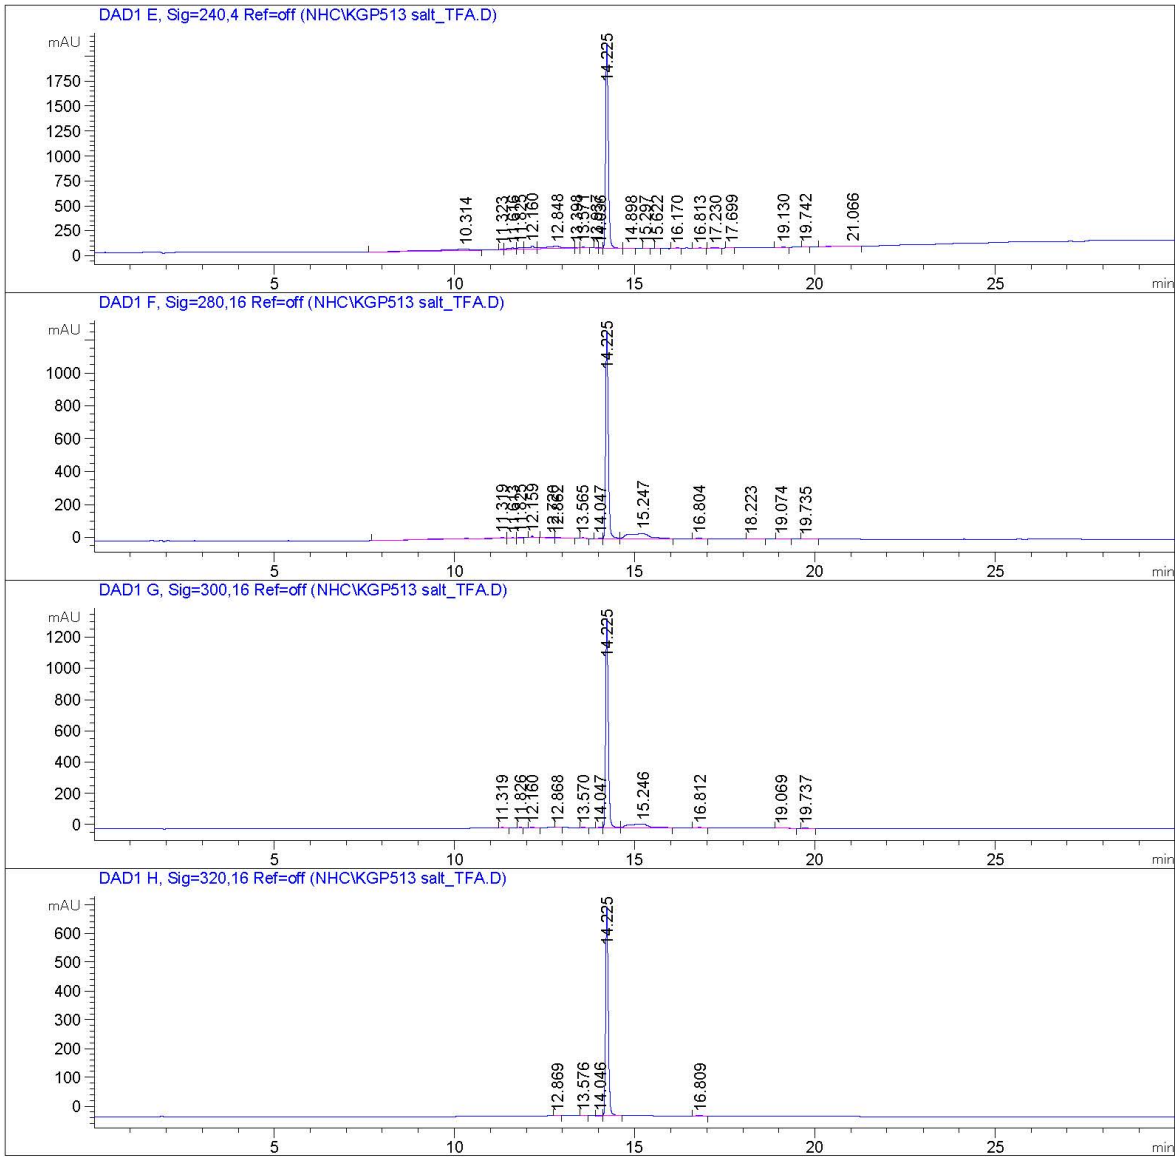

=====  
Area Percent Report  
=====

Sorted By : Signal  
Multiplier : 1.0000  
Dilution : 1.0000  
Use Multiplier & Dilution Factor with ISTDs

Data File C:\Chem32\1\Data\NHC\KGP513 salt\_TFA.D  
 Sample Name: KGP513 salt\_TFA

Signal 1: DAD1 A, Sig=254,4 Ref=off

| Peak # | RetTime [min] | Type | Width [min] | Area [mAU*s] | Height [mAU] | Area %  |
|--------|---------------|------|-------------|--------------|--------------|---------|
| 1      | 10.334        | BV   | 1.0671      | 364.58389    | 4.11725      | 3.3269  |
| 2      | 11.319        | BB   | 0.0710      | 45.74504     | 10.06239     | 0.4174  |
| 3      | 11.613        | BV   | 0.0796      | 10.14485     | 1.92030      | 0.0926  |
| 4      | 11.825        | VB   | 0.0692      | 41.18274     | 9.38475      | 0.3758  |
| 5      | 12.160        | BV   | 0.0758      | 94.26627     | 19.02197     | 0.8602  |
| 6      | 12.865        | VV   | 0.1586      | 66.90304     | 5.63251      | 0.6105  |
| 7      | 13.569        | VB   | 0.0946      | 60.37288     | 9.44519      | 0.5509  |
| 8      | 14.045        | BB   | 0.0768      | 13.17087     | 2.70600      | 0.1202  |
| 9      | 14.225        | BV   | 0.0774      | 1.00198e4    | 1966.54004   | 91.4329 |
| 10     | 14.891        | VB   | 0.1949      | 25.99766     | 1.77432      | 0.2372  |
| 11     | 15.622        | BB   | 0.0753      | 12.42037     | 2.62129      | 0.1133  |
| 12     | 16.161        | BB   | 0.1732      | 29.77633     | 2.91421      | 0.2717  |
| 13     | 16.462        | BB   | 0.1034      | 8.09889      | 1.16108      | 0.0739  |
| 14     | 16.804        | BB   | 0.1871      | 51.66618     | 4.59805      | 0.4715  |
| 15     | 17.224        | BB   | 0.1824      | 19.26022     | 1.45491      | 0.1758  |
| 16     | 17.685        | BB   | 0.2140      | 48.35583     | 3.09947      | 0.4413  |
| 17     | 19.129        | BV   | 0.1471      | 19.89521     | 2.01628      | 0.1815  |
| 18     | 19.456        | VV   | 0.1964      | 13.96277     | 1.14422      | 0.1274  |
| 19     | 19.737        | VB   | 0.0987      | 13.02931     | 2.03628      | 0.1189  |

Totals : 1.09586e4 2051.65050

Signal 2: DAD1 B, Sig=254,16 Ref=off

| Peak # | RetTime [min] | Type | Width [min] | Area [mAU*s] | Height [mAU] | Area %  |
|--------|---------------|------|-------------|--------------|--------------|---------|
| 1      | 10.329        | BB   | 1.0409      | 230.34048    | 2.66882      | 2.1198  |
| 2      | 11.319        | BV   | 0.0739      | 47.52680     | 9.91320      | 0.4374  |
| 3      | 11.613        | VV   | 0.1381      | 28.18924     | 2.73812      | 0.2594  |
| 4      | 11.825        | VB   | 0.0718      | 42.28798     | 9.17143      | 0.3892  |
| 5      | 12.160        | BV   | 0.0761      | 89.54153     | 17.98655     | 0.8240  |
| 6      | 12.865        | VV   | 0.1690      | 74.79410     | 5.85496      | 0.6883  |
| 7      | 13.569        | VV   | 0.0973      | 60.90246     | 9.19650      | 0.5605  |
| 8      | 14.044        | VB   | 0.0770      | 14.26166     | 2.92002      | 0.1312  |
| 9      | 14.225        | BB   | 0.0772      | 9885.65137   | 1947.65454   | 90.9765 |
| 10     | 14.894        | BV   | 0.2143      | 63.55091     | 3.85523      | 0.5849  |
| 11     | 15.108        | VB   | 0.2670      | 72.90054     | 3.61946      | 0.6709  |
| 12     | 15.622        | BB   | 0.0747      | 11.40344     | 2.43370      | 0.1049  |
| 13     | 16.162        | BB   | 0.1706      | 28.02155     | 2.75561      | 0.2579  |
| 14     | 16.462        | BB   | 0.1050      | 8.63266      | 1.21278      | 0.0794  |
| 15     | 16.805        | BB   | 0.1602      | 49.97883     | 4.47887      | 0.4599  |
| 16     | 17.224        | BB   | 0.1812      | 19.59429     | 1.45408      | 0.1803  |
| 17     | 17.686        | BV   | 0.2772      | 77.43287     | 3.65467      | 0.7126  |
| 18     | 18.235        | VB   | 0.1801      | 14.42759     | 1.10688      | 0.1328  |
| 19     | 19.128        | BV   | 0.1661      | 20.96198     | 2.07127      | 0.1929  |
| 20     | 19.454        | VV   | 0.1706      | 13.06426     | 1.06877      | 0.1202  |
| 21     | 19.738        | VB   | 0.0986      | 12.68909     | 1.98541      | 0.1168  |



Data File C:\Chem32\1\Data\NHC\KGP513 salt\_TFA.D  
Sample Name: KGP513 salt\_TFA

Totals : 1.08662e4 2037.80087

Signal 3: DAD1 C, Sig=210,8 Ref=off

| Peak # | RetTime [min] | Type | Width [min] | Area [mAU*s] | Height [mAU] | Area %  |
|--------|---------------|------|-------------|--------------|--------------|---------|
| 1      | 4.969         | BV   | 0.2793      | 59.38541     | 2.77892      | 0.1432  |
| 2      | 5.330         | VB   | 0.2216      | 73.94147     | 5.40461      | 0.1783  |
| 3      | 5.940         | BV   | 0.2946      | 77.44138     | 3.81852      | 0.1868  |
| 4      | 6.360         | VB   | 0.1848      | 22.55084     | 2.07509      | 0.0544  |
| 5      | 6.889         | BV   | 0.2459      | 25.50157     | 1.30544      | 0.0615  |
| 6      | 7.351         | VB   | 0.2053      | 36.07074     | 2.11196      | 0.0870  |
| 7      | 8.311         | BV   | 0.8612      | 6154.67822   | 90.52409     | 14.8431 |
| 8      | 9.198         | VV   | 0.2354      | 728.63788    | 40.99575     | 1.7572  |
| 9      | 9.610         | VB   | 0.1724      | 253.50475    | 22.68634     | 0.6114  |
| 10     | 9.976         | BV   | 0.1725      | 154.76651    | 13.42912     | 0.3732  |
| 11     | 10.143        | VB   | 0.3489      | 449.89648    | 17.21574     | 1.0850  |
| 12     | 10.839        | BV   | 0.1358      | 15.42967     | 1.58139      | 0.0372  |
| 13     | 10.978        | VB   | 0.1482      | 50.63254     | 5.45940      | 0.1221  |
| 14     | 11.320        | BV   | 0.0880      | 117.40595    | 19.57756     | 0.2831  |
| 15     | 11.495        | VV   | 0.0768      | 36.16812     | 6.72010      | 0.0872  |
| 16     | 11.597        | VB   | 0.0959      | 55.25023     | 8.27662      | 0.1332  |
| 17     | 11.823        | BB   | 0.0796      | 88.95613     | 16.85888     | 0.2145  |
| 18     | 12.159        | BV   | 0.0827      | 197.35747    | 35.61134     | 0.4760  |
| 19     | 12.416        | VV   | 0.1276      | 39.75274     | 4.31197      | 0.0959  |
| 20     | 12.624        | VV   | 0.1494      | 115.20856    | 10.38821     | 0.2778  |
| 21     | 12.848        | VB   | 0.1537      | 188.60291    | 16.97095     | 0.4548  |
| 22     | 13.388        | BV   | 0.0882      | 20.61618     | 3.52447      | 0.0497  |
| 23     | 13.571        | VV   | 0.1081      | 110.04835    | 14.90671     | 0.2654  |
| 24     | 13.928        | VV   | 0.0845      | 86.32745     | 15.60852     | 0.2082  |
| 25     | 14.032        | VB   | 0.0662      | 31.06448     | 7.51463      | 0.0749  |
| 26     | 14.226        | BB   | 0.1227      | 8867.73535   | 1166.39758   | 21.3861 |
| 27     | 15.489        | BV   | 0.1075      | 44.92231     | 5.85696      | 0.1083  |
| 28     | 15.611        | VB   | 0.1514      | 93.04314     | 8.26133      | 0.2244  |
| 29     | 16.081        | BV   | 1.1458      | 184.40137    | 1.94552      | 0.4447  |
| 30     | 16.757        | VV   | 2.4707      | 3879.17554   | 18.72643     | 9.3553  |
| 31     | 19.124        | VV   | 0.4358      | 1657.07690   | 47.40188     | 3.9963  |
| 32     | 19.723        | VV   | 0.9256      | 3799.64600   | 49.16460     | 9.1635  |
| 33     | 21.040        | VV   | 2.8908      | 1.37497e4    | 55.95520     | 33.1599 |

Totals : 4.14649e4 1723.36583

Signal 4: DAD1 D, Sig=230,16 Ref=off

| Peak # | RetTime [min] | Type | Width [min] | Area [mAU*s] | Height [mAU] | Area %  |
|--------|---------------|------|-------------|--------------|--------------|---------|
| 1      | 9.659         | BV   | 1.5060      | 2057.79663   | 16.39898     | 11.2808 |
| 2      | 10.232        | VB   | 0.4943      | 703.14252    | 17.29416     | 3.8546  |
| 3      | 11.022        | BB   | 0.1598      | 13.03095     | 1.26887      | 0.0714  |
| 4      | 11.324        | BV   | 0.0732      | 83.00867     | 16.91838     | 0.4551  |
| 5      | 11.614        | VV   | 0.2130      | 393.77121    | 23.55556     | 2.1586  |

Sample Name: KGP513 salt\_TFA

| Peak # | RetTime [min] | Type | Width [min] | Area [mAU*s] | Height [mAU] | Area %  |
|--------|---------------|------|-------------|--------------|--------------|---------|
| 6      | 11.825        | VV   | 0.1270      | 313.02353    | 33.51480     | 1.7160  |
| 7      | 12.160        | VV   | 0.1766      | 651.90656    | 47.94473     | 3.5737  |
| 8      | 12.833        | VB   | 0.4290      | 1204.33240   | 34.86694     | 6.6021  |
| 9      | 13.393        | BV   | 0.0739      | 11.92508     | 2.58247      | 0.0654  |
| 10     | 13.573        | VB   | 0.0887      | 56.84451     | 9.94573      | 0.3116  |
| 11     | 13.806        | BV   | 0.0805      | 7.49349      | 1.44436      | 0.0411  |
| 12     | 13.936        | VV   | 0.0877      | 46.04342     | 7.93402      | 0.2524  |
| 13     | 14.039        | VB   | 0.0736      | 34.71891     | 7.28065      | 0.1903  |
| 14     | 14.225        | BV   | 0.0867      | 1.22107e4    | 2201.18823   | 66.9388 |
| 15     | 14.884        | VB   | 0.1742      | 18.08795     | 1.38621      | 0.0992  |
| 16     | 15.309        | VV   | 0.1084      | 17.79687     | 2.40447      | 0.0976  |
| 17     | 15.503        | VV   | 0.0942      | 18.77873     | 2.87648      | 0.1029  |
| 18     | 15.623        | VB   | 0.1184      | 47.98247     | 5.69091      | 0.2630  |
| 19     | 16.164        | BV   | 0.1546      | 31.26108     | 3.12757      | 0.1714  |
| 20     | 16.468        | VB   | 0.2036      | 38.26526     | 2.40524      | 0.2098  |
| 21     | 16.808        | BB   | 0.1507      | 65.37402     | 6.21731      | 0.3584  |
| 22     | 17.243        | BB   | 0.2068      | 27.19472     | 1.69829      | 0.1491  |
| 23     | 17.702        | BV   | 0.1366      | 28.63807     | 3.13377      | 0.1570  |
| 24     | 17.833        | VB   | 0.1331      | 18.45650     | 2.01017      | 0.1012  |
| 25     | 18.226        | BB   | 0.1032      | 6.52072      | 1.01138      | 0.0357  |
| 26     | 19.130        | BB   | 0.1707      | 34.35279     | 3.26504      | 0.1883  |
| 27     | 19.744        | BB   | 0.0907      | 15.74038     | 2.67236      | 0.0863  |
| 28     | 21.065        | BB   | 0.2250      | 85.39493     | 4.90846      | 0.4681  |

Totals : 1.82416e4 2464.94556

Signal 5: DAD1 E, Sig=240,4 Ref=off

| Peak # | RetTime [min] | Type | Width [min] | Area [mAU*s] | Height [mAU] | Area %  |
|--------|---------------|------|-------------|--------------|--------------|---------|
| 1      | 10.314        | BV   | 1.2834      | 1184.28394   | 11.05896     | 8.5940  |
| 2      | 11.323        | BV   | 0.0734      | 55.45825     | 11.27322     | 0.4024  |
| 3      | 11.616        | VV   | 0.2074      | 233.17108    | 14.36506     | 1.6921  |
| 4      | 11.825        | VV   | 0.1262      | 198.36234    | 21.38090     | 1.4395  |
| 5      | 12.160        | VV   | 0.1700      | 396.89346    | 30.46765     | 2.8801  |
| 6      | 12.848        | VV   | 0.4686      | 853.10999    | 22.38571     | 6.1908  |
| 7      | 13.398        | VV   | 0.1161      | 42.44704     | 5.26197      | 0.3080  |
| 8      | 13.571        | VB   | 0.1033      | 68.13227     | 9.77712      | 0.4944  |
| 9      | 13.937        | VV   | 0.0896      | 36.33102     | 6.08865      | 0.2636  |
| 10     | 14.036        | VB   | 0.0705      | 23.63801     | 5.25450      | 0.1715  |
| 11     | 14.225        | BB   | 0.0774      | 1.04506e4    | 2054.12817   | 75.8368 |
| 12     | 14.898        | BB   | 0.1661      | 16.06753     | 1.30054      | 0.1166  |
| 13     | 15.297        | BB   | 0.0937      | 6.60305      | 1.10592      | 0.0479  |
| 14     | 15.622        | BV   | 0.0716      | 7.47353      | 1.68928      | 0.0542  |
| 15     | 16.170        | BB   | 0.1577      | 22.95993     | 2.44143      | 0.1666  |
| 16     | 16.813        | BB   | 0.1367      | 28.20684     | 2.97366      | 0.2047  |
| 17     | 17.230        | BB   | 0.1888      | 30.37091     | 2.12414      | 0.2204  |
| 18     | 17.699        | BB   | 0.1197      | 10.61716     | 1.35069      | 0.0770  |
| 19     | 19.130        | BB   | 0.1738      | 26.68450     | 2.51552      | 0.1936  |
| 20     | 19.742        | BB   | 0.0926      | 11.41683     | 1.88684      | 0.0828  |
| 21     | 21.066        | BB   | 0.2772      | 77.54187     | 3.54540      | 0.5627  |

Data File C:\Chem32\1\Data\NHC\KGP513 salt\_TFA.D  
Sample Name: KGP513 salt\_TFA

| Peak #   | RetTime [min] | Type | Width [min] | Area [mAU*s] | Height [mAU] | Area % |
|----------|---------------|------|-------------|--------------|--------------|--------|
| Totals : |               |      |             | 1.37803e4    | 2212.37535   |        |

Signal 6: DAD1 F, Sig=280,16 Ref=off

| Peak #   | RetTime [min] | Type | Width [min] | Area [mAU*s] | Height [mAU] | Area %  |
|----------|---------------|------|-------------|--------------|--------------|---------|
| 1        | 11.319        | BV   | 0.8534      | 452.68979    | 6.32186      | 5.4969  |
| 2        | 11.613        | VV   | 0.1253      | 16.51236     | 1.79485      | 0.2005  |
| 3        | 11.825        | VV   | 0.0742      | 29.01138     | 6.02226      | 0.3523  |
| 4        | 12.159        | BB   | 0.0751      | 53.81640     | 11.00502     | 0.6535  |
| 5        | 12.720        | BV   | 0.1866      | 33.75927     | 2.33593      | 0.4099  |
| 6        | 12.862        | VV   | 0.1300      | 34.69127     | 3.68000      | 0.4212  |
| 7        | 13.565        | BB   | 0.0883      | 19.86325     | 3.49492      | 0.2412  |
| 8        | 14.047        | BV   | 0.0785      | 14.99003     | 2.99162      | 0.1820  |
| 9        | 14.225        | VV   | 0.0762      | 6291.78174   | 1261.78394   | 76.4000 |
| 10       | 15.247        | VB   | 0.5383      | 1210.39124   | 28.56665     | 14.6976 |
| 11       | 16.804        | BB   | 0.1623      | 40.61341     | 3.52855      | 0.4932  |
| 12       | 18.223        | BB   | 0.1576      | 12.82129     | 1.23054      | 0.1557  |
| 13       | 19.074        | BB   | 0.1487      | 17.04829     | 1.79632      | 0.2070  |
| 14       | 19.735        | BB   | 0.0967      | 7.32975      | 1.14508      | 0.0890  |
| Totals : |               |      |             | 8235.31946   | 1335.69753   |         |

Signal 7: DAD1 G, Sig=300,16 Ref=off

| Peak #   | RetTime [min] | Type | Width [min] | Area [mAU*s] | Height [mAU] | Area %  |
|----------|---------------|------|-------------|--------------|--------------|---------|
| 1        | 11.319        | BB   | 0.0757      | 10.59825     | 2.14446      | 0.1368  |
| 2        | 11.826        | BV   | 0.0683      | 9.12248      | 2.11537      | 0.1178  |
| 3        | 12.160        | BB   | 0.0759      | 17.84779     | 3.59445      | 0.2304  |
| 4        | 12.868        | BB   | 0.0739      | 10.27431     | 2.22548      | 0.1326  |
| 5        | 13.570        | BV   | 0.0966      | 13.73831     | 2.14906      | 0.1773  |
| 6        | 14.047        | BV   | 0.0889      | 24.15033     | 4.34292      | 0.3117  |
| 7        | 14.225        | VV   | 0.0765      | 6716.51221   | 1339.15881   | 86.6968 |
| 8        | 15.246        | VB   | 0.5408      | 902.18079    | 21.10354     | 11.6454 |
| 9        | 16.812        | BB   | 0.1441      | 23.94751     | 2.32604      | 0.3091  |
| 10       | 19.069        | BB   | 0.1415      | 11.56425     | 1.25546      | 0.1493  |
| 11       | 19.737        | BB   | 0.0945      | 7.19147      | 1.15778      | 0.0928  |
| Totals : |               |      |             | 7747.12771   | 1381.57337   |         |

Data File C:\Chem32\1\Data\NHC\KGP513 salt\_TFA.D  
Sample Name: KGP513 salt\_TFA

Signal 8: DAD1 H, Sig=320,16 Ref=off

| Peak # | RetTime [min] | Type | Width [min] | Area [mAU*s] | Height [mAU] | Area %  |
|--------|---------------|------|-------------|--------------|--------------|---------|
| 1      | 12.869        | BB   | 0.0749      | 6.74006      | 1.43153      | 0.1842  |
| 2      | 13.576        | BB   | 0.0840      | 10.08056     | 1.83758      | 0.2755  |
| 3      | 14.046        | BV   | 0.0844      | 8.78677      | 1.69668      | 0.2402  |
| 4      | 14.225        | VB   | 0.0760      | 3611.94531   | 726.27673    | 98.7219 |
| 5      | 16.809        | BB   | 0.1528      | 21.15385     | 1.94576      | 0.5782  |

Totals :                                   3658.70655   733.18828

=====  
\*\*\* End of Report \*\*\*

Inhibition of tubulin polymerization, percent inhibition of colchicine binding, and cytotoxicity of the benzosuberene and dihydronaphthalene analogues.

| Compound    | Inhibition of tubulin polymerization<br>IC <sub>50</sub> (μM) ± SD | % Inhibition of colchicine binding ± SD | GI <sub>50</sub> (μM) SRB assay <sup>a</sup> ± SD |                        |                        |
|-------------|--------------------------------------------------------------------|-----------------------------------------|---------------------------------------------------|------------------------|------------------------|
|             |                                                                    |                                         | SK-OV-3                                           | NCI-H460               | DU-145                 |
| CA4         | 1.0 <sup>b</sup>                                                   | 84 ± 3 (1 μM), 98 ± 0.007 (5 μM)        | 0.00455                                           | 0.00223 <sup>c</sup>   | 0.00327 <sup>c</sup>   |
| CA4P        | >40 <sup>b</sup>                                                   | ND                                      | 0.00119                                           | 0.00194 <sup>c</sup>   | 0.00323 <sup>c</sup>   |
| KGP18       | 0.85 ± 0.02 <sup>d</sup>                                           | 73 ± 5 (1 μM), 95 ± 0.5 (5 μM)          | 0.0000543 <sup>e</sup>                            | 0.0000418 <sup>c</sup> | 0.0000249 <sup>e</sup> |
| KGP03       | 0.5 <sup>f</sup>                                                   | 90 ± 2 (1 μM), 98 ± 0.3 (5 μM)          | 0.0029 <sup>f</sup>                               | 0.0032 <sup>f</sup>    | 0.00040 <sup>f</sup>   |
| Doxorubicin | ND                                                                 | ND                                      | 0.0789±0.0551                                     | 0.123±0.066            | 0.134±0.0842           |
| Paclitaxel  | NR                                                                 | NR                                      | 0.00134±0.000408                                  | 0.00176±0.000399       | 0.00147±0.000442       |
| 3           | >20                                                                | ND                                      | 0.394±0.0134                                      | 0.173±0.167            | 0.0330±0.0146          |
| 6           | 1.2 ± 0.1                                                          | 72 ± 2 (5 μM)                           | 0.0314±0.0105                                     | 0.0476±0.0148          | 0.141±0.094            |
| 8           | >20                                                                | ND                                      | 6.52±0.71                                         | 1.90±0.42              | 5.66±0.35              |
| 11          | >20                                                                | ND                                      | 3.22±0.57                                         | 0.855±0.114            | 3.76±0.41              |
| 13          | 0.39 ± 0.06                                                        | 88 ± 1 (5 μM)                           | 0.0221±0.0011                                     | 0.0353±0.0095          | 0.0362±0.0111          |
| 14          | 4.9 ± 0.1                                                          | 35 ± 5 (1 μM)                           | 0.312±0.116                                       | 0.449±0.046            | 0.423±0.110            |
| 15          | >20                                                                | 0 (5 μM)                                | 3.03±1.25                                         | 3.86±1.15              | 4.04±1.74              |
| 18          | 1.1 ± 0.1                                                          | 62 ± 0.7 (5 μM)                         | 0.0648±0.0088                                     | 0.434±0.122            | 0.860±0.267            |
| 19          | 0.37 ± 0.08                                                        | 73 ± 0.6 (5 μM)                         | 0.0384±0.0102                                     | 0.0605±0.0027          | 0.0252±0.00223         |
| 20          | 3.2 ± 0.08                                                         | 61 ± 3 (5 μM)                           | 0.0572±0.0110                                     | 0.0847±0.0087          | 0.0402±0.0155          |
| 27          | 1.0 ± 0.07                                                         | 47 ± 1 (5 μM)                           | 0.299±0.025                                       | 0.353±0.024            | 0.631±0.134            |
| 28          | 0.63 ± 0.03                                                        | 76 ± 2 (5 μM)                           | 0.0403±0.0028                                     | 0.0628±0.0013          | ND                     |
| 37          | 3.8 ± 0.5                                                          | 28 ± 4 (5 μM)                           | 0.263±0.019                                       | 0.432±0.169            | 0.439±0.220            |
| 49          | >20                                                                | 0.4 ± 0.6 (5 μM)                        | ND                                                | 0.334±0.004            | 1.20 <sup>g</sup>      |
| 56          | >20                                                                | 0 (5 μM)                                | 27.2±4.4                                          | 70.5±33.6              | 26.0±5.4               |
| 57          | >20                                                                | 0 (5 μM)                                | 5.77±0.82                                         | 2.00±0.55              | 4.45±0.63              |
| 68          | 0.48 ± 0.08                                                        | 68 ± 1 (0.5 μM), 95 ± 0.8 (5 μM)        | 0.00690±0.00215                                   | 0.0581±0.0206          | 0.0976±0.0352          |
| 69          | 16 ± 0.7                                                           | 45 ± 2 (5 μM)                           | 0.0153±0.0008                                     | 0.0291±0.0068          | 0.0239±0.0079          |

<sup>a</sup> Average of n ≥ 3 independent determinations (unless otherwise noted)

<sup>b</sup> Data from ref. 24<sup>24</sup> and ref. 74<sup>74</sup>

<sup>c</sup> For additional data, see ref. 24<sup>24</sup>

<sup>d</sup> For additional data, see ref. 37<sup>37</sup>

<sup>e</sup> For additional data, see ref. 8<sup>8</sup>

<sup>f</sup> For additional data, see ref. 36<sup>36</sup> and ref. 75<sup>75</sup>

<sup>§</sup> Average of n = 2 independent determinations (of duplicates)  
ND = Not Determined  
NR = Not Relevant (paclitaxel enhances microtubule assembly)
